# Supplementary material
Source: PubMed Central journal article supplement (PMC7324209)
Supplement: jci-130-129018-s204.pdf [file jci-130-129018-s204.pdf]

## Supplemental Figures

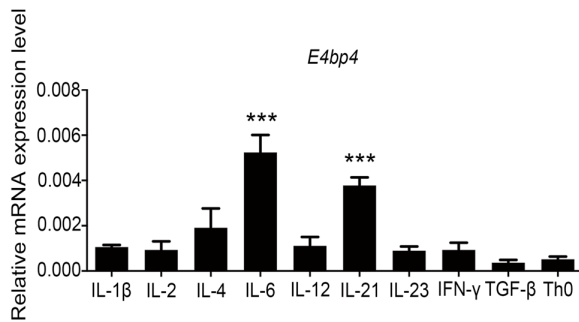

### Supplemental Figure 1. Cytokines for inducing E4BP4 expression

Naïve CD4<sup>+</sup> T cells from C57BL/6 mice were stimulated with anti-CD3/CD28 antibodies and a panel of cytokines was added. After three days, cells were obtained for quantitative PCR (qPCR) analysis of *E4bp4* expression. (n=3). Data are representative of three independent experiments. One-way ANOVA with Bonferroni's *post hoc* test.

\*\*\*P<0.001

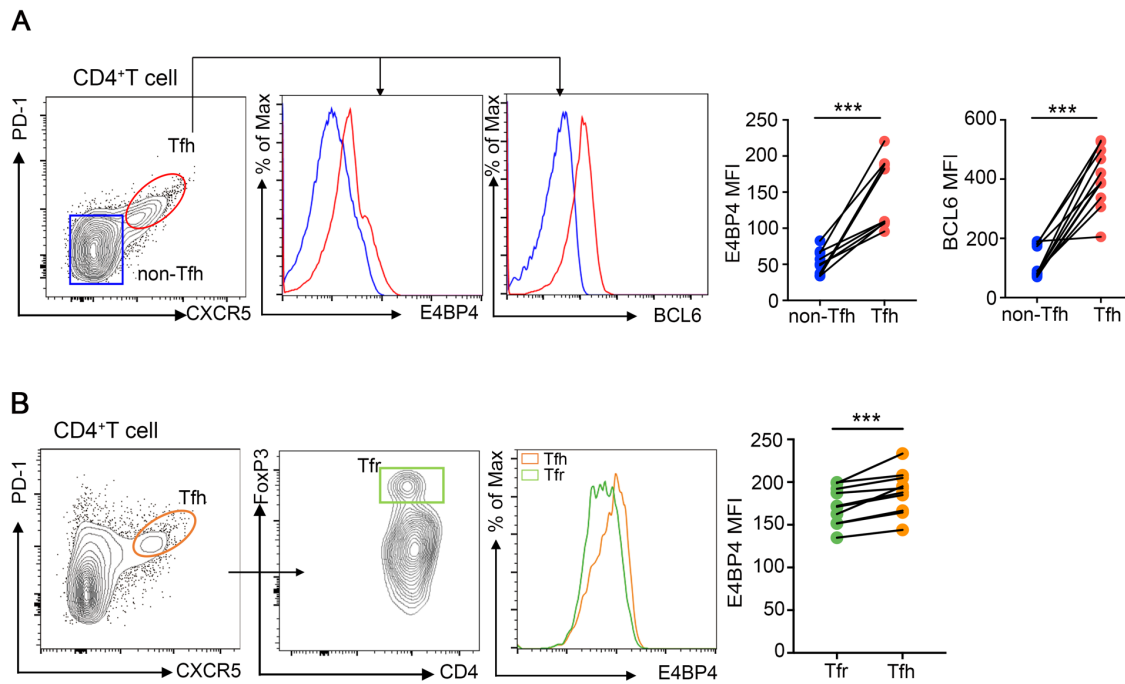

**Supplemental Figure 2. E4BP4 expression is significantly increased in murine Tfh cells**

(A) Analysis of E4BP4 and BCL6 MFI expressions in Tfh or non-Tfh cells from C57BL/6 mice after seven days of SRBCs immunization; (n=10). (B) Analysis of E4BP4 expression in Tfh and Tfr cells from C57BL/6 mice following seven days of KLH immunization. (n=10). Data are representative of three independent experiments. Student's *t* test. \*\*\*P<0.001.

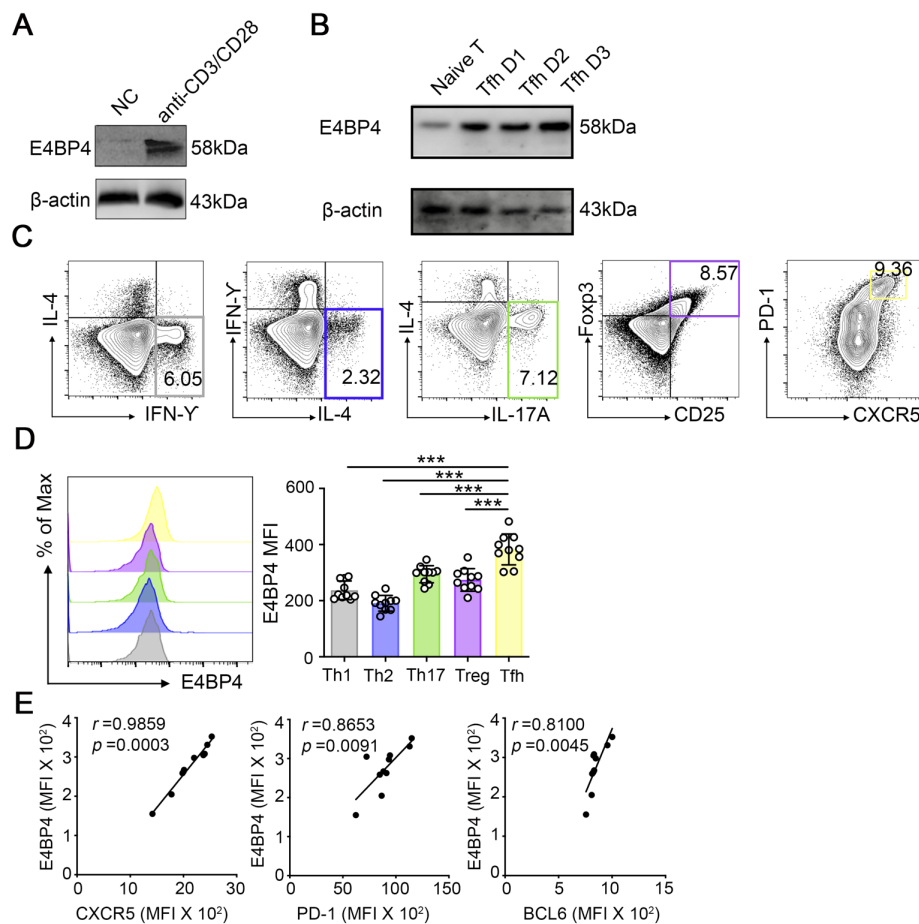

### Supplemental Figure 3. E4BP4 expression in human T cells

(A) Western blot analysis of E4BP4 protein expression in human peripheral CD4<sup>+</sup> T cells stimulated with anti-CD3/CD28 or untreated negative control (NC). (B) Western blot analysis of E4BP4 protein expression in human Tfh cells (*in vitro* polarized) on different days. (C) Flow cytometric analysis of the percentages of Th1 (IFN- $\gamma$ <sup>+</sup>), Th2 (IL-4<sup>+</sup>), Th17 (IL17A<sup>+</sup>), Treg (CD25<sup>+</sup>FoxP3<sup>+</sup>) and Tfh (CXCR5<sup>+</sup>PD-1<sup>+</sup>) cells in human tonsil CD4<sup>+</sup> T cells. (D) Analysis of E4BP4 MFI in T helper subsets outlined in (C). (E) The correlation between E4BP4 MFI

and CXCR5, BCL6 and PD-1 MFI in tonsillar CD4<sup>+</sup>CD45RO<sup>+</sup> memory/effector T cells. Dots indicate individual donors. (n=10). Data are representative of three independent experiments. For (D), one-way ANOVA analysis with Dunnett's *post hoc* test; For (E), Pearson's correlation coefficient was used for the correlation analysis (two-tailed); \*\*\*P<0.001.

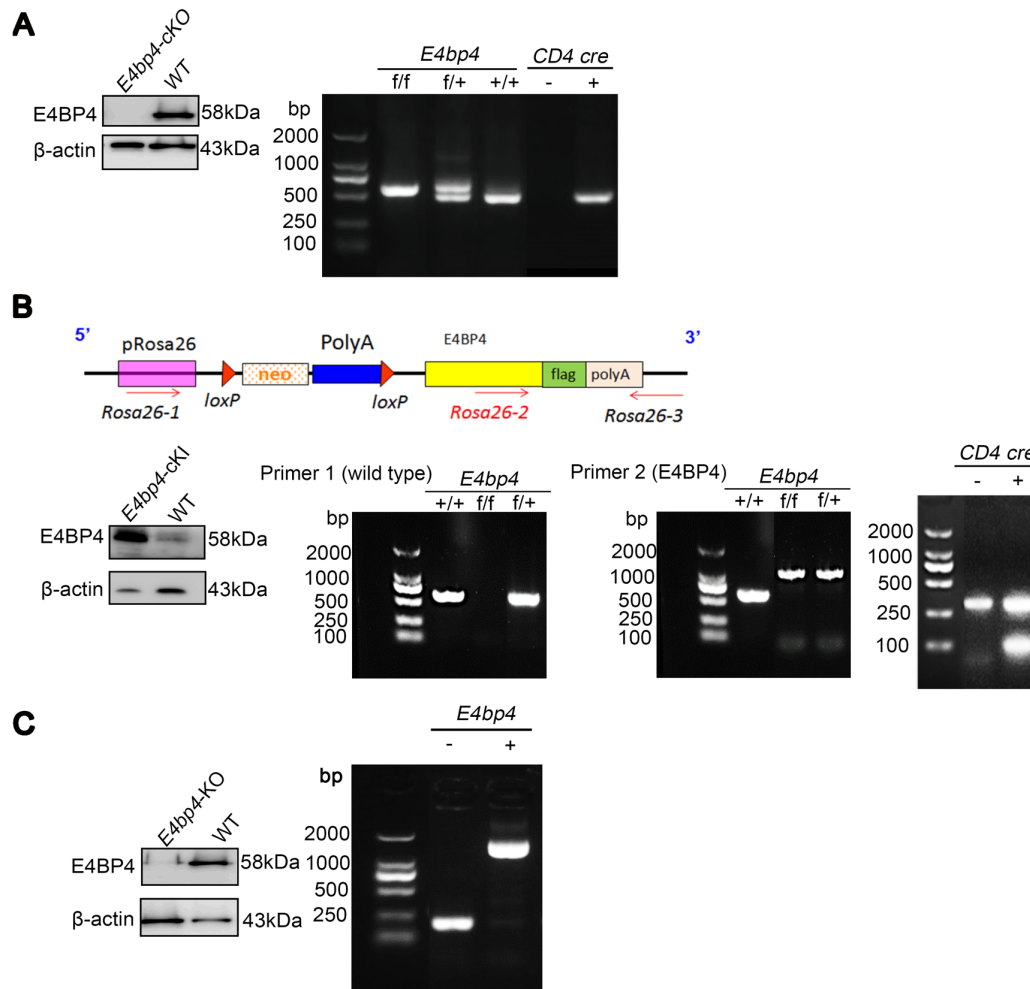

**Supplemental Figure 4. Generation of *E4bp4*-cKI mice and genotype identification for *E4bp4*-cKI, *E4bp4*-cKO and *E4bp4*-KO mice**

(A) Representative western blot and gel analysis of E4BP4 expression in CD4<sup>+</sup> T cells of *E4bp4*-cKO and WT mice. (B) Schematic representation of the E4BP4 locus and targeting strategy for generating the *E4bp4*-cKI mice. Cre-mediated recombination of loxP sites in mice. Representative western blot and gel analysis of E4BP4 expression in

CD4<sup>+</sup> T cells of the *E4bp4*-cKI and WT mice. (C) Representative western blot and gel analysis of E4BP4 expression of the *E4bp4*-KO and WT mice.

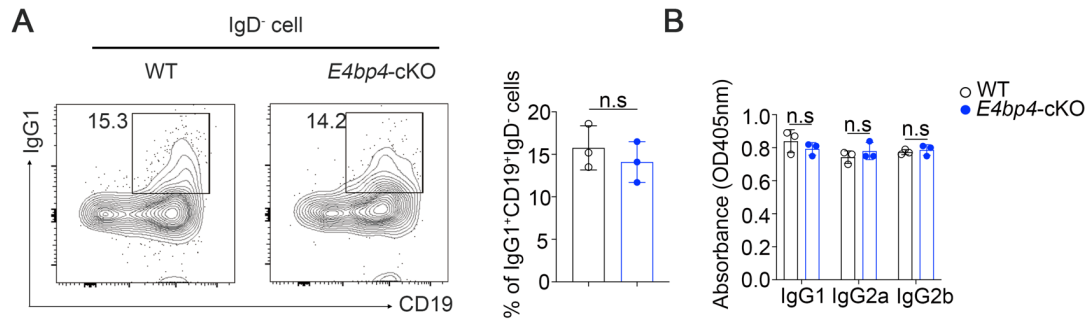

**Supplemental Figure 5. No alteration in stimulatory capacity was observed in the *E4bp4-cKO* mice**

Sorted CD4<sup>+</sup>CXCR5<sup>+</sup>PD-1<sup>+</sup> Tfh cells from the *E4bp4-cKO* and WT mice were co-cultured with GC B cells from the WT mice. (A) Flow cytometry analysis of the IgG1<sup>+</sup>CD19<sup>+</sup>IgD<sup>-</sup> cells was performed (left panel); statistical analysis is shown in the right-hand panel. (B) ELISA analysis of IgG1, IgG2a, IgG2b secretions in the coculture supernatant on day 7. (n =3); Data are representative of three independent experiments. Student's *t* test; n.s, not significant.

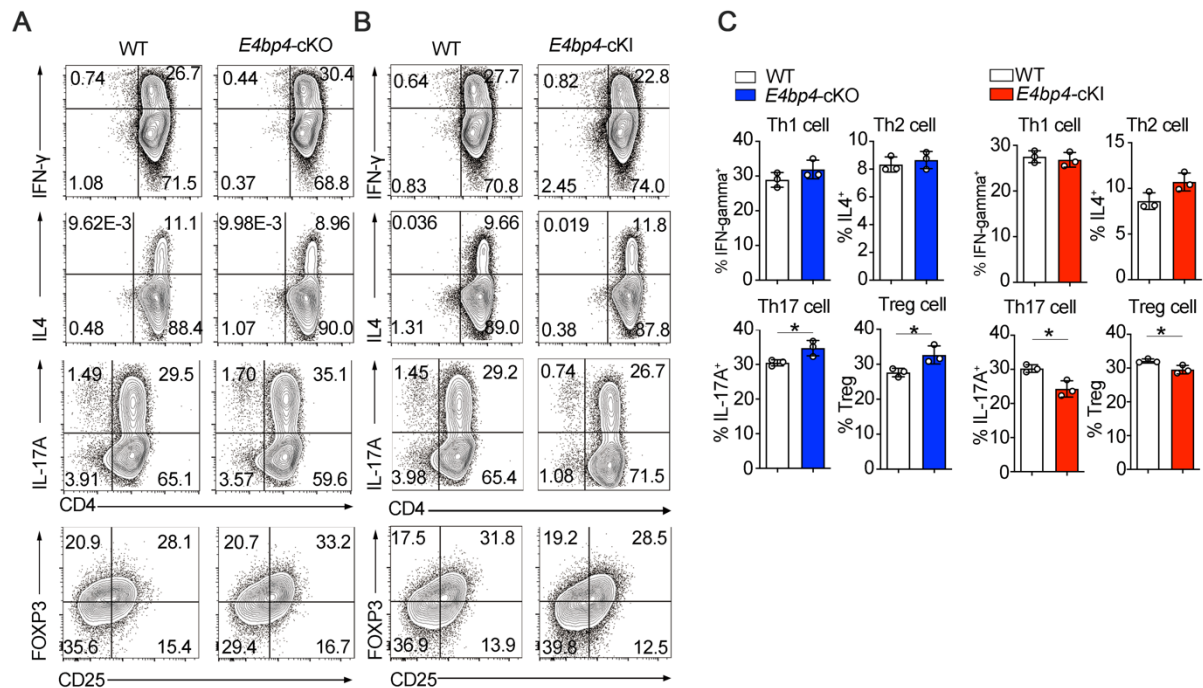

**Supplemental Figure 6. The effect of *E4bp4* deletion and *E4bp4* overexpression on *in vitro* differentiation of T helper subsets**

(A, B) Naïve CD4<sup>+</sup> T cells from the *E4bp4*-cKO and littermate controls, as well as the *E4bp4*-cKI and littermate controls, were cultured under classical Th1, Th17 and Treg polarizing conditions for three days, or in the case of the Th2 polarizing condition, for five days. Cells were stained with subset-specific markers to determine the differentiation potential of Th1, Th2, and Th17 cells and Tregs. (C) Statistical analysis of (A) and (B). (n = 3). Data are representative of



three independent experiments. Student's  $t$  test. \* $P < 0.05$ .

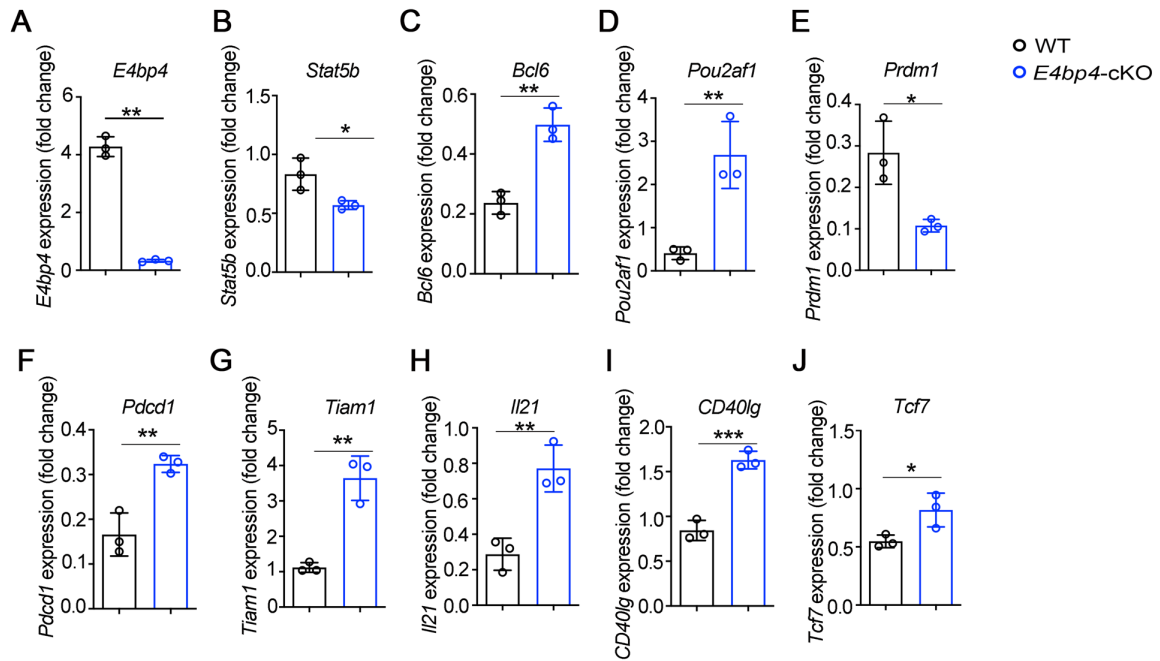

## Supplemental Figure 7. RT-qPCR verification of differentially expressed genes

Quantitative RT-PCR of selected genes, (A) *E4bp4*, (B) *Stat5b*, (C) *Bcl6*, (D) *Pou2af1*, (E) *Prdm1*, (F) *Pcdcl1*, (G) *Tiam1*, (H) *Il21*, (I) *Cd40lg*, (J) *Tcf7* in Figure 3H. Samples are from lymph node CD4<sup>+</sup> T cells of the *E4bp4*-cKO and WT mice seven days after KLH immunization. (n=3), Data are representative of three independent experiments. Student's *t* test. \*\*\*P<0.001, \*\*P<0.01, \*P<0.05.

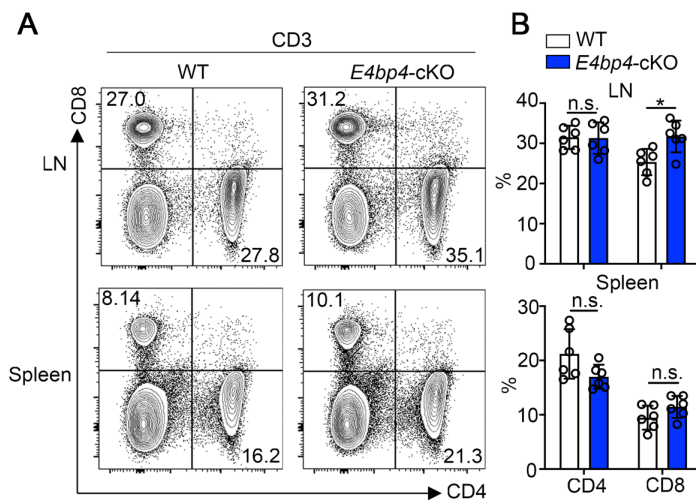

**Supplemental Fig 8. CD4, CD8 T cell populations in *E4bp4-cKO* mice upon immunization.**

(A) Flow cytometric analysis of CD4<sup>+</sup> and CD8<sup>+</sup> T cell distributions in CD3<sup>+</sup> T cells. (B) Analysis of (A). (n=6). Data are representative of three independent experiments. Student's *t* test. \*P<0.05.

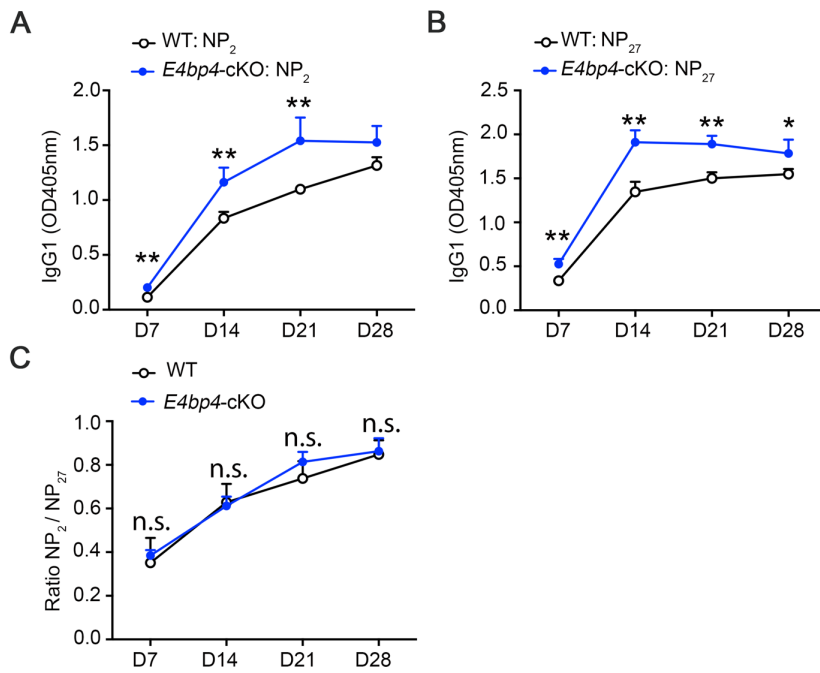

## Supplemental Figure 9. E4BP4 deficiency does not alter IgG1 affinity maturation

Age-matched *E4bp4*-cKO and WT mice were immunized with NP-KLH, and the high-affinity and total NP-specific IgG1 responses were determined on days 7, 14, 21 and 28. ELISA of anti-NP<sub>2</sub> (A) and anti-NP<sub>27</sub> (B) responses were shown. (C) NP<sub>2</sub>/NP<sub>27</sub> titer ratio in these mice. (n=6). Data are representative of three independent experiments. Student's *t* test. \*\*\*P<0.001, \*\*P<0.01, \*P<0.05; n.s., not significant.

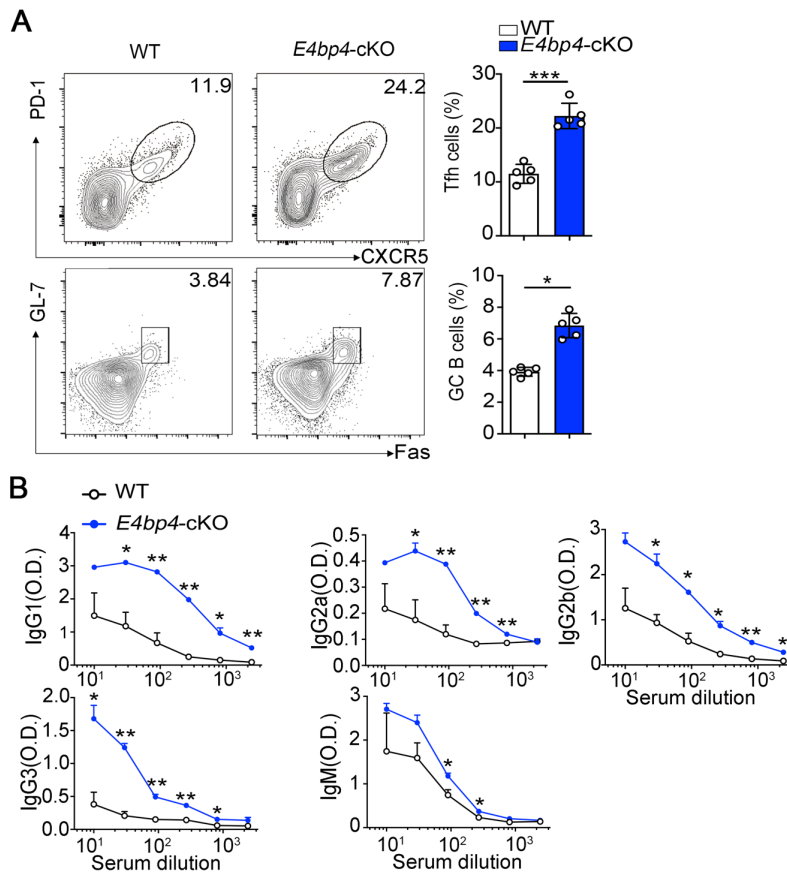

## Supplemental Figure 10. *E4bp4*-cKO mice give rise to increased GC responses upon SRBC immunization

The *E4bp4*-cKO and WT mice were immunized with  $2 \times 10^9$  SRBCs and isolated lymphocytes were analyzed after seven days. (A) Analysis of CD4<sup>+</sup>CXCR5<sup>+</sup>PD-1<sup>+</sup> Tfh cells and B220<sup>+</sup>Fas<sup>+</sup>GL7<sup>+</sup> GC B cells by flow cytometry. (B) Titers of serum anti-SRBC-specific IgG1, IgG2a, IgG2b, IgG3 and IgM in WT and *E4bp4*-cKO mice. (n=5). Data are representative of three independent experiments. Student's *t* test; \*\*\*P<0.001, \*\*P<0.01, \*P<0.05.

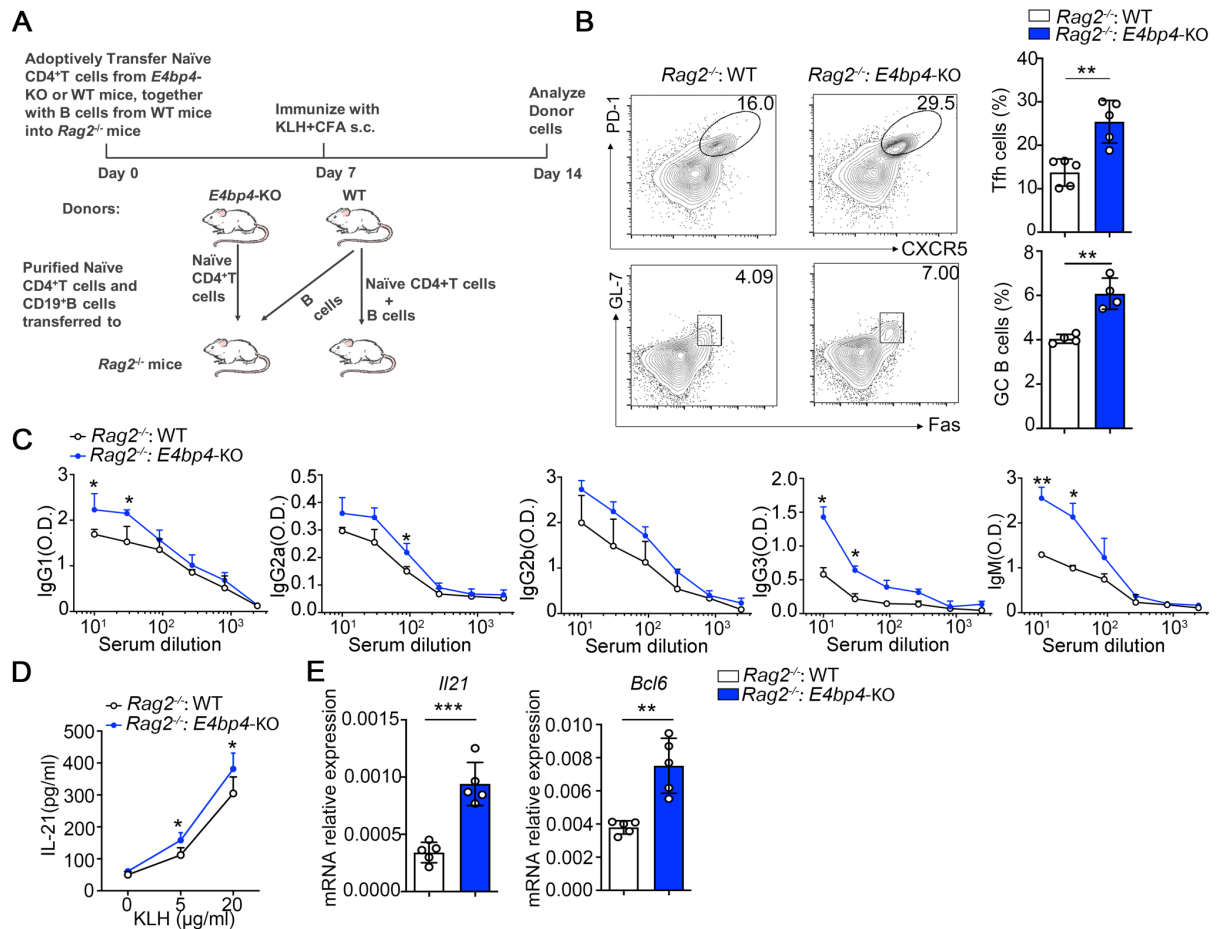

## Supplemental Figure 11. E4BP4 regulates Tfh cell differentiation in a cell-intrinsic manner

(A) Scheme of adoptive co-transfer of WT B cells and WT naïve CD4<sup>+</sup> T cells or *E4bp4*-KO naïve CD4<sup>+</sup> T cells into *Rag2*<sup>-/-</sup> mice followed by KLH immunization for 7 days. (B, C) Analysis of CD4<sup>+</sup>CXCR5<sup>+</sup>PD-1<sup>+</sup> Tfh cells and B220<sup>+</sup>Fas<sup>+</sup>GL7<sup>+</sup> GC B cells from *Rag2*<sup>-/-</sup> hosts by flow cytometry. (n=5) (C) Titer of serum anti-KLH-specific IgG1, IgG2a, IgG2b, IgG3 and IgM antibodies in *Rag2*<sup>-/-</sup> hosts. (D) Draining lymph node cells were restimulated with KLH for three days followed by

detection of supernatant IL-21 expression levels by ELISA. (E) *Il21* and *Bcl6* mRNA expression levels were detected by RT-PCR. (n=5), Data are representative of three independent experiments. Student's *t* test; \*\*\*P<0.001, \*\*P<0.01, \*P<0.05.

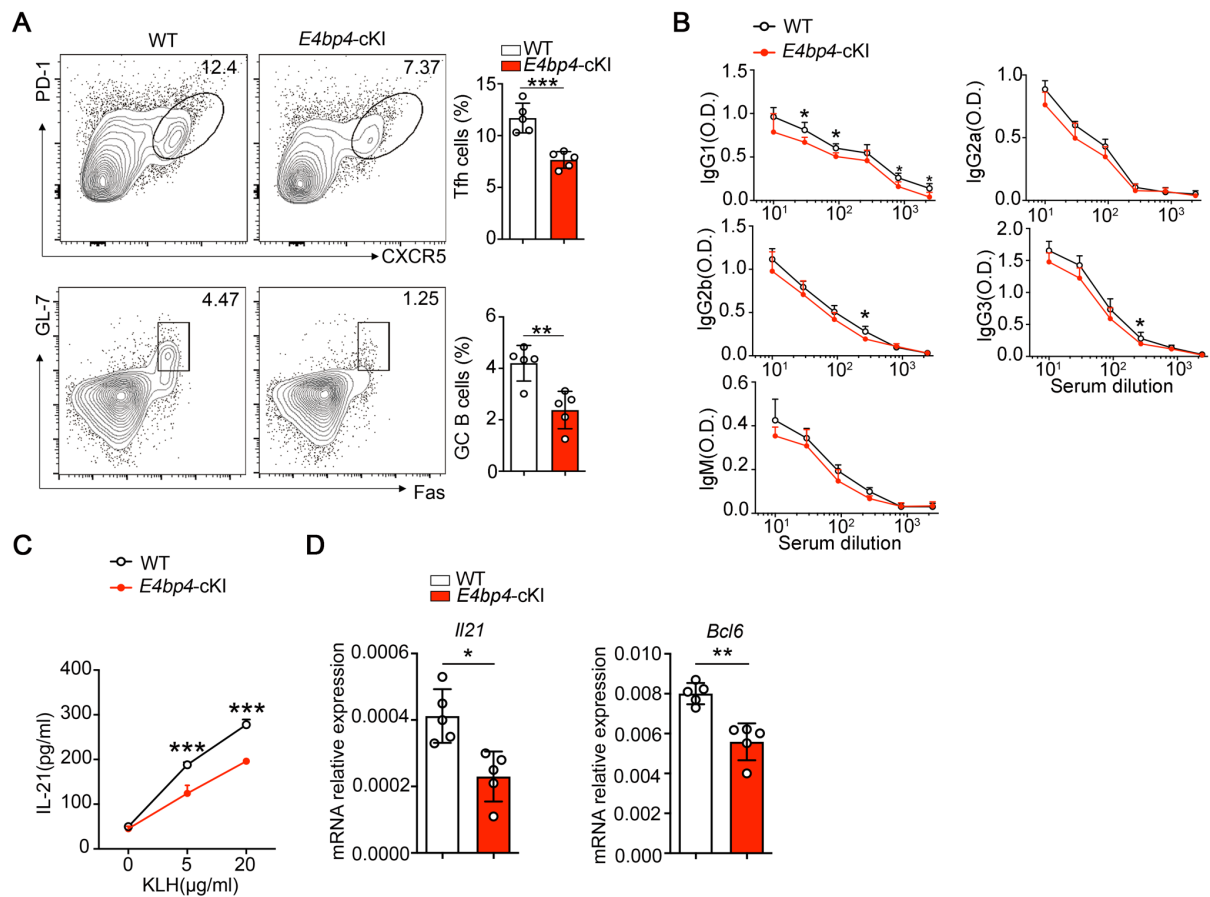

## Supplemental Figure 12. Forced expression of E4BP4 controls GC responses upon KLH immunization

The *E4bp4*-cKI mice and their littermates were immunized with KLH for 7 days. (A) Analysis of CD4<sup>+</sup>CXCR5<sup>+</sup>PD-1<sup>+</sup> Tfh cells and B220<sup>+</sup>Fas<sup>+</sup>GL7<sup>+</sup> GC B cells by flow cytometry. (B) Titers of serum anti-KLH-specific IgG1, IgG2a, IgG2b, IgG3 and IgM in *E4bp4*-cKI and WT mice. (C) Cells from draining lymph node were restimulated with KLH for three days and supernatant IL-21 was measured by



ELISA. (D) *Il21* and *Bcl6* mRNA expression levels were detected by RT-PCR. (n=5), Data are representative of three independent experiments. Student's *t* test; \*\*\*P<0.001, \*\*P<0.01, \*P<0.05.

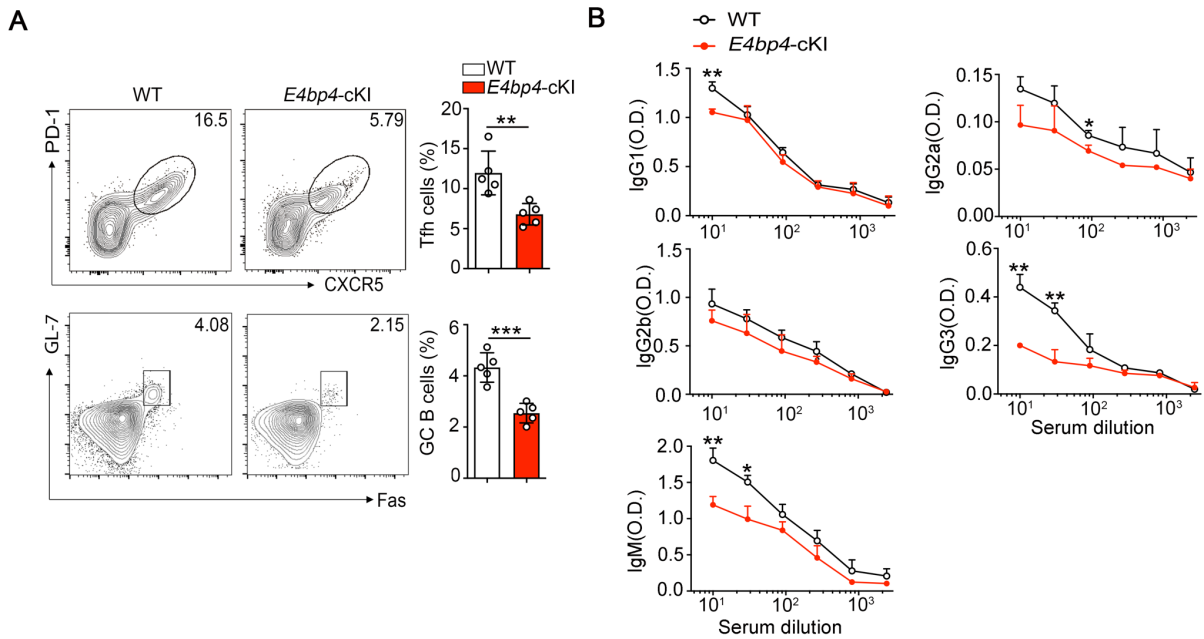

### Supplemental Figure 13. *E4bp4-cKI* mice controls Tfh cell differentiation upon SRBC immunization

The *E4bp4-cKI* and WT mice were immunized with  $2 \times 10^9$  SRBCs and isolated lymphocytes were analyzed after 7 days. (A) Analysis of CD4<sup>+</sup>CXCR5<sup>+</sup>PD-1<sup>+</sup> Tfh cells or B220<sup>+</sup>Fas<sup>+</sup>GL7<sup>+</sup> GC B cells by flow cytometry. (B) Titers of serum anti-SRBC-specific IgG1, IgG2a, IgG2b, IgG3 and IgM in the WT and the *E4bp4-cKI* mice. (n=5). Data are representative of three independent experiments. Student's *t* test; \*\*\*P<0.001, \*\*P<0.01, \*P<0.05.

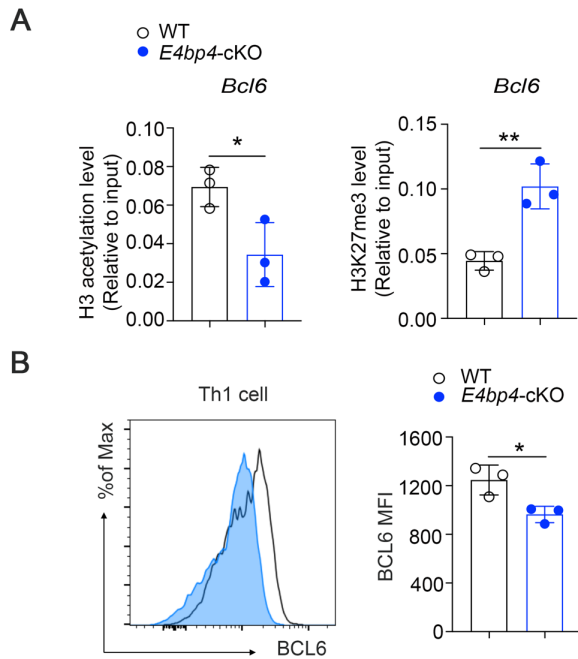

### Supplemental Figure 14. Histone modifications epigenetically regulate *Bcl6* in *E4bp4*-cKO Th1-skewed cells

Naïve CD4<sup>+</sup> T cells were isolated from WT and *E4bp4*-cKO mice, cells were cultured under Th1 skewing condition for 5 days. (A) The H3 acetylation and H3K27 tri-methylation levels in the *Bcl6* promoter region in WT vs. *E4bp4*-cKO mice. (B) Analysis of BCL6 expression in CD4<sup>+</sup>IFN- $\gamma$ <sup>+</sup> Th1 cells by flow cytometry. (n=3). Data are representative of three independent experiments. Student's *t* test, \*P < 0.05, \*\*P < 0.01.

**A**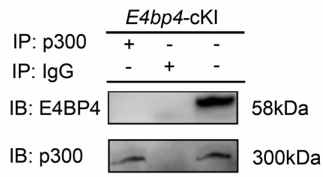**B**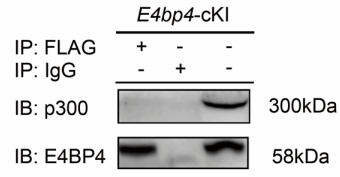

**Supplemental Figure 15. No interaction between E4BP4 and p300 in *E4bp4-cKI* Tfh-like cells**

(A, B) We used anti-FLAG antibody, anti-p300 antibodies for co-immunoprecipitation experiments to analyze the interaction between E4BP4 and p300 in *E4bp4-cKI* Tfh-like cells. Data are representative of three independent experiments.

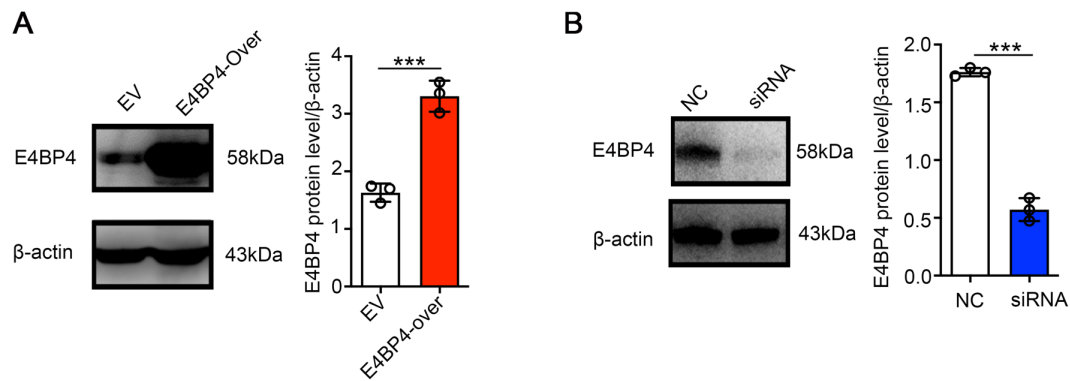

## Supplemental Figure 16. Western blot analysis of E4BP4 expression

(A) Human CD4<sup>+</sup> T cells from healthy donors were transfected with an E4BP4 expression plasmid or empty vector plasmid. The quantification of three independent experiments is shown in the right-hand panel; (B) Human CD4<sup>+</sup> T cells were transfected with an E4BP4 siRNA or negative control (NC). The quantification is shown in the right-hand panel. (n=3). Data are representative of three independent experiments. Student's *t* test; \*\*\*P<0.001.

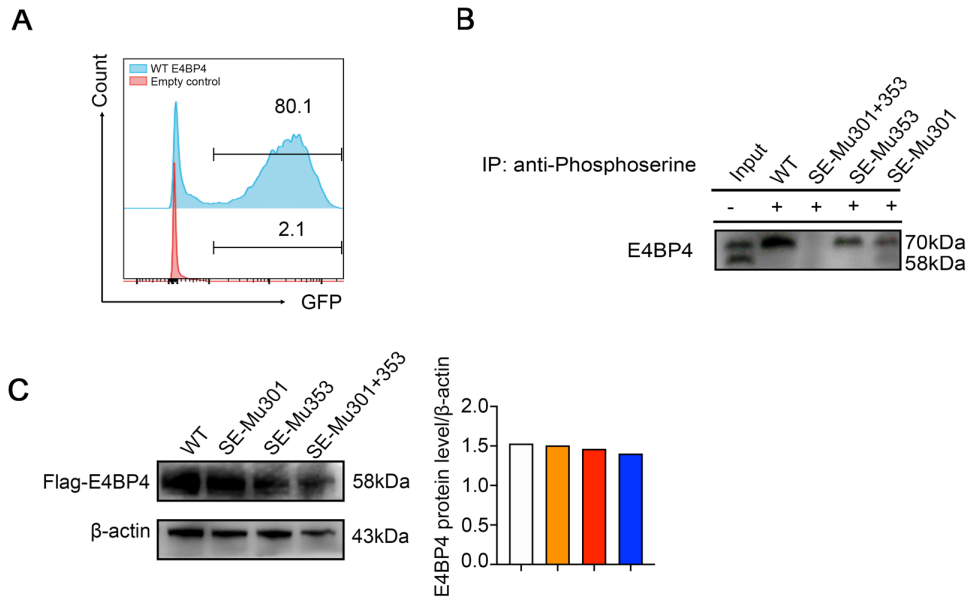

## Supplemental Figure 17. Expression of mutant E4BP4 in human CD4<sup>+</sup> T cells

Isolated human CD4<sup>+</sup> T cells were transfected with E4BP4 phosphor-mutants (wild-type E4BP4 cDNA construct (WT), Ser301 Mutants (SE-Mu301), Ser305 Mutants (SE-Mu305), Ser301 and Ser305 double Mutants (SE-Mu301+353)). (A) GFP expression was analysed by flow cytometry in wild type (WT) E4BP4 and empty control group; (B) CD4<sup>+</sup> T cells from the above groups were then immunoprecipitated with anti-phosphoserine antibody prior to immunoblotting with anti-

E4BP4 antibody. (C) Western blot analysis of total E4BP4 expression in CD4<sup>+</sup> T cells from the above groups. Data are representative of 2-3 independent experiments.

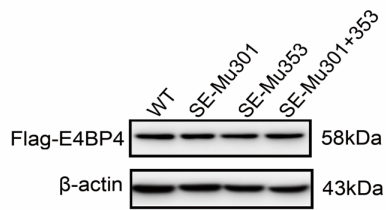

### **Supplemental Figure 18. E4BP4 expression in Jurkat T cells**

Jurkat cells were transfected with the mutant E4BP4 (wild-type E4BP4 cDNA construct (WT), Ser301 Mutants (SE-Mu301), Ser305 Mutants (SE-Mu305), Ser301 and Ser305 double Mutants (SE-Mu301+353). Anti-FLAG antibody was used to detect E4BP4 protein expression in Jurkat cells by western blotting.



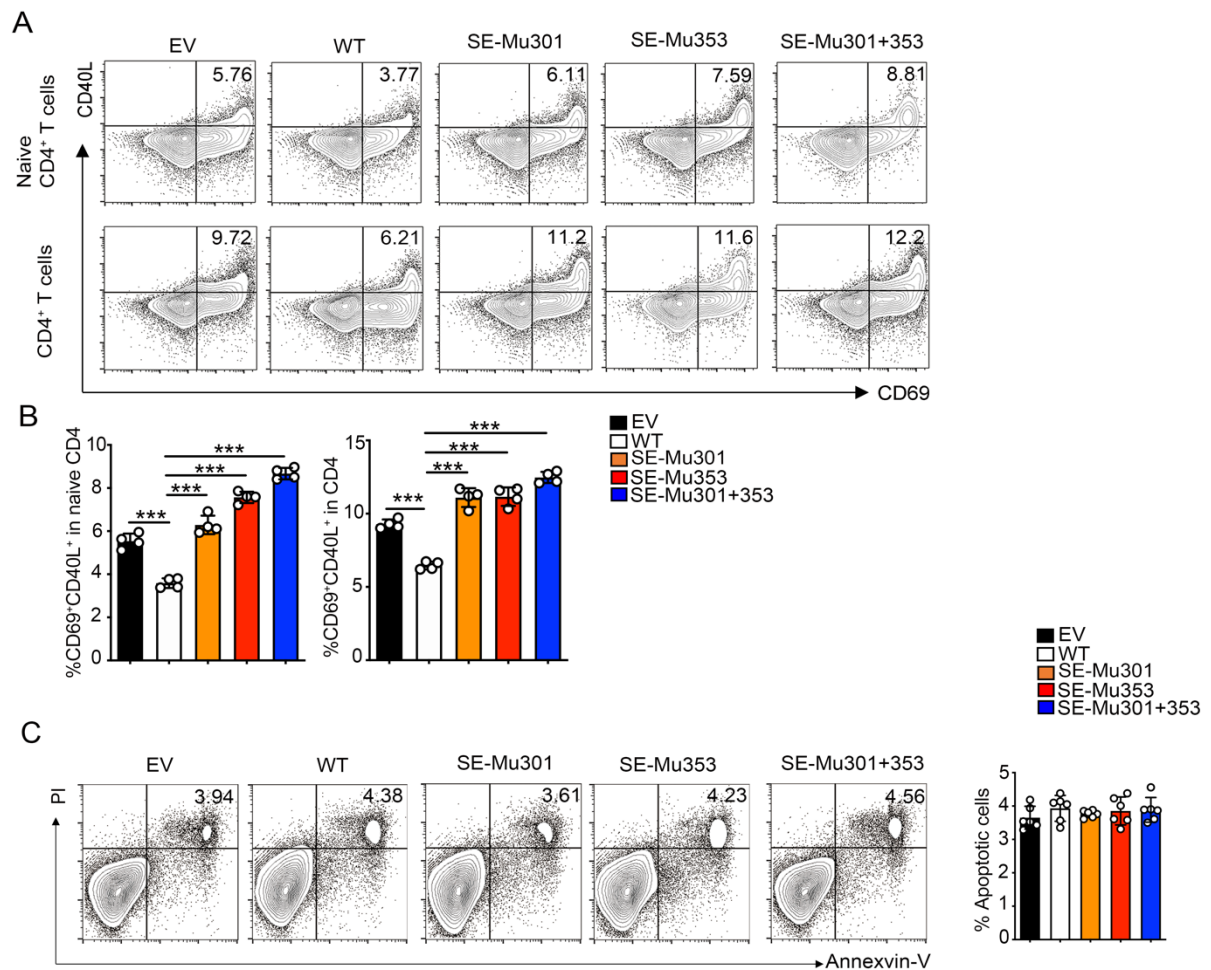

## Supplemental Figure 19. Mutant form of E4BP4 modulate has an altered effect on T cell activation

Naïve CD4<sup>+</sup> T and total CD4<sup>+</sup> T cells were expressed with the mutant version of E4BP4. (A) Analysis of CD4<sup>+</sup>CD69<sup>+</sup>CD40L<sup>+</sup> cells in different groups by flow cytometry; (B) Statistical analysis of (A), (n=4). (C) Analysis of annexin-V and propidium iodide (PI) staining of apoptotic cells in naïve CD4<sup>+</sup> T cells. Percentages of apoptotic cells are shown as (annexin-V-positive, PI-negative cells). (n=6). Data are

representative of three independent experiments. One-way ANOVA with Dunnett's *post hoc* test: \*\*\* $P < 0.001$ .

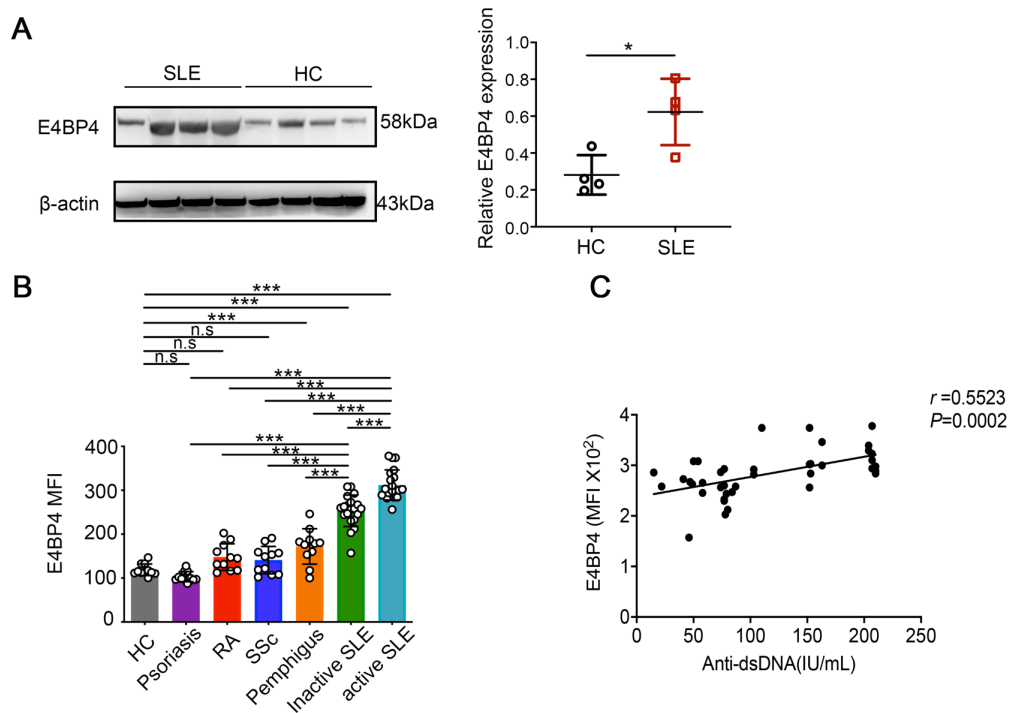

## Supplemental Figure 20. E4BP4 expression is increased in SLE patients

(A) Western blot analysis of anti-E4BP4 and anti- $\beta$ -actin antibodies in SLE and Healthy control (HC) CD4<sup>+</sup> T cells (n=4). Statistical analysis of relative E4BP4 expression to  $\beta$ -actin. (B) E4BP4 MFI in PBMC CD4<sup>+</sup> T cells from healthy controls. (HC, n = 10), Psoriasis (n=10), Rheumatoid arthritis (RA, n=10), Systemic Sclerosis (SSc, n=10), Pemphigus, (n=10), inactive SLE patients (n=20) and active SLE patients (n=20). Dots indicate individual donors. (C) Correlation

between E4BP4 expression level in CXCR5<sup>hi</sup>Tfh-like cells and serum anti-dsDNA levels from SLE patients (n=40). Data are representative of three independent experiments. For (A), Student's *t* test; (B), one-way ANOVA analysis with Dunnett's *post hoc* test; (C), Pearson's correlation coefficient was used for the correlation analysis (two-tailed). \*\*\* $p < 0.001$ , \* $P < 0.05$ . n.s. not significant.

**Supplemental Table 1. Downregulated genes in *E4bp4*-cKO Tfh cells**

| cKO1    | cKO2    | cKO_C1    | cKO_C2    | log2FoldChange | pvalue    | padj      | GENE_NAME     |
|---------|---------|-----------|-----------|----------------|-----------|-----------|---------------|
| 48.8129 | 21.3928 | 3029.9122 | 3426.6637 | -6.543852788   | 2.62E-104 | 2.12E-100 | Nos2          |
| 175.519 | 188.97  | 2486.1264 | 2469.3929 | -3.763876872   | 1.61E-101 | 8.64E-98  | Tph1          |
| 301.186 | 336.046 | 4038.4352 | 4835.1323 | -3.798233482   | 1.07E-95  | 4.30E-92  | Nfil3         |
| 59.1986 | 32.9806 | 1851.1304 | 2413.298  | -5.543931576   | 3.10E-78  | 9.99E-75  | Ptgs2         |
| 1726.11 | 1571.48 | 10057.432 | 10966.543 | -2.672731245   | 4.31E-73  | 1.16E-69  | Ifitm1        |
| 58.1601 | 88.2455 | 1666.9729 | 1149.9444 | -4.260949038   | 4.91E-46  | 9.90E-43  | Procr         |
| 2701.33 | 2044.8  | 19568.473 | 15149.268 | -2.871229075   | 1.39E-42  | 2.50E-39  | Furin         |
| 228.486 | 175.6   | 1519.2994 | 1447.491  | -2.879262016   | 1.75E-41  | 2.82E-38  | Gcnt1         |
| 19.7329 | 18.7187 | 1156.1964 | 558.5096  | -5.481645021   | 4.00E-37  | 5.87E-34  | Il1a          |
| 99.703  | 95.3764 | 787.01275 | 706.06345 | -2.937742063   | 1.97E-35  | 2.45E-32  | Cybb          |
| 156.824 | 139.054 | 951.19091 | 1163.3584 | -2.837747536   | 3.65E-35  | 4.20E-32  | Ltb4r1        |
| 452.818 | 511.646 | 4552.6863 | 2927.9073 | -2.955426533   | 3.77E-33  | 4.06E-30  | Itgb3         |
| 61.2758 | 52.5908 | 507.30182 | 598.75156 | -3.281883313   | 3.69E-31  | 3.72E-28  | 5830417110Rik |
| 51.9286 | 24.067  | 782.66941 | 630.45735 | -4.231206605   | 5.01E-31  | 4.75E-28  | Myadm         |
| 151.632 | 106.073 | 1187.4685 | 892.6398  | -3.017534922   | 1.30E-27  | 9.85E-25  | Cd93          |
| 1298.22 | 1534.05 | 4910.5773 | 5711.9192 | -1.906432135   | 1.34E-27  | 9.85E-25  | Osm           |
| 21.81   | 49.0253 | 566.37121 | 906.05379 | -4.364150885   | 1.09E-26  | 7.32E-24  | Gpr141        |
| 1072.85 | 1447.58 | 5523.8566 | 7117.9488 | -2.325701742   | 2.09E-26  | 1.35E-23  | Padi2         |
| 94.5101 | 61.5044 | 736.63004 | 610.94609 | -3.117560554   | 1.49E-25  | 9.23E-23  | Cd244         |
| 10.3857 | 14.2619 | 285.79161 | 552.41234 | -5.07648813    | 2.89E-25  | 1.73E-22  | Nupr1         |
| 54.0058 | 29.4152 | 1471.5227 | 609.72664 | -4.648970687   | 8.00E-25  | 4.61E-22  | Cd14          |
| 4.15429 | 6.23958 | 300.55895 | 246.32956 | -5.702120636   | 1.09E-24  | 6.06E-22  | Clec7a        |
| 83.0858 | 63.2872 | 508.17048 | 635.33516 | -2.968582651   | 1.97E-24  | 1.06E-21  | Havcr2        |
| 617.951 | 425.183 | 3168.0304 | 2513.2932 | -2.447004924   | 2.44E-24  | 1.27E-21  | Scin          |
| 82.0472 | 63.2872 | 499.48381 | 619.48227 | -2.947427167   | 2.61E-24  | 1.32E-21  | Slc45a3       |
| 27.0029 | 15.1533 | 338.78032 | 317.05785 | -3.974979801   | 5.65E-24  | 2.68E-21  | D330045A20Rik |
| 348.96  | 237.104 | 1981.4306 | 1532.8528 | -2.586794681   | 8.55E-24  | 3.94E-21  | Lat2          |
| 48.8129 | 98.0506 | 851.29414 | 729.23306 | -3.420545425   | 9.54E-24  | 4.27E-21  | Cdh17         |
| 291.839 | 218.385 | 2118.68   | 1376.7628 | -2.778704502   | 1.08E-23  | 4.70E-21  | Col18a1       |
| 30.1186 | 14.2619 | 974.64493 | 403.63904 | -4.970613833   | 2.50E-23  | 1.06E-20  | Slc7a2        |
| 994.952 | 916.327 | 4090.5552 | 3152.2867 | -1.922781033   | 2.63E-23  | 1.09E-20  | Ifitm3        |
| 30.1186 | 22.2842 | 471.68645 | 304.86332 | -3.898346113   | 7.51E-23  | 3.03E-20  | Mmp14         |
| 8.30858 | 13.3705 | 234.54022 | 262.18246 | -4.50148888    | 1.44E-22  | 5.54E-20  | Pla2g7        |
| 1356.38 | 1855.83 | 5866.9803 | 6528.9529 | -1.947594116   | 3.37E-22  | 1.26E-19  | Pim2          |
| 272.106 | 310.196 | 1792.9297 | 1231.6478 | -2.377217338   | 1.18E-21  | 4.22E-19  | Lmna          |
| 1888.12 | 3194.67 | 12798.947 | 15021.226 | -2.452055055   | 1.21E-21  | 4.25E-19  | Lilr4b        |
| 9787.51 | 11127.8 | 26966.914 | 26587.74  | -1.356389953   | 1.60E-21  | 5.48E-19  | Fth1          |
| 775.814 | 826.299 | 2209.8901 | 2353.5448 | -1.509522017   | 3.75E-21  | 1.26E-18  | Nefl          |
| 13.5014 | 31.1979 | 395.24371 | 323.15512 | -3.990206772   | 6.19E-21  | 2.04E-18  | Ly6i          |
| 58.1601 | 38.3289 | 423.90974 | 385.34724 | -3.076360924   | 8.19E-21  | 2.59E-18  | Cd34          |
| 1443.62 | 2378.17 | 8847.3784 | 9999.5169 | -2.301496413   | 1.88E-20  | 5.60E-18  | Lilrb4a       |
| 343.767 | 349.417 | 1092.7837 | 1182.8697 | -1.714267944   | 3.22E-20  | 9.12E-18  | Susd1         |
| 6.23143 | 24.067  | 346.59833 | 362.17762 | -4.52034476    | 3.60E-20  | 1.00E-17  | Gm1045        |

|         |         |           |           |              |          |          |          |
|---------|---------|-----------|-----------|--------------|----------|----------|----------|
| 338.575 | 351.199 | 1084.9657 | 1145.0666 | -1.692151553 | 6.13E-20 | 1.67E-17 | Lrp12    |
| 137.092 | 219.277 | 956.40291 | 1134.0916 | -2.548375044 | 7.70E-20 | 2.04E-17 | Metrlnl  |
| 133.976 | 190.753 | 805.25477 | 806.05862 | -2.307502311 | 1.01E-19 | 2.57E-17 | Rasa4    |
| 1119.58 | 1134.71 | 3045.5482 | 2782.7924 | -1.370706598 | 5.68E-19 | 1.43E-16 | Atp8b4   |
| 574.331 | 655.156 | 2067.4286 | 2960.8326 | -2.030837898 | 7.78E-19 | 1.93E-16 | Tigit    |
| 38.4272 | 38.3289 | 283.1856  | 307.30223 | -2.942786832 | 9.98E-19 | 2.44E-16 | Olr1     |
| 429.969 | 371.701 | 1247.4065 | 1277.987  | -1.65635958  | 1.46E-18 | 3.51E-16 | Tcn2     |
| 210.83  | 146.184 | 1049.3503 | 820.69206 | -2.392864938 | 1.49E-18 | 3.54E-16 | Apobr    |
| 265.875 | 193.427 | 2467.0157 | 1224.3311 | -3.008723799 | 1.92E-18 | 4.48E-16 | Fgl2     |
| 198.367 | 82.8973 | 1830.2824 | 1181.6502 | -3.425246593 | 2.39E-18 | 5.51E-16 | Rnf128   |
| 2.07714 | 1.78274 | 220.64154 | 297.5466  | -7.074107105 | 2.84E-18 | 6.46E-16 | Crisp1   |
| 48.8129 | 47.2425 | 303.16496 | 378.03052 | -2.82480227  | 3.48E-18 | 7.79E-16 | Rasgrp4  |
| 136.053 | 140.836 | 612.41058 | 547.53452 | -2.06722169  | 3.59E-18 | 7.94E-16 | Avil     |
| 97.6258 | 94.4851 | 828.70879 | 501.1953  | -2.793700767 | 3.88E-18 | 8.45E-16 | Sh3pxd2b |
| 19.7329 | 6.23958 | 281.44827 | 248.76847 | -4.379714876 | 4.69E-18 | 9.94E-16 | Clec4n   |
| 464.242 | 705.073 | 2362.7756 | 3121.8004 | -2.228158182 | 5.01E-18 | 1.05E-15 | Rhoq     |
| 1381.3  | 1652.6  | 4160.0486 | 5071.7062 | -1.604736072 | 8.52E-18 | 1.76E-15 | Creb3l2  |
| 64.3915 | 39.2202 | 964.22092 | 421.93084 | -3.748392924 | 2.11E-17 | 4.20E-15 | Anpep    |
| 1777    | 2266.75 | 6157.1152 | 8471.5419 | -1.854523696 | 3.41E-17 | 6.70E-15 | Zbtb32   |
| 3028.48 | 4344.53 | 12079.69  | 15310.236 | -1.893019404 | 3.77E-17 | 7.32E-15 | Grina    |
| 423.738 | 254.931 | 2123.892  | 1557.2418 | -2.441783094 | 3.94E-17 | 7.56E-15 | Aqp9     |
| 266.913 | 250.475 | 1275.2039 | 901.17597 | -2.074461973 | 4.93E-17 | 9.35E-15 | P2ry14   |
| 978.335 | 1009.03 | 2949.9948 | 2468.1734 | -1.447422711 | 7.29E-17 | 1.35E-14 | Glb1     |
| 11.4243 | 9.80506 | 233.67156 | 159.74838 | -4.219507336 | 9.31E-17 | 1.69E-14 | Slc11a1  |
| 110.089 | 75.7663 | 519.46316 | 897.51761 | -2.932134904 | 1.11E-16 | 1.98E-14 | Adssl1   |
| 145.4   | 94.4851 | 612.41058 | 906.05379 | -2.66435556  | 1.29E-16 | 2.29E-14 | Cd68     |
| 6.23143 | 3.56547 | 147.67347 | 196.33198 | -5.152890239 | 1.33E-16 | 2.32E-14 | Ptprg    |
| 446.586 | 491.144 | 1289.9712 | 1491.3914 | -1.567162342 | 1.73E-16 | 2.99E-14 | Unc119   |
| 6.23143 | 11.5878 | 168.52149 | 187.79581 | -4.301398905 | 1.85E-16 | 3.17E-14 | Pdpn     |
| 12.4629 | 2.67411 | 186.76351 | 368.27489 | -5.230678027 | 1.96E-16 | 3.33E-14 | Rhoj     |
| 368.693 | 398.442 | 1165.7518 | 1564.5586 | -1.829917275 | 3.15E-16 | 5.14E-14 | Tm6sf1   |
| 574.331 | 799.558 | 2232.4755 | 2390.1284 | -1.749144648 | 3.23E-16 | 5.21E-14 | Ier3     |
| 1228.63 | 1545.63 | 3958.5178 | 5226.5768 | -1.726435382 | 4.34E-16 | 6.79E-14 | Slc2a3   |
| 114.243 | 114.987 | 562.89654 | 1114.5803 | -2.869629764 | 5.60E-16 | 8.62E-14 | Ltbp3    |
| 1.03857 | 1.78274 | 242.35823 | 226.81831 | -7.351763368 | 5.61E-16 | 8.62E-14 | Vnn3     |
| 384.272 | 188.97  | 2046.5806 | 1592.606  | -2.669097132 | 5.96E-16 | 9.01E-14 | Fcer1g   |
| 330.266 | 538.387 | 1771.213  | 2409.6397 | -2.264959288 | 1.05E-15 | 1.57E-13 | Xdh      |
| 66.4686 | 32.9806 | 510.77649 | 374.37216 | -3.163903102 | 1.12E-15 | 1.66E-13 | Acpp     |
| 1401.03 | 1779.17 | 5125.1382 | 4198.5776 | -1.551657284 | 4.92E-15 | 6.96E-13 | Gem      |
| 15.5786 | 51.6994 | 622.83459 | 389.0056  | -3.899174437 | 5.18E-15 | 7.27E-13 | Slc16a11 |
| 76.8544 | 62.3958 | 504.69581 | 340.22747 | -2.606192102 | 8.38E-15 | 1.16E-12 | Nlrp3    |
| 1189.17 | 1168.58 | 2703.2932 | 2560.8519 | -1.159103297 | 1.35E-14 | 1.83E-12 | Plac8    |
| 82.0472 | 76.6577 | 413.48573 | 340.22747 | -2.250437332 | 1.63E-14 | 2.20E-12 | Tjpl     |
| 210.83  | 353.873 | 1219.6092 | 1991.3672 | -2.504883908 | 1.81E-14 | 2.42E-12 | Ppp1r3b  |
| 179.673 | 312.87  | 1121.4497 | 1147.5055 | -2.200835777 | 2.36E-14 | 3.10E-12 | Nt5e     |

|         |         |           |           |              |          |          |               |
|---------|---------|-----------|-----------|--------------|----------|----------|---------------|
| 141.246 | 118.552 | 487.32246 | 497.53694 | -1.924490415 | 2.36E-14 | 3.10E-12 | Pde4a         |
| 650.146 | 1025.97 | 3057.7096 | 4963.1749 | -2.257624618 | 3.09E-14 | 4.01E-12 | Vps37b        |
| 20.7714 | 19.6101 | 175.47083 | 196.33198 | -3.203004217 | 3.47E-14 | 4.48E-12 | 1500004A13Rik |
| 68.5458 | 43.6771 | 447.36376 | 315.8384  | -2.773560053 | 3.87E-14 | 4.95E-12 | Adora3        |
| 1348.07 | 2451.26 | 7702.4747 | 8089.8531 | -2.054930833 | 4.25E-14 | 5.39E-12 | Dusp5         |
| 10681.7 | 12980.1 | 26906.107 | 27046.254 | -1.189050333 | 5.67E-14 | 7.09E-12 | Srgn          |
| 2.07714 | 8.91369 | 194.58152 | 135.35931 | -4.869725395 | 6.70E-14 | 8.31E-12 | Hamp          |
| 115.282 | 303.065 | 1447.2    | 1682.8455 | -2.900173144 | 7.14E-14 | 8.79E-12 | Adamts14      |
| 516.17  | 362.787 | 1402.0293 | 1810.8881 | -1.870703918 | 7.25E-14 | 8.86E-12 | Pik3cg        |
| 1810.23 | 2178.51 | 5013.9488 | 4583.9249 | -1.26660327  | 7.92E-14 | 9.60E-12 | Cst3          |
| 499.553 | 430.531 | 1210.0538 | 1241.4034 | -1.399011672 | 8.99E-14 | 1.08E-11 | Hexa          |
| 115.282 | 120.335 | 420.43507 | 468.27006 | -1.913642728 | 9.49E-14 | 1.13E-11 | Plekhg3       |
| 2927.74 | 3340.85 | 6865.9479 | 6689.9207 | -1.112544757 | 9.66E-14 | 1.15E-11 | Inpp5b        |
| 273.145 | 341.394 | 905.15153 | 1073.1189 | -1.684246859 | 9.83E-14 | 1.16E-11 | Mir22hg       |
| 4101.32 | 3490.6  | 11552.409 | 8883.7172 | -1.428894621 | 9.94E-14 | 1.16E-11 | Ctsd          |
| 1856.97 | 1781.85 | 3849.0657 | 4522.9522 | -1.201812115 | 1.25E-13 | 1.44E-11 | Tnfrsf1b      |
| 692.728 | 1045.58 | 2723.2726 | 3305.9378 | -1.793128536 | 1.27E-13 | 1.45E-11 | Trem2         |
| 729.078 | 1280.9  | 4246.0467 | 3799.8164 | -2.00035293  | 1.35E-13 | 1.53E-11 | Ndr1          |
| 153.709 | 65.0699 | 751.39738 | 771.91393 | -2.805002868 | 1.61E-13 | 1.79E-11 | Muc13         |
| 9.34715 | 11.5878 | 194.58152 | 128.04259 | -3.943277866 | 1.93E-13 | 2.13E-11 | Meis1         |
| 30.1186 | 30.3065 | 200.66219 | 379.24997 | -3.259153147 | 1.94E-13 | 2.13E-11 | Mirt1         |
| 9.34715 | 12.4792 | 196.31885 | 130.4815  | -3.899697325 | 2.11E-13 | 2.30E-11 | Pbx1          |
| 8.30858 | 1.78274 | 136.3808  | 156.09002 | -4.902033111 | 2.49E-13 | 2.69E-11 | Hcar2         |
| 5036.04 | 5358.02 | 11543.722 | 10217.799 | -1.066097244 | 4.22E-13 | 4.51E-11 | Lif           |
| 116.32  | 56.1562 | 970.30159 | 499.97585 | -3.097570555 | 4.91E-13 | 5.21E-11 | Tbxas1        |
| 182.789 | 164.903 | 630.6526  | 1158.4806 | -2.362268882 | 5.30E-13 | 5.59E-11 | Txk           |
| 573.292 | 708.638 | 1742.547  | 1608.4589 | -1.385669068 | 6.70E-13 | 6.96E-11 | Mgat5         |
| 300.147 | 254.04  | 773.11407 | 845.08112 | -1.546648733 | 6.73E-13 | 6.96E-11 | Acs1          |
| 201.483 | 457.272 | 1716.487  | 2042.5842 | -2.510276874 | 7.18E-13 | 7.37E-11 | Filip1        |
| 77.8929 | 85.5714 | 363.10301 | 323.15512 | -2.069604984 | 9.29E-13 | 9.48E-11 | S100a1        |
| 451.779 | 604.348 | 1474.9974 | 1909.6638 | -1.678433169 | 1.14E-12 | 1.15E-10 | Swap70        |
| 66.4686 | 60.6131 | 336.17432 | 1014.5851 | -3.408785458 | 1.28E-12 | 1.29E-10 | Entpd1        |
| 66.4686 | 48.1339 | 300.55895 | 285.35207 | -2.359487575 | 1.42E-12 | 1.42E-10 | Camk1         |
| 11.4243 | 15.1533 | 152.01681 | 142.67603 | -3.46406733  | 1.51E-12 | 1.49E-10 | Rnf180        |
| 326.112 | 217.494 | 1179.6505 | 907.27324 | -1.943715663 | 1.74E-12 | 1.71E-10 | Emilin1       |
| 25.9643 | 35.6547 | 192.84418 | 291.44933 | -2.965975993 | 1.75E-12 | 1.71E-10 | 4833407H14Rik |
| 174.48  | 82.8973 | 935.55489 | 660.94368 | -2.637989419 | 1.82E-12 | 1.77E-10 | Tal1          |
| 830.858 | 1331.7  | 3808.2383 | 3412.0303 | -1.738676618 | 1.99E-12 | 1.92E-10 | Asb2          |
| 83.0858 | 60.6131 | 414.3544  | 312.18004 | -2.343958154 | 2.13E-12 | 2.05E-10 | Tlr2          |
| 110.089 | 127.466 | 425.64707 | 645.09079 | -2.168673065 | 2.24E-12 | 2.14E-10 | Arhgef40      |
| 18.6943 | 33.872  | 195.45019 | 437.78373 | -3.579630305 | 2.85E-12 | 2.71E-10 | Gzmd          |
| 2.07714 | 8.02232 | 128.56279 | 129.26205 | -4.63450955  | 2.88E-12 | 2.71E-10 | Gm44851       |
| 246.142 | 155.99  | 735.76137 | 842.64222 | -1.975090536 | 2.93E-12 | 2.75E-10 | Cd200r1       |
| 103.857 | 253.149 | 1265.6485 | 1006.049  | -2.666712629 | 3.27E-12 | 3.03E-10 | Selp          |
| 256.527 | 209.472 | 684.50999 | 907.27324 | -1.772161643 | 3.38E-12 | 3.12E-10 | AB124611      |

|         |         |           |           |              |          |          |            |
|---------|---------|-----------|-----------|--------------|----------|----------|------------|
| 3499.99 | 4182.3  | 8739.6637 | 8061.8056 | -1.128882651 | 3.61E-12 | 3.31E-10 | Prdx5      |
| 2398.06 | 3525.36 | 7944.8329 | 9353.2067 | -1.54571926  | 3.87E-12 | 3.51E-10 | Ostf1      |
| 225.37  | 336.046 | 908.6262  | 1138.9694 | -1.863891421 | 4.27E-12 | 3.84E-10 | Frmd4b     |
| 43.62   | 24.067  | 284.05427 | 220.72104 | -2.909829577 | 4.50E-12 | 4.03E-10 | Ptges      |
| 295.993 | 246.018 | 1267.3859 | 809.71698 | -1.940567509 | 4.78E-12 | 4.25E-10 | Hmox1      |
| 36275.3 | 39112.4 | 69471.683 | 73324.506 | -0.9215344   | 4.80E-12 | 4.25E-10 | Actg1      |
| 72.7001 | 29.4152 | 479.50446 | 353.64145 | -3.038247723 | 4.86E-12 | 4.29E-10 | Pla2g4a    |
| 201.483 | 328.915 | 961.61492 | 1512.1221 | -2.218715084 | 4.94E-12 | 4.33E-10 | Sdcbp2     |
| 1585.9  | 1936.05 | 3990.6585 | 5010.7335 | -1.353102968 | 5.16E-12 | 4.50E-10 | Srgap3     |
| 40.5043 | 98.9419 | 436.93975 | 763.37775 | -3.09821505  | 5.32E-12 | 4.62E-10 | Bst1       |
| 33.2343 | 25.8497 | 198.05619 | 191.45417 | -2.726262382 | 5.39E-12 | 4.65E-10 | Clnk       |
| 370.77  | 525.016 | 1417.6654 | 1291.401  | -1.595380144 | 6.17E-12 | 5.29E-10 | Hilpda     |
| 389.465 | 414.486 | 972.90759 | 973.12372 | -1.274876779 | 6.65E-12 | 5.67E-10 | Ptgir      |
| 50.89   | 83.7887 | 710.57001 | 337.78856 | -2.958585386 | 7.35E-12 | 6.20E-10 | Fgfr1      |
| 6.23143 | 2.67411 | 110.32077 | 115.84806 | -4.695607282 | 7.94E-12 | 6.67E-10 | Il27       |
| 1100.89 | 1389.64 | 3348.7132 | 2876.6903 | -1.321518057 | 8.03E-12 | 6.68E-10 | Smim3      |
| 502.669 | 910.087 | 2591.2351 | 2764.5006 | -1.92136362  | 8.04E-12 | 6.68E-10 | Dennd3     |
| 19.7329 | 26.7411 | 162.44082 | 363.39708 | -3.491911488 | 8.27E-12 | 6.84E-10 | Ms4a4a     |
| 934.715 | 1540.29 | 4047.1219 | 4033.9515 | -1.706428132 | 8.41E-12 | 6.92E-10 | Arl4c      |
| 114.243 | 204.123 | 1081.491  | 658.50477 | -2.448601122 | 1.02E-11 | 8.29E-10 | Ly6g       |
| 1.03857 | 8.91369 | 154.62281 | 126.82314 | -4.773836579 | 1.04E-11 | 8.39E-10 | AL589871.1 |
| 3990.2  | 5300.97 | 10782.77  | 12845.721 | -1.346326084 | 1.05E-11 | 8.43E-10 | Gramd1a    |
| 20.7714 | 8.91369 | 304.03362 | 143.89549 | -3.933701652 | 1.07E-11 | 8.53E-10 | Ephx2      |
| 45.6972 | 80.2232 | 317.9323  | 528.02327 | -2.74057735  | 1.15E-11 | 9.16E-10 | Ceacam16   |
| 789.315 | 699.724 | 2254.1921 | 1707.2346 | -1.412890564 | 1.50E-11 | 1.19E-09 | Slc23a2    |
| 43.62   | 28.5238 | 203.26819 | 297.5466  | -2.799244926 | 1.57E-11 | 1.23E-09 | Cpne7      |
| 141.246 | 243.344 | 740.97337 | 1208.4782 | -2.3381163   | 1.59E-11 | 1.25E-09 | Spred3     |
| 8854.87 | 8953.8  | 16079.035 | 16094.344 | -0.853278581 | 1.81E-11 | 1.40E-09 | Ly6e       |
| 20.7714 | 4.45684 | 195.45019 | 204.86815 | -4.01456531  | 2.17E-11 | 1.67E-09 | Lrrc25     |
| 3391.98 | 3786.53 | 7039.6814 | 6963.0782 | -0.963812407 | 2.19E-11 | 1.68E-09 | Pld3       |
| 1045.84 | 1454.71 | 3132.415  | 3603.4844 | -1.428754246 | 2.32E-11 | 1.78E-09 | Rhof       |
| 173.442 | 195.21  | 529.88717 | 699.96618 | -1.735302547 | 2.36E-11 | 1.79E-09 | Pfkfb4     |
| 112.166 | 115.878 | 370.05235 | 491.43967 | -1.914900062 | 2.48E-11 | 1.87E-09 | Soat2      |
| 93.4715 | 38.3289 | 639.33928 | 395.10286 | -2.980359332 | 2.49E-11 | 1.87E-09 | Rab27b     |
| 9.34715 | 24.067  | 251.91357 | 158.52893 | -3.604551768 | 2.53E-11 | 1.89E-09 | AC163354.1 |
| 54.0058 | 36.5461 | 420.43507 | 229.25722 | -2.850491169 | 2.94E-11 | 2.17E-09 | Arhgap6    |
| 28.0415 | 78.4404 | 361.36568 | 702.40509 | -3.311790818 | 3.12E-11 | 2.29E-09 | Prph       |
| 2421.95 | 3138.51 | 6205.7606 | 6825.28   | -1.228266299 | 3.23E-11 | 2.37E-09 | Tes        |
| 115.282 | 57.939  | 465.60578 | 456.07553 | -2.417732999 | 3.29E-11 | 2.40E-09 | Tgm1       |
| 2350.29 | 2973.61 | 6731.3044 | 5797.2809 | -1.2345728   | 3.38E-11 | 2.46E-09 | Cd274      |
| 1573.44 | 1523.35 | 3140.233  | 3972.9788 | -1.199267699 | 4.09E-11 | 2.95E-09 | Hip1r      |
| 110.089 | 50.808  | 464.73711 | 463.39225 | -2.534648327 | 4.37E-11 | 3.12E-09 | Cnr2       |
| 1783.23 | 1882.57 | 3493.7807 | 3574.2176 | -0.946935045 | 4.68E-11 | 3.32E-09 | Ubash3b    |
| 28.0415 | 89.1369 | 511.64515 | 481.68405 | -3.075369425 | 4.74E-11 | 3.35E-09 | Acvrl1     |
| 1779.07 | 1865.63 | 3442.5293 | 3672.9933 | -0.964808298 | 4.78E-11 | 3.37E-09 | Rnf157     |



|         |         |           |           |              |          |          |          |
|---------|---------|-----------|-----------|--------------|----------|----------|----------|
| 681.304 | 378.832 | 1838.9691 | 3292.5239 | -2.275620726 | 4.93E-11 | 3.46E-09 | Cd55     |
| 544.212 | 755.881 | 1677.3969 | 2027.9508 | -1.509446947 | 5.05E-11 | 3.53E-09 | Klrk1    |
| 3.11572 | 1.78274 | 195.45019 | 75.606103 | -5.815641619 | 5.24E-11 | 3.64E-09 | Tpsg1    |
| 18.6943 | 48.1339 | 236.27756 | 575.58195 | -3.591885551 | 5.45E-11 | 3.78E-09 | Hapln4   |
| 326.112 | 410.03  | 1074.5417 | 931.66231 | -1.445849929 | 5.65E-11 | 3.88E-09 | Itga5    |
| 3539.45 | 4319.57 | 8168.0805 | 9848.3047 | -1.196556383 | 5.75E-11 | 3.93E-09 | Tmem123  |
| 1042.73 | 1567.92 | 3534.608  | 3807.1331 | -1.490962402 | 5.84E-11 | 3.98E-09 | Arrb1    |
| 1116.47 | 1308.53 | 2785.8167 | 2524.2683 | -1.130608603 | 5.89E-11 | 3.99E-09 | Fndc3a   |
| 1207.86 | 1770.26 | 3894.2364 | 4147.3606 | -1.432417193 | 6.48E-11 | 4.37E-09 | Neurl3   |
| 1607.71 | 1705.19 | 3178.4544 | 3607.1428 | -1.033831531 | 6.66E-11 | 4.48E-09 | Crip1    |
| 2875.81 | 3101.96 | 5544.7046 | 5846.059  | -0.929927116 | 6.74E-11 | 4.51E-09 | Itm2c    |
| 10.3857 | 2.67411 | 154.62281 | 109.7508  | -4.376106645 | 7.07E-11 | 4.67E-09 | F10      |
| 65.4301 | 57.0476 | 260.60025 | 254.86574 | -2.075745602 | 1.11E-10 | 7.25E-09 | Aldh11l  |
| 22.8486 | 22.2842 | 165.91549 | 146.33439 | -2.792391942 | 1.27E-10 | 8.17E-09 | Col5a1   |
| 311.572 | 286.129 | 768.77073 | 719.47744 | -1.317416882 | 1.38E-10 | 8.81E-09 | Gla      |
| 1108.16 | 1230.09 | 2320.2109 | 2442.5649 | -1.02577061  | 1.38E-10 | 8.82E-09 | Lrrc8d   |
| 1371.95 | 1663.29 | 3156.7377 | 3468.1251 | -1.125383228 | 1.48E-10 | 9.36E-09 | Zfp219   |
| 165.133 | 150.641 | 472.55512 | 758.49994 | -1.961362056 | 1.75E-10 | 1.10E-08 | Lzts2    |
| 78.9315 | 158.664 | 539.44251 | 612.16555 | -2.271940048 | 1.82E-10 | 1.14E-08 | Fut4     |
| 502.669 | 793.318 | 1846.7871 | 2120.6293 | -1.612692233 | 2.11E-10 | 1.31E-08 | Fam46a   |
| 675.072 | 528.582 | 1588.7928 | 1399.9324 | -1.313657446 | 2.37E-10 | 1.46E-08 | Ints6l   |
| 1469.58 | 1506.41 | 3655.3528 | 7082.5847 | -1.850885896 | 2.65E-10 | 1.61E-08 | Irf8     |
| 1005.34 | 1211.37 | 2353.2202 | 2916.9322 | -1.248403762 | 2.71E-10 | 1.64E-08 | Net1     |
| 1491.39 | 2191.88 | 4811.5493 | 4708.3091 | -1.369499942 | 2.85E-10 | 1.71E-08 | Coro2a   |
| 98.6644 | 144.402 | 415.22306 | 592.65429 | -2.046994629 | 3.01E-10 | 1.80E-08 | Sema4c   |
| 96.5872 | 93.5937 | 509.90782 | 317.05785 | -2.123552659 | 3.08E-10 | 1.83E-08 | F2rl2    |
| 35.3115 | 21.3928 | 165.04682 | 247.54902 | -2.86840926  | 3.23E-10 | 1.91E-08 | Pkib     |
| 63.3529 | 41.003  | 334.43699 | 232.91558 | -2.450600221 | 3.32E-10 | 1.95E-08 | Nrp2     |
| 109.05  | 172.926 | 502.95848 | 918.24832 | -2.329354673 | 3.35E-10 | 1.96E-08 | Arhgef25 |
| 845.398 | 861.062 | 1720.8303 | 2134.0432 | -1.174760582 | 3.61E-10 | 2.10E-08 | Tex2     |
| 6171.2  | 7780.76 | 15212.105 | 22284.289 | -1.426112659 | 4.00E-10 | 2.31E-08 | Pim1     |
| 19.7329 | 78.4404 | 533.36184 | 421.93084 | -3.273929    | 4.18E-10 | 2.41E-08 | Scarf2   |
| 94.5101 | 39.2202 | 1711.275  | 996.29333 | -4.342567321 | 4.34E-10 | 2.49E-08 | Gpmb     |
| 77.8929 | 62.3958 | 264.94359 | 453.63662 | -2.356080026 | 4.71E-10 | 2.69E-08 | H2-Oa    |
| 501.63  | 573.15  | 1222.2152 | 1164.5779 | -1.15057442  | 4.96E-10 | 2.83E-08 | Dusp16   |
| 1174.63 | 1479.67 | 2817.0887 | 3296.1822 | -1.202746254 | 5.32E-10 | 2.98E-08 | Bcl2l11  |
| 4452.36 | 4169.82 | 7655.5666 | 8591.0484 | -0.913918802 | 5.89E-10 | 3.26E-08 | Itgb7    |
| 2541.39 | 2707.09 | 4791.5699 | 4761.9651 | -0.864019787 | 6.63E-10 | 3.65E-08 | Trpv2    |
| 8083.21 | 8408.28 | 15925.281 | 14256.628 | -0.872032993 | 6.67E-10 | 3.66E-08 | Psap     |
| 28.0415 | 17.8274 | 198.05619 | 141.45658 | -2.899024444 | 7.40E-10 | 4.04E-08 | Cxcl16   |
| 187.982 | 93.5937 | 654.10662 | 595.0932  | -2.153857723 | 8.47E-10 | 4.58E-08 | Lyn      |
| 135.014 | 322.675 | 1093.6524 | 1124.3359 | -2.273955782 | 8.49E-10 | 4.58E-08 | Lmtk3    |
| 2354.44 | 3387.2  | 6873.7659 | 10321.453 | -1.582079315 | 8.67E-10 | 4.65E-08 | Ctla4    |
| 1309.64 | 1949.42 | 4295.5608 | 4093.7047 | -1.363614678 | 8.67E-10 | 4.65E-08 | Crem     |
| 15.5786 | 28.5238 | 191.97552 | 147.55385 | -2.935905915 | 9.22E-10 | 4.92E-08 | Epas1    |

|         |         |           |           |              |          |          |               |
|---------|---------|-----------|-----------|--------------|----------|----------|---------------|
| 19.7329 | 14.2619 | 113.79544 | 252.42683 | -3.43086908  | 9.35E-10 | 4.97E-08 | Copz2         |
| 754.004 | 815.602 | 1551.4401 | 1786.4991 | -1.087497386 | 9.98E-10 | 5.28E-08 | Snx18         |
| 485.013 | 786.187 | 1778.1624 | 2116.9709 | -1.613977941 | 1.01E-09 | 5.32E-08 | Vegfa         |
| 84.1244 | 44.5684 | 568.97721 | 286.57152 | -2.739982368 | 1.13E-09 | 5.89E-08 | P2rx1         |
| 4.15429 | 0.89137 | 130.30012 | 71.947744 | -5.379296353 | 1.14E-09 | 5.90E-08 | Msr1          |
| 71.6615 | 35.6547 | 537.70518 | 257.30464 | -2.897012504 | 1.26E-09 | 6.52E-08 | I830077J02Rik |
| 166.172 | 150.641 | 425.64707 | 482.9035  | -1.519718283 | 1.30E-09 | 6.69E-08 | Phldb3        |
| 6.23143 | 9.80506 | 110.32077 | 93.897903 | -3.659701386 | 1.50E-09 | 7.63E-08 | Plau          |
| 2678.48 | 3429.1  | 6232.6893 | 6743.5766 | -1.086833791 | 1.71E-09 | 8.67E-08 | Cyth4         |
| 899.404 | 913.653 | 1710.4063 | 1871.8608 | -0.981870051 | 1.73E-09 | 8.70E-08 | Fuca2         |
| 633.529 | 730.031 | 1486.2901 | 1401.1518 | -1.082060715 | 1.81E-09 | 9.11E-08 | Snap23        |
| 78.9315 | 149.75  | 447.36376 | 1086.5329 | -2.741596579 | 1.89E-09 | 9.44E-08 | Fasl          |
| 19.7329 | 26.7411 | 135.51213 | 176.82073 | -2.740165778 | 1.93E-09 | 9.62E-08 | Sh3tc1        |
| 289.762 | 434.988 | 1181.3878 | 978.00153 | -1.57402502  | 1.96E-09 | 9.74E-08 | Ifi209        |
| 6.23143 | 0       | 96.422092 | 117.06751 | -5.168520691 | 2.01E-09 | 9.95E-08 | Mmp8          |
| 75.8158 | 61.5044 | 244.09557 | 304.86332 | -1.999795877 | 2.11E-09 | 1.04E-07 | Gm13012       |
| 12.4629 | 4.45684 | 239.75223 | 85.36173  | -4.288001896 | 2.40E-09 | 1.17E-07 | Cd33          |
| 61.2758 | 16.936  | 370.92102 | 310.96059 | -3.135408221 | 2.56E-09 | 1.24E-07 | Rusc2         |
| 569.138 | 607.022 | 1176.1758 | 1340.1792 | -1.096076771 | 2.61E-09 | 1.26E-07 | Card19        |
| 63.3529 | 60.6131 | 231.06555 | 486.56186 | -2.530571338 | 2.68E-09 | 1.29E-07 | Cd38          |
| 711.422 | 1028.64 | 2961.2875 | 2092.5818 | -1.538107429 | 2.91E-09 | 1.38E-07 | Itpripl2      |
| 171.364 | 256.714 | 621.09726 | 728.01361 | -1.652681468 | 2.91E-09 | 1.38E-07 | Mcf2l         |
| 18.6943 | 19.6101 | 142.46147 | 121.94533 | -2.787883126 | 2.96E-09 | 1.40E-07 | Myof          |
| 46.7358 | 37.4375 | 182.42017 | 442.66154 | -2.891623472 | 2.97E-09 | 1.40E-07 | Fam114a1      |
| 54.0058 | 57.0476 | 719.25669 | 219.50159 | -3.081459929 | 3.10E-09 | 1.46E-07 | Illrn         |
| 1589.02 | 2465.53 | 6787.7678 | 4949.7609 | -1.533378855 | 3.12E-09 | 1.46E-07 | Adam8         |
| 2.07714 | 1.78274 | 91.210087 | 73.167197 | -5.420936818 | 3.22E-09 | 1.50E-07 | Creb5         |
| 2.07714 | 0       | 141.5928  | 85.36173  | -6.874179737 | 3.28E-09 | 1.53E-07 | Wfdc17        |
| 588.871 | 865.519 | 1861.5544 | 3265.6959 | -1.81656467  | 3.43E-09 | 1.59E-07 | Abcb9         |
| 1039.61 | 1195.33 | 2242.0308 | 2169.4074 | -0.980668229 | 3.58E-09 | 1.66E-07 | Nfkbiz        |
| 90.3558 | 37.4375 | 464.73711 | 321.93567 | -2.630057128 | 3.75E-09 | 1.73E-07 | Cd63-ps       |
| 74.7772 | 161.338 | 502.08981 | 619.48227 | -2.242741236 | 3.84E-09 | 1.77E-07 | Gm13546       |
| 498.515 | 806.689 | 1880.6651 | 1831.6188 | -1.506888421 | 3.88E-09 | 1.78E-07 | Klrc1         |
| 299.109 | 355.656 | 749.66005 | 938.97903 | -1.364419793 | 4.09E-09 | 1.87E-07 | Paqr7         |
| 87.2401 | 50.808  | 295.34695 | 307.30223 | -2.1318052   | 4.43E-09 | 2.02E-07 | Renbp         |
| 2854    | 2689.26 | 4801.1252 | 5257.0631 | -0.859451934 | 4.48E-09 | 2.03E-07 | Id2           |
| 1168.39 | 1322.79 | 2348.0082 | 2482.8069 | -0.954792543 | 4.49E-09 | 2.03E-07 | Gba           |
| 52.9672 | 31.1979 | 272.76159 | 193.89307 | -2.480328334 | 4.68E-09 | 2.11E-07 | Nlrp6         |
| 116.32  | 127.466 | 418.69773 | 340.22747 | -1.639316859 | 4.71E-09 | 2.12E-07 | Matk          |
| 2805.18 | 1567.03 | 7508.7618 | 6036.2937 | -1.631806913 | 5.06E-09 | 2.27E-07 | Serpina3g     |
| 23.8872 | 20.5015 | 126.82545 | 154.87057 | -2.666789082 | 5.18E-09 | 2.31E-07 | Cd72          |
| 387.388 | 399.333 | 860.84949 | 1203.6004 | -1.390150255 | 5.25E-09 | 2.34E-07 | Lrrk1         |
| 6667.63 | 7270    | 11891.189 | 12522.566 | -0.808578889 | 5.44E-09 | 2.41E-07 | Btg1          |
| 32.1957 | 84.68   | 304.90229 | 523.14546 | -2.816404533 | 5.59E-09 | 2.47E-07 | Adh1          |
| 16.6172 | 32.9806 | 150.27948 | 208.52651 | -2.841819412 | 5.61E-09 | 2.47E-07 | Gzme          |

|         |         |           |           |              |          |          |           |
|---------|---------|-----------|-----------|--------------|----------|----------|-----------|
| 900.442 | 728.248 | 2370.5936 | 1725.5264 | -1.331867836 | 6.04E-09 | 2.65E-07 | Litaf     |
| 18.6943 | 9.80506 | 131.16879 | 115.84806 | -3.130636914 | 6.56E-09 | 2.86E-07 | Cacng8    |
| 948.217 | 1278.22 | 2400.1283 | 2940.1019 | -1.261123379 | 6.81E-09 | 2.96E-07 | Zkscan3   |
| 84.1244 | 85.5714 | 337.04299 | 260.963   | -1.819469449 | 7.06E-09 | 3.06E-07 | Arhgef10l |
| 31.1572 | 9.80506 | 211.0862  | 167.0651  | -3.223936151 | 7.32E-09 | 3.17E-07 | Cdk18     |
| 0       | 0       | 73.836737 | 108.53134 | -9.006007156 | 7.81E-09 | 3.37E-07 | Fpr2      |
| 34.2729 | 8.91369 | 317.9323  | 170.72346 | -3.516826128 | 8.32E-09 | 3.57E-07 | Hbb-bt    |
| 687.535 | 462.62  | 1452.4121 | 1527.975  | -1.374809412 | 8.33E-09 | 3.57E-07 | Gab2      |
| 14.54   | 1.78274 | 155.49148 | 129.26205 | -4.159772947 | 8.81E-09 | 3.75E-07 | Pkd21l    |
| 9257.83 | 14920.6 | 29191.571 | 48004.998 | -1.674726196 | 1.03E-08 | 4.32E-07 | Tnfrsf9   |
| 552.521 | 617.718 | 1210.9225 | 1176.7724 | -1.028379867 | 1.03E-08 | 4.32E-07 | P2rx4     |
| 328.189 | 186.296 | 954.66558 | 792.64463 | -1.766960477 | 1.06E-08 | 4.44E-07 | Tec       |
| 410.236 | 497.384 | 968.56426 | 1136.5305 | -1.211811845 | 1.21E-08 | 5.06E-07 | Sytl3     |
| 119.436 | 41.003  | 705.35801 | 401.20013 | -2.792508634 | 1.26E-08 | 5.23E-07 | Gas7      |
| 41.5429 | 20.5015 | 178.9455  | 197.55143 | -2.610784733 | 1.31E-08 | 5.41E-07 | Grk3      |
| 261.72  | 231.756 | 760.95273 | 570.70414 | -1.434834305 | 1.31E-08 | 5.41E-07 | Vcl       |
| 2852.96 | 2750.76 | 7745.0394 | 5294.8661 | -1.218838171 | 1.35E-08 | 5.59E-07 | Ero1l     |
| 3097.02 | 4129.71 | 7898.7935 | 13996.885 | -1.59895309  | 1.50E-08 | 6.14E-07 | Cblb      |
| 17.6557 | 41.003  | 163.30949 | 308.52168 | -2.995534825 | 1.56E-08 | 6.37E-07 | Eml1      |
| 19957.2 | 30636.3 | 61040.396 | 59373.961 | -1.250947201 | 1.57E-08 | 6.41E-07 | Gzmb      |
| 62.3143 | 32.9806 | 278.84227 | 215.84323 | -2.385102465 | 1.58E-08 | 6.41E-07 | Tmem51    |
| 1980.56 | 2163.35 | 5520.3819 | 3910.7867 | -1.186772829 | 1.59E-08 | 6.41E-07 | Gsn       |
| 235.756 | 416.269 | 952.05957 | 1260.9147 | -1.760397402 | 1.59E-08 | 6.41E-07 | Rhoc      |
| 462.165 | 508.972 | 1027.6336 | 981.65989 | -1.048683197 | 1.68E-08 | 6.74E-07 | Ern1      |
| 142.284 | 189.862 | 458.65644 | 788.98627 | -1.905670109 | 1.70E-08 | 6.77E-07 | Zcchc24   |
| 51.9286 | 36.5461 | 198.92486 | 193.89307 | -2.156115162 | 1.80E-08 | 7.15E-07 | Wipi1     |
| 3756.52 | 4477.34 | 7446.2178 | 8708.1159 | -0.971952289 | 1.85E-08 | 7.31E-07 | Gpx4      |
| 326.112 | 489.361 | 1045.8757 | 1847.4717 | -1.825044284 | 1.88E-08 | 7.41E-07 | Aldoc     |
| 1943.17 | 2413.83 | 4329.4388 | 4219.3084 | -0.972069572 | 1.93E-08 | 7.57E-07 | Nedd4     |
| 84.1244 | 114.987 | 315.3263  | 342.66637 | -1.72033182  | 1.99E-08 | 7.74E-07 | Lzts1     |
| 462.165 | 376.158 | 1319.5059 | 924.34559 | -1.422538882 | 2.00E-08 | 7.75E-07 | Rab31     |
| 628.336 | 926.132 | 1815.5151 | 2677.9194 | -1.530061733 | 2.02E-08 | 7.82E-07 | Arhgef10  |
| 25.9643 | 27.6324 | 125.95679 | 199.99034 | -2.599377708 | 2.06E-08 | 7.96E-07 | Slc30a2   |
| 1361.57 | 1563.46 | 2949.1261 | 4658.3115 | -1.378270779 | 2.10E-08 | 8.09E-07 | Gimap7    |
| 410.236 | 218.385 | 1177.0445 | 976.78208 | -1.779186567 | 2.12E-08 | 8.12E-07 | Dmxl2     |
| 14.54   | 8.02232 | 136.3808  | 89.020089 | -3.337187887 | 2.24E-08 | 8.60E-07 | Aoah      |
| 105.934 | 139.054 | 407.40506 | 349.98309 | -1.626948084 | 2.30E-08 | 8.75E-07 | C1qtnf6   |
| 37.3886 | 47.2425 | 211.95487 | 169.50401 | -2.170990389 | 2.56E-08 | 9.69E-07 | Psd3      |
| 31.1572 | 39.2202 | 147.67347 | 293.88824 | -2.642615544 | 2.57E-08 | 9.70E-07 | Lhfp12    |
| 536.942 | 559.78  | 1051.9563 | 1186.528  | -1.028234359 | 2.61E-08 | 9.82E-07 | Unc93b1   |
| 3039.9  | 3650.15 | 6129.3178 | 7580.1216 | -1.034669986 | 2.65E-08 | 9.95E-07 | Atp11b    |
| 682.342 | 1080.34 | 2188.1734 | 2414.5175 | -1.383617916 | 2.65E-08 | 9.95E-07 | Mctp2     |
| 109.05  | 66.8526 | 317.06364 | 339.00801 | -1.903408052 | 2.78E-08 | 1.04E-06 | Zfp516    |
| 2538.27 | 3039.57 | 5148.5922 | 6516.7583 | -1.063968963 | 2.81E-08 | 1.04E-06 | Hmgcs1    |
| 1800.88 | 2066.19 | 3640.5855 | 5042.4393 | -1.166330914 | 2.82E-08 | 1.04E-06 | Ugcg      |

|         |         |           |           |              |          |          |            |
|---------|---------|-----------|-----------|--------------|----------|----------|------------|
| 57.1215 | 82.0059 | 242.35823 | 703.62454 | -2.760928879 | 3.04E-08 | 1.12E-06 | Hao        |
| 44.6586 | 20.5015 | 284.92294 | 165.84565 | -2.802001969 | 3.05E-08 | 1.12E-06 | Hgfac      |
| 25.9643 | 13.3705 | 207.61153 | 114.62861 | -3.048313183 | 3.20E-08 | 1.18E-06 | Pilrb2     |
| 816.318 | 1067.86 | 1927.5732 | 2225.5022 | -1.139085764 | 3.35E-08 | 1.22E-06 | Rasa3      |
| 412.313 | 205.015 | 7072.6907 | 3143.7506 | -4.049229582 | 3.46E-08 | 1.26E-06 | Thbs1      |
| 122.552 | 73.9836 | 367.44635 | 343.88583 | -1.860782445 | 3.80E-08 | 1.38E-06 | Lair1      |
| 8.30858 | 14.2619 | 124.21945 | 87.800636 | -3.222851124 | 4.43E-08 | 1.59E-06 | Cacna1h    |
| 683.381 | 738.053 | 1324.7179 | 1581.6309 | -1.030608688 | 4.44E-08 | 1.59E-06 | Spty2d1    |
| 535.903 | 617.718 | 1125.7931 | 1295.0594 | -1.067832028 | 4.56E-08 | 1.62E-06 | Trio       |
| 81.0086 | 96.2678 | 260.60025 | 324.37457 | -1.718232898 | 5.10E-08 | 1.80E-06 | Ebi3       |
| 1308.6  | 1093.71 | 2265.4848 | 2341.3503 | -0.939768914 | 5.72E-08 | 1.99E-06 | Ctla2a     |
| 68.5458 | 43.6771 | 218.90421 | 241.45175 | -2.041179761 | 5.80E-08 | 2.01E-06 | Rab11fip5  |
| 869.285 | 656.939 | 1586.1868 | 1756.0127 | -1.131369016 | 6.10E-08 | 2.11E-06 | Rnf130     |
| 72.7001 | 188.97  | 542.04852 | 778.01119 | -2.330085763 | 6.36E-08 | 2.19E-06 | Syt12      |
| 18.6943 | 28.5238 | 114.66411 | 248.76847 | -2.934280741 | 6.58E-08 | 2.26E-06 | Rcn3       |
| 10579.9 | 10085.8 | 16479.491 | 17639.392 | -0.723297033 | 6.86E-08 | 2.34E-06 | Fxyd5      |
| 40.5043 | 16.0446 | 170.25883 | 204.86815 | -2.740529996 | 7.07E-08 | 2.40E-06 | Erg        |
| 19.7329 | 8.02232 | 149.41081 | 102.43408 | -3.200762278 | 7.15E-08 | 2.42E-06 | Tbc1d9     |
| 8.30858 | 3.56547 | 193.71285 | 53.655944 | -4.403617301 | 7.86E-08 | 2.64E-06 | Lilra6     |
| 645.992 | 797.775 | 1450.6747 | 1488.9525 | -1.024797526 | 7.88E-08 | 2.64E-06 | Plcg2      |
| 204.599 | 306.631 | 706.22667 | 679.23548 | -1.436209083 | 7.91E-08 | 2.64E-06 | Klk8       |
| 2217.35 | 3480.79 | 6317.8187 | 8352.0355 | -1.363870201 | 8.06E-08 | 2.68E-06 | Birc2      |
| 12.4629 | 10.6964 | 92.078754 | 95.117356 | -3.018232673 | 8.24E-08 | 2.72E-06 | Adamts11   |
| 104.896 | 146.184 | 997.23028 | 362.17762 | -2.437203962 | 8.55E-08 | 2.82E-06 | Oasl2      |
| 384.272 | 409.138 | 796.56809 | 1048.7298 | -1.215829699 | 8.59E-08 | 2.83E-06 | Naga       |
| 22646.1 | 21743.2 | 35636.215 | 41952.851 | -0.805604181 | 9.21E-08 | 3.00E-06 | Rps3a1     |
| 244.065 | 122.118 | 1083.2284 | 570.70414 | -2.178840149 | 9.42E-08 | 3.06E-06 | Prkar2b    |
| 514.093 | 620.393 | 1130.1364 | 1467.0023 | -1.193095031 | 9.52E-08 | 3.09E-06 | Agrn       |
| 95.5487 | 47.2425 | 316.19497 | 301.20496 | -2.118828476 | 9.83E-08 | 3.18E-06 | Hhex       |
| 3111.56 | 3802.58 | 6176.2259 | 6850.8885 | -0.913536036 | 9.87E-08 | 3.18E-06 | Tmem30a    |
| 140.207 | 137.271 | 362.23435 | 356.08036 | -1.372682801 | 1.01E-07 | 3.26E-06 | Tmem158    |
| 28.0415 | 13.3705 | 158.09748 | 124.38423 | -2.784109011 | 1.02E-07 | 3.28E-06 | Hs6st2     |
| 66.4686 | 128.357 | 377.87036 | 381.68888 | -1.957900815 | 1.02E-07 | 3.28E-06 | Slc41a2    |
| 566.022 | 646.242 | 1149.2471 | 1313.3512 | -1.021044707 | 1.03E-07 | 3.31E-06 | AC153368.1 |
| 398.812 | 630.198 | 1825.9391 | 1231.6478 | -1.570824851 | 1.04E-07 | 3.31E-06 | Ntrk3      |
| 157.863 | 236.213 | 512.51382 | 718.25798 | -1.639208017 | 1.11E-07 | 3.52E-06 | Trib3      |
| 1910.97 | 2301.51 | 3763.9363 | 4282.7199 | -0.933130096 | 1.12E-07 | 3.54E-06 | Chsy1      |
| 23697.1 | 27871.3 | 49424.574 | 43510.093 | -0.849730227 | 1.17E-07 | 3.69E-06 | B2m        |
| 679.226 | 537.495 | 1525.3801 | 1217.0144 | -1.174170111 | 1.26E-07 | 3.94E-06 | Pdlim5     |
| 18.6943 | 15.1533 | 337.91166 | 79.264463 | -3.629858239 | 1.29E-07 | 4.04E-06 | Cxcl3      |
| 902.519 | 804.015 | 1779.8997 | 1538.95   | -0.96076398  | 1.32E-07 | 4.10E-06 | Gns        |
| 8.30858 | 17.8274 | 106.8461  | 108.53134 | -3.027303499 | 1.35E-07 | 4.21E-06 | Il12a      |
| 359.346 | 417.161 | 788.75009 | 852.39784 | -1.078045956 | 1.45E-07 | 4.46E-06 | Acsbg1     |
| 180.712 | 201.449 | 1068.461  | 473.14787 | -2.013612803 | 1.45E-07 | 4.46E-06 | Kit        |
| 254.45  | 548.192 | 1251.7499 | 1620.6534 | -1.837413624 | 1.45E-07 | 4.46E-06 | Galc       |

|         |         |           |           |              |          |          |         |
|---------|---------|-----------|-----------|--------------|----------|----------|---------|
| 3469.87 | 3733.94 | 5975.5637 | 5959.4682 | -0.728259329 | 1.46E-07 | 4.48E-06 | Tspo    |
| 5.19286 | 8.91369 | 67.756065 | 101.21462 | -3.564759454 | 1.47E-07 | 4.50E-06 | Prss12  |
| 1365.72 | 1633.88 | 2692.8692 | 3033.9998 | -0.93221017  | 1.49E-07 | 4.56E-06 | Msmo1   |
| 163.056 | 114.987 | 382.2137  | 426.80865 | -1.543030577 | 1.50E-07 | 4.57E-06 | H2-DMb1 |
| 6.23143 | 8.91369 | 68.624732 | 98.775716 | -3.453509421 | 1.57E-07 | 4.77E-06 | Gm13522 |
| 1782.19 | 1774.72 | 3008.1955 | 3735.1854 | -0.922309715 | 1.60E-07 | 4.85E-06 | Gm15500 |
| 40.5043 | 59.7217 | 174.60217 | 517.04819 | -2.781125617 | 1.68E-07 | 5.07E-06 | Tmem108 |
| 4145.98 | 6223.54 | 10736.73  | 14952.936 | -1.3085958   | 1.69E-07 | 5.07E-06 | Tgm2    |
| 1089.46 | 1163.24 | 1941.4719 | 2043.8037 | -0.822493504 | 1.82E-07 | 5.44E-06 | Plgrkt  |
| 3457.41 | 4152.89 | 6894.6139 | 9834.8907 | -1.136025346 | 1.84E-07 | 5.47E-06 | Sipa111 |
| 61.2758 | 79.3318 | 218.90421 | 275.59644 | -1.808993855 | 1.84E-07 | 5.48E-06 | Stard9  |
| 1213.05 | 1240.79 | 2070.0346 | 2185.2603 | -0.793843785 | 2.16E-07 | 6.35E-06 | Tmbim4  |
| 61.2758 | 109.638 | 349.20433 | 296.32715 | -1.913233518 | 2.25E-07 | 6.59E-06 | Fam110c |
| 1685.6  | 2468.2  | 4447.5776 | 4571.7303 | -1.11812394  | 2.38E-07 | 6.95E-06 | Capn2   |
| 3988.12 | 3968.37 | 6522.8242 | 6300.9151 | -0.688700562 | 2.51E-07 | 7.30E-06 | Sqstm1  |
| 15.5786 | 7.13095 | 117.27011 | 85.36173  | -3.176246286 | 2.55E-07 | 7.41E-06 | Casp12  |
| 405.043 | 772.817 | 1600.0855 | 1952.3447 | -1.591116199 | 2.64E-07 | 7.64E-06 | Ikzf2   |
| 4164.68 | 8290.62 | 17786.836 | 17547.933 | -1.504194759 | 2.71E-07 | 7.82E-06 | Sell    |
| 112.166 | 187.187 | 620.22859 | 419.49193 | -1.795026853 | 2.84E-07 | 8.16E-06 | Mical2  |
| 276.26  | 599     | 1446.3314 | 1470.6607 | -1.735069824 | 2.94E-07 | 8.44E-06 | Tmtc2   |
| 32.1957 | 11.5878 | 155.49148 | 149.99275 | -2.817001383 | 2.96E-07 | 8.48E-06 | Cd300lb |
| 1333.53 | 1665.08 | 2759.7566 | 3627.8735 | -1.090133513 | 2.98E-07 | 8.52E-06 | Gpr146  |
| 5.19286 | 13.3705 | 88.604084 | 96.336809 | -3.295613382 | 3.02E-07 | 8.62E-06 | Gm15473 |
| 1841.39 | 2174.94 | 3493.7807 | 4288.8172 | -0.953711376 | 3.03E-07 | 8.62E-06 | Tubb6   |
| 4000.58 | 5689.61 | 9478.031  | 13344.477 | -1.235590925 | 3.13E-07 | 8.91E-06 | Socs3   |
| 149.554 | 141.728 | 343.99233 | 401.20013 | -1.354105139 | 3.20E-07 | 9.09E-06 | Nt5dc2  |
| 373.886 | 429.64  | 787.01275 | 981.65989 | -1.136135536 | 3.21E-07 | 9.09E-06 | Acp5    |
| 7468.37 | 12065.6 | 23547.838 | 21795.288 | -1.214823032 | 3.26E-07 | 9.18E-06 | Nabp1   |
| 7868.22 | 12341.9 | 22376.875 | 22918.405 | -1.164185258 | 3.38E-07 | 9.47E-06 | Ccr7    |
| 232.64  | 213.928 | 972.03893 | 506.07311 | -1.729151896 | 3.48E-07 | 9.72E-06 | Cma1    |
| 143.323 | 278.107 | 702.752   | 671.91876 | -1.702972633 | 3.55E-07 | 9.90E-06 | Nmrk1   |
| 71.6615 | 64.1785 | 224.11621 | 210.96542 | -1.681619526 | 3.64E-07 | 1.01E-05 | B3gnt8  |
| 12.4629 | 16.0446 | 96.422092 | 95.117356 | -2.742891152 | 4.11E-07 | 1.13E-05 | As3mt   |
| 2674.32 | 2538.62 | 4250.3901 | 5177.7986 | -0.85457195  | 4.11E-07 | 1.13E-05 | Osbpl8  |
| 125.667 | 164.012 | 370.92102 | 1109.7025 | -2.35108483  | 4.38E-07 | 1.19E-05 | Slc37a2 |
| 900.442 | 1534.05 | 2850.9667 | 3397.3968 | -1.359007977 | 4.44E-07 | 1.21E-05 | Pde4b   |
| 0       | 0.89137 | 85.129414 | 109.7508  | -7.665090052 | 4.47E-07 | 1.21E-05 | Aqp8    |
| 8871.49 | 10725.8 | 16736.617 | 21536.764 | -0.965532476 | 4.61E-07 | 1.25E-05 | Sdf4    |
| 449.702 | 672.092 | 1262.1739 | 1371.8849 | -1.22990728  | 4.68E-07 | 1.26E-05 | Osbpl3  |
| 2072.99 | 2380.85 | 3732.6642 | 4371.74   | -0.863076251 | 4.95E-07 | 1.33E-05 | Mier1   |
| 20.7714 | 5.34821 | 148.54214 | 106.09244 | -3.307396103 | 5.07E-07 | 1.36E-05 | Hck     |
| 176.557 | 235.321 | 476.89845 | 580.45976 | -1.356763846 | 5.08E-07 | 1.36E-05 | Kctd12  |
| 83.0858 | 82.8973 | 236.27756 | 248.76847 | -1.546474401 | 5.18E-07 | 1.38E-05 | Cxxc5   |
| 66.4686 | 151.533 | 380.47636 | 582.89867 | -2.138263284 | 5.20E-07 | 1.38E-05 | Wispl   |
| 173.442 | 422.509 | 1082.3597 | 1119.4581 | -1.883220802 | 5.45E-07 | 1.44E-05 | Myo1e   |

|         |         |           |           |              |          |          |               |
|---------|---------|-----------|-----------|--------------|----------|----------|---------------|
| 29.08   | 24.9583 | 121.61345 | 131.70095 | -2.230644879 | 5.93E-07 | 1.56E-05 | Selenbp1      |
| 39.4658 | 76.6577 | 627.17793 | 191.45417 | -2.816157022 | 5.97E-07 | 1.57E-05 | Rsad2         |
| 719.731 | 1242.57 | 3895.9737 | 2234.0384 | -1.643228187 | 6.16E-07 | 1.61E-05 | Slc15a3       |
| 119.436 | 147.967 | 436.07108 | 324.37457 | -1.508334973 | 6.20E-07 | 1.62E-05 | Itga2         |
| 45.6972 | 34.7634 | 246.70157 | 139.01767 | -2.268497161 | 6.77E-07 | 1.76E-05 | Gmpr          |
| 671.956 | 1350.42 | 3611.9194 | 2596.216  | -1.617683888 | 6.99E-07 | 1.81E-05 | Ccl5          |
| 14.54   | 26.7411 | 125.08812 | 117.06751 | -2.542669982 | 7.08E-07 | 1.84E-05 | 1700012B09Rik |
| 21.81   | 4.45684 | 218.03554 | 97.556262 | -3.608388119 | 7.15E-07 | 1.85E-05 | Csflr         |
| 29.08   | 37.4375 | 123.35078 | 221.9405  | -2.368437295 | 7.24E-07 | 1.87E-05 | Foxp3         |
| 10.3857 | 15.1533 | 94.684757 | 86.581183 | -2.820135077 | 7.25E-07 | 1.87E-05 | C2cd4b        |
| 6.23143 | 20.5015 | 160.70349 | 93.897903 | -3.236957213 | 7.26E-07 | 1.87E-05 | Dll4          |
| 1361.57 | 1633.88 | 3034.2556 | 2594.9966 | -0.910213995 | 7.49E-07 | 1.93E-05 | E330009J07Rik |
| 1066.61 | 1129.36 | 1828.5451 | 2090.1429 | -0.834670324 | 7.69E-07 | 1.97E-05 | Tnfaip8l2     |
| 117.359 | 144.402 | 317.06364 | 457.29498 | -1.560489765 | 7.81E-07 | 1.99E-05 | Acsf2         |
| 32.1957 | 34.7634 | 108.58344 | 486.56186 | -3.148339652 | 7.91E-07 | 2.01E-05 | Igsf23        |
| 29.08   | 30.3065 | 292.74095 | 107.31189 | -2.755820141 | 7.93E-07 | 2.01E-05 | Nrip3         |
| 46.7358 | 22.2842 | 1979.6932 | 481.68405 | -5.158570089 | 8.39E-07 | 2.12E-05 | Il1b          |
| 83.0858 | 173.817 | 382.2137  | 875.56746 | -2.287311857 | 9.12E-07 | 2.29E-05 | Gm19705       |
| 23.8872 | 44.5684 | 160.70349 | 163.40674 | -2.234684908 | 9.22E-07 | 2.31E-05 | Gipr          |
| 20.7714 | 32.9806 | 118.13878 | 158.52893 | -2.353877685 | 9.69E-07 | 2.42E-05 | Sgip1         |
| 54493.9 | 57826.7 | 88459.886 | 85545.867 | -0.631512353 | 9.72E-07 | 2.42E-05 | Tmsb4x        |
| 206.676 | 350.308 | 943.3729  | 688.9911  | -1.550288903 | 9.75E-07 | 2.42E-05 | Kctd11        |
| 6331.14 | 7273.57 | 10933.049 | 11789.674 | -0.73985531  | 9.93E-07 | 2.46E-05 | Ddit4         |
| 96.5872 | 41.8943 | 489.92847 | 243.89066 | -2.412777964 | 9.94E-07 | 2.46E-05 | Rgs18         |
| 389.465 | 594.543 | 1066.7237 | 1565.778  | -1.417680012 | 1.01E-06 | 2.48E-05 | Pck2          |
| 10.3857 | 33.872  | 117.27011 | 281.69371 | -3.157913044 | 1.02E-06 | 2.51E-05 | Ripor3        |
| 892.134 | 983.18  | 1594.8735 | 1740.1598 | -0.829694065 | 1.03E-06 | 2.52E-05 | Iqsec1        |
| 14.54   | 6.23958 | 96.422092 | 81.70337  | -3.118697849 | 1.04E-06 | 2.54E-05 | Oit3          |
| 159.94  | 273.65  | 577.66388 | 668.2604  | -1.519485472 | 1.05E-06 | 2.57E-05 | Nol4l         |
| 203.56  | 295.043 | 567.23987 | 754.84158 | -1.40353427  | 1.08E-06 | 2.62E-05 | Nbeal1        |
| 2359.64 | 1870.98 | 3703.1295 | 4231.5029 | -0.907384207 | 1.12E-06 | 2.70E-05 | Slc48a1       |
| 35.3115 | 10.6964 | 192.84418 | 139.01767 | -2.865812745 | 1.18E-06 | 2.84E-05 | Lpcat2        |
| 58.1601 | 71.3095 | 188.50085 | 256.08519 | -1.774508857 | 1.19E-06 | 2.86E-05 | Tmem205       |
| 43.62   | 43.6771 | 139.85547 | 248.76847 | -2.150081485 | 1.19E-06 | 2.87E-05 | Slc9a2        |
| 1303.41 | 1080.34 | 2169.9314 | 2130.3849 | -0.851843531 | 1.20E-06 | 2.89E-05 | Ifitm2        |
| 32.1957 | 31.1979 | 115.53278 | 187.79581 | -2.254584334 | 1.21E-06 | 2.90E-05 | Sptal         |
| 1943.17 | 2937.06 | 4818.4986 | 6650.8982 | -1.232256049 | 1.23E-06 | 2.94E-05 | Lamc1         |
| 38.4272 | 24.067  | 205.8742  | 120.72587 | -2.395611046 | 1.27E-06 | 3.01E-05 | Bear3         |
| 1909.93 | 1494.83 | 3049.0229 | 3336.4242 | -0.907469552 | 1.28E-06 | 3.03E-05 | Rin3          |
| 2661.86 | 3076.11 | 4690.8045 | 5586.3155 | -0.840341086 | 1.29E-06 | 3.05E-05 | Cmip          |
| 105.934 | 259.388 | 577.66388 | 965.807   | -2.075296541 | 1.36E-06 | 3.20E-05 | App12         |
| 27.0029 | 17.8274 | 306.63963 | 85.36173  | -3.136657713 | 1.37E-06 | 3.22E-05 | Oasl1         |
| 1430.11 | 1222.07 | 2281.1208 | 2358.4226 | -0.80712848  | 1.48E-06 | 3.44E-05 | Vat1          |
| 5730.84 | 9198.03 | 15226.004 | 18869.82  | -1.191324139 | 1.53E-06 | 3.54E-05 | Traf1         |
| 21.81   | 18.7187 | 104.2401  | 104.87298 | -2.370140389 | 1.56E-06 | 3.62E-05 | Osgin1        |

|         |         |           |           |              |          |          |               |
|---------|---------|-----------|-----------|--------------|----------|----------|---------------|
| 913.944 | 1125.8  | 1945.8152 | 1830.3994 | -0.888156651 | 1.58E-06 | 3.66E-05 | Chst12        |
| 3.11572 | 22.2842 | 212.82354 | 104.87298 | -3.626980523 | 1.60E-06 | 3.69E-05 | Gad1          |
| 3250.73 | 3013.72 | 5014.8174 | 6422.8604 | -0.868268588 | 1.62E-06 | 3.74E-05 | Rpl21         |
| 99.703  | 177.382 | 379.6077  | 573.14304 | -1.776941959 | 1.65E-06 | 3.79E-05 | Lamc2         |
| 663.648 | 747.858 | 1235.2452 | 1574.3142 | -0.991607066 | 1.68E-06 | 3.85E-05 | Gale          |
| 240.949 | 155.098 | 489.0598  | 570.70414 | -1.421756251 | 1.73E-06 | 3.95E-05 | Blvrb         |
| 49.8515 | 88.2455 | 220.64154 | 315.8384  | -1.950608447 | 1.77E-06 | 4.04E-05 | B430306N03Rik |
| 1093.62 | 1937.84 | 3379.9852 | 4479.0519 | -1.373627668 | 1.79E-06 | 4.07E-05 | Bend4         |
| 606.526 | 493.818 | 1069.3297 | 1057.266  | -0.95167962  | 1.79E-06 | 4.07E-05 | Pag1          |
| 158.902 | 168.469 | 354.41634 | 495.09803 | -1.372654887 | 1.80E-06 | 4.10E-05 | Abcb4         |
| 1450.89 | 2151.76 | 3612.7881 | 3941.273  | -1.067598937 | 1.84E-06 | 4.18E-05 | Lrrc8c        |
| 759.196 | 930.589 | 1538.4101 | 1599.9227 | -0.892220825 | 1.85E-06 | 4.18E-05 | Fam126a       |
| 1199.55 | 1227.41 | 1961.4512 | 2084.0457 | -0.736742261 | 1.87E-06 | 4.23E-05 | Rnasel        |
| 44.6586 | 17.8274 | 207.61153 | 146.33439 | -2.514021325 | 1.92E-06 | 4.34E-05 | Gda           |
| 33.2343 | 15.1533 | 292.74095 | 98.775716 | -3.027761344 | 1.96E-06 | 4.40E-05 | Cxcl2         |
| 1722.99 | 2215.94 | 3455.5593 | 4002.2457 | -0.920295431 | 1.99E-06 | 4.46E-05 | D16Ertd472e   |
| 609.642 | 388.637 | 1366.414  | 1082.8745 | -1.296825287 | 2.01E-06 | 4.50E-05 | Napsa         |
| 10.3857 | 29.4152 | 109.4521  | 179.25963 | -2.842897134 | 2.05E-06 | 4.59E-05 | Gm19345       |
| 54.0058 | 94.4851 | 235.40889 | 301.20496 | -1.846792097 | 2.07E-06 | 4.60E-05 | Zfp768        |
| 7.27001 | 8.02232 | 206.74286 | 39.022505 | -4.0096227   | 2.07E-06 | 4.60E-05 | Tlr13         |
| 2.07714 | 10.6964 | 71.230735 | 93.897903 | -3.659697521 | 2.08E-06 | 4.63E-05 | Gm43636       |
| 212.907 | 107.856 | 634.12727 | 456.07553 | -1.769340148 | 2.12E-06 | 4.69E-05 | Dtx4          |
| 93.4715 | 401.116 | 6755.6271 | 4329.0591 | -4.485607045 | 2.28E-06 | 5.02E-05 | Serpinb9b     |
| 230.563 | 234.43  | 464.73711 | 653.62696 | -1.263696174 | 2.30E-06 | 5.04E-05 | Gsap          |
| 20.7714 | 2.67411 | 168.52149 | 109.7508  | -3.593345873 | 2.32E-06 | 5.09E-05 | Lyz2          |
| 682.342 | 688.137 | 1159.6711 | 1415.7853 | -0.908995594 | 2.36E-06 | 5.16E-05 | Gm12715       |
| 64.3915 | 71.3095 | 185.89484 | 253.64628 | -1.691242661 | 2.36E-06 | 5.16E-05 | Manscl        |
| 415.429 | 672.983 | 1198.7611 | 1487.733  | -1.301693724 | 2.38E-06 | 5.19E-05 | Usp35         |
| 3308.89 | 3467.42 | 6090.2278 | 5214.3822 | -0.738571965 | 2.39E-06 | 5.20E-05 | Zyx           |
| 1.03857 | 4.45684 | 108.58344 | 35.364145 | -4.680658721 | 2.48E-06 | 5.37E-05 | Tpsb2         |
| 670.918 | 535.713 | 1421.14   | 1106.0441 | -1.068356665 | 2.50E-06 | 5.42E-05 | Mindy1        |
| 4217.64 | 4920.36 | 7375.8557 | 7728.8949 | -0.72482715  | 2.51E-06 | 5.42E-05 | Dock10        |
| 97.6258 | 113.204 | 310.98296 | 257.30464 | -1.430980845 | 2.56E-06 | 5.52E-05 | Tcp11l1       |
| 12206.3 | 13407.1 | 20130.501 | 26388.969 | -0.860819932 | 2.56E-06 | 5.52E-05 | Cd53          |
| 1950.44 | 2477.11 | 3819.531  | 4285.1588 | -0.871685717 | 2.58E-06 | 5.54E-05 | Pkp3          |
| 649.108 | 549.974 | 1471.5227 | 1076.7772 | -1.089373493 | 2.59E-06 | 5.54E-05 | Dapp1         |
| 231.602 | 161.338 | 470.81778 | 496.31749 | -1.301557296 | 2.59E-06 | 5.54E-05 | Evi2a         |
| 5085.89 | 6919.69 | 10628.147 | 12704.264 | -0.958398178 | 2.59E-06 | 5.54E-05 | Fosl2         |
| 19.7329 | 28.5238 | 114.66411 | 117.06751 | -2.257107737 | 2.59E-06 | 5.54E-05 | Tlr4          |
| 194.213 | 275.433 | 622.83459 | 523.14546 | -1.285935944 | 2.61E-06 | 5.57E-05 | Gm29216       |
| 1422.84 | 1814.83 | 2940.4395 | 5163.1652 | -1.322949057 | 2.65E-06 | 5.64E-05 | 2410006H16Rik |
| 122.552 | 133.705 | 290.13494 | 423.15029 | -1.473228897 | 2.79E-06 | 5.91E-05 | Smpdl3a       |
| 3.11572 | 2.67411 | 70.362067 | 40.241958 | -4.265923166 | 2.82E-06 | 5.95E-05 | Clec4a1       |
| 49.8515 | 53.4821 | 150.27948 | 263.40191 | -1.996275226 | 2.85E-06 | 6.00E-05 | H2-Ob         |
| 5.19286 | 12.4792 | 62.54406  | 112.1897  | -3.284177541 | 2.93E-06 | 6.14E-05 | Gdf15         |

|         |         |           |           |              |          |          |           |
|---------|---------|-----------|-----------|--------------|----------|----------|-----------|
| 3492.72 | 3745.53 | 5786.1942 | 7909.374  | -0.919632774 | 2.98E-06 | 6.24E-05 | Rabac1    |
| 3978.77 | 5999.8  | 9418.9616 | 13005.469 | -1.167902556 | 3.00E-06 | 6.27E-05 | Il12rb2   |
| 67.5072 | 56.1562 | 262.33758 | 171.94291 | -1.817812068 | 3.02E-06 | 6.31E-05 | Creb3l1   |
| 17.6557 | 20.5015 | 90.341419 | 110.97025 | -2.394152987 | 3.05E-06 | 6.37E-05 | Trim6     |
| 2184.12 | 2151.76 | 3356.5312 | 3502.2698 | -0.661505034 | 3.06E-06 | 6.37E-05 | Inpp5d    |
| 2576.7  | 3090.38 | 4643.0278 | 5752.1611 | -0.874733122 | 3.21E-06 | 6.66E-05 | Flot1     |
| 43496.5 | 48150   | 70201.364 | 71700.195 | -0.630722762 | 3.22E-06 | 6.66E-05 | H2-D1     |
| 49.8515 | 34.7634 | 162.44082 | 153.65111 | -1.907044184 | 3.22E-06 | 6.66E-05 | Ttc12     |
| 2518.54 | 5267.1  | 10138.218 | 10849.476 | -1.43042808  | 3.34E-06 | 6.87E-05 | Rbpj      |
| 12.4629 | 26.7411 | 99.896762 | 140.23713 | -2.600627007 | 3.39E-06 | 6.97E-05 | Ovol2     |
| 1322.1  | 1701.62 | 3146.3137 | 2635.2385 | -0.935080644 | 3.41E-06 | 6.99E-05 | Eif2ak3   |
| 19.7329 | 2.67411 | 170.25883 | 96.336809 | -3.59724125  | 3.44E-06 | 7.04E-05 | Pilra     |
| 172.403 | 289.695 | 563.7652  | 703.62454 | -1.452219034 | 3.48E-06 | 7.12E-05 | Ifngr2    |
| 254.45  | 240.67  | 503.82715 | 503.6342  | -1.025367938 | 3.60E-06 | 7.36E-05 | Mob3c     |
| 338.575 | 320.001 | 624.57193 | 643.87133 | -0.94576387  | 3.78E-06 | 7.72E-05 | Plod1     |
| 4.15429 | 2.67411 | 59.938057 | 46.339225 | -3.976827613 | 3.86E-06 | 7.85E-05 | l-Mar     |
| 27.0029 | 16.0446 | 122.48212 | 101.21462 | -2.388114036 | 3.97E-06 | 8.06E-05 | Batf2     |
| 132.937 | 109.638 | 515.11982 | 279.2548  | -1.715555773 | 4.01E-06 | 8.13E-05 | Slc6a9    |
| 6371.64 | 9775.64 | 15247.721 | 20062.445 | -1.128628459 | 4.02E-06 | 8.14E-05 | Rpl17     |
| 131.899 | 163.12  | 353.54767 | 349.98309 | -1.25187913  | 4.23E-06 | 8.50E-05 | Tirap     |
| 131.899 | 222.842 | 433.46508 | 668.2604  | -1.630792736 | 4.24E-06 | 8.50E-05 | Sipa1l2   |
| 545.251 | 499.166 | 905.15153 | 1085.3134 | -0.929657833 | 4.24E-06 | 8.50E-05 | AI413582  |
| 8.30858 | 6.23958 | 95.553424 | 49.997585 | -3.334870527 | 4.38E-06 | 8.76E-05 | Clec5a    |
| 73.7386 | 145.293 | 334.43699 | 404.85849 | -1.749707287 | 4.47E-06 | 8.92E-05 | Jdp2      |
| 11.4243 | 8.02232 | 85.998082 | 63.411571 | -2.952905157 | 4.48E-06 | 8.92E-05 | Fmn12     |
| 2032.49 | 4331.16 | 16262.324 | 22069.665 | -2.59053264  | 4.50E-06 | 8.95E-05 | Serpinb6b |
| 32.1957 | 25.8497 | 112.05811 | 134.13986 | -2.086029307 | 4.59E-06 | 9.09E-05 | Rapsn     |
| 195.252 | 285.238 | 519.46316 | 832.88659 | -1.489548218 | 4.60E-06 | 9.10E-05 | Tsc22d3   |
| 12.4629 | 16.0446 | 84.260747 | 85.36173  | -2.567549349 | 4.69E-06 | 9.26E-05 | Zfp683    |
| 1261.87 | 1699.84 | 2701.5559 | 2898.6404 | -0.918340329 | 4.76E-06 | 9.39E-05 | Lss       |
| 2906.96 | 3536.06 | 5244.1457 | 6491.1498 | -0.864590811 | 4.90E-06 | 9.64E-05 | Crybg1    |
| 1650.29 | 1930.7  | 2996.9029 | 2990.0994 | -0.74111628  | 4.92E-06 | 9.66E-05 | Rab5b     |
| 506.823 | 680.114 | 1117.1064 | 1763.3294 | -1.277299828 | 5.12E-06 | 0.0001   | Sla2      |
| 127.744 | 61.5044 | 364.84035 | 304.86332 | -1.829026967 | 5.22E-06 | 0.000101 | Slc41a3   |
| 495.399 | 237.995 | 1227.4272 | 960.92919 | -1.579415482 | 5.32E-06 | 0.000103 | Ncf2      |
| 1787.38 | 2288.14 | 3690.0995 | 3558.3647 | -0.830371009 | 5.33E-06 | 0.000103 | Hacd3     |
| 28.0415 | 11.5878 | 122.48212 | 110.97025 | -2.572273346 | 5.37E-06 | 0.000103 | Fkbp9     |
| 117.359 | 46.3512 | 285.79161 | 421.93084 | -2.115876206 | 5.42E-06 | 0.000104 | Vill      |
| 1043.77 | 1879.01 | 3163.687  | 4146.1412 | -1.32176234  | 5.46E-06 | 0.000105 | Camk4     |
| 146.439 | 232.647 | 1025.8963 | 428.0281  | -1.939599514 | 5.47E-06 | 0.000105 | Lrp1      |
| 86.2015 | 201.449 | 408.27372 | 820.69206 | -2.090834015 | 5.58E-06 | 0.000106 | Cxcr6     |
| 246.142 | 97.1592 | 930.34289 | 503.6342  | -2.066206121 | 5.58E-06 | 0.000106 | Ccr1      |
| 1413.5  | 1635.66 | 2572.9931 | 4033.9515 | -1.114809496 | 5.59E-06 | 0.000107 | Tpt1-ps3  |
| 808.009 | 935.937 | 1465.4421 | 1613.3367 | -0.818928534 | 5.72E-06 | 0.000109 | Mxi1      |
| 97.6258 | 93.5937 | 225.85355 | 449.97826 | -1.818344119 | 5.73E-06 | 0.000109 | Prdm1     |



|         |         |           |           |              |          |          |               |
|---------|---------|-----------|-----------|--------------|----------|----------|---------------|
| 83.0858 | 156.881 | 360.49701 | 391.4445  | -1.643206288 | 5.80E-06 | 0.00011  | Siah3         |
| 887.979 | 931.48  | 1487.1588 | 1536.5111 | -0.732351658 | 6.01E-06 | 0.000113 | Zc3h12a       |
| 1947.32 | 2068.87 | 3088.9816 | 3331.5464 | -0.676437043 | 6.03E-06 | 0.000113 | Cep85         |
| 1739.61 | 1779.17 | 2823.1694 | 4007.1235 | -0.956238808 | 6.10E-06 | 0.000114 | Nxpe3         |
| 822.549 | 884.238 | 1560.9955 | 1387.7378 | -0.789208251 | 6.12E-06 | 0.000115 | Hopx          |
| 2141.54 | 3014.61 | 4590.039  | 6798.452  | -1.142706044 | 6.43E-06 | 0.00012  | mt-Rnr1       |
| 3728.47 | 4720.69 | 6965.8446 | 8074.0002 | -0.831577206 | 6.52E-06 | 0.000121 | Cds2          |
| 37085.3 | 38775.4 | 59773.879 | 91628.5   | -0.996929654 | 6.57E-06 | 0.000122 | Tpt1          |
| 630.413 | 260.28  | 1638.3069 | 1259.6952 | -1.703824438 | 6.58E-06 | 0.000122 | Creg1         |
| 42.5815 | 33.872  | 456.05043 | 102.43408 | -2.873494308 | 6.66E-06 | 0.000123 | Ptgs1         |
| 122.552 | 211.254 | 1005.917  | 386.56669 | -2.060575408 | 6.79E-06 | 0.000125 | Usp18         |
| 1.03857 | 2.67411 | 64.281395 | 35.364145 | -4.719880025 | 6.86E-06 | 0.000126 | Rnf150        |
| 22.8486 | 18.7187 | 84.260747 | 134.13986 | -2.392227346 | 6.87E-06 | 0.000126 | Abcc3         |
| 15.5786 | 4.45684 | 110.32077 | 71.947744 | -3.209197948 | 6.94E-06 | 0.000127 | Layn          |
| 1683.53 | 2371.04 | 3618.0001 | 5174.1403 | -1.116022968 | 6.96E-06 | 0.000127 | Ifngr1        |
| 4211.41 | 4503.19 | 6551.4902 | 6869.1803 | -0.622764402 | 7.01E-06 | 0.000128 | Atf4          |
| 30.1186 | 16.936  | 132.90613 | 102.43408 | -2.333534231 | 7.04E-06 | 0.000128 | Rbpms         |
| 155.786 | 95.3764 | 341.38633 | 360.95817 | -1.486867993 | 7.12E-06 | 0.00013  | Rassf4        |
| 90.3558 | 68.6354 | 218.03554 | 232.91558 | -1.506445685 | 7.35E-06 | 0.000133 | Ctsl          |
| 418.545 | 253.149 | 1572.2882 | 710.94126 | -1.767365011 | 7.36E-06 | 0.000133 | Cfp           |
| 68.5458 | 49.9166 | 165.91549 | 242.6712  | -1.786367761 | 8.01E-06 | 0.000144 | Slc52a3       |
| 7.27001 | 1.78274 | 52.988717 | 68.289384 | -3.774723715 | 8.22E-06 | 0.000147 | Entpd3        |
| 8794.63 | 9077.7  | 13191.585 | 15841.918 | -0.699841052 | 8.55E-06 | 0.000152 | Rps27         |
| 18601.9 | 23592.7 | 37746.209 | 34373.949 | -0.773325427 | 8.58E-06 | 0.000153 | Ly6a          |
| 2385.6  | 3014.61 | 4444.1029 | 5555.8291 | -0.888369793 | 8.59E-06 | 0.000153 | Dgkd          |
| 3.11572 | 0       | 85.129414 | 31.705785 | -5.307380392 | 8.84E-06 | 0.000157 | Fpr1          |
| 6.23143 | 4.45684 | 45.17071  | 73.167197 | -3.472869218 | 8.88E-06 | 0.000157 | Slc8a1        |
| 41.5429 | 69.5268 | 164.17816 | 289.01043 | -2.020802278 | 8.94E-06 | 0.000158 | 2410004P03Rik |
| 40.5043 | 55.2649 | 150.27948 | 179.25963 | -1.776823817 | 8.95E-06 | 0.000158 | Lst1          |
| 11.4243 | 14.2619 | 164.17816 | 54.875398 | -3.094508772 | 8.98E-06 | 0.000158 | Ifi204        |
| 7.27001 | 2.67411 | 58.200722 | 57.314304 | -3.563567399 | 9.19E-06 | 0.000162 | Dbn1          |
| 2079.22 | 2100.96 | 3458.1653 | 3144.97   | -0.659906118 | 9.25E-06 | 0.000162 | B4galt1       |
| 0       | 0       | 32.140697 | 35.364145 | -7.574383079 | 9.36E-06 | 0.000164 | Hoxa10        |
| 488.129 | 900.282 | 1666.9729 | 1738.9404 | -1.293434225 | 9.56E-06 | 0.000167 | AA467197      |
| 2048.06 | 2457.5  | 3660.5648 | 5176.5792 | -0.971261978 | 9.85E-06 | 0.000171 | Lfng          |
| 1698.07 | 583.846 | 10040.928 | 9632.4615 | -3.108123817 | 1.02E-05 | 0.000176 | Cyp11a1       |
| 3882.18 | 5957.02 | 9004.6073 | 12134.78  | -1.103051336 | 1.03E-05 | 0.000177 | Emb           |
| 168.249 | 401.116 | 909.49487 | 892.6398  | -1.660121462 | 1.03E-05 | 0.000178 | Klrd1         |
| 44.6586 | 57.0476 | 453.44443 | 129.26205 | -2.520039554 | 1.07E-05 | 0.000184 | Rtp4          |
| 75.8158 | 116.769 | 246.70157 | 336.56911 | -1.592891021 | 1.07E-05 | 0.000184 | Hpse          |
| 61.2758 | 13.3705 | 385.68837 | 170.72346 | -2.908118597 | 1.07E-05 | 0.000184 | Cd300lf       |
| 29.08   | 14.2619 | 93.816089 | 147.55385 | -2.483830668 | 1.07E-05 | 0.000184 | Mylip         |
| 1031.3  | 1050.03 | 1681.7403 | 2392.5673 | -0.968065446 | 1.08E-05 | 0.000185 | Clip2         |
| 69.5844 | 101.616 | 231.06555 | 262.18246 | -1.521635027 | 1.08E-05 | 0.000185 | Fdps          |
| 203.56  | 383.289 | 962.48358 | 696.30782 | -1.498016933 | 1.09E-05 | 0.000187 | Tpbg          |

|         |         |           |           |              |          |          |          |
|---------|---------|-----------|-----------|--------------|----------|----------|----------|
| 2266.17 | 2753.44 | 4183.5027 | 4164.433  | -0.733551327 | 1.10E-05 | 0.000188 | Cflar    |
| 27.0029 | 17.8274 | 122.48212 | 92.678449 | -2.272491594 | 1.11E-05 | 0.00019  | Cadm3    |
| 3.11572 | 0.89137 | 63.412727 | 34.144692 | -4.650181257 | 1.13E-05 | 0.000192 | Gm13053  |
| 7816.3  | 8386    | 12934.459 | 22256.242 | -1.118860099 | 1.17E-05 | 0.000198 | Ablim1   |
| 2876.85 | 4612.83 | 8668.4329 | 7188.6771 | -1.082032777 | 1.20E-05 | 0.000203 | Mxd1     |
| 2408.45 | 2626.86 | 4004.5572 | 6148.4834 | -1.011276611 | 1.23E-05 | 0.000207 | Stk17b   |
| 760.235 | 1377.16 | 2705.0306 | 2358.4226 | -1.243710386 | 1.24E-05 | 0.000208 | Arl14ep  |
| 1627.44 | 2131.26 | 3218.4131 | 5607.0462 | -1.230829096 | 1.24E-05 | 0.000209 | Gatsl3   |
| 2197.62 | 3122.46 | 4869.75   | 5100.9731 | -0.905858751 | 1.29E-05 | 0.000214 | Fam129a  |
| 1199.55 | 1110.65 | 1984.0366 | 1807.2298 | -0.715421532 | 1.30E-05 | 0.000215 | BC037034 |
| 637.683 | 562.454 | 1004.1796 | 1193.8448 | -0.872523778 | 1.30E-05 | 0.000216 | Cerk     |
| 236.795 | 162.229 | 485.58513 | 449.97826 | -1.232423867 | 1.32E-05 | 0.000219 | Tbc1d8   |
| 96.5872 | 53.4821 | 241.48956 | 242.6712  | -1.695119057 | 1.34E-05 | 0.000221 | Dynl1c   |
| 9.34715 | 7.13095 | 116.40144 | 43.900318 | -3.293851506 | 1.34E-05 | 0.000222 | Cd180    |
| 34.2729 | 56.1562 | 136.3808  | 253.64628 | -2.100234957 | 1.36E-05 | 0.000224 | Extl1    |
| 39.4658 | 10.6964 | 213.6922  | 123.16478 | -2.761433514 | 1.37E-05 | 0.000226 | Pilrb1   |
| 5892.86 | 9910.24 | 16130.287 | 17340.626 | -1.082567974 | 1.37E-05 | 0.000226 | Lama5    |
| 292.877 | 135.488 | 651.50062 | 632.89625 | -1.587057074 | 1.39E-05 | 0.000228 | Pglyrp1  |
| 5.19286 | 16.936  | 74.705405 | 103.65353 | -2.989515443 | 1.41E-05 | 0.000231 | Sell13   |
| 13512.9 | 15935   | 22558.426 | 24397.602 | -0.673059744 | 1.43E-05 | 0.000234 | H2-T23   |
| 5.19286 | 8.02232 | 77.311407 | 47.558678 | -3.234618892 | 1.43E-05 | 0.000234 | Hrc      |
| 1636.79 | 2605.47 | 4145.2813 | 4671.7255 | -1.054934372 | 1.44E-05 | 0.000235 | AW112010 |
| 871.362 | 951.09  | 1459.3614 | 1884.0553 | -0.874189088 | 1.47E-05 | 0.000239 | Ndufa6   |
| 117.359 | 73.9836 | 322.27564 | 245.11011 | -1.573955339 | 1.53E-05 | 0.000247 | Fam174b  |
| 3642.27 | 3635    | 6513.2689 | 5368.0333 | -0.707545035 | 1.54E-05 | 0.000249 | Plek     |
| 1210.98 | 2305.97 | 3811.713  | 4792.4514 | -1.290117603 | 1.55E-05 | 0.000249 | Espn     |
| 813.202 | 1050.92 | 1636.5696 | 3660.7987 | -1.505899798 | 1.55E-05 | 0.00025  | Trib2    |
| 96.5872 | 131.031 | 306.63963 | 273.15753 | -1.34720438  | 1.56E-05 | 0.000251 | Wls      |
| 734.271 | 631.089 | 1436.776  | 1132.8721 | -0.913926006 | 1.56E-05 | 0.000252 | Nt5c3    |
| 119.436 | 171.143 | 419.5664  | 326.81348 | -1.360204652 | 1.58E-05 | 0.000253 | Phlda1   |
| 348.96  | 421.617 | 689.72199 | 947.5152  | -1.084774584 | 1.60E-05 | 0.000256 | Spata6   |
| 27.0029 | 47.2425 | 139.85547 | 151.21221 | -1.963116104 | 1.60E-05 | 0.000256 | Rgs8     |
| 81.0086 | 65.0699 | 226.72222 | 187.79581 | -1.50930682  | 1.61E-05 | 0.000257 | Ms4a6d   |
| 43015.6 | 50624.4 | 71314.995 | 76268.267 | -0.656305763 | 1.61E-05 | 0.000257 | H2-K1    |
| 27.0029 | 39.2202 | 103.37143 | 221.9405  | -2.287817038 | 1.65E-05 | 0.000262 | Smim24   |
| 423.738 | 884.238 | 3159.3437 | 5368.0333 | -2.704386875 | 1.72E-05 | 0.000272 | Gzma     |
| 15.5786 | 1.78274 | 81.654745 | 114.62861 | -3.524082782 | 1.72E-05 | 0.000273 | Csrp3    |
| 743.618 | 954.656 | 1461.0987 | 1685.2844 | -0.888312802 | 1.73E-05 | 0.000273 | Zfp52    |
| 50.89   | 67.744  | 177.20817 | 180.47909 | -1.588393361 | 1.74E-05 | 0.000275 | Zfp945   |
| 736.348 | 1050.92 | 1814.6464 | 1673.0899 | -0.963923087 | 1.75E-05 | 0.000275 | Fam214b  |
| 1489.31 | 1786.3  | 2603.3965 | 3224.2345 | -0.830303842 | 1.83E-05 | 0.000288 | Mtmt6    |
| 152.67  | 65.9613 | 511.64515 | 312.18004 | -1.919311699 | 1.84E-05 | 0.000288 | Ly11     |
| 13.5014 | 50.808  | 200.66219 | 170.72346 | -2.519911655 | 1.85E-05 | 0.00029  | Il22     |
| 34.2729 | 39.2202 | 316.19497 | 98.775716 | -2.500362643 | 1.87E-05 | 0.000293 | Oas2     |
| 896.288 | 1219.39 | 1851.1304 | 3868.1058 | -1.433837534 | 1.89E-05 | 0.000295 | Ctsw     |

|         |         |           |           |              |          |          |          |
|---------|---------|-----------|-----------|--------------|----------|----------|----------|
| 20.7714 | 4.45684 | 106.8461  | 97.556262 | -3.038951934 | 1.89E-05 | 0.000295 | Gna14    |
| 549.405 | 723.791 | 1216.1345 | 1168.2362 | -0.904309405 | 1.91E-05 | 0.000298 | Tmbim1   |
| 1959.79 | 2244.47 | 3228.8371 | 3709.5769 | -0.722138403 | 1.93E-05 | 0.0003   | Osbpl9   |
| 6.23143 | 12.4792 | 62.54406  | 76.825557 | -2.880650023 | 1.99E-05 | 0.000307 | Mamdc2   |
| 997.03  | 982.288 | 1541.0161 | 1638.9452 | -0.683668299 | 2.03E-05 | 0.000314 | Vps13c   |
| 48.8129 | 93.5937 | 207.61153 | 297.5466  | -1.819519869 | 2.06E-05 | 0.000318 | Bspry    |
| 119.436 | 180.948 | 377.87036 | 365.83598 | -1.30510792  | 2.07E-05 | 0.000318 | Aifm2    |
| 2.07714 | 6.23958 | 34.7467   | 91.458996 | -3.893081362 | 2.16E-05 | 0.00033  | Gm27162  |
| 3990.2  | 5228.77 | 7593.8912 | 8369.1079 | -0.79177803  | 2.16E-05 | 0.00033  | Igf2r    |
| 2825.96 | 3529.82 | 5038.2715 | 6405.7881 | -0.847989553 | 2.16E-05 | 0.00033  | Unc119b  |
| 301.186 | 346.742 | 578.53255 | 703.62454 | -0.982253764 | 2.17E-05 | 0.000332 | Mgat4a   |
| 113.204 | 32.9806 | 350.073   | 319.49676 | -2.201684381 | 2.20E-05 | 0.000335 | Card9    |
| 104.896 | 73.9836 | 233.67156 | 247.54902 | -1.430674684 | 2.24E-05 | 0.00034  | Man1c1   |
| 1.03857 | 0.89137 | 61.675392 | 28.047425 | -5.551504047 | 2.25E-05 | 0.000341 | Fcgr1    |
| 952.371 | 820.059 | 1461.0987 | 1513.3415 | -0.747278393 | 2.25E-05 | 0.000341 | Plxnd1   |
| 338.575 | 485.796 | 787.01275 | 997.51278 | -1.111782401 | 2.28E-05 | 0.000345 | Klhl22   |
| 6.23143 | 6.23958 | 54.726052 | 53.655944 | -3.11967808  | 2.30E-05 | 0.000347 | Fzd4     |
| 31.1572 | 32.0893 | 96.422092 | 184.13745 | -2.143807893 | 2.30E-05 | 0.000347 | Itgb5    |
| 233.679 | 218.385 | 438.67708 | 451.19771 | -0.977348782 | 2.31E-05 | 0.000348 | Slc8b1   |
| 433.085 | 508.08  | 809.59811 | 1190.1864 | -1.085213423 | 2.31E-05 | 0.000348 | Prickle3 |
| 27.0029 | 98.9419 | 681.03532 | 1435.2965 | -4.06837958  | 2.34E-05 | 0.000352 | Ccdc184  |
| 322.996 | 733.596 | 3723.1089 | 2625.4829 | -2.586662866 | 2.35E-05 | 0.000352 | Gzmc     |
| 43.62   | 22.2842 | 300.55895 | 98.775716 | -2.608264582 | 2.37E-05 | 0.000355 | Lpl      |
| 39.4658 | 44.5684 | 203.26819 | 117.06751 | -1.933702996 | 2.41E-05 | 0.000361 | F11r     |
| 55.0443 | 76.6577 | 178.07684 | 214.62378 | -1.570517209 | 2.48E-05 | 0.000369 | Gipc3    |
| 32.1957 | 6.23958 | 566.37121 | 315.8384  | -4.527421734 | 2.48E-05 | 0.00037  | Pirb     |
| 35.3115 | 83.7887 | 231.06555 | 226.81831 | -1.936187425 | 2.49E-05 | 0.000371 | Wnt10b   |
| 3084.56 | 3093.94 | 4675.1685 | 4527.83   | -0.574940438 | 2.50E-05 | 0.000371 | Ehbp111  |
| 22.8486 | 92.7023 | 302.29629 | 295.10769 | -2.363260904 | 2.54E-05 | 0.000375 | Gent2    |
| 143.323 | 123.9   | 312.7203  | 290.22988 | -1.17634077  | 2.54E-05 | 0.000376 | Hsd17b11 |
| 282.492 | 316.436 | 533.36184 | 729.23306 | -1.073264507 | 2.55E-05 | 0.000377 | Nat9     |
| 1506.97 | 2004.69 | 3611.9194 | 2916.9322 | -0.894667034 | 2.59E-05 | 0.000382 | Gpr171   |
| 1.03857 | 0.89137 | 53.857385 | 30.486332 | -5.46125653  | 2.61E-05 | 0.000383 | Il1f9    |
| 19.7329 | 10.6964 | 91.210087 | 78.04501  | -2.488096186 | 2.61E-05 | 0.000383 | Slc25a43 |
| 1.03857 | 8.02232 | 41.69604  | 99.995169 | -3.92860794  | 2.62E-05 | 0.000384 | Gm44659  |
| 2936.04 | 3611.83 | 5238.9337 | 8687.3852 | -1.088332766 | 2.62E-05 | 0.000384 | Tecpr1   |
| 661.571 | 1046.47 | 1725.1736 | 1810.8881 | -1.048763924 | 2.73E-05 | 0.000398 | Elovl6   |
| 2667.05 | 3249.04 | 4685.5925 | 4960.7359 | -0.704965639 | 2.74E-05 | 0.000398 | Pbxip1   |
| 614.835 | 820.059 | 1240.4572 | 1838.9355 | -1.100092648 | 2.76E-05 | 0.000401 | Suox     |
| 8737.51 | 9647.28 | 13705.836 | 18802.75  | -0.822145007 | 2.77E-05 | 0.000402 | Selplg   |
| 1537.09 | 1899.51 | 2878.7641 | 2844.9845 | -0.735579981 | 2.82E-05 | 0.000407 | Dennd4a  |
| 7.27001 | 18.7187 | 55.59472  | 178.04018 | -3.151889688 | 2.86E-05 | 0.000412 | Prrt1    |
| 1706.37 | 795.992 | 10315.427 | 6019.2214 | -2.706765188 | 2.86E-05 | 0.000412 | F2r      |
| 1848.66 | 1920.9  | 4908.84   | 2949.8575 | -1.060381699 | 2.89E-05 | 0.000415 | Grn      |
| 594.063 | 612.37  | 965.95825 | 1184.0891 | -0.832207456 | 2.95E-05 | 0.000423 | Lrp8     |

|         |         |           |           |              |          |          |          |
|---------|---------|-----------|-----------|--------------|----------|----------|----------|
| 1179.82 | 1174.82 | 1785.9804 | 2177.9436 | -0.750611666 | 2.95E-05 | 0.000423 | Mvb12a   |
| 658.455 | 726.465 | 2013.5713 | 1146.2861 | -1.190999187 | 2.99E-05 | 0.000428 | Tgtp2    |
| 56.0829 | 33.872  | 142.46147 | 174.38182 | -1.820490409 | 3.12E-05 | 0.000445 | Eya2     |
| 124.629 | 200.558 | 368.31502 | 475.58678 | -1.371482331 | 3.22E-05 | 0.000456 | Med12l   |
| 355.192 | 514.32  | 840.00147 | 949.95411 | -1.039599958 | 3.24E-05 | 0.000459 | Acsl3    |
| 0       | 0       | 35.615367 | 21.950159 | -7.34942796  | 3.28E-05 | 0.000463 | Dcstamp  |
| 3762.75 | 4729.6  | 6624.4583 | 8236.1875 | -0.806902336 | 3.43E-05 | 0.000483 | Tspan13  |
| 2.07714 | 5.34821 | 99.896762 | 26.827972 | -4.078666601 | 3.47E-05 | 0.000486 | Prkg1    |
| 156710  | 170512  | 236810.92 | 304603.58 | -0.726454756 | 3.49E-05 | 0.000488 | Eef1a1   |
| 1870.47 | 1728.36 | 2700.6872 | 3435.1999 | -0.769284135 | 3.51E-05 | 0.00049  | Man2a2   |
| 4416.01 | 4466.65 | 6340.404  | 7133.8017 | -0.600904636 | 3.52E-05 | 0.000491 | Elmo2    |
| 6052.8  | 11084.2 | 17369.875 | 20317.311 | -1.136834174 | 3.73E-05 | 0.000517 | Bhlhe40  |
| 41.5429 | 6.23958 | 187.63218 | 169.50401 | -2.915159784 | 3.74E-05 | 0.000517 | Ptafr    |
| 205.637 | 290.586 | 482.97913 | 678.01602 | -1.222848673 | 3.91E-05 | 0.000536 | Fam71b   |
| 3459.48 | 3557.45 | 5092.9975 | 6359.4489 | -0.706366856 | 3.91E-05 | 0.000536 | Vsir     |
| 293.916 | 313.762 | 552.47253 | 559.72906 | -0.871384724 | 3.91E-05 | 0.000536 | Dnase11l |
| 229.525 | 206.798 | 401.32438 | 520.70655 | -1.077936553 | 3.93E-05 | 0.000538 | Hest     |
| 847.475 | 1329.03 | 2316.7362 | 2079.1678 | -1.013627852 | 3.97E-05 | 0.000543 | Cd24a    |
| 83.0858 | 34.7634 | 377.00169 | 169.50401 | -2.220969238 | 4.00E-05 | 0.000546 | Tmem40   |
| 739.464 | 787.079 | 1699.9823 | 1204.8198 | -0.929217717 | 4.01E-05 | 0.000546 | Myo1f    |
| 8862.14 | 9585.78 | 13235.018 | 15857.77  | -0.657039585 | 4.05E-05 | 0.000551 | Rpl39    |
| 778.929 | 1263.07 | 1911.0685 | 2553.5352 | -1.127421856 | 4.05E-05 | 0.000551 | Gm19585  |
| 59.1986 | 81.1145 | 482.97913 | 154.87057 | -2.185998455 | 4.15E-05 | 0.000563 | Oas1a    |
| 154.747 | 241.561 | 440.41442 | 489.00077 | -1.226394048 | 4.36E-05 | 0.000588 | Sh2d5    |
| 950.294 | 1056.27 | 1569.6822 | 1651.1397 | -0.681989302 | 4.48E-05 | 0.000603 | Rpl221l  |
| 6670.75 | 6687.94 | 9454.577  | 9908.0579 | -0.535420362 | 4.56E-05 | 0.000611 | Diaph1   |
| 783.084 | 754.989 | 1196.1551 | 1304.815  | -0.700910741 | 4.59E-05 | 0.000616 | Rps6-ps4 |
| 319.88  | 112.312 | 1437.6447 | 1640.1647 | -2.8331194   | 4.61E-05 | 0.000617 | Slc18a2  |
| 204.599 | 232.647 | 402.19305 | 517.04819 | -1.068933032 | 4.62E-05 | 0.000618 | Stxbp1   |
| 109.05  | 27.6324 | 938.16089 | 771.91393 | -3.647602834 | 4.63E-05 | 0.000619 | Tnfaip2  |
| 1413.5  | 2139.28 | 3139.3643 | 3891.2754 | -0.983999974 | 4.76E-05 | 0.000633 | Ypel3    |
| 3024.32 | 3678.68 | 5137.2996 | 5792.4031 | -0.704968874 | 4.77E-05 | 0.000634 | Adarb1   |
| 9090.62 | 10618.9 | 14581.453 | 18864.942 | -0.762795743 | 4.79E-05 | 0.000636 | Stat3    |
| 1168.39 | 1080.34 | 1738.2037 | 2564.5102 | -0.935386369 | 4.94E-05 | 0.000653 | Ms4a4c   |
| 2492.57 | 3979.07 | 6554.9649 | 6107.022  | -0.968076971 | 4.95E-05 | 0.000654 | Runx3    |
| 10256.9 | 9210.51 | 15166.066 | 14034.688 | -0.585067319 | 5.01E-05 | 0.000661 | Itm2b    |
| 8778.01 | 12649.4 | 17821.582 | 21946.501 | -0.892019285 | 5.13E-05 | 0.000675 | Cytip    |
| 719.731 | 751.424 | 1149.2471 | 1576.7531 | -0.888428858 | 5.14E-05 | 0.000675 | Phf1     |
| 3334.86 | 3643.92 | 5059.1195 | 6063.1217 | -0.671990583 | 5.23E-05 | 0.000687 | Itpkb    |
| 321.957 | 408.247 | 644.55128 | 798.7419  | -0.980445819 | 5.26E-05 | 0.000689 | Zmym6    |
| 737.386 | 345.851 | 1719.9616 | 1209.6977 | -1.437041504 | 5.30E-05 | 0.000693 | Syk      |
| 614.835 | 631.089 | 998.96762 | 1036.5353 | -0.707704139 | 5.32E-05 | 0.000695 | Mlkl     |
| 196.29  | 393.094 | 708.83268 | 826.78932 | -1.378974783 | 5.34E-05 | 0.000696 | Sdc4     |
| 3980.85 | 4374.84 | 6040.7138 | 7210.6272 | -0.664956828 | 5.35E-05 | 0.000697 | Gtpbp2   |
| 95.5487 | 60.6131 | 211.95487 | 225.59886 | -1.490246293 | 5.40E-05 | 0.000703 | Rec8     |

|         |         |           |           |              |          |          |          |
|---------|---------|-----------|-----------|--------------|----------|----------|----------|
| 2110.38 | 2796.22 | 3918.5591 | 5081.4618 | -0.874614152 | 5.47E-05 | 0.00071  | Are11    |
| 84.1244 | 43.6771 | 281.44827 | 174.38182 | -1.842314989 | 5.65E-05 | 0.000732 | Naip5    |
| 653.262 | 673.875 | 1038.0577 | 1376.7628 | -0.862133131 | 5.66E-05 | 0.000732 | Gm13456  |
| 2.07714 | 1.78274 | 76.44274  | 19.511252 | -4.648233615 | 5.66E-05 | 0.000732 | Trem2    |
| 525.518 | 431.422 | 803.51743 | 979.22098 | -0.897299219 | 5.70E-05 | 0.000735 | Sec24d   |
| 742.579 | 764.794 | 1186.5998 | 1220.6727 | -0.674987818 | 5.73E-05 | 0.000739 | Cln3     |
| 1738.57 | 1788.09 | 2650.3045 | 2629.1413 | -0.582040904 | 5.76E-05 | 0.000742 | Mapk3    |
| 219.139 | 280.781 | 715.78202 | 456.07553 | -1.230063951 | 5.86E-05 | 0.000752 | Clic5    |
| 2.07714 | 10.6964 | 61.675392 | 65.850477 | -3.290990396 | 5.86E-05 | 0.000752 | Gipc2    |
| 587.832 | 975.157 | 1468.9167 | 2036.487  | -1.163860788 | 5.89E-05 | 0.000756 | Crabp2   |
| 772.698 | 854.823 | 1392.474  | 1268.2314 | -0.709300105 | 5.94E-05 | 0.000762 | Zeb2     |
| 6.23143 | 16.936  | 52.988717 | 136.57877 | -3.013887249 | 5.96E-05 | 0.000763 | Ighv1-23 |
| 120.474 | 32.9806 | 1022.4216 | 675.57712 | -3.470284328 | 6.03E-05 | 0.000771 | Sirpa    |
| 921.214 | 301.283 | 6021.6031 | 4314.4257 | -3.080119514 | 6.08E-05 | 0.000775 | Ccl9     |
| 6.23143 | 3.56547 | 72.099402 | 34.144692 | -3.458583095 | 6.09E-05 | 0.000776 | Osbp2    |
| 1342.87 | 1405.69 | 2030.9446 | 2247.4524 | -0.637752908 | 6.15E-05 | 0.000783 | Glrx     |
| 67.5072 | 15.1533 | 923.39355 | 501.1953  | -4.110574487 | 6.17E-05 | 0.000785 | Il6      |
| 99.703  | 318.219 | 1678.2656 | 1680.4066 | -3.005613484 | 6.21E-05 | 0.000789 | Abca1    |
| 131.899 | 155.99  | 280.5796  | 490.22022 | -1.41678344  | 6.33E-05 | 0.000803 | Gm37169  |
| 3902.96 | 5373.17 | 7480.9645 | 9289.7951 | -0.854039751 | 6.33E-05 | 0.000803 | Glipr2   |
| 91.3944 | 146.184 | 250.17624 | 590.21539 | -1.818115901 | 6.43E-05 | 0.000813 | Irf6     |
| 1721.95 | 2159.79 | 3022.0942 | 3671.7738 | -0.785408779 | 6.44E-05 | 0.000813 | Rbl2     |
| 1052.07 | 621.284 | 1922.3612 | 1647.4814 | -1.09431961  | 6.48E-05 | 0.000818 | Fut8     |
| 5.19286 | 11.5878 | 48.64538  | 84.142276 | -2.964378011 | 6.50E-05 | 0.00082  | Sema4g   |
| 11.4243 | 11.5878 | 62.54406  | 67.06993  | -2.492571447 | 6.51E-05 | 0.00082  | Samd11   |
| 4980.99 | 6876.91 | 11130.237 | 9667.8256 | -0.810542683 | 6.55E-05 | 0.000825 | Man1a    |
| 208.753 | 287.912 | 462.13111 | 741.42759 | -1.273575377 | 6.88E-05 | 0.000865 | Errfi1   |
| 10289.1 | 11060.1 | 15306.79  | 20569.738 | -0.748713274 | 7.05E-05 | 0.000885 | Rps15a   |
| 19.7329 | 23.1756 | 79.91741  | 101.21462 | -2.072129069 | 7.06E-05 | 0.000885 | Il4      |
| 1474.77 | 1901.29 | 2883.9761 | 2771.8173 | -0.744025199 | 7.06E-05 | 0.000885 | Dnajc1   |
| 935.754 | 1183.74 | 1699.9823 | 3657.1404 | -1.336887972 | 7.07E-05 | 0.000886 | Als2cl   |
| 211.869 | 244.235 | 411.74839 | 518.26764 | -1.024878242 | 7.13E-05 | 0.000891 | Emc9     |
| 1791.54 | 2018.95 | 2818.826  | 3210.8205 | -0.661437781 | 7.13E-05 | 0.000891 | Kdm5b    |
| 228.486 | 286.129 | 491.6658  | 509.73147 | -0.958513885 | 7.22E-05 | 0.000901 | Thap6    |
| 10548.8 | 11650.2 | 15775.002 | 18994.204 | -0.647174922 | 7.23E-05 | 0.000901 | Fmnl1    |
| 750.888 | 628.415 | 1111.0257 | 1263.3536 | -0.783590998 | 7.26E-05 | 0.000904 | Tmem63a  |
| 1527.74 | 1948.53 | 2779.736  | 3046.1943 | -0.744276914 | 7.29E-05 | 0.000906 | Arl5a    |
| 2463.49 | 2312.21 | 3877.7317 | 3432.761  | -0.614742793 | 7.40E-05 | 0.000918 | Cited2   |
| 2805.18 | 4176.06 | 6620.115  | 6143.6056 | -0.870299964 | 7.52E-05 | 0.000931 | Tnfaip3  |
| 71.6615 | 54.3735 | 499.48381 | 128.04259 | -2.320187064 | 7.68E-05 | 0.000949 | Parvb    |
| 1531.89 | 1906.64 | 3011.6702 | 2685.2361 | -0.728290329 | 8.02E-05 | 0.000984 | Fam3c    |
| 45.6972 | 40.1116 | 151.14814 | 118.28697 | -1.655433919 | 8.22E-05 | 0.001008 | Il10     |
| 653.262 | 685.463 | 1033.7143 | 1179.2113 | -0.723923421 | 8.23E-05 | 0.001008 | G6pc3    |
| 733.232 | 817.385 | 1204.8418 | 1327.9846 | -0.706798136 | 8.37E-05 | 0.001024 | Asah1    |
| 427.892 | 438.553 | 712.30735 | 754.84158 | -0.759098293 | 8.38E-05 | 0.001024 | Arfgap3  |

|         |         |           |           |              |          |          |               |
|---------|---------|-----------|-----------|--------------|----------|----------|---------------|
| 892.134 | 1040.23 | 1499.3201 | 1679.1872 | -0.716892291 | 8.39E-05 | 0.001025 | Actn1         |
| 1311.72 | 1351.31 | 1999.6726 | 3023.0247 | -0.914552518 | 8.44E-05 | 0.00103  | Ppmlj         |
| 1605.63 | 1541.18 | 2624.2445 | 2280.3776 | -0.640928546 | 8.61E-05 | 0.001048 | Mafg          |
| 98.6644 | 48.1339 | 415.22306 | 178.04018 | -2.021381301 | 8.78E-05 | 0.001065 | Cd300a        |
| 218.1   | 370.809 | 613.27925 | 749.96377 | -1.208089713 | 8.95E-05 | 0.001084 | Cd96          |
| 82.0472 | 106.964 | 201.53086 | 336.56911 | -1.503902529 | 8.96E-05 | 0.001085 | Smpd5         |
| 39.4658 | 72.2009 | 146.80481 | 269.49918 | -1.890350343 | 9.06E-05 | 0.001096 | Gm33994       |
| 890.057 | 903.848 | 1348.172  | 1474.319  | -0.653193501 | 9.23E-05 | 0.001114 | Rpl34-ps1     |
| 154887  | 188815  | 251696.41 | 305288.91 | -0.696469279 | 9.62E-05 | 0.001154 | mt-Co1        |
| 462.165 | 368.135 | 753.13472 | 740.20814 | -0.848222909 | 9.64E-05 | 0.001155 | Rab37         |
| 130.86  | 43.6771 | 514.25116 | 243.89066 | -2.124802583 | 9.69E-05 | 0.00116  | Angpt1        |
| 1112.31 | 1085.69 | 1718.2243 | 1641.3841 | -0.612494177 | 9.70E-05 | 0.00116  | Chpf2         |
| 550.443 | 590.086 | 911.2322  | 956.05137 | -0.710424244 | 9.71E-05 | 0.001161 | Atg9a         |
| 24.9257 | 2.67411 | 92.947422 | 158.52893 | -3.203628484 | 9.84E-05 | 0.001172 | Hoxa9         |
| 2749.1  | 3518.23 | 4786.3579 | 6425.2993 | -0.838593236 | 9.89E-05 | 0.001176 | Paxbp1        |
| 1477.89 | 1838.89 | 2645.9612 | 2724.2586 | -0.694654638 | 9.97E-05 | 0.001184 | Slc30a9       |
| 71.6615 | 42.7857 | 189.36951 | 160.96783 | -1.62086206  | 9.97E-05 | 0.001184 | Bsn           |
| 100.742 | 227.299 | 416.09173 | 563.38742 | -1.57404283  | 0.000101 | 0.0012   | Nyap1         |
| 407.12  | 374.375 | 637.60194 | 753.62213 | -0.831142114 | 0.000104 | 0.001225 | Selenon       |
| 1499.7  | 1873.66 | 2590.3665 | 3109.6059 | -0.755943646 | 0.000104 | 0.001225 | Plxnc1        |
| 1053.11 | 1305.86 | 1826.8077 | 2502.3181 | -0.874776611 | 0.000105 | 0.001238 | H2-Q5         |
| 31.1572 | 14.2619 | 82.523412 | 141.45658 | -2.30750535  | 0.000106 | 0.001248 | Ttyh2         |
| 386.349 | 359.222 | 607.19858 | 832.88659 | -0.948134352 | 0.000107 | 0.001255 | Polr3gl       |
| 3752.36 | 4217.96 | 5938.211  | 5855.8147 | -0.565224823 | 0.000107 | 0.001261 | Gabarap       |
| 284.569 | 346.742 | 633.2586  | 549.97343 | -0.906253978 | 0.000108 | 0.00127  | Cers6         |
| 1942.13 | 2486.03 | 3742.2196 | 3508.3671 | -0.711169392 | 0.000109 | 0.001273 | Ehd1          |
| 3.11572 | 3.56547 | 49.514047 | 31.705785 | -3.604516661 | 0.00011  | 0.001281 | Sash1         |
| 1039.61 | 1017.94 | 1659.1549 | 1523.0971 | -0.62974123  | 0.000111 | 0.001293 | Ndst2         |
| 1897.47 | 1996.67 | 2880.5014 | 2858.3985 | -0.559367263 | 0.000111 | 0.001294 | Ldlr          |
| 280.415 | 435.879 | 667.13664 | 934.10121 | -1.157856774 | 0.000112 | 0.001306 | F730043M19Rik |
| 4104.44 | 4848.15 | 6577.5503 | 9461.738  | -0.840896823 | 0.000112 | 0.001306 | Ccnl2         |
| 871.362 | 1073.21 | 1514.9561 | 2247.4524 | -0.950912497 | 0.000112 | 0.001309 | Dlg4          |
| 15.5786 | 0.89137 | 92.078754 | 89.020089 | -3.485539617 | 0.000113 | 0.001312 | Klra2         |
| 431.008 | 564.236 | 897.33352 | 891.42035 | -0.844654044 | 0.000113 | 0.001312 | Dcun1d3       |
| 57.1215 | 100.725 | 171.1275  | 478.02569 | -2.034488641 | 0.000113 | 0.001318 | Adamtsl4      |
| 65.4301 | 98.9419 | 196.31885 | 251.20738 | -1.439082583 | 0.000114 | 0.001321 | 2310015A10Rik |
| 4583.22 | 4870.44 | 8045.5983 | 6630.1675 | -0.634695292 | 0.000114 | 0.001321 | H2-T22        |
| 4942.57 | 4613.72 | 6811.2218 | 9298.3313 | -0.753170277 | 0.000114 | 0.001321 | Icos          |
| 346.883 | 299.5   | 556.81586 | 610.94609 | -0.853407492 | 0.000114 | 0.001321 | Tiparp        |
| 35.3115 | 87.3541 | 180.68284 | 293.88824 | -1.94398391  | 0.000115 | 0.001325 | Ugt1a7c       |
| 626.259 | 520.559 | 951.19091 | 992.63497 | -0.761857194 | 0.000116 | 0.001335 | Nol8          |
| 293.916 | 336.937 | 556.81586 | 571.92359 | -0.838083276 | 0.000117 | 0.001353 | Qprt          |
| 101.78  | 151.533 | 262.33758 | 412.17521 | -1.407765353 | 0.000119 | 0.001369 | BC026585      |
| 56.0829 | 16.0446 | 193.71285 | 151.21221 | -2.268113992 | 0.00012  | 0.001373 | Ltbr          |
| 1180.86 | 1346.86 | 1884.1398 | 2174.2852 | -0.68213081  | 0.000122 | 0.001392 | Cnn3          |

|         |         |           |           |              |          |          |          |
|---------|---------|-----------|-----------|--------------|----------|----------|----------|
| 111.127 | 120.335 | 225.85355 | 368.27489 | -1.355846319 | 0.000122 | 0.001398 | Prkra    |
| 268.99  | 334.263 | 827.84012 | 514.60928 | -1.155231032 | 0.000122 | 0.001398 | mt-Atp6  |
| 766.466 | 653.373 | 1157.9338 | 1163.3584 | -0.709885137 | 0.000123 | 0.001399 | Heatr5a  |
| 2.07714 | 0.89137 | 33.878032 | 32.925239 | -4.522358189 | 0.000123 | 0.001405 | Slco2b1  |
| 152.67  | 86.4628 | 375.26436 | 274.37699 | -1.447149574 | 0.000124 | 0.001415 | Arhgap23 |
| 164.094 | 177.382 | 331.83098 | 342.66637 | -0.98088693  | 0.000126 | 0.00143  | Map4k3   |
| 7.27001 | 2.67411 | 45.17071  | 48.778131 | -3.262353617 | 0.000127 | 0.001441 | Slc22a4  |
| 2.07714 | 18.7187 | 70.362067 | 128.04259 | -3.230692892 | 0.000128 | 0.001448 | Tmem171  |
| 240.949 | 429.64  | 1136.2171 | 640.21297 | -1.405368378 | 0.000129 | 0.00146  | Tle1     |
| 1675.22 | 2034.1  | 2797.1093 | 3204.7232 | -0.693535191 | 0.000131 | 0.001478 | Insig1   |
| 70.6229 | 17.8274 | 651.50062 | 404.85849 | -3.581688774 | 0.000133 | 0.001492 | C3ar1    |
| 130.86  | 162.229 | 332.69965 | 292.66879 | -1.09284819  | 0.000133 | 0.001494 | Ccr12    |
| 1167.36 | 1226.52 | 1757.3143 | 1891.372  | -0.60742514  | 0.000134 | 0.001501 | Nipal3   |
| 6.23143 | 41.8943 | 131.16879 | 202.42924 | -2.779988746 | 0.000136 | 0.001519 | Hc       |
| 1316.91 | 1501.96 | 2096.9633 | 2302.3278 | -0.641396514 | 0.000136 | 0.00152  | Parp4    |
| 1193.32 | 1246.13 | 1785.9804 | 1920.6389 | -0.602973711 | 0.000137 | 0.001523 | Ell      |
| 544.212 | 516.994 | 844.3448  | 880.44527 | -0.700641475 | 0.00014  | 0.001559 | Fam105a  |
| 1818.54 | 2046.58 | 3201.9084 | 2799.8647 | -0.635057977 | 0.000143 | 0.00158  | Gbp7     |
| 78.9315 | 37.4375 | 221.51021 | 169.50401 | -1.756342278 | 0.000143 | 0.001585 | Tns3     |
| 149.554 | 126.574 | 269.28692 | 330.47184 | -1.118354296 | 0.000144 | 0.001587 | Acss1    |
| 92.4329 | 113.204 | 217.16687 | 265.84082 | -1.227751345 | 0.000145 | 0.001597 | Gm2237   |
| 1351.18 | 1616.05 | 2226.3948 | 2609.63   | -0.703811598 | 0.000145 | 0.001599 | Zdhhc21  |
| 82.0472 | 106.964 | 276.23626 | 201.20979 | -1.337430753 | 0.000145 | 0.001601 | Ctbp2    |
| 26678.8 | 27188.5 | 40923.794 | 36560.429 | -0.524526987 | 0.000147 | 0.001615 | Laptm5   |
| 1045.84 | 1246.13 | 2016.1773 | 1737.7209 | -0.711919355 | 0.000147 | 0.001615 | Eif4ebp1 |
| 38.4272 | 58.8303 | 127.69412 | 189.01526 | -1.695350616 | 0.000147 | 0.001615 | Aebp1    |
| 601.333 | 799.558 | 1165.7518 | 1325.5457 | -0.829053897 | 0.000148 | 0.001618 | Epm2aip1 |
| 270.029 | 110.53  | 608.93591 | 503.6342  | -1.551117924 | 0.000148 | 0.001618 | P2ry1    |
| 5094.2  | 5740.41 | 7655.5666 | 9230.0419 | -0.639856521 | 0.000148 | 0.001621 | Fnbp1    |
| 606.526 | 760.337 | 1156.1964 | 1152.3834 | -0.755250628 | 0.000149 | 0.001625 | Smad7    |
| 212.907 | 157.772 | 415.22306 | 360.95817 | -1.069613402 | 0.00015  | 0.001637 | Nrgn     |
| 95.5487 | 140.836 | 264.94359 | 295.10769 | -1.240234047 | 0.00015  | 0.001639 | Wdr78    |
| 0       | 0       | 39.958705 | 10.97508  | -7.176389625 | 0.000152 | 0.001657 | Pira2    |
| 8637.81 | 9294.3  | 12384.592 | 14462.716 | -0.582065819 | 0.000154 | 0.001672 | Rpl37    |
| 637.683 | 623.067 | 967.69559 | 1045.0715 | -0.674380116 | 0.000155 | 0.001684 | Lamtor4  |
| 5050.58 | 4621.75 | 7722.454  | 6755.7712 | -0.582240956 | 0.000156 | 0.00169  | Slc3a2   |
| 105.934 | 70.4181 | 257.12558 | 202.42924 | -1.387485875 | 0.000156 | 0.00169  | Pik3r6   |
| 2390.79 | 2554.66 | 3516.366  | 3733.9659 | -0.551599453 | 0.000157 | 0.001701 | Reep5    |
| 241.987 | 297.717 | 459.5251  | 828.00878 | -1.251432806 | 0.000158 | 0.001704 | Neil1    |
| 537.981 | 685.463 | 1009.3916 | 1117.0192 | -0.795935776 | 0.00016  | 0.001722 | Plcb3    |
| 7.27001 | 12.4792 | 53.857385 | 65.850477 | -2.586802755 | 0.00016  | 0.001722 | Xcr1     |
| 793.469 | 852.148 | 1224.8212 | 1503.5859 | -0.728102779 | 0.000161 | 0.001733 | Rfk      |
| 544.212 | 634.654 | 922.52488 | 1713.3319 | -1.159288592 | 0.000163 | 0.001749 | Arhgap18 |
| 220.177 | 447.467 | 792.22476 | 825.56987 | -1.274818404 | 0.000163 | 0.00175  | Syngap1  |
| 1236.94 | 1517.11 | 2209.8901 | 2174.2852 | -0.670301854 | 0.000165 | 0.001772 | Fhl3     |

|         |         |           |           |              |          |          |          |
|---------|---------|-----------|-----------|--------------|----------|----------|----------|
| 14.54   | 16.936  | 58.200722 | 96.336809 | -2.28779923  | 0.000167 | 0.001783 | Ap1m2    |
| 44.6586 | 114.987 | 191.10685 | 507.29256 | -2.123260175 | 0.000167 | 0.001791 | Enpp1    |
| 9049.08 | 9181.99 | 12656.485 | 17034.543 | -0.703473107 | 0.000168 | 0.001794 | Rpl34    |
| 6006.06 | 6217.3  | 8382.6413 | 9592.2195 | -0.556130259 | 0.000168 | 0.001795 | Slc44a2  |
| 393.619 | 460.838 | 750.52872 | 712.16072 | -0.775060467 | 0.00017  | 0.001812 | Dhrs11   |
| 11.4243 | 22.2842 | 86.866749 | 74.38665  | -2.249414243 | 0.000171 | 0.00182  | Styk1    |
| 2.07714 | 13.3705 | 132.03746 | 40.241958 | -3.462491863 | 0.000171 | 0.00182  | Kctd8    |
| 540.058 | 884.238 | 1369.02   | 1469.4412 | -0.993609851 | 0.000172 | 0.001823 | Fyco1    |
| 3.11572 | 7.13095 | 56.463387 | 37.803052 | -3.187002909 | 0.000175 | 0.001857 | Cp       |
| 2025.22 | 2769.48 | 3737.8762 | 4794.8903 | -0.83097144  | 0.000178 | 0.001885 | Arap2    |
| 497.476 | 771.925 | 1135.3484 | 1384.0795 | -0.987276559 | 0.00018  | 0.001905 | Mfsd2a   |
| 1643.02 | 2373.71 | 3873.3884 | 3301.06   | -0.836680603 | 0.000181 | 0.001906 | Pcgf5    |
| 4487.67 | 4893.61 | 6693.9517 | 10562.904 | -0.879027267 | 0.000183 | 0.001934 | Txnip    |
| 343.767 | 404.681 | 606.32991 | 917.02887 | -1.022726996 | 0.000184 | 0.00194  | Cul9     |
| 38.4272 | 20.5015 | 110.32077 | 109.7508  | -1.909040335 | 0.000187 | 0.001966 | Pon3     |
| 782.045 | 890.477 | 1257.8305 | 1792.5963 | -0.86553191  | 0.000189 | 0.001979 | Tspoap1  |
| 155.786 | 246.018 | 393.50638 | 551.19288 | -1.22938335  | 0.000189 | 0.001979 | Zfp983   |
| 1302.37 | 1113.32 | 1896.3011 | 1857.2273 | -0.636402153 | 0.000191 | 0.001996 | Tmem64   |
| 27.0029 | 34.7634 | 82.523412 | 169.50401 | -2.020492101 | 0.000193 | 0.002011 | Rab34    |
| 17.6557 | 1.78274 | 82.523412 | 91.458996 | -3.184555795 | 0.000195 | 0.002039 | Kcnj2    |
| 1262.9  | 1185.52 | 1792.061  | 2763.2811 | -0.894945084 | 0.000197 | 0.002049 | Prrc1    |
| 686.496 | 656.047 | 1207.4478 | 1002.3906 | -0.720359638 | 0.000203 | 0.0021   | Ppp1r15a |
| 1506.97 | 1813.04 | 2524.3477 | 2642.5553 | -0.637538419 | 0.000205 | 0.002114 | Gsdmd    |
| 611.719 | 1419.06 | 2572.1245 | 2374.2755 | -1.283699984 | 0.000209 | 0.002156 | Gpr65    |
| 965.872 | 1022.4  | 1445.4627 | 1766.9878 | -0.691024471 | 0.00021  | 0.002164 | Klhdc2   |
| 2524.77 | 2279.23 | 3393.8839 | 3999.8068 | -0.621808694 | 0.000212 | 0.002181 | Cd164    |
| 27.0029 | 8.02232 | 105.97743 | 85.36173  | -2.465338062 | 0.000212 | 0.002181 | Rnase6   |
| 1542.28 | 1371.82 | 3082.9009 | 2118.1903 | -0.836678802 | 0.000212 | 0.002181 | Alas1    |
| 3298.51 | 3506.64 | 4768.1159 | 6470.4191 | -0.723329961 | 0.000212 | 0.002186 | Plcg1    |
| 214.984 | 147.076 | 337.91166 | 545.09562 | -1.285663102 | 0.000215 | 0.002207 | Rell1    |
| 68.5458 | 122.118 | 213.6922  | 349.98309 | -1.557653709 | 0.000216 | 0.002215 | Gm16350  |
| 10828.2 | 10826.6 | 14741.287 | 18346.675 | -0.611498107 | 0.000217 | 0.00222  | Rpl26    |
| 33.2343 | 31.1979 | 123.35078 | 91.458996 | -1.741711701 | 0.000217 | 0.00222  | Fer      |
| 8.30858 | 9.80506 | 39.090037 | 84.142276 | -2.756353536 | 0.00022  | 0.002246 | Piwil4   |
| 730.116 | 720.226 | 1094.521  | 1151.1639 | -0.630420489 | 0.000221 | 0.00226  | Klhl25   |
| 13.5014 | 27.6324 | 127.69412 | 70.72829  | -2.265827589 | 0.000226 | 0.002298 | Itgax    |
| 1563.05 | 1330.81 | 2123.892  | 3194.9676 | -0.877627745 | 0.000229 | 0.00233  | Tbc1d2b  |
| 98.6644 | 98.9419 | 203.26819 | 239.01284 | -1.160251723 | 0.000229 | 0.00233  | Sult2b1  |
| 692.728 | 500.949 | 1296.9206 | 978.00153 | -0.932348226 | 0.00023  | 0.00233  | Atp6v0a1 |
| 6.23143 | 0       | 39.958705 | 59.753211 | -4.046877893 | 0.000231 | 0.002346 | Mfsd7a   |
| 8930.68 | 8927.06 | 12417.602 | 12309.161 | -0.469535689 | 0.000232 | 0.002347 | Cd47     |
| 908.751 | 839.669 | 1289.1026 | 1853.569  | -0.844973962 | 0.000232 | 0.002354 | Rcn1     |
| 985.605 | 1197.11 | 1656.5489 | 1886.4942 | -0.697783832 | 0.000233 | 0.002357 | Cstb     |
| 4988.26 | 6031    | 7951.7822 | 9147.1191 | -0.633602626 | 0.000233 | 0.002361 | H2-Q6    |
| 1232.79 | 1373.6  | 1883.2711 | 2420.6148 | -0.72255567  | 0.000234 | 0.002363 | Fam173a  |



|         |         |           |           |              |          |          |          |
|---------|---------|-----------|-----------|--------------|----------|----------|----------|
| 286.646 | 367.244 | 622.83459 | 571.92359 | -0.868830407 | 0.000238 | 0.002399 | Fam213a  |
| 774.775 | 993.876 | 1361.202  | 1970.6365 | -0.912225122 | 0.000239 | 0.002409 | Fbx15    |
| 3638.12 | 3799.01 | 5177.2583 | 7115.5099 | -0.724610726 | 0.00024  | 0.002416 | Spata13  |
| 1010.53 | 1064.29 | 1495.8454 | 1827.9605 | -0.678753421 | 0.000246 | 0.002466 | Mrpl33   |
| 2488.42 | 2673.21 | 3618.8688 | 4855.863  | -0.714781876 | 0.000251 | 0.00251  | Ap3b1    |
| 3476.1  | 3717.01 | 4985.2828 | 6491.1498 | -0.673571737 | 0.000261 | 0.002603 | Cox7a2l  |
| 163.056 | 463.512 | 853.90015 | 971.90426 | -1.540904411 | 0.000261 | 0.002603 | Dnm1     |
| 1024.03 | 991.202 | 1458.4927 | 1607.2394 | -0.604799432 | 0.000264 | 0.002627 | Ube2a    |
| 3.11572 | 13.3705 | 104.2401  | 41.461412 | -3.129177479 | 0.000266 | 0.002644 | Coch     |
| 1287.83 | 1500.17 | 2072.6406 | 2202.3326 | -0.616000662 | 0.000269 | 0.002671 | Pqlc3    |
| 56.0829 | 95.3764 | 188.50085 | 224.3794  | -1.440732318 | 0.000276 | 0.002732 | Prss30   |
| 12.4629 | 14.2619 | 46.908045 | 101.21462 | -2.461809788 | 0.000277 | 0.00274  | Gzmf     |
| 659.493 | 796.884 | 1122.3184 | 1291.401  | -0.727396271 | 0.00028  | 0.002764 | Slc35a2  |
| 1.03857 | 0       | 93.816089 | 7.3167197 | -6.707211052 | 0.00028  | 0.002765 | Ngp      |
| 3067.94 | 4743.86 | 6435.9575 | 7839.8651 | -0.869508073 | 0.000283 | 0.002788 | Zfp281   |
| 705.191 | 1237.22 | 2063.954  | 1848.6912 | -1.009689136 | 0.000283 | 0.002788 | Fads2    |
| 601.333 | 494.71  | 846.95081 | 1247.5007 | -0.933383661 | 0.000291 | 0.002851 | Rgs10    |
| 5173.13 | 5119.13 | 7285.5143 | 7050.8789 | -0.478204491 | 0.000293 | 0.002868 | Surf4    |
| 614.835 | 594.543 | 899.93952 | 1098.7274 | -0.723592013 | 0.000295 | 0.002882 | Pi4k2b   |
| 190.059 | 57.939  | 1063.249  | 765.81666 | -2.8843364   | 0.000298 | 0.002914 | Cd200r4  |
| 789.315 | 270.085 | 4194.7953 | 2857.179  | -2.73518711  | 0.000301 | 0.002935 | Il1rl1   |
| 223.293 | 243.344 | 393.50638 | 481.68405 | -0.904669539 | 0.000301 | 0.00294  | Cd99l2   |
| 59.1986 | 99.8333 | 164.17816 | 385.34724 | -1.782762399 | 0.000302 | 0.002941 | Pycr1    |
| 208.753 | 222.842 | 375.26436 | 419.49193 | -0.878997679 | 0.000302 | 0.002948 | Ppt2     |
| 2566.31 | 2885.36 | 4122.6959 | 3868.1058 | -0.551619652 | 0.000308 | 0.002986 | Vmp1     |
| 1636.79 | 1813.04 | 2443.5617 | 2781.5729 | -0.598227372 | 0.000309 | 0.002995 | Ptpn3    |
| 1114.39 | 1731.04 | 2453.9857 | 2759.6228 | -0.87286245  | 0.000309 | 0.002995 | Mvd      |
| 5775.5  | 6661.2  | 8682.3316 | 11887.231 | -0.725648076 | 0.000312 | 0.00302  | H2-Q7    |
| 264.836 | 207.689 | 540.31118 | 406.07794 | -1.005534338 | 0.000316 | 0.003054 | Acss2    |
| 588.871 | 677.44  | 965.08959 | 1101.1663 | -0.704871153 | 0.000318 | 0.003071 | Surf1    |
| 473.589 | 258.497 | 909.49487 | 723.1358  | -1.159522711 | 0.000318 | 0.003071 | Ptpre    |
| 9.34715 | 5.34821 | 59.938057 | 40.241958 | -2.784994976 | 0.000321 | 0.003091 | Colla2   |
| 187.982 | 274.542 | 476.89845 | 452.41717 | -1.00480568  | 0.000321 | 0.003093 | Tmem159  |
| 66.4686 | 73.9836 | 121.61345 | 485.34241 | -2.10791051  | 0.000328 | 0.003146 | Wscd2    |
| 319.88  | 331.589 | 535.96784 | 563.38742 | -0.754063771 | 0.000333 | 0.003187 | Agpat2   |
| 232.64  | 218.385 | 396.11238 | 414.61412 | -0.845995327 | 0.000333 | 0.003187 | Mettl7a1 |
| 31.1572 | 88.2455 | 179.81417 | 263.40191 | -1.884360238 | 0.000333 | 0.003187 | Cables1  |
| 361.423 | 590.977 | 885.17218 | 1026.7797 | -1.003468278 | 0.000335 | 0.003197 | Ptpn13   |
| 57.1215 | 8.02232 | 243.2269  | 156.09002 | -2.626152276 | 0.000335 | 0.003197 | Alox8    |
| 98.6644 | 20.5015 | 632.38994 | 817.0337  | -3.606718741 | 0.000335 | 0.003197 | Rab38    |
| 3.11572 | 0.89137 | 125.95679 | 4.8778131 | -5.059279396 | 0.000336 | 0.003205 | Chil3    |
| 9628.6  | 7777.19 | 16734.011 | 12372.573 | -0.741967523 | 0.000338 | 0.003223 | Ftl1     |
| 6.23143 | 12.4792 | 49.514047 | 63.411571 | -2.577900334 | 0.000338 | 0.003223 | Flywch2  |
| 1.03857 | 8.02232 | 52.988717 | 43.900318 | -3.386710351 | 0.000342 | 0.003254 | Glrp1    |
| 261.72  | 218.385 | 435.20241 | 437.78373 | -0.86393052  | 0.000347 | 0.003294 | Idh1     |

|         |         |           |           |              |          |          |               |
|---------|---------|-----------|-----------|--------------|----------|----------|---------------|
| 7.27001 | 9.80506 | 59.06939  | 43.900318 | -2.589607617 | 0.000348 | 0.003298 | Mmp19         |
| 285.607 | 271.867 | 459.5251  | 517.04819 | -0.807914072 | 0.000349 | 0.003307 | Dpm3          |
| 672.995 | 1025.07 | 2006.6219 | 1384.0795 | -0.997738252 | 0.000349 | 0.003307 | Ddx58         |
| 220.177 | 74.875  | 504.69581 | 423.15029 | -1.656766084 | 0.00035  | 0.003314 | Rnf217        |
| 372.847 | 360.113 | 603.72391 | 604.84883 | -0.721728103 | 0.000351 | 0.003315 | Gk            |
| 172.403 | 242.452 | 371.78969 | 531.68163 | -1.118918256 | 0.000351 | 0.003315 | Tmem35b       |
| 16.6172 | 16.0446 | 98.159427 | 53.655944 | -2.22313911  | 0.000351 | 0.003315 | Pde1c         |
| 449.702 | 741.619 | 1044.1383 | 1424.3214 | -1.049235392 | 0.000352 | 0.00332  | Sik1          |
| 174.48  | 276.324 | 438.67708 | 524.36491 | -1.091721118 | 0.000357 | 0.003363 | Amigo2        |
| 69.5844 | 28.5238 | 152.88548 | 187.79581 | -1.801718052 | 0.000359 | 0.00338  | Enpp5         |
| 1499.7  | 1648.14 | 2262.0102 | 2365.7394 | -0.555465919 | 0.00036  | 0.003388 | Slc25a1       |
| 377.002 | 396.659 | 610.67325 | 674.35766 | -0.730701862 | 0.000362 | 0.003401 | Rufy3         |
| 27.0029 | 49.9166 | 82.523412 | 303.64387 | -2.320076267 | 0.000365 | 0.003421 | Sv2c          |
| 656.378 | 1083.01 | 1587.9242 | 1754.7933 | -0.941326673 | 0.000366 | 0.003431 | BE692007      |
| 1477.89 | 1610.7  | 2195.1228 | 3764.4523 | -0.947513258 | 0.000369 | 0.003448 | Pold4         |
| 307.417 | 230.864 | 523.8065  | 482.9035  | -0.905653558 | 0.000369 | 0.00345  | Dnase2a       |
| 2.07714 | 2.67411 | 49.514047 | 20.730706 | -3.886269171 | 0.00037  | 0.003462 | I830127L07Rik |
| 5675.8  | 6701.31 | 9295.6109 | 8870.3032 | -0.553493937 | 0.000371 | 0.003467 | Slc16a3       |
| 3.11572 | 5.34821 | 39.958705 | 36.583598 | -3.164302024 | 0.000377 | 0.003513 | Inpp5j        |
| 0       | 1.78274 | 37.352702 | 23.169612 | -5.013819369 | 0.000378 | 0.003516 | Mcemp1        |
| 1303.41 | 1163.24 | 1760.789  | 2115.7514 | -0.651775108 | 0.000382 | 0.003541 | Gm7536        |
| 282.492 | 227.299 | 452.57576 | 476.80623 | -0.867392567 | 0.000382 | 0.003546 | Inpp5a        |
| 5806.66 | 3760.68 | 8479.9321 | 8227.6513 | -0.804523597 | 0.000388 | 0.003591 | Nucb1         |
| 253.412 | 120.335 | 769.6394  | 362.17762 | -1.602198228 | 0.000399 | 0.003669 | Ptger3        |
| 34.2729 | 25.8497 | 92.947422 | 102.43408 | -1.703129906 | 0.000407 | 0.003737 | Rprm          |
| 745.695 | 890.477 | 1244.8005 | 1352.3737 | -0.665472929 | 0.00041  | 0.00376  | Mindy2        |
| 4533.37 | 5539.86 | 8276.6639 | 7189.8965 | -0.618640588 | 0.000411 | 0.003765 | Cd52          |
| 4.15429 | 0       | 62.54406  | 21.950159 | -4.40708224  | 0.000411 | 0.003765 | Sp5           |
| 2548.66 | 943.959 | 12742.483 | 8209.3595 | -2.58482735  | 0.000415 | 0.003799 | Cpa3          |
| 566.022 | 763.903 | 1165.7518 | 1104.8247 | -0.770954882 | 0.000418 | 0.003821 | Sestd1        |
| 2357.56 | 2227.53 | 3178.4544 | 3371.7883 | -0.51450242  | 0.000428 | 0.003902 | Gm2a          |
| 3.11572 | 8.02232 | 90.341419 | 24.389066 | -3.35558905  | 0.000437 | 0.003979 | Slc6a12       |
| 73.7386 | 13.3705 | 246.70157 | 190.23471 | -2.334978161 | 0.000439 | 0.003998 | Pstpip2       |
| 5222.98 | 5676.24 | 7444.4804 | 7943.5187 | -0.497386217 | 0.00044  | 0.004003 | Hmgcr         |
| 4345.39 | 5954.34 | 9372.0536 | 7737.4311 | -0.73217161  | 0.000444 | 0.004037 | Serpine2      |
| 52.9672 | 18.7187 | 130.30012 | 148.7733  | -1.968908081 | 0.000447 | 0.00406  | Dnajc6        |
| 1389.61 | 1737.28 | 2301.1002 | 2721.8197 | -0.682919734 | 0.000448 | 0.00407  | Gm8369        |
| 187.982 | 197.884 | 339.64899 | 369.49434 | -0.876486823 | 0.000452 | 0.004091 | Naaa          |
| 24.9257 | 53.4821 | 105.97743 | 192.67362 | -1.919333695 | 0.000457 | 0.004133 | Ablim2        |
| 140.207 | 174.708 | 396.98105 | 279.2548  | -1.103876301 | 0.000459 | 0.004138 | Slc31a2       |
| 20591.8 | 26451.4 | 37517.749 | 34588.573 | -0.616122951 | 0.000459 | 0.004138 | Lgals1        |
| 657.416 | 678.332 | 977.25093 | 1110.9219 | -0.643471104 | 0.00046  | 0.004151 | Gm10335       |
| 728.039 | 774.599 | 1084.097  | 1395.0546 | -0.720863192 | 0.000463 | 0.00417  | Pigx          |
| 169.287 | 207.689 | 336.17432 | 392.66396 | -0.947970217 | 0.000465 | 0.004184 | Gm18588       |
| 1982.63 | 2298.84 | 3009.9329 | 3596.1677 | -0.625007848 | 0.000467 | 0.004202 | Btg2          |

|         |         |           |           |              |          |          |               |
|---------|---------|-----------|-----------|--------------|----------|----------|---------------|
| 22.8486 | 12.4792 | 142.46147 | 49.997585 | -2.458336756 | 0.000475 | 0.004262 | Car8          |
| 27.0029 | 24.067  | 107.71477 | 73.167197 | -1.830620877 | 0.000482 | 0.004324 | Scarf1        |
| 2249.55 | 2123.24 | 3047.2856 | 3163.2618 | -0.506153855 | 0.000484 | 0.004331 | Esd           |
| 49.8515 | 67.744  | 156.36015 | 146.33439 | -1.361323765 | 0.000484 | 0.004331 | Gm15417       |
| 244.065 | 276.324 | 417.82906 | 615.82391 | -0.986946727 | 0.000485 | 0.004341 | Piwil2        |
| 4576.99 | 4803.59 | 6292.6273 | 7415.4954 | -0.546980333 | 0.000488 | 0.004365 | Wdr26         |
| 485.013 | 583.846 | 834.78946 | 924.34559 | -0.717174358 | 0.000493 | 0.004407 | Trip10        |
| 1181.9  | 1379.84 | 2156.9014 | 1838.9355 | -0.641609415 | 0.000494 | 0.004413 | Zbtb38        |
| 22.8486 | 30.3065 | 74.705405 | 119.50642 | -1.860768271 | 0.000495 | 0.004418 | Gm19557       |
| 45.6972 | 75.7663 | 183.28884 | 151.21221 | -1.45847587  | 0.000497 | 0.004434 | Tnfrsf11b     |
| 9.34715 | 54.3735 | 128.56279 | 230.47667 | -2.483501222 | 0.000501 | 0.00446  | S1pr3         |
| 2134.27 | 1697.17 | 3300.9365 | 2791.3286 | -0.669840317 | 0.000504 | 0.004478 | Lgals9        |
| 1014.69 | 1130.26 | 1603.5602 | 1590.1671 | -0.573950829 | 0.000504 | 0.004478 | Rasa2         |
| 110.089 | 94.4851 | 197.18752 | 260.963   | -1.161601527 | 0.000506 | 0.004492 | Naprt         |
| 1612.9  | 1936.94 | 2658.1225 | 2680.3583 | -0.588249294 | 0.00051  | 0.004523 | Tgfb2         |
| 28.0415 | 20.5015 | 71.230735 | 109.7508  | -1.898215552 | 0.000511 | 0.004526 | Tle6          |
| 847.475 | 2084.91 | 5927.787  | 8832.5001 | -2.331402711 | 0.000513 | 0.004539 | Prf1          |
| 12.4629 | 27.6324 | 69.4934   | 110.97025 | -2.156583438 | 0.000515 | 0.004558 | A330023F24Rik |
| 752.965 | 535.713 | 1197.8925 | 1060.9244 | -0.811248452 | 0.000516 | 0.004563 | Gngl2         |
| 3084.56 | 3872.11 | 4944.4554 | 6630.1675 | -0.734039803 | 0.000517 | 0.004564 | Tnfrsf18      |
| 0       | 1.78274 | 12.161345 | 59.753211 | -5.257383377 | 0.000525 | 0.004616 | Il17a         |
| 2390.79 | 2367.48 | 3218.4131 | 3764.4523 | -0.552935937 | 0.000539 | 0.004727 | Itpr3         |
| 148.516 | 42.7857 | 437.80842 | 267.06027 | -1.886958168 | 0.000541 | 0.004745 | Spns3         |
| 94.5101 | 142.619 | 228.45955 | 360.95817 | -1.308150825 | 0.000541 | 0.004745 | Syng1         |
| 91.3944 | 105.182 | 196.31885 | 231.69612 | -1.119093722 | 0.000542 | 0.004746 | Cystm1        |
| 28638.6 | 28764.5 | 37792.248 | 45888.027 | -0.543709118 | 0.000544 | 0.004766 | Rps14         |
| 245.103 | 244.235 | 410.87973 | 439.00318 | -0.795663949 | 0.000546 | 0.004777 | Slc27a1       |
| 1378.19 | 1723.91 | 2248.9801 | 2838.8872 | -0.712882568 | 0.000554 | 0.004843 | Cbap          |
| 190.059 | 329.806 | 502.08981 | 626.79899 | -1.115548232 | 0.000562 | 0.004883 | AC126459.5    |
| 394.658 | 627.524 | 995.49295 | 937.75957 | -0.918242007 | 0.000568 | 0.004926 | Crebl2        |
| 30.1186 | 6.23958 | 165.91549 | 67.06993  | -2.695534813 | 0.000573 | 0.004963 | B3gnt7        |
| 170.326 | 238.887 | 386.55704 | 413.39466 | -0.9642493   | 0.000583 | 0.005037 | B3gnt5        |
| 3916.46 | 4320.46 | 5581.1887 | 7392.3258 | -0.655007026 | 0.000584 | 0.005042 | Nsa2          |
| 1273.29 | 1647.25 | 2215.1021 | 2423.0537 | -0.666532128 | 0.000587 | 0.005059 | Ssh1          |
| 499.553 | 533.038 | 873.8795  | 769.47502 | -0.671095963 | 0.00061  | 0.005234 | Zfp715        |
| 11.4243 | 11.5878 | 50.382715 | 59.753211 | -2.256322469 | 0.000611 | 0.005239 | Rpl35a-ps3    |
| 3290.2  | 3286.48 | 4394.5889 | 5094.8758 | -0.528624942 | 0.000611 | 0.00524  | Cd37          |
| 266.913 | 256.714 | 407.40506 | 718.25798 | -1.101766963 | 0.000612 | 0.005243 | Mir5125       |
| 197.329 | 306.631 | 501.22114 | 499.97585 | -0.988130048 | 0.000614 | 0.005251 | H2-K2         |
| 3205.03 | 3293.61 | 4432.8102 | 4560.7553 | -0.468616364 | 0.000614 | 0.005251 | Il12rb1       |
| 329.227 | 302.174 | 483.84779 | 804.83917 | -1.02729444  | 0.000615 | 0.005263 | Lgals4        |
| 2.07714 | 0.89137 | 56.463387 | 12.194533 | -4.565343292 | 0.000622 | 0.005307 | Wfdc21        |
| 999.107 | 992.093 | 1402.898  | 1548.7057 | -0.567243069 | 0.000636 | 0.005415 | Fgd3          |
| 87.2401 | 101.616 | 211.0862  | 195.11252 | -1.104305159 | 0.000636 | 0.005415 | Lpar6         |
| 4691.23 | 6721.81 | 12155.264 | 8394.7164 | -0.84849451  | 0.000638 | 0.005427 | Slc6a6        |

|         |         |           |           |              |          |          |               |
|---------|---------|-----------|-----------|--------------|----------|----------|---------------|
| 3209.19 | 3094.83 | 4248.6527 | 5876.5454 | -0.683218739 | 0.000638 | 0.005427 | Xbp1          |
| 146.439 | 288.803 | 455.18177 | 567.04578 | -1.228430053 | 0.000644 | 0.005463 | Gpr162        |
| 0       | 0.89137 | 32.140697 | 23.169612 | -5.858473389 | 0.000647 | 0.005479 | Rassf6        |
| 0       | 0       | 33.009365 | 7.3167197 | -6.840227269 | 0.000648 | 0.005483 | Flrt3         |
| 131.899 | 24.9583 | 893.85885 | 952.39301 | -3.558806466 | 0.000655 | 0.00554  | Tarm1         |
| 7137.07 | 8105.22 | 10320.639 | 11794.552 | -0.53675664  | 0.000661 | 0.005582 | Acap1         |
| 2361.71 | 2642.91 | 3466.852  | 3742.5021 | -0.526167372 | 0.000663 | 0.005598 | Ube2b         |
| 3837.53 | 4855.29 | 6558.4396 | 6525.2945 | -0.589688967 | 0.000666 | 0.005621 | Pitpnm1       |
| 727.001 | 605.239 | 967.69559 | 1662.1148 | -0.980182469 | 0.000674 | 0.005686 | Spred2        |
| 490.206 | 368.135 | 732.2867  | 742.64705 | -0.782292893 | 0.000675 | 0.00569  | Ckap4         |
| 341.69  | 221.951 | 519.46316 | 581.67921 | -0.967489693 | 0.000685 | 0.005756 | Maf           |
| 4968.53 | 5144.09 | 6699.1637 | 8109.3643 | -0.549984487 | 0.000691 | 0.005799 | Gm9794        |
| 247.18  | 178.274 | 416.9604  | 395.10286 | -0.935217866 | 0.000699 | 0.005861 | Milr1         |
| 1.03857 | 3.56547 | 29.534695 | 31.705785 | -3.700674276 | 0.000716 | 0.005987 | Igsf5         |
| 2446.88 | 3003.91 | 3978.4971 | 4149.7995 | -0.576109109 | 0.000719 | 0.006012 | 1700020114Rik |
| 1631.6  | 1698.95 | 2315.8675 | 2399.8841 | -0.501425885 | 0.000724 | 0.006046 | Golga7        |
| 199.406 | 256.714 | 402.19305 | 436.56427 | -0.876295976 | 0.000732 | 0.006102 | Apol7e        |
| 9.34715 | 24.9583 | 74.705405 | 82.922823 | -2.186601414 | 0.000733 | 0.006108 | Sgce          |
| 1205.78 | 1498.39 | 1931.9165 | 2616.9467 | -0.749249828 | 0.000738 | 0.006136 | Gabbr1        |
| 23.8872 | 9.80506 | 115.53278 | 54.875398 | -2.353874044 | 0.000738 | 0.006136 | Adgrl2        |
| 5353.84 | 5637.91 | 7273.3529 | 8709.3353 | -0.53981696  | 0.000738 | 0.006136 | Rpl38         |
| 9.34715 | 14.2619 | 47.776712 | 68.289384 | -2.286073943 | 0.00074  | 0.006138 | Aldh1l2       |
| 75.8158 | 47.2425 | 312.7203  | 118.28697 | -1.815100377 | 0.00074  | 0.006138 | Gm20559       |
| 285.607 | 375.266 | 575.05788 | 582.89867 | -0.807475751 | 0.000743 | 0.006155 | Plpp2         |
| 2176.85 | 2573.38 | 4406.7502 | 3280.3293 | -0.69473086  | 0.000743 | 0.006155 | Uba7          |
| 183.827 | 411.812 | 786.14408 | 645.09079 | -1.263278378 | 0.000743 | 0.006155 | Atp6v0d2      |
| 4511.56 | 4662.75 | 6124.1058 | 6498.4665 | -0.460159391 | 0.000756 | 0.006247 | Ssr3          |
| 209.792 | 205.906 | 342.25499 | 414.61412 | -0.86256113  | 0.000757 | 0.006255 | Rida          |
| 157.863 | 208.58  | 307.50829 | 512.17038 | -1.157299885 | 0.000759 | 0.006263 | Mfap1b        |
| 713.499 | 1296.05 | 1768.607  | 2252.3302 | -0.999583114 | 0.000767 | 0.006322 | Il1r2         |
| 697.921 | 735.379 | 1014.6036 | 1538.95   | -0.831638616 | 0.000779 | 0.006411 | Gzfl          |
| 0       | 0.89137 | 46.908045 | 13.413986 | -5.989936237 | 0.000782 | 0.006433 | Mcpt1         |
| 531.749 | 693.485 | 963.35225 | 1069.4605 | -0.728843127 | 0.000791 | 0.006483 | Bcl2l2        |
| 1856.97 | 1913.77 | 2548.6704 | 2888.8848 | -0.527548593 | 0.000799 | 0.006541 | Uhrf2         |
| 213.946 | 125.683 | 476.89845 | 317.05785 | -1.229591527 | 0.000802 | 0.006552 | Irak3         |
| 121.513 | 153.315 | 266.68092 | 278.03535 | -0.984414587 | 0.000802 | 0.006552 | Sccpdh        |
| 502.669 | 512.537 | 740.10471 | 904.83433 | -0.694647796 | 0.000807 | 0.006591 | Gm15772       |
| 1218.25 | 1800.56 | 2412.2896 | 2729.1364 | -0.767413651 | 0.000821 | 0.006692 | Crim1         |
| 4379.66 | 4630.66 | 5974.695  | 6736.2599 | -0.496133958 | 0.000822 | 0.006692 | Sars          |
| 262.759 | 237.995 | 357.89101 | 1059.7049 | -1.499632875 | 0.000831 | 0.006763 | Itih5         |
| 37.3886 | 29.4152 | 88.604084 | 113.40916 | -1.59657423  | 0.000832 | 0.006768 | Wwc2          |
| 4543.75 | 4806.26 | 6404.6854 | 6375.3018 | -0.450783811 | 0.00084  | 0.006831 | Acot7         |
| 951.332 | 836.995 | 1346.4346 | 1324.3263 | -0.579268661 | 0.000848 | 0.006881 | Tmem9b        |
| 579.523 | 693.485 | 938.16089 | 1151.1639 | -0.712982853 | 0.000849 | 0.006883 | Rara          |
| 458.01  | 763.012 | 1005.917  | 1482.8552 | -1.025533757 | 0.000858 | 0.006939 | Evalb         |

|         |         |           |           |              |          |          |               |
|---------|---------|-----------|-----------|--------------|----------|----------|---------------|
| 486.052 | 328.024 | 697.54    | 792.64463 | -0.873105297 | 0.000858 | 0.006939 | Lmo4          |
| 1680.41 | 1801.46 | 2499.1564 | 2424.2731 | -0.499753437 | 0.00086  | 0.006951 | Aff4          |
| 2221.51 | 5125.37 | 19888.142 | 12899.377 | -2.15790511  | 0.000862 | 0.006962 | Serpinb9      |
| 0       | 0.89137 | 21.716687 | 30.486332 | -5.768943094 | 0.000867 | 0.006995 | Gm16548       |
| 38.4272 | 71.3095 | 157.22882 | 149.99275 | -1.47992157  | 0.000872 | 0.007031 | Tle2          |
| 1583.82 | 1740.84 | 2267.2222 | 2765.72   | -0.597352017 | 0.000877 | 0.007066 | Gabarapl1     |
| 746.734 | 1090.14 | 1392.474  | 2081.6068 | -0.917993581 | 0.000877 | 0.007066 | Il10ra        |
| 629.375 | 613.262 | 890.38418 | 1045.0715 | -0.638195148 | 0.000887 | 0.007134 | 9530082P21Rik |
| 58.1601 | 34.7634 | 131.16879 | 129.26205 | -1.492543967 | 0.000889 | 0.007145 | 5430427O19Rik |
| 216.023 | 218.385 | 347.467   | 458.51443 | -0.889030121 | 0.000895 | 0.007174 | Tbc1d30       |
| 24.9257 | 41.003  | 114.66411 | 93.897903 | -1.65764928  | 0.000896 | 0.007179 | AW011738      |
| 2128.03 | 2368.37 | 3042.0736 | 3822.986  | -0.609826447 | 0.000897 | 0.007181 | Dtx3          |
| 1930.71 | 2017.17 | 2953.4695 | 2664.5054 | -0.509282508 | 0.000903 | 0.007227 | Eaf1          |
| 6.23143 | 8.91369 | 40.827372 | 47.558678 | -2.535647139 | 0.000909 | 0.007264 | Wwtr1         |
| 18.6943 | 28.5238 | 78.180075 | 85.36173  | -1.78509722  | 0.000918 | 0.007317 | Esr1          |
| 1981.6  | 2173.16 | 2817.9574 | 3232.7706 | -0.541714366 | 0.000918 | 0.007317 | Stard4        |
| 390.503 | 189.862 | 643.68261 | 649.9686  | -1.158512786 | 0.000919 | 0.007321 | Papss2        |
| 195.252 | 340.503 | 528.14984 | 578.02086 | -1.043277819 | 0.000921 | 0.007332 | Adgrg5        |
| 1230.71 | 1544.74 | 2116.9427 | 2115.7514 | -0.608326353 | 0.000929 | 0.007381 | Gatsl2        |
| 91.3944 | 32.0893 | 755.74072 | 291.44933 | -3.08660061  | 0.000935 | 0.007425 | Gm15915       |
| 111.127 | 186.296 | 271.89293 | 462.17279 | -1.298540913 | 0.000943 | 0.007482 | Tha1          |
| 17.6557 | 32.9806 | 63.412727 | 157.30947 | -2.11264923  | 0.000969 | 0.007656 | Gm3739        |
| 140.207 | 125.683 | 230.19689 | 321.93567 | -1.05180437  | 0.000972 | 0.007668 | Chst14        |
| 1932.78 | 1854.94 | 2540.8524 | 2986.4411 | -0.544764191 | 0.000972 | 0.007668 | Trabd         |
| 25078.4 | 24734.6 | 32213.665 | 36286.052 | -0.459532094 | 0.000988 | 0.007777 | Rps18         |
| 1169.43 | 2704.41 | 6640.963  | 9551.9775 | -2.063383603 | 0.001002 | 0.007867 | Tg            |
| 1891.24 | 2309.54 | 2938.7021 | 3519.3422 | -0.619732489 | 0.001003 | 0.007867 | Golgb1        |
| 2092.72 | 2683.91 | 3362.6119 | 4436.371  | -0.706639997 | 0.001003 | 0.007867 | Khynyn        |
| 370.77  | 427.857 | 759.21539 | 598.75156 | -0.766850412 | 0.001008 | 0.007889 | Bicap         |
| 844.359 | 903.848 | 1229.1645 | 1382.86   | -0.578241528 | 0.00101  | 0.007902 | Tmem106b      |
| 212.907 | 232.647 | 468.21178 | 353.64145 | -0.885210569 | 0.001011 | 0.007906 | Mocos         |
| 0       | 2.67411 | 25.191357 | 30.486332 | -4.313937367 | 0.001013 | 0.00791  | Klra17        |
| 1707.41 | 2089.37 | 2823.1694 | 2807.1815 | -0.568075905 | 0.001013 | 0.00791  | Fdft1         |
| 569.138 | 763.903 | 1053.6937 | 1146.2861 | -0.721354069 | 0.001019 | 0.007943 | Yap1          |
| 241.987 | 324.458 | 482.97913 | 531.68163 | -0.838502765 | 0.00102  | 0.007947 | Eno3          |
| 537.981 | 485.796 | 797.43676 | 782.88901 | -0.627086813 | 0.001023 | 0.007959 | Psen2         |
| 1489.31 | 1657.05 | 2141.2654 | 2746.2088 | -0.634483873 | 0.001024 | 0.007967 | Pik3r1        |
| 5.19286 | 4.45684 | 36.484035 | 34.144692 | -2.876241665 | 0.001024 | 0.007967 | B4galt6       |
| 1581.75 | 1675.77 | 2267.2222 | 2312.0834 | -0.49108005  | 0.001025 | 0.007968 | Dctn4         |
| 2854    | 838.778 | 19603.219 | 10017.809 | -3.003938226 | 0.001027 | 0.007972 | Csf2rb2       |
| 1142.43 | 1435.1  | 1795.5357 | 3037.6581 | -0.905993335 | 0.001033 | 0.008008 | Pde4d         |
| 2774.03 | 5062.08 | 7613.8706 | 6999.6618 | -0.898917165 | 0.001033 | 0.008008 | Itga3         |
| 8775.94 | 8844.16 | 11455.118 | 12710.362 | -0.455603412 | 0.00104  | 0.008062 | Rpl35a        |
| 3.11572 | 3.56547 | 33.878032 | 28.047425 | -3.211028574 | 0.001051 | 0.008142 | Mertk         |
| 1651.33 | 1736.39 | 2434.0063 | 2324.278  | -0.490212445 | 0.001052 | 0.008145 | Sgpl1         |

|         |         |           |           |              |          |          |          |
|---------|---------|-----------|-----------|--------------|----------|----------|----------|
| 37.3886 | 32.0893 | 111.18944 | 89.020089 | -1.531827395 | 0.001061 | 0.008206 | Apold1   |
| 1156.97 | 1225.63 | 1622.6709 | 2049.901  | -0.623181504 | 0.001078 | 0.008314 | Mta3     |
| 1612.9  | 1651.71 | 2201.2034 | 2460.8567 | -0.513479862 | 0.001086 | 0.008357 | Tor4a    |
| 15.5786 | 41.8943 | 162.44082 | 80.483917 | -2.075282055 | 0.00109  | 0.008381 | Ifi214   |
| 10.3857 | 24.067  | 52.12005  | 118.28697 | -2.291538895 | 0.001102 | 0.008453 | Spaca6   |
| 460.088 | 643.568 | 980.7256  | 898.73707 | -0.767289545 | 0.001106 | 0.008479 | Nsdhl    |
| 2179.96 | 2407.59 | 3100.2743 | 3463.2473 | -0.516201708 | 0.001125 | 0.008596 | Uqcrh    |
| 54.0058 | 32.9806 | 92.078754 | 208.52651 | -1.788117695 | 0.001127 | 0.00861  | Rapgef3  |
| 15.5786 | 48.1339 | 91.210087 | 181.69854 | -2.087373816 | 0.001135 | 0.008656 | Nid1     |
| 832.935 | 1349.53 | 1916.2805 | 1952.3447 | -0.825080246 | 0.001135 | 0.008656 | B4galnt4 |
| 1318.99 | 1495.72 | 1997.0666 | 2065.7539 | -0.528962387 | 0.001152 | 0.008762 | Zfas1    |
| 437.239 | 689.919 | 1851.1304 | 823.13096 | -1.246892195 | 0.001153 | 0.008766 | Nkain1   |
| 1442.58 | 1642.79 | 2116.9427 | 2493.782  | -0.578666406 | 0.001156 | 0.008779 | Use1     |
| 16.6172 | 8.91369 | 56.463387 | 58.533757 | -2.181189044 | 0.00116  | 0.008802 | Prune2   |
| 131.899 | 199.667 | 278.84227 | 524.36491 | -1.272065095 | 0.001162 | 0.008814 | Tbxa2r   |
| 7.27001 | 0.89137 | 31.27203  | 51.217038 | -3.367346277 | 0.001167 | 0.008852 | Plbd1    |
| 431.008 | 771.034 | 1150.9844 | 1167.0168 | -0.946145466 | 0.001171 | 0.008875 | Maged2   |
| 880.709 | 1122.23 | 1502.7948 | 1612.1172 | -0.636076013 | 0.001199 | 0.00905  | Slc25a24 |
| 1462.31 | 1609.81 | 2073.5093 | 2748.6477 | -0.649507631 | 0.0012   | 0.009058 | Gyg      |
| 2406.37 | 3553.89 | 7260.3229 | 4224.1862 | -0.946359985 | 0.001208 | 0.009111 | Trim30a  |
| 6876.39 | 7989.34 | 10545.623 | 10264.138 | -0.485202351 | 0.001213 | 0.009144 | Edem1    |
| 1.03857 | 3.56547 | 17.37335  | 47.558678 | -3.781139029 | 0.001221 | 0.009189 | Dleu7    |
| 299.109 | 582.955 | 924.26221 | 892.6398  | -1.041086761 | 0.001222 | 0.009189 | Fah      |
| 3145.84 | 2706.2  | 3973.2851 | 4574.1693 | -0.546451413 | 0.001233 | 0.009272 | Galnt6   |
| 355.192 | 456.381 | 632.38994 | 752.40267 | -0.768513236 | 0.001235 | 0.009279 | Mpp5     |
| 885.902 | 1130.26 | 1690.4269 | 1481.6357 | -0.653706991 | 0.001239 | 0.00931  | Irak2    |
| 126.706 | 98.0506 | 191.10685 | 373.1527  | -1.325746536 | 0.001246 | 0.009353 | Sh3pxd2a |
| 6317.64 | 6538.19 | 8354.844  | 11099.464 | -0.59742732  | 0.001253 | 0.009406 | Gimap6   |
| 494.36  | 608.805 | 809.59811 | 1056.0465 | -0.755904369 | 0.001266 | 0.00948  | Dnajb2   |
| 885.902 | 1017.94 | 1312.5566 | 1982.831  | -0.790176001 | 0.001268 | 0.009485 | Taz      |
| 2243.32 | 2888.93 | 3910.7411 | 3805.9137 | -0.588118279 | 0.001272 | 0.009514 | Adora2a  |
| 27.0029 | 98.9419 | 203.26819 | 245.11011 | -1.825221028 | 0.001278 | 0.009545 | Myrf     |
| 712.461 | 588.303 | 1362.0706 | 924.34559 | -0.815614229 | 0.001288 | 0.009595 | Fam129b  |
| 167.21  | 220.168 | 342.25499 | 376.81106 | -0.889450139 | 0.001288 | 0.009595 | Sv2a     |
| 522.402 | 416.269 | 720.12535 | 820.69206 | -0.715149971 | 0.0013   | 0.009673 | Pgm1     |
| 20.7714 | 11.5878 | 66.01873  | 63.411571 | -2.009371086 | 0.0013   | 0.009673 | Aldh3b1  |
| 135.014 | 189.862 | 297.08428 | 343.88583 | -0.976618063 | 0.001309 | 0.009732 | Gm15283  |
| 1033.38 | 974.266 | 1418.534  | 1462.1245 | -0.520926079 | 0.00131  | 0.009734 | Fli1     |
| 9.34715 | 17.8274 | 46.908045 | 81.70337  | -2.228087056 | 0.001311 | 0.009738 | Gm26756  |
| 743.618 | 689.919 | 1011.9976 | 1151.1639 | -0.592966942 | 0.001324 | 0.009827 | Lrrfip2  |
| 846.437 | 1015.27 | 1285.6279 | 2121.8487 | -0.870750642 | 0.00133  | 0.009862 | Agpat4   |
| 232.64  | 210.363 | 358.75968 | 413.39466 | -0.800760288 | 0.001331 | 0.009864 | Adam19   |
| 1223.44 | 452.815 | 6233.5579 | 3392.519  | -2.521956528 | 0.001357 | 0.010011 | Itga2b   |
| 507.862 | 992.985 | 1383.7873 | 1637.7258 | -1.00824314  | 0.001357 | 0.010011 | Tnfrsf25 |
| 1067.65 | 1045.58 | 1428.0894 | 1915.7611 | -0.661027348 | 0.001372 | 0.010102 | Mroh1    |

|         |         |           |           |              |          |          |               |
|---------|---------|-----------|-----------|--------------|----------|----------|---------------|
| 9.34715 | 48.1339 | 198.05619 | 95.117356 | -2.343953344 | 0.001376 | 0.010123 | Syt17         |
| 501.63  | 517.885 | 726.20603 | 912.15105 | -0.682588368 | 0.00138  | 0.010149 | Afdn          |
| 14.54   | 24.9583 | 67.756065 | 78.04501  | -1.874763569 | 0.001384 | 0.010175 | Gm42141       |
| 6.23143 | 0       | 82.523412 | 18.291799 | -4.059475829 | 0.001389 | 0.010202 | Igha          |
| 6119.27 | 7688.95 | 9289.5302 | 13662.755 | -0.732875758 | 0.001397 | 0.010252 | Fam102a       |
| 15141.3 | 15086.4 | 19747.418 | 20241.705 | -0.403714845 | 0.0014   | 0.010267 | Rpl27         |
| 17041.9 | 16548.3 | 21541.217 | 24898.797 | -0.467260958 | 0.001426 | 0.010434 | Rpl19         |
| 536.942 | 601.674 | 921.65621 | 828.00878 | -0.620085772 | 0.001428 | 0.010438 | Evi5l         |
| 529.672 | 479.556 | 739.23604 | 825.56987 | -0.632316389 | 0.001429 | 0.010446 | Dip2a         |
| 259.643 | 143.51  | 427.38441 | 420.71138 | -1.075709885 | 0.001432 | 0.010461 | Tnfrsf21      |
| 382.195 | 480.448 | 673.21731 | 738.98869 | -0.709247416 | 0.00145  | 0.010579 | Hbp1          |
| 660.532 | 660.504 | 1180.5191 | 914.58996 | -0.666822713 | 0.001462 | 0.010664 | Tmem104       |
| 0       | 3.56547 | 26.928692 | 31.705785 | -3.98183048  | 0.001471 | 0.010722 | 2310002F09Rik |
| 17302.6 | 17116.1 | 22017.246 | 26464.575 | -0.49417273  | 0.001477 | 0.010751 | Rps20         |
| 106.973 | 113.204 | 218.90421 | 210.96542 | -0.965160448 | 0.001477 | 0.010751 | Cgrrf1        |
| 19.7329 | 1.78274 | 254.51958 | 165.84565 | -4.297508243 | 0.001482 | 0.010784 | Clec4d        |
| 898.365 | 1297.83 | 1646.9936 | 2118.1903 | -0.776514531 | 0.001493 | 0.010855 | Arhgap4       |
| 18.6943 | 10.6964 | 47.776712 | 81.70337  | -2.142122613 | 0.001494 | 0.01086  | Sptbn5        |
| 70.6229 | 119.443 | 168.52149 | 380.46942 | -1.524449383 | 0.0015   | 0.010891 | Prss16        |
| 10495.8 | 14375.1 | 17776.412 | 21103.858 | -0.644455371 | 0.0015   | 0.010891 | Samhd1        |
| 1315.87 | 1393.21 | 1828.5451 | 2063.315  | -0.521878158 | 0.001513 | 0.010975 | Rcan3         |
| 1685.6  | 2051.04 | 2701.5559 | 2754.745  | -0.545728162 | 0.001514 | 0.010977 | Vwa5a         |
| 1162.16 | 1334.38 | 1810.3031 | 1792.5963 | -0.528844681 | 0.001536 | 0.011126 | Lpcat3        |
| 3077.29 | 3072.55 | 4680.3805 | 3999.8068 | -0.497566501 | 0.001543 | 0.011171 | Bcl2l1        |
| 501.63  | 598.108 | 793.09342 | 1024.3408 | -0.722639714 | 0.001547 | 0.011171 | Fuz           |
| 9.34715 | 7.13095 | 40.827372 | 45.119771 | -2.387048471 | 0.001547 | 0.011171 | Bcl6b         |
| 26234.3 | 26152.8 | 33488.869 | 44099.089 | -0.566563973 | 0.001555 | 0.011216 | Rps6          |
| 14622.1 | 14066.7 | 18380.136 | 21437.989 | -0.472862607 | 0.001556 | 0.011216 | Rpl23         |
| 2380.41 | 2131.26 | 3407.7826 | 3023.0247 | -0.511919258 | 0.001566 | 0.011278 | Rhbdf2        |
| 2120.76 | 2572.49 | 3466.852  | 3332.7658 | -0.534656538 | 0.001569 | 0.011299 | Abcc1         |
| 116.32  | 119.443 | 208.4802  | 256.08519 | -0.975744302 | 0.001572 | 0.011311 | Gm3636        |
| 1027.15 | 1229.2  | 1682.6089 | 1647.4814 | -0.561128429 | 0.001582 | 0.01136  | Chmp1b        |
| 2055.33 | 2081.35 | 2868.3401 | 2786.4507 | -0.451100262 | 0.001587 | 0.011393 | Ssr4          |
| 1167.36 | 1290.7  | 1658.2862 | 2126.7265 | -0.621653945 | 0.001594 | 0.011429 | Rps27rt       |
| 1736.49 | 1904.85 | 2489.601  | 2603.5328 | -0.483645292 | 0.001598 | 0.011448 | Laptm4a       |
| 10.3857 | 7.13095 | 46.039377 | 42.680865 | -2.348829715 | 0.001598 | 0.011448 | C130050O18Rik |
| 23232.9 | 23974.3 | 30296.516 | 32875.241 | -0.420228764 | 0.001601 | 0.01146  | Rps26         |
| 687.535 | 830.756 | 1071.9357 | 1402.3713 | -0.702871979 | 0.001607 | 0.011494 | Plekhn1       |
| 897.327 | 831.647 | 1316.8999 | 1206.0393 | -0.546127904 | 0.001613 | 0.011531 | Mknk1         |
| 1155.93 | 1194.43 | 1570.5508 | 2186.4797 | -0.675633184 | 0.001614 | 0.011531 | Fam160b1      |
| 12704.9 | 16085.6 | 19459.889 | 24992.695 | -0.626554731 | 0.001628 | 0.011604 | Hif1a         |
| 33.2343 | 74.875  | 165.04682 | 148.7733  | -1.531912394 | 0.001628 | 0.011604 | Plcb4         |
| 1237.98 | 1602.68 | 1959.7139 | 2984.0022 | -0.798372068 | 0.001649 | 0.011731 | Zmym3         |
| 5301.91 | 6642.48 | 8253.2099 | 9350.7678 | -0.559318734 | 0.001651 | 0.011737 | Akap13        |
| 3.11572 | 2.67411 | 13.030012 | 58.533757 | -3.621825129 | 0.001655 | 0.011757 | AC153536.3    |

|         |         |           |           |              |          |          |               |
|---------|---------|-----------|-----------|--------------|----------|----------|---------------|
| 867.208 | 799.558 | 1137.9544 | 1513.3415 | -0.668626827 | 0.001668 | 0.011818 | Tmed3         |
| 175.519 | 36.5461 | 907.75753 | 953.61247 | -3.135136718 | 0.001673 | 0.011848 | Gm16194       |
| 411.275 | 385.963 | 584.61322 | 686.5522  | -0.671968268 | 0.00168  | 0.011862 | Sema6b        |
| 1462.31 | 1534.05 | 2465.2784 | 1985.2699 | -0.571443431 | 0.001681 | 0.011862 | Nampt         |
| 77.8929 | 24.067  | 741.84204 | 243.89066 | -3.275772621 | 0.001687 | 0.011903 | Serpinb2      |
| 2.07714 | 1.78274 | 50.382715 | 10.97508  | -4.004326958 | 0.001689 | 0.011912 | Ifi207        |
| 7.27001 | 5.34821 | 25.191357 | 60.972664 | -2.769507574 | 0.00169  | 0.011912 | Aqp3          |
| 13.5014 | 32.0893 | 74.705405 | 98.775716 | -1.915800025 | 0.001694 | 0.011938 | 2210408F21Rik |
| 8498.64 | 9425.33 | 11620.165 | 14205.411 | -0.526720214 | 0.001703 | 0.011991 | Ptms          |
| 1382.34 | 791.535 | 1928.4418 | 2013.3174 | -0.859227125 | 0.001708 | 0.012024 | Pecam1        |
| 327.15  | 386.854 | 536.83651 | 657.28532 | -0.739401405 | 0.00172  | 0.01209  | Abhd18        |
| 515.132 | 546.409 | 754.87205 | 887.76199 | -0.628241101 | 0.001735 | 0.012189 | Lgals8        |
| 17.6557 | 16.0446 | 66.887397 | 56.094851 | -1.871558047 | 0.001753 | 0.012296 | Tceal8        |
| 1339.76 | 1219.39 | 1736.4663 | 1959.6614 | -0.530027086 | 0.001767 | 0.012369 | Gm13841       |
| 238.872 | 314.653 | 422.1724  | 668.2604  | -0.974791957 | 0.001773 | 0.012403 | Slc39a4       |
| 407.12  | 431.422 | 701.01467 | 612.16555 | -0.648041823 | 0.001779 | 0.012427 | Hcfc1r1       |
| 55.0443 | 32.0893 | 124.21945 | 114.62861 | -1.461429109 | 0.001782 | 0.012441 | Nav1          |
| 56.0829 | 10.6964 | 193.71285 | 114.62861 | -2.217486374 | 0.001784 | 0.012452 | Arl11         |
| 451.779 | 410.03  | 636.73327 | 706.06345 | -0.639401811 | 0.001807 | 0.012578 | Tmem219       |
| 444.509 | 508.08  | 734.02403 | 730.45252 | -0.619732477 | 0.001809 | 0.012578 | Impact        |
| 9104.13 | 10353.2 | 12861.491 | 14032.249 | -0.466812376 | 0.001816 | 0.012622 | Macf1         |
| 150.593 | 103.399 | 287.52894 | 235.35448 | -1.046336565 | 0.001821 | 0.012644 | Fndc3b        |
| 44.6586 | 65.0699 | 117.27011 | 167.0651  | -1.366385643 | 0.001824 | 0.012653 | Trp53cor1     |
| 12866.9 | 12889.2 | 16416.078 | 18486.912 | -0.438347217 | 0.001827 | 0.012668 | Eef1b2        |
| 789.315 | 875.324 | 1180.5191 | 1246.2813 | -0.543009043 | 0.001848 | 0.012792 | Ormdl3        |
| 1016.76 | 1085.69 | 1423.746  | 1648.7008 | -0.546275686 | 0.00188  | 0.012989 | Kdelr1        |
| 870.324 | 1089.25 | 1414.1907 | 1584.0698 | -0.612423761 | 0.001884 | 0.013013 | AW549877      |
| 79.9701 | 83.7887 | 149.41081 | 215.84323 | -1.152901061 | 0.001926 | 0.01327  | Jup           |
| 136.053 | 180.948 | 280.5796  | 320.71621 | -0.920048324 | 0.001937 | 0.013342 | Map4k5        |
| 1609.79 | 1294.27 | 2492.207  | 2004.7812 | -0.631899066 | 0.001951 | 0.013422 | Igflr         |
| 949.255 | 919.892 | 1263.9112 | 1490.1719 | -0.558328994 | 0.001958 | 0.013442 | Rpl28-ps1     |
| 191.097 | 238.887 | 294.47828 | 859.71456 | -1.421844679 | 0.001967 | 0.013502 | Jakmip1       |
| 210.83  | 367.244 | 591.56256 | 540.2178  | -0.967629209 | 0.001978 | 0.013559 | Pde8a         |
| 596.141 | 685.463 | 909.49487 | 1059.7049 | -0.618029904 | 0.001978 | 0.013559 | Mfsd13a       |
| 99.703  | 91.811  | 220.64154 | 173.16237 | -1.043779189 | 0.001985 | 0.013593 | Fam84b        |
| 8260.81 | 8366.39 | 10629.015 | 11753.091 | -0.428669533 | 0.001989 | 0.013597 | Rpl30         |
| 1.03857 | 0       | 16.504682 | 28.047425 | -5.516080078 | 0.001996 | 0.013635 | Csf3r         |
| 334.42  | 591.869 | 790.48742 | 1014.5851 | -0.960408103 | 0.002006 | 0.013689 | Gm17767       |
| 39.4658 | 58.8303 | 97.290759 | 198.77088 | -1.582572997 | 0.002006 | 0.013689 | Gm3468        |
| 60.2372 | 141.728 | 246.70157 | 275.59644 | -1.365816588 | 0.002015 | 0.013741 | Ccdc102a      |
| 1443.62 | 1470.76 | 1909.3312 | 2776.6951 | -0.6843009   | 0.002041 | 0.013908 | Runx2         |
| 2298.36 | 2188.31 | 2911.7734 | 3996.1484 | -0.62207561  | 0.002049 | 0.013955 | Tbc1d9b       |
| 7345.82 | 7365.38 | 9367.7103 | 13311.552 | -0.624260723 | 0.002055 | 0.013978 | Nop53         |
| 4214.53 | 4687.71 | 5852.2129 | 6431.3966 | -0.464200486 | 0.002055 | 0.013978 | Etnk1         |
| 1862.16 | 1860.29 | 2423.5823 | 3141.3117 | -0.579411202 | 0.002064 | 0.014014 | Rpl3-ps1      |



|         |         |           |           |              |          |          |               |
|---------|---------|-----------|-----------|--------------|----------|----------|---------------|
| 259.643 | 434.988 | 682.77265 | 624.36008 | -0.910696963 | 0.002075 | 0.014085 | Wdfy1         |
| 42.5815 | 11.5878 | 178.9455  | 71.947744 | -2.223702937 | 0.00208  | 0.014104 | Maob          |
| 411.275 | 409.138 | 595.9059  | 678.01602 | -0.633609944 | 0.002118 | 0.014332 | Gm10132       |
| 233.679 | 271.867 | 363.10301 | 731.67197 | -1.111703765 | 0.002121 | 0.014342 | Ifng          |
| 27.0029 | 11.5878 | 58.200722 | 98.775716 | -2.029570394 | 0.002139 | 0.014454 | Rbm47         |
| 714.538 | 853.931 | 1185.7311 | 1152.3834 | -0.575468105 | 0.002139 | 0.014454 | Baz2b         |
| 19755.7 | 19504.9 | 24812.618 | 29598.57  | -0.470749896 | 0.00214  | 0.014455 | Rps7          |
| 24.9257 | 17.8274 | 72.099402 | 68.289384 | -1.721026234 | 0.002153 | 0.014532 | Dpep2         |
| 189.02  | 177.382 | 275.3676  | 499.97585 | -1.0784473   | 0.002169 | 0.014622 | Parp16        |
| 106.973 | 149.75  | 234.54022 | 280.47425 | -1.000030735 | 0.002191 | 0.014759 | Ahnak2        |
| 4400.43 | 4543.31 | 6290.0213 | 5766.7946 | -0.43105134  | 0.002194 | 0.014776 | Rab8b         |
| 824.627 | 885.129 | 1183.9938 | 1281.6454 | -0.527290136 | 0.002203 | 0.014812 | Mdp1          |
| 300.147 | 262.062 | 497.74647 | 431.68646 | -0.727620701 | 0.002205 | 0.014812 | Ffar2         |
| 208.753 | 244.235 | 381.34503 | 382.90833 | -0.753302884 | 0.002211 | 0.014845 | Scamp1        |
| 1273.29 | 1319.23 | 1760.789  | 1837.7161 | -0.472655297 | 0.002212 | 0.014849 | Sos2          |
| 1212.01 | 1340.62 | 1711.275  | 2008.4396 | -0.542206035 | 0.002231 | 0.014962 | Tmem59        |
| 155.786 | 191.644 | 293.60961 | 335.34965 | -0.853136814 | 0.002235 | 0.014981 | Zfp760        |
| 1626.4  | 1784.52 | 2257.6668 | 2631.5802 | -0.518667115 | 0.002245 | 0.015038 | Ezh1          |
| 78.9315 | 23.1756 | 252.78224 | 125.60369 | -1.898228841 | 0.002249 | 0.01505  | Met           |
| 60.2372 | 70.4181 | 119.87611 | 210.96542 | -1.334215882 | 0.002253 | 0.015065 | Hsd11b1       |
| 5138.86 | 5810.83 | 7320.261  | 7604.5107 | -0.446640622 | 0.002262 | 0.015107 | Sik3          |
| 344.806 | 406.464 | 545.52319 | 736.54978 | -0.768359579 | 0.002272 | 0.015156 | Cyp4f13       |
| 397.773 | 136.379 | 789.61875 | 586.55703 | -1.367906179 | 0.00228  | 0.015198 | Dok3          |
| 627.298 | 579.39  | 852.16281 | 946.29575 | -0.57523896  | 0.002282 | 0.015211 | Tmem263       |
| 1259.79 | 1596.44 | 2029.2073 | 2255.9886 | -0.584398926 | 0.002287 | 0.015234 | Tnfsf10       |
| 258.605 | 117.661 | 589.82523 | 343.88583 | -1.315182053 | 0.002291 | 0.015254 | C3            |
| 560.829 | 476.882 | 804.3861  | 778.01119 | -0.609838502 | 0.002292 | 0.015254 | Atp8a1        |
| 750.888 | 632.872 | 1026.765  | 1038.9742 | -0.578728514 | 0.0023   | 0.015297 | Klhl5         |
| 2.07714 | 0       | 29.534695 | 17.072346 | -4.563852408 | 0.002302 | 0.015303 | Fcgr4         |
| 2283.82 | 2789.09 | 4262.5514 | 3401.0552 | -0.595388356 | 0.002307 | 0.015324 | Trim25        |
| 4.15429 | 3.56547 | 29.534695 | 29.266879 | -2.933149437 | 0.002308 | 0.015324 | Mmp9          |
| 3.11572 | 5.34821 | 34.7467   | 28.047425 | -2.881387181 | 0.002309 | 0.015324 | Cfap45        |
| 0       | 0       | 9.5553424 | 18.291799 | -6.292499366 | 0.002317 | 0.015365 | 1700071M16Rik |
| 1892.28 | 1838    | 2440.087  | 2766.9395 | -0.480731809 | 0.002318 | 0.015365 | Cmas          |
| 82.0472 | 91.811  | 221.51021 | 154.87057 | -1.117097911 | 0.002324 | 0.0154   | C77080        |
| 472.55  | 575.824 | 773.11407 | 867.03128 | -0.643920131 | 0.002329 | 0.01542  | Eif2ak4       |
| 4640.34 | 5102.19 | 6279.5973 | 7494.7599 | -0.499284999 | 0.00234  | 0.015486 | Eif4a2        |
| 14767.5 | 21191.4 | 26741.06  | 28662.03  | -0.623551474 | 0.002346 | 0.015512 | Npc2          |
| 5486.78 | 5777.85 | 8666.6956 | 7177.702  | -0.492373042 | 0.00236  | 0.015596 | Os9           |
| 598.218 | 728.248 | 919.91888 | 1319.4484 | -0.753596613 | 0.00236  | 0.015596 | Cog6          |
| 482.936 | 402.007 | 638.47061 | 820.69206 | -0.720656855 | 0.002367 | 0.015636 | Slc35f6       |
| 1728.18 | 1996.67 | 2510.4491 | 2813.2787 | -0.514563108 | 0.002374 | 0.015665 | Uhrflbp11     |
| 1187.09 | 1031.31 | 1499.3201 | 1843.8134 | -0.591183325 | 0.002375 | 0.015665 | Rpl9-ps6      |
| 584.716 | 317.327 | 1172.7011 | 721.91634 | -1.072863609 | 0.002378 | 0.015677 | Wdfy4         |
| 120.474 | 168.469 | 408.27372 | 232.91558 | -1.151438156 | 0.002386 | 0.015728 | Pde5a         |

|         |         |           |           |              |          |          |               |
|---------|---------|-----------|-----------|--------------|----------|----------|---------------|
| 2.07714 | 2.67411 | 25.191357 | 24.389066 | -3.376616145 | 0.002428 | 0.015948 | Gm32051       |
| 0       | 4.45684 | 23.454022 | 39.022505 | -3.756857064 | 0.002436 | 0.015996 | Gm20544       |
| 4.15429 | 4.45684 | 36.484035 | 25.608519 | -2.852778128 | 0.002444 | 0.016045 | Fblim1        |
| 1148.66 | 1428.86 | 1868.5038 | 1925.5167 | -0.557069172 | 0.002447 | 0.016048 | Vps39         |
| 588.871 | 618.61  | 1033.7143 | 828.00878 | -0.625907189 | 0.002472 | 0.016182 | Ninj1         |
| 2967.2  | 3265.08 | 4019.3245 | 5210.7239 | -0.566058268 | 0.002474 | 0.016188 | Gm6472        |
| 999.107 | 1211.37 | 1512.3501 | 1895.0304 | -0.623030774 | 0.002477 | 0.016197 | Lpin1         |
| 39.4658 | 58.8303 | 100.76543 | 170.72346 | -1.457503569 | 0.002478 | 0.0162   | Trim36        |
| 549.405 | 660.504 | 859.98082 | 1038.9742 | -0.648432903 | 0.00248  | 0.016205 | Btg3          |
| 508.9   | 1543.85 | 6581.8936 | 4222.9667 | -2.395912605 | 0.002481 | 0.016205 | Baspl         |
| 1485.16 | 1594.66 | 2078.7213 | 2174.2852 | -0.465187423 | 0.00249  | 0.016261 | 2810403A07Rik |
| 1654.45 | 1440.45 | 2298.4942 | 2101.118  | -0.508213693 | 0.002515 | 0.016388 | Atp13a2       |
| 65.4301 | 33.872  | 170.25883 | 110.97025 | -1.510577103 | 0.002524 | 0.016436 | Slc22a23      |
| 1759.34 | 2108.98 | 2651.1732 | 2913.2739 | -0.523892356 | 0.002533 | 0.016477 | Krit1         |
| 1.03857 | 0       | 51.251382 | 4.8778131 | -5.856697256 | 0.002543 | 0.016535 | Ptx3          |
| 1302.37 | 1290.7  | 1734.729  | 1858.4468 | -0.470210845 | 0.00257  | 0.016696 | Ap3m1         |
| 21822.5 | 21179.8 | 27032.932 | 32670.373 | -0.473335944 | 0.002572 | 0.016697 | Rpl32         |
| 11.4243 | 8.91369 | 57.332055 | 36.583598 | -2.216843118 | 0.00259  | 0.016801 | Fam198b       |
| 1082.19 | 999.224 | 1422.8774 | 1521.8777 | -0.500446717 | 0.002594 | 0.016813 | Qsox1         |
| 580.562 | 705.073 | 939.02956 | 1013.3657 | -0.601420342 | 0.002616 | 0.016929 | Tmem167b      |
| 2980.7  | 2817.62 | 4098.3732 | 3769.3301 | -0.44066947  | 0.002619 | 0.016937 | Serf2         |
| 5050.58 | 5408.83 | 6649.6497 | 8632.5098 | -0.54673332  | 0.002634 | 0.017015 | Ptpn22        |
| 2227.74 | 2576.06 | 4997.4441 | 3088.8752 | -0.751695143 | 0.002661 | 0.01716  | Bst2          |
| 17.6557 | 39.2202 | 88.604084 | 97.556262 | -1.70125674  | 0.002668 | 0.017198 | Slc7a3        |
| 205.637 | 274.542 | 411.74839 | 419.49193 | -0.789655315 | 0.002675 | 0.017238 | Snx32         |
| 180.712 | 142.619 | 293.60961 | 289.01043 | -0.851673092 | 0.002682 | 0.017273 | 2810025M15Rik |
| 0       | 1.78274 | 20.84802  | 21.950159 | -4.514814015 | 0.002692 | 0.017314 | Spaca9        |
| 3441.83 | 3108.2  | 4283.3994 | 4719.2842 | -0.458756961 | 0.002694 | 0.017316 | Nsf           |
| 573.292 | 420.726 | 807.86077 | 797.52245 | -0.692917887 | 0.002714 | 0.017425 | Rreb1         |
| 75.8158 | 21.3928 | 291.87228 | 103.65353 | -2.032837752 | 0.002732 | 0.017525 | Npl           |
| 1342.87 | 1578.61 | 1924.9672 | 2766.9395 | -0.682456815 | 0.002739 | 0.017559 | Zfp36         |
| 42.5815 | 83.7887 | 120.74478 | 259.74355 | -1.582502131 | 0.002752 | 0.017626 | Ypel4         |
| 201.483 | 301.283 | 562.89654 | 401.20013 | -0.939444121 | 0.002762 | 0.017676 | Tdrd7         |
| 11.4243 | 7.13095 | 50.382715 | 37.803052 | -2.26066912  | 0.002795 | 0.017873 | Lefty1        |
| 18.6943 | 57.0476 | 729.6807  | 162.18729 | -3.556157849 | 0.002809 | 0.017935 | Mrvi1         |
| 4.15429 | 0       | 15.636015 | 49.997585 | -4.024526198 | 0.002813 | 0.017952 | Dao           |
| 1702.22 | 1851.37 | 2321.0795 | 2749.8671 | -0.512199659 | 0.002818 | 0.017975 | Ccn1          |
| 0       | 0       | 3.47467   | 29.266879 | -6.522067236 | 0.00282  | 0.017981 | Olfr221       |
| 652.223 | 648.916 | 923.39355 | 947.5152  | -0.523751984 | 0.002822 | 0.017991 | Rabepk        |
| 14.54   | 6.23958 | 62.54406  | 39.022505 | -2.306570591 | 0.002825 | 0.018003 | Dach1         |
| 577.446 | 918.11  | 1275.2039 | 1270.6703 | -0.766477975 | 0.002832 | 0.018023 | Spg11         |
| 1972.25 | 2106.3  | 2632.0625 | 3301.06   | -0.540011471 | 0.002836 | 0.018034 | Pfdn5         |
| 50.89   | 90.0282 | 148.54214 | 197.55143 | -1.289429885 | 0.002839 | 0.018045 | Rbpsuh-rs3    |
| 3.11572 | 1.78274 | 26.060025 | 23.169612 | -3.345857593 | 0.00284  | 0.01805  | AC121583.1    |
| 1362.61 | 1333.49 | 1915.4118 | 1796.2547 | -0.461651552 | 0.002878 | 0.01824  | Ctsc          |

|         |         |           |           |              |          |          |               |
|---------|---------|-----------|-----------|--------------|----------|----------|---------------|
| 74.7772 | 116.769 | 200.66219 | 207.30706 | -1.086788278 | 0.002879 | 0.01824  | Cela1         |
| 1192.28 | 1214.04 | 1574.0255 | 1969.417  | -0.557317778 | 0.002884 | 0.018262 | Zdhhc20       |
| 21.81   | 49.9166 | 125.95679 | 97.556262 | -1.634386154 | 0.0029   | 0.018358 | Fzd6          |
| 937.831 | 915.436 | 1239.5885 | 1427.9798 | -0.524640065 | 0.002904 | 0.018376 | Cops9         |
| 0       | 0       | 16.504682 | 9.7556262 | -6.217467784 | 0.002909 | 1        | 4930430E12Rik |
| 125.667 | 74.875  | 412.61706 | 157.30947 | -1.512261141 | 0.002918 | 0.018448 | Mpeg1         |
| 15.5786 | 1.78274 | 153.75415 | 18.291799 | -3.328145359 | 0.002958 | 0.018681 | Ccl2          |
| 1283.68 | 1641.9  | 1973.6125 | 2738.8921 | -0.686745421 | 0.002961 | 0.018681 | 2010016I18Rik |
| 113.204 | 88.2455 | 254.51958 | 173.16237 | -1.091654344 | 0.002961 | 0.018681 | Chn2          |
| 15.5786 | 10.6964 | 66.887397 | 41.461412 | -2.05517554  | 0.002962 | 0.018681 | Tacstd2       |
| 176.557 | 258.497 | 421.30373 | 373.1527  | -0.867544652 | 0.002964 | 0.018687 | Mrgpre        |
| 4.15429 | 31.1979 | 55.59472  | 163.40674 | -2.616308391 | 0.002965 | 0.018687 | Hormad2       |
| 569.138 | 859.279 | 1216.1345 | 1153.6028 | -0.729473401 | 0.002974 | 0.018727 | Nckap1        |
| 13.5014 | 7.13095 | 32.140697 | 74.38665  | -2.370529385 | 0.002974 | 0.018727 | Fam71f2       |
| 1725.07 | 1796.11 | 2301.1002 | 2548.6574 | -0.461288764 | 0.002983 | 0.018765 | Got1          |
| 11.4243 | 5.34821 | 36.484035 | 49.997585 | -2.375932227 | 0.002991 | 0.018805 | Tnfsf12       |
| 2.07714 | 0.89137 | 48.64538  | 7.3167197 | -4.268681117 | 0.003004 | 0.018874 | Mcpt2         |
| 7584.69 | 7261.98 | 9382.4776 | 10714.117 | -0.43668056  | 0.003005 | 0.018876 | Rps21         |
| 1738.57 | 1798.78 | 2261.1415 | 3405.933  | -0.679174935 | 0.003016 | 0.018925 | Myo18a        |
| 817.356 | 954.656 | 1394.2113 | 1220.6727 | -0.561575516 | 0.003025 | 0.018974 | Tnfrsf26      |
| 413.352 | 426.074 | 586.35056 | 759.71939 | -0.679175536 | 0.003029 | 0.018995 | Gm3362        |
| 588.871 | 1090.14 | 1339.4853 | 1888.9331 | -0.941886161 | 0.003032 | 0.018999 | Ikzf4         |
| 405.043 | 516.994 | 655.84396 | 935.32067 | -0.784685552 | 0.003039 | 0.019034 | Dusp22        |
| 0       | 0       | 12.161345 | 13.413986 | -6.17413267  | 0.003046 | 1        | Gm37199       |
| 6794.34 | 7717.47 | 10065.25  | 9550.7581 | -0.434779734 | 0.003059 | 0.019114 | Zc3hav1       |
| 122.552 | 187.187 | 270.15559 | 348.76364 | -0.994163487 | 0.003083 | 0.019233 | Efemp2        |
| 2436.49 | 3000.35 | 4262.5514 | 3655.9209 | -0.542508314 | 0.003102 | 0.019321 | Pde3b         |
| 1289.91 | 1478.78 | 1997.0666 | 1897.4693 | -0.492109821 | 0.003113 | 0.019379 | Dcaf11        |
| 51.9286 | 40.1116 | 111.18944 | 110.97025 | -1.274412659 | 0.003113 | 0.019379 | Grin2d        |
| 6786.03 | 11137.7 | 16304.02  | 13607.879 | -0.738807791 | 0.00312  | 0.019405 | Neat1         |
| 86.2015 | 118.552 | 198.92486 | 212.18487 | -1.002040156 | 0.003121 | 0.019405 | Rnf135        |
| 151.632 | 191.644 | 280.5796  | 346.32473 | -0.865063288 | 0.00315  | 0.019561 | Katnall       |
| 261.72  | 270.085 | 437.80842 | 409.7363  | -0.672957132 | 0.003152 | 0.019561 | Sertad3       |
| 76.8544 | 27.6324 | 140.72413 | 174.38182 | -1.597812091 | 0.003159 | 0.019593 | Gstm1         |
| 8274.31 | 8143.54 | 10289.366 | 12471.349 | -0.471114896 | 0.003167 | 0.019635 | Rpl36a        |
| 250.296 | 521.451 | 703.62067 | 891.42035 | -1.045182482 | 0.003168 | 0.019635 | Nebl          |
| 1299.25 | 1862.07 | 2365.3816 | 2582.802  | -0.64565727  | 0.003176 | 0.019667 | Mapkbp1       |
| 5802.5  | 6989.22 | 9063.6766 | 8682.5074 | -0.47222295  | 0.003176 | 0.019667 | Capg          |
| 846.437 | 1100.84 | 1309.0819 | 2086.4846 | -0.800824527 | 0.003177 | 0.019667 | Cicf1         |
| 823.588 | 948.416 | 1266.5172 | 1277.987  | -0.521385311 | 0.003179 | 0.019677 | Clec2d        |
| 805.932 | 743.401 | 1058.037  | 1184.0891 | -0.532751837 | 0.003214 | 0.019843 | Htatip2       |
| 213.946 | 228.19  | 361.36568 | 362.17762 | -0.710019984 | 0.003227 | 0.019908 | Gm10154       |
| 14.54   | 30.3065 | 61.675392 | 99.995169 | -1.837485818 | 0.003228 | 0.019909 | Gm42632       |
| 91.3944 | 90.9196 | 324.01298 | 140.23713 | -1.352873852 | 0.003232 | 0.019924 | Wdfy3         |
| 12.4629 | 8.02232 | 48.64538  | 41.461412 | -2.146857907 | 0.003246 | 0.019977 | Kif19a        |

|         |         |           |           |              |          |          |               |
|---------|---------|-----------|-----------|--------------|----------|----------|---------------|
| 5.19286 | 0.89137 | 39.958705 | 20.730706 | -3.356914266 | 0.003246 | 0.019977 | Clmp          |
| 3551.92 | 4632.44 | 5902.5956 | 5959.4682 | -0.535185656 | 0.003258 | 0.020033 | Gdi1          |
| 341.69  | 422.509 | 504.69581 | 1142.6277 | -1.105907535 | 0.003291 | 0.020212 | C1qtnf12      |
| 0       | 1.78274 | 21.716687 | 19.511252 | -4.463311014 | 0.003309 | 0.020305 | Adgrg6        |
| 51.9286 | 61.5044 | 101.6341  | 198.77088 | -1.398411936 | 0.003313 | 0.020323 | U2af114       |
| 348.96  | 254.04  | 484.71646 | 536.55944 | -0.761036978 | 0.00334  | 0.020461 | Mgat4b        |
| 254.45  | 308.414 | 1042.401  | 354.8609  | -1.31323882  | 0.003358 | 0.02054  | Slc24a3       |
| 51.9286 | 58.8303 | 105.97743 | 162.18729 | -1.269780697 | 0.003365 | 0.020572 | Gm38190       |
| 14.54   | 33.872  | 69.4934   | 101.21462 | -1.805959534 | 0.003367 | 0.020576 | Rsph9         |
| 87.2401 | 295.934 | 549.86652 | 484.12295 | -1.429827578 | 0.00339  | 0.020712 | Lrrc32        |
| 89.3172 | 88.2455 | 179.81417 | 168.28455 | -0.972250937 | 0.003396 | 0.020732 | Vdr           |
| 5.19286 | 12.4792 | 33.009365 | 62.192117 | -2.410449799 | 0.003397 | 0.020732 | Platr23       |
| 689.612 | 783.513 | 972.90759 | 1537.7306 | -0.767513258 | 0.003419 | 0.020847 | Vamp1         |
| 187.982 | 118.552 | 274.49893 | 332.91075 | -0.987919627 | 0.003442 | 0.020926 | Ptgr1         |
| 3172.84 | 3155.45 | 3992.3958 | 5057.0728 | -0.515583893 | 0.003476 | 0.021065 | Gm15427       |
| 2.07714 | 7.13095 | 26.060025 | 42.680865 | -2.873077553 | 0.003483 | 0.021095 | Tmem35a       |
| 16.6172 | 9.80506 | 39.090037 | 74.38665  | -2.103824181 | 0.003484 | 0.021095 | Gm45620       |
| 0       | 0       | 23.454022 | 4.8778131 | -6.331609207 | 0.003508 | 0.021213 | Elane         |
| 1666.91 | 1508.2  | 2488.7324 | 2065.7539 | -0.521377657 | 0.00351  | 0.021215 | Syne1         |
| 22113.3 | 21929.5 | 27386.48  | 32398.435 | -0.440814621 | 0.003515 | 0.021237 | Fau           |
| 322.996 | 352.091 | 564.63387 | 492.65913 | -0.648068412 | 0.003524 | 0.021286 | Tm7sf2        |
| 10.3857 | 25.8497 | 79.91741  | 59.753211 | -1.938559431 | 0.003539 | 0.021361 | Irgc1         |
| 23223.5 | 23233.5 | 28871.033 | 33828.853 | -0.432505354 | 0.003596 | 0.021671 | Rpl7          |
| 1158.01 | 817.385 | 2231.6068 | 1336.5208 | -0.854337097 | 0.003598 | 0.021679 | Cd9           |
| 5.19286 | 2.67411 | 37.352702 | 21.950159 | -2.934733256 | 0.003602 | 0.021688 | Bco1          |
| 19012.1 | 18861.4 | 23527.859 | 28230.343 | -0.450524905 | 0.003613 | 0.021734 | Rps24         |
| 2287.98 | 2643.8  | 3230.5744 | 3726.6492 | -0.495809956 | 0.003619 | 0.021761 | Elmo1         |
| 724.924 | 833.43  | 1086.703  | 1174.3335 | -0.535848629 | 0.003628 | 0.021802 | Zfp53         |
| 1554.74 | 1798.78 | 2245.5055 | 2470.6123 | -0.491211652 | 0.003639 | 0.021849 | Polk          |
| 2660.82 | 2725.81 | 3476.4073 | 3701.0407 | -0.413812432 | 0.003646 | 0.021874 | Tecr          |
| 175.519 | 227.299 | 383.95103 | 324.37457 | -0.814165235 | 0.003647 | 0.021874 | I118bp        |
| 372.847 | 455.489 | 634.99594 | 648.74915 | -0.630767463 | 0.003647 | 0.021874 | Parp6         |
| 1837.23 | 4076.23 | 8574.6168 | 9288.5756 | -1.59481422  | 0.003664 | 0.021948 | Dgat1         |
| 4058.74 | 4599.46 | 5525.5939 | 6848.4496 | -0.514785696 | 0.003665 | 0.02195  | Nktr          |
| 203.56  | 65.9613 | 433.46508 | 302.42441 | -1.453420083 | 0.003679 | 0.022011 | Atp1a3        |
| 589.909 | 385.963 | 670.61131 | 1354.8126 | -1.052827828 | 0.003689 | 0.022052 | Fam189b       |
| 48.8129 | 16.936  | 131.16879 | 91.458996 | -1.770355076 | 0.003706 | 0.022136 | Pld1          |
| 249.257 | 238.887 | 370.05235 | 421.93084 | -0.696941234 | 0.003737 | 0.022305 | Gm11518       |
| 340.652 | 63.2872 | 2351.4829 | 1390.1767 | -3.212139194 | 0.003748 | 0.022362 | Slpi          |
| 14875.5 | 14763.7 | 18395.772 | 22428.185 | -0.46181087  | 0.003757 | 0.0224   | Rpl9          |
| 38.4272 | 37.4375 | 111.18944 | 82.922823 | -1.359554036 | 0.003765 | 0.022429 | Vegfc         |
| 200.444 | 737.162 | 2337.5842 | 2603.5328 | -2.397374991 | 0.003781 | 0.022486 | Scd1          |
| 1392.73 | 1493.04 | 1884.1398 | 2147.4572 | -0.481584365 | 0.003792 | 0.022517 | Rpl23a-ps3    |
| 3.11572 | 27.6324 | 77.311407 | 93.897903 | -2.461739417 | 0.003797 | 0.022538 | 5930412G12Rik |
| 2792.72 | 2904.08 | 3846.4597 | 3699.8213 | -0.405675577 | 0.003812 | 0.022597 | Galnt1        |

|         |         |           |           |              |          |          |            |
|---------|---------|-----------|-----------|--------------|----------|----------|------------|
| 49.8515 | 2.67411 | 912.10087 | 439.00318 | -4.687920843 | 0.003819 | 0.022626 | Saa3       |
| 93.4715 | 159.555 | 251.91357 | 269.49918 | -1.039173629 | 0.003833 | 0.022702 | Arl10      |
| 1619.13 | 1808.59 | 2290.6762 | 2415.7369 | -0.456855228 | 0.00385  | 0.02278  | Ccdc82     |
| 14.54   | 30.3065 | 76.44274  | 73.167197 | -1.729770215 | 0.003864 | 0.02283  | Celf4      |
| 1321.06 | 1320.12 | 1694.7703 | 2226.7217 | -0.569278173 | 0.003889 | 0.022952 | Uba52      |
| 4357.85 | 5202.92 | 9496.2731 | 22903.772 | -1.760751774 | 0.00391  | 0.023046 | Lag3       |
| 62.3143 | 90.0282 | 152.88548 | 175.60127 | -1.103487219 | 0.003916 | 0.023066 | Gdap10     |
| 2174.77 | 2403.13 | 2928.2781 | 3647.3848 | -0.521766439 | 0.003926 | 0.023092 | Cdkn1b     |
| 429.969 | 393.094 | 745.31671 | 569.48468 | -0.678161787 | 0.003926 | 0.023092 | Asb1       |
| 25535.4 | 24715   | 31115.67  | 38215.227 | -0.464310231 | 0.003943 | 0.023176 | Rpl18a     |
| 16.6172 | 16.0446 | 64.281395 | 48.778131 | -1.795636926 | 0.003947 | 0.023189 | Scimp      |
| 4.15429 | 4.45684 | 23.454022 | 35.364145 | -2.765353547 | 0.003961 | 0.023263 | Tmigd3     |
| 289.762 | 404.681 | 515.11982 | 714.59962 | -0.821390658 | 0.003978 | 0.023339 | Stn1       |
| 3277.73 | 3492.38 | 4268.6321 | 5265.5993 | -0.493471723 | 0.004    | 0.023454 | Gas5       |
| 5.19286 | 3.56547 | 28.666027 | 29.266879 | -2.734018061 | 0.004001 | 0.023454 | Ifitm10    |
| 641.838 | 695.268 | 891.25285 | 1173.1141 | -0.624814755 | 0.004005 | 0.023472 | Pvr        |
| 25.9643 | 49.0253 | 86.866749 | 131.70095 | -1.533617956 | 0.004007 | 0.023475 | Zfp629     |
| 6933.51 | 8738.98 | 10176.44  | 13401.792 | -0.588998085 | 0.00401  | 0.023485 | Itk        |
| 655.339 | 652.482 | 882.56617 | 1026.7797 | -0.544757743 | 0.004022 | 0.023546 | Fam117a    |
| 547.328 | 98.9419 | 2910.0361 | 2596.216  | -3.091282215 | 0.004077 | 0.023834 | Cd200r3    |
| 235.756 | 105.182 | 600.24924 | 279.2548  | -1.371277262 | 0.004077 | 0.023834 | Gata1      |
| 431.008 | 616.827 | 1363.808  | 706.06345 | -0.982885611 | 0.004084 | 0.023858 | Samd9l     |
| 8605.61 | 8246.05 | 11054.663 | 10795.82  | -0.374840592 | 0.004104 | 0.023938 | Rps28      |
| 18820   | 17888.9 | 22762.563 | 27891.335 | -0.464476868 | 0.004111 | 0.023972 | Rps15      |
| 5921.94 | 5974.84 | 7397.5724 | 9284.9173 | -0.487509688 | 0.004121 | 0.024014 | Tpm4       |
| 1154.89 | 1466.3  | 1803.3537 | 2091.3624 | -0.570281396 | 0.004125 | 0.024027 | Sgsm2      |
| 158.902 | 41.8943 | 339.64899 | 263.40191 | -1.591378127 | 0.004142 | 0.024098 | Akr1c12    |
| 1358.45 | 1628.53 | 1966.6632 | 2496.2209 | -0.578268184 | 0.004146 | 0.024099 | Unc13a     |
| 82.0472 | 94.4851 | 153.75415 | 209.74596 | -1.037162639 | 0.004146 | 0.024099 | Dhdh       |
| 545.251 | 492.036 | 723.60002 | 823.13096 | -0.575842196 | 0.004153 | 0.024126 | Zfp652     |
| 1153.85 | 195.21  | 6777.3438 | 4453.4434 | -3.057651967 | 0.004159 | 0.024136 | Hdc        |
| 182.789 | 270.085 | 376.13303 | 439.00318 | -0.844643229 | 0.004161 | 0.024137 | Rras       |
| 912.905 | 1047.36 | 1344.6973 | 1437.7354 | -0.504394409 | 0.004203 | 0.024356 | Gm2000     |
| 14.54   | 20.5015 | 76.44274  | 47.558678 | -1.823797967 | 0.00423  | 0.024462 | Ahrr       |
| 135.014 | 214.82  | 315.3263  | 349.98309 | -0.923853162 | 0.004236 | 0.024481 | Zbtb26     |
| 1.03857 | 0.89137 | 26.060025 | 12.194533 | -4.321957963 | 0.004255 | 0.024569 | H2-M2      |
| 1.03857 | 0.89137 | 26.060025 | 12.194533 | -4.321957963 | 0.004255 | 0.024569 | Muc20      |
| 1283.68 | 2803.35 | 3823.8743 | 3937.6146 | -0.924879772 | 0.0043   | 0.024779 | Irs2       |
| 2713.79 | 2978.06 | 4059.2832 | 3660.7987 | -0.439864043 | 0.004311 | 0.024832 | Spes2      |
| 45.6972 | 26.7411 | 64.281395 | 191.45417 | -1.818273236 | 0.004314 | 0.024842 | Dkk1l      |
| 978.335 | 1203.35 | 1582.7122 | 1562.1197 | -0.526998284 | 0.004328 | 0.024909 | Rnf11      |
| 13.5014 | 12.4792 | 39.958705 | 60.972664 | -1.953862942 | 0.004339 | 0.024946 | Nipal1     |
| 721.808 | 670.309 | 952.05957 | 1040.1936 | -0.516753997 | 0.00434  | 0.024946 | Rpl36a-ps2 |
| 3738.86 | 3776.73 | 4755.0859 | 5189.9932 | -0.403850376 | 0.004352 | 0.024999 | Adipor1    |
| 2930.85 | 3577.95 | 4364.1855 | 4771.7207 | -0.488750614 | 0.004355 | 0.025007 | Zfc3h1     |

|         |         |           |           |              |          |          |               |
|---------|---------|-----------|-----------|--------------|----------|----------|---------------|
| 228.486 | 262.954 | 343.99233 | 604.84883 | -0.945761396 | 0.004358 | 0.025014 | Cox6b2        |
| 144.362 | 38.3289 | 316.19497 | 236.57394 | -1.60252736  | 0.00437  | 0.025065 | Anxa3         |
| 1452.96 | 1846.92 | 2209.8901 | 2769.3784 | -0.59260062  | 0.004375 | 0.025072 | Stx16         |
| 163.056 | 121.226 | 250.17624 | 270.71863 | -0.875155115 | 0.00438  | 0.025092 | Il11ra1       |
| 0       | 0       | 15.636015 | 8.536173  | -6.098505105 | 0.00438  | 1        | 1700016F12Rik |
| 482.936 | 475.991 | 650.63195 | 837.7644  | -0.632500965 | 0.004387 | 0.025128 | Usp40         |
| 96.5872 | 53.4821 | 229.32822 | 140.23713 | -1.307449733 | 0.004429 | 0.02533  | Rap1gap2      |
| 59.1986 | 70.4181 | 124.21945 | 157.30947 | -1.114173498 | 0.004437 | 0.025346 | Pltp          |
| 678.188 | 679.223 | 1027.6336 | 915.80941 | -0.518697985 | 0.004437 | 0.025346 | Pnpla7        |
| 295.993 | 222.842 | 381.34503 | 565.82632 | -0.867244653 | 0.004438 | 0.025346 | Rasgrp2       |
| 0       | 0.89137 | 10.42401  | 28.047425 | -5.326607593 | 0.004446 | 0.025381 | Cd300c2       |
| 320.919 | 334.263 | 464.73711 | 575.58195 | -0.664797235 | 0.004455 | 0.025408 | Rrm2b         |
| 1787.38 | 2549.31 | 4193.9267 | 8291.0629 | -1.525368546 | 0.00446  | 0.025427 | Ecm1          |
| 625.221 | 770.143 | 1020.6843 | 1040.1936 | -0.56165921  | 0.004464 | 0.025438 | Dennd1b       |
| 27.0029 | 22.2842 | 64.281395 | 79.264463 | -1.542061338 | 0.004465 | 0.025438 | Dthd1         |
| 11511.5 | 12595   | 15593.45  | 15888.257 | -0.385025209 | 0.00449  | 0.025542 | Anxa6         |
| 1158.01 | 1220.28 | 1551.4401 | 1773.0851 | -0.482316581 | 0.004497 | 0.025571 | Riok1         |
| 4.15429 | 0.89137 | 31.27203  | 19.511252 | -3.368893743 | 0.004504 | 0.025593 | Hba-a1        |
| 2684.71 | 2628.65 | 3371.2985 | 3765.6717 | -0.425362595 | 0.004508 | 0.025607 | Stxbp2        |
| 35936.7 | 33377.3 | 42979.062 | 51498.732 | -0.44679794  | 0.004532 | 0.025703 | Rps3          |
| 647.031 | 615.936 | 845.21347 | 1032.8769 | -0.571260476 | 0.004533 | 0.025703 | Golim4        |
| 393.619 | 466.186 | 620.22859 | 698.74673 | -0.61540069  | 0.004534 | 0.025705 | Nhlrc3        |
| 76.8544 | 102.507 | 114.66411 | 459.73389 | -1.674946486 | 0.004538 | 0.025716 | D630039A03Rik |
| 1797.77 | 2200.79 | 2924.8035 | 2723.0392 | -0.498077324 | 0.004577 | 0.025897 | Nub1          |
| 44.6586 | 104.29  | 192.84418 | 182.91799 | -1.330164796 | 0.004579 | 0.025897 | Dysf          |
| 259.643 | 302.174 | 437.80842 | 449.97826 | -0.658725739 | 0.004582 | 0.025897 | Fbxo4         |
| 201.483 | 254.04  | 334.43699 | 503.6342  | -0.875680327 | 0.004583 | 0.025897 | Prpf40b       |
| 67.5072 | 64.1785 | 138.9868  | 134.13986 | -1.05357667  | 0.004599 | 0.025964 | Susd2         |
| 2780.26 | 2393.32 | 3463.3773 | 3597.3872 | -0.448801288 | 0.004621 | 0.026068 | Arrb2         |
| 5.19286 | 9.80506 | 45.17071  | 31.705785 | -2.350584859 | 0.004624 | 0.026076 | Atp8b1        |
| 3.11572 | 24.9583 | 63.412727 | 90.239543 | -2.435473285 | 0.004642 | 0.026158 | Gm3667        |
| 520.325 | 453.707 | 663.66197 | 885.32308 | -0.668064817 | 0.004672 | 0.026321 | Cpm           |
| 58.1601 | 73.9836 | 135.51213 | 145.11494 | -1.083032003 | 0.00468  | 0.026357 | BC051226      |
| 3.11572 | 0.89137 | 19.979352 | 24.389066 | -3.498383266 | 0.004707 | 0.026486 | Mir7007       |
| 429.969 | 421.617 | 571.58321 | 848.73948 | -0.735902679 | 0.004708 | 0.026486 | Aplp1         |
| 2698.21 | 2722.24 | 3396.4899 | 4169.3108 | -0.480574107 | 0.004713 | 0.026502 | Rps6ka3       |
| 4319.42 | 4345.42 | 6054.6124 | 5432.6644 | -0.407023447 | 0.004719 | 0.026525 | Ctsz          |
| 384.272 | 394.876 | 533.36184 | 720.69689 | -0.684331224 | 0.004722 | 0.026533 | Dapk1         |
| 25.9643 | 36.5461 | 64.281395 | 128.04259 | -1.611935003 | 0.004729 | 0.026553 | Kcnmb4        |
| 1.03857 | 4.45684 | 35.615367 | 18.291799 | -3.271037232 | 0.004741 | 0.026598 | Tubb1         |
| 2225.66 | 2629.54 | 3112.4356 | 4066.8767 | -0.563635648 | 0.004767 | 0.026694 | Gmfg          |
| 44.6586 | 69.5268 | 120.74478 | 146.33439 | -1.219476168 | 0.004772 | 0.026703 | P3h3          |
| 2403.26 | 2699.96 | 3247.0791 | 4002.2457 | -0.505812182 | 0.004774 | 0.026708 | Arglu1        |
| 245.103 | 279.89  | 429.99041 | 403.63904 | -0.666862633 | 0.004776 | 0.02671  | Tanc2         |
| 423.738 | 469.751 | 622.83459 | 732.89142 | -0.599575974 | 0.004849 | 0.027089 | Rhbdd2        |

|         |         |           |           |              |          |          |               |
|---------|---------|-----------|-----------|--------------|----------|----------|---------------|
| 292.877 | 930.589 | 2731.0906 | 2573.0464 | -2.115823262 | 0.004887 | 0.027254 | Ramp3         |
| 86.2015 | 12.4792 | 774.85141 | 367.05544 | -3.534844764 | 0.00489  | 0.02726  | Adgre1        |
| 69.5844 | 51.6994 | 132.03746 | 131.70095 | -1.123963994 | 0.00491  | 0.027355 | Tiam2         |
| 91.3944 | 90.9196 | 202.39953 | 156.09002 | -0.978812639 | 0.004912 | 0.027355 | Vldlr         |
| 1223.44 | 2568.03 | 4748.1365 | 6836.2551 | -1.611178205 | 0.004947 | 0.027514 | Il7r          |
| 402.966 | 316.436 | 712.30735 | 507.29256 | -0.764507095 | 0.004965 | 0.027591 | 8-Mar         |
| 39894.7 | 39339.7 | 48633.218 | 57855.741 | -0.426470715 | 0.004982 | 0.027669 | Rpl4          |
| 494.36  | 638.22  | 803.51743 | 967.02645 | -0.642585186 | 0.005018 | 0.027851 | Senp7         |
| 0       | 0       | 7.8180075 | 15.852893 | -6.05766761  | 0.00502  | 1        | Mall          |
| 529.672 | 508.08  | 700.146   | 865.81183 | -0.59216044  | 0.005022 | 0.027862 | B4galt7       |
| 40.5043 | 60.6131 | 86.866749 | 207.30706 | -1.53270067  | 0.00503  | 0.027888 | Tspan2        |
| 9.34715 | 22.2842 | 43.433375 | 89.020089 | -2.050681265 | 0.005032 | 0.027888 | Tctex1d1      |
| 1427    | 1829.09 | 2380.1489 | 2307.2056 | -0.525259796 | 0.005063 | 0.028034 | 2810474O19Rik |
| 13.5014 | 13.3705 | 59.938057 | 40.241958 | -1.903611837 | 0.005068 | 0.028052 | Nynrin        |
| 318.842 | 353.873 | 462.13111 | 684.11329 | -0.765973416 | 0.005076 | 0.028082 | Card6         |
| 49.8515 | 47.2425 | 88.604084 | 157.30947 | -1.335630419 | 0.005113 | 0.028249 | Tubg2         |
| 4.15429 | 12.4792 | 34.7467   | 52.436491 | -2.3698834   | 0.005115 | 0.02825  | Gm35037       |
| 6.23143 | 14.2619 | 32.140697 | 68.289384 | -2.275124462 | 0.00512  | 0.02827  | AC158622.3    |
| 104.896 | 19.6101 | 919.05021 | 356.08036 | -3.358287856 | 0.005145 | 0.028395 | Len2          |
| 15912   | 15873.5 | 19532.857 | 23034.253 | -0.421283437 | 0.005206 | 0.028706 | Rpl37a        |
| 559.791 | 455.489 | 705.35801 | 882.88418 | -0.644975176 | 0.005217 | 0.028756 | Rab3d         |
| 9.34715 | 6.23958 | 54.726052 | 25.608519 | -2.380117831 | 0.005237 | 0.028859 | Oas1g         |
| 1086.35 | 1158.78 | 1460.2301 | 1685.2844 | -0.485493004 | 0.005244 | 0.028876 | Suco          |
| 105.934 | 158.664 | 372.65836 | 204.86815 | -1.127410212 | 0.00525  | 0.028879 | C430002N11Rik |
| 3428.33 | 3368.48 | 4197.4013 | 5771.6724 | -0.552189247 | 0.005254 | 0.028884 | Mdh1          |
| 100.742 | 139.054 | 206.74286 | 254.86574 | -0.940195024 | 0.005276 | 0.028971 | Gm8399        |
| 214.984 | 210.363 | 406.53639 | 310.96059 | -0.757189263 | 0.00528  | 0.028982 | P2rx7         |
| 1246.29 | 219.277 | 5734.9428 | 6319.2069 | -3.040178553 | 0.005295 | 0.029049 | Rab44         |
| 1225.52 | 1263.07 | 1587.0555 | 1990.1478 | -0.522480031 | 0.00531  | 0.02909  | Rpl31-ps8     |
| 16.6172 | 8.91369 | 66.887397 | 37.803052 | -2.05036098  | 0.005315 | 0.02911  | 1810011H11Rik |
| 63.3529 | 65.9613 | 136.3808  | 130.4815  | -1.045403526 | 0.005338 | 0.029216 | Ahr           |
| 273.145 | 263.845 | 385.68837 | 480.46459 | -0.687727149 | 0.005377 | 0.029407 | Dlg3          |
| 2688.86 | 2729.37 | 3418.2066 | 3798.597  | -0.41315925  | 0.005382 | 0.029426 | Sh3glb1       |
| 83.0858 | 101.616 | 152.88548 | 234.13503 | -1.061535381 | 0.0054   | 0.029491 | Plexd1        |
| 116.32  | 140.836 | 205.00553 | 284.13261 | -0.922878591 | 0.005404 | 0.029496 | Mtm1          |
| 1967.06 | 2095.61 | 2561.7004 | 3119.3615 | -0.483017368 | 0.005491 | 0.02993  | 2700060E02Rik |
| 6.23143 | 16.0446 | 66.01873  | 36.583598 | -2.196320787 | 0.005502 | 0.029976 | Gm9885        |
| 1.03857 | 2.67411 | 25.191357 | 17.072346 | -3.488419222 | 0.005505 | 0.029985 | Tgfa          |
| 1.03857 | 0       | 13.89868  | 20.730706 | -5.150955429 | 0.005514 | 0.030011 | Clec4a2       |
| 25445   | 29896.5 | 41305.139 | 35003.187 | -0.463496018 | 0.005517 | 0.030018 | Vim           |
| 9198.64 | 9911.13 | 12196.092 | 12546.955 | -0.372631989 | 0.00552  | 0.030023 | Wdr1          |
| 2862.31 | 3216.95 | 4133.1199 | 3980.2955 | -0.416336018 | 0.005533 | 0.030071 | Tmem127       |
| 15.5786 | 13.3705 | 52.988717 | 47.558678 | -1.800285278 | 0.005537 | 0.030077 | Ccdc8         |
| 0       | 0       | 19.979352 | 4.8778131 | -6.142657942 | 0.005549 | 1        | Psg17         |
| 1056.23 | 916.327 | 1278.6786 | 1710.893  | -0.599113315 | 0.00558  | 0.030271 | Dusp7         |

|         |         |           |           |              |          |          |               |
|---------|---------|-----------|-----------|--------------|----------|----------|---------------|
| 32.1957 | 71.3095 | 131.16879 | 139.01767 | -1.377572484 | 0.005606 | 0.03039  | Chac1         |
| 21.81   | 22.2842 | 51.251382 | 87.800636 | -1.650527064 | 0.005619 | 0.030443 | Car9          |
| 246.142 | 775.491 | 1895.4325 | 2862.0568 | -2.218907356 | 0.005624 | 0.030458 | 4930539E08Rik |
| 5553.25 | 6262.76 | 8703.1796 | 7433.7872 | -0.449737291 | 0.00563  | 0.030472 | Rap1b         |
| 9.34715 | 40.1116 | 111.18944 | 430.46701 | -3.448839192 | 0.005657 | 0.030605 | Ccr8          |
| 1.03857 | 3.56547 | 9.5553424 | 47.558678 | -3.598746721 | 0.005697 | 0.030783 | AC117245.3    |
| 6842.12 | 8760.37 | 12640.849 | 10121.462 | -0.544913674 | 0.005726 | 0.030914 | Rsrp1         |
| 939.908 | 963.57  | 1216.1345 | 1632.8479 | -0.580510165 | 0.005737 | 0.030954 | Fln           |
| 1500.74 | 1761.34 | 2096.9633 | 2676.7    | -0.548347607 | 0.005746 | 0.030985 | Scarb2        |
| 5617.64 | 5825.09 | 6996.248  | 9732.4566 | -0.547614341 | 0.005757 | 0.031013 | AC147029.1    |
| 607.565 | 484.013 | 754.87205 | 948.73465 | -0.641699633 | 0.005763 | 0.031032 | Trpm4         |
| 1074.92 | 1106.19 | 2026.6013 | 1369.446  | -0.639859003 | 0.005828 | 0.031354 | Iigp1         |
| 67.5072 | 73.0922 | 130.30012 | 157.30947 | -1.029073085 | 0.005873 | 0.031562 | Trbv14        |
| 12.4629 | 0.89137 | 68.624732 | 31.705785 | -2.936389259 | 0.005877 | 0.031576 | Marco         |
| 17316.1 | 21882.2 | 29542.513 | 25628.03  | -0.493107611 | 0.00589  | 0.031632 | Odc1          |
| 106.973 | 110.53  | 171.99616 | 254.86574 | -0.968459212 | 0.005921 | 0.031769 | Gm10243       |
| 5.19286 | 1.78274 | 34.7467   | 19.511252 | -2.987383054 | 0.005969 | 0.031946 | Htr7          |
| 52.9672 | 103.399 | 249.30757 | 141.45658 | -1.320874275 | 0.00597  | 0.031946 | Upk3bl        |
| 15.5786 | 22.2842 | 46.908045 | 81.70337  | -1.753530355 | 0.00602  | 0.032172 | P3h4          |
| 1.03857 | 3.56547 | 20.84802  | 24.389066 | -3.266307868 | 0.006062 | 0.032321 | Gm16587       |
| 2772.99 | 3540.52 | 4306.8534 | 4594.9    | -0.495270516 | 0.00609  | 0.032435 | Ip6k1         |
| 276.26  | 488.47  | 846.08214 | 592.65429 | -0.911522327 | 0.006097 | 0.032455 | Atp10d        |
| 14.54   | 20.5015 | 39.958705 | 91.458996 | -1.895672001 | 0.00611  | 0.032513 | 4930565N06Rik |
| 1.03857 | 12.4792 | 86.866749 | 23.169612 | -3.009830815 | 0.006124 | 0.032574 | Kcnd3         |
| 446.586 | 462.62  | 654.97529 | 658.50477 | -0.530430697 | 0.006128 | 0.032587 | Sesn1         |
| 401.928 | 386.854 | 548.12919 | 634.11571 | -0.582607066 | 0.006153 | 0.032689 | Fam199x       |
| 79.9701 | 96.2678 | 192.84418 | 153.65111 | -0.976371898 | 0.006159 | 0.032706 | Gm8451        |
| 0       | 0       | 6.94934   | 15.852893 | -6.002969886 | 0.006164 | 1        | Nmur1         |
| 1365.72 | 1515.33 | 1841.5751 | 2235.2579 | -0.499863551 | 0.006171 | 0.032761 | Rhoh          |
| 340.652 | 432.314 | 537.70518 | 746.30541 | -0.729334719 | 0.006201 | 0.032885 | Pou6f1        |
| 810.086 | 752.315 | 1014.6036 | 1286.5232 | -0.557510605 | 0.006232 | 0.033011 | Ifnar2        |
| 22.8486 | 6.23958 | 61.675392 | 59.753211 | -2.075880568 | 0.006244 | 0.033028 | St6galnac3    |
| 26499.2 | 26056.5 | 31928.742 | 40240.739 | -0.457485271 | 0.006246 | 0.033029 | Rpl5          |
| 613.796 | 841.452 | 1174.4385 | 1056.0465 | -0.615661783 | 0.006266 | 0.033123 | Ypel5         |
| 22596.2 | 22162.1 | 27758.27  | 29391.263 | -0.352560055 | 0.006283 | 0.033192 | Rps5          |
| 686.496 | 766.577 | 949.45357 | 1234.0867 | -0.585819075 | 0.006293 | 0.033232 | Sec23a        |
| 0       | 0       | 6.0806725 | 17.072346 | -6.023866329 | 0.006296 | 1        | AC153365.1    |
| 275.222 | 290.586 | 428.25307 | 436.56427 | -0.611430073 | 0.006296 | 0.033238 | Nln           |
| 157.863 | 239.778 | 341.38633 | 368.27489 | -0.832638107 | 0.006305 | 0.033274 | Gm3571        |
| 3102.22 | 2810.49 | 3776.0976 | 4103.4603 | -0.414215214 | 0.00632  | 0.033325 | Calu          |
| 2228.78 | 2193.66 | 2866.6027 | 2915.7128 | -0.386768582 | 0.006321 | 0.033325 | Ergic3        |
| 7.27001 | 4.45684 | 58.200722 | 17.072346 | -2.699523547 | 0.006329 | 0.03336  | Mfap3l        |
| 1025.07 | 871.759 | 1289.1026 | 1387.7378 | -0.497064411 | 0.006387 | 0.033631 | Il3ra         |
| 67.5072 | 66.8526 | 125.08812 | 149.99275 | -1.031307537 | 0.006413 | 0.03375  | Sh2b2         |
| 24.9257 | 73.9836 | 141.5928  | 143.89549 | -1.522372325 | 0.006414 | 0.03375  | Gprc5a        |



|         |         |           |           |              |          |          |               |
|---------|---------|-----------|-----------|--------------|----------|----------|---------------|
| 19.7329 | 58.8303 | 182.42017 | 84.142276 | -1.759775422 | 0.006422 | 0.033781 | Trim30c       |
| 561.868 | 630.198 | 885.17218 | 823.13096 | -0.519145815 | 0.006444 | 0.033876 | Cisd3         |
| 134916  | 133494  | 163972.28 | 183770.39 | -0.373574245 | 0.006472 | 0.033988 | Eef2          |
| 364.539 | 303.957 | 504.69581 | 519.4871  | -0.616338446 | 0.006502 | 0.034136 | Pik3cb        |
| 4490.79 | 3749.1  | 5741.8921 | 5441.2005 | -0.440903543 | 0.006523 | 0.034236 | Uald2         |
| 652.223 | 702.399 | 886.90951 | 1113.3608 | -0.560605343 | 0.006542 | 0.0343   | Uck11         |
| 636.645 | 656.047 | 851.29414 | 1023.1213 | -0.534583465 | 0.006565 | 0.034385 | Lin54         |
| 956.525 | 868.193 | 1388.9993 | 1191.4059 | -0.501191815 | 0.006568 | 0.034391 | Lrpap1        |
| 3.11572 | 14.2619 | 28.666027 | 74.38665  | -2.545748514 | 0.00658  | 0.034444 | Zfp973        |
| 3.11572 | 13.3705 | 53.857385 | 35.364145 | -2.421246938 | 0.006596 | 0.034514 | Plat          |
| 2.07714 | 0       | 40.827372 | 6.0972664 | -4.566191082 | 0.006606 | 0.034538 | Ms4a7         |
| 6853.54 | 6823.43 | 8326.1779 | 10772.65  | -0.48151347  | 0.006636 | 0.034657 | Rpl7a         |
| 10.3857 | 35.6547 | 87.735417 | 78.04501  | -1.838509923 | 0.006641 | 0.034673 | Tmem254c      |
| 329.227 | 346.742 | 456.9191  | 654.84641 | -0.715112609 | 0.006673 | 0.03483  | Mr1           |
| 230.563 | 262.954 | 378.73903 | 397.54177 | -0.651905846 | 0.00673  | 0.035095 | Zfp120        |
| 4239.45 | 4925.7  | 5768.8208 | 6967.956  | -0.474397319 | 0.006759 | 0.035187 | Abca7         |
| 11.4243 | 27.6324 | 48.64538  | 98.775716 | -1.902172355 | 0.00677  | 0.035209 | Gm26660       |
| 27.0029 | 39.2202 | 66.01873  | 124.38423 | -1.514146892 | 0.006776 | 0.035209 | Lad1          |
| 7.27001 | 0       | 28.666027 | 42.680865 | -3.32821373  | 0.006837 | 0.035483 | Fgf3          |
| 11.4243 | 16.0446 | 46.908045 | 49.997585 | -1.812525633 | 0.006844 | 0.035494 | Dusp18        |
| 0       | 0       | 10.42401  | 10.97508  | -5.9173364   | 0.006852 | 1        | AC153365.2    |
| 1644.06 | 2189.2  | 2375.8056 | 4248.5752 | -0.788491062 | 0.006853 | 0.035527 | Ppp1r16b      |
| 36.35   | 10.6964 | 64.281395 | 110.97025 | -1.903642119 | 0.006887 | 0.035691 | Emid1         |
| 15037.5 | 14604.2 | 18036.143 | 21739.194 | -0.424156108 | 0.006895 | 0.035724 | Rpl31         |
| 1609.79 | 1791.65 | 2189.0421 | 2436.4677 | -0.442755948 | 0.006963 | 0.036019 | Pank2         |
| 1429.08 | 1528.7  | 1916.2805 | 2048.6815 | -0.42222811  | 0.007021 | 0.03628  | Gng5          |
| 231.602 | 376.158 | 401.32438 | 925.56504 | -1.123668225 | 0.007048 | 0.036375 | Gata3         |
| 100.742 | 107.856 | 161.57215 | 257.30464 | -1.000979008 | 0.00705  | 0.036375 | Abhd14b       |
| 4.15429 | 0       | 39.090037 | 14.633439 | -3.745553749 | 0.007057 | 0.036397 | Cxcl1         |
| 0       | 0.89137 | 33.878032 | 4.8778131 | -5.357568437 | 0.007089 | 0.03654  | Syt13         |
| 397.773 | 361.004 | 608.93591 | 529.24272 | -0.58694625  | 0.007095 | 0.036553 | Tmem9         |
| 2386.64 | 2627.75 | 3394.7526 | 3233.9901 | -0.402643928 | 0.007131 | 0.03672  | Riok3         |
| 204.599 | 44.5684 | 1719.9616 | 548.75398 | -3.187669982 | 0.007135 | 0.036729 | Acod1         |
| 52.9672 | 85.5714 | 121.61345 | 207.30706 | -1.239959717 | 0.007138 | 0.036732 | Dgkh          |
| 23.8872 | 2.67411 | 82.523412 | 58.533757 | -2.425989921 | 0.007183 | 0.036929 | Homer2        |
| 49.8515 | 114.095 | 146.80481 | 285.35207 | -1.391514965 | 0.007253 | 0.03722  | E430014B02Rik |
| 572.253 | 141.728 | 2076.984  | 1829.1799 | -2.45226329  | 0.007263 | 0.037258 | Serpinb1a     |
| 270.029 | 659.613 | 1287.3652 | 2152.335  | -1.88697947  | 0.007273 | 0.037285 | Cysltr2       |
| 1465.43 | 1492.15 | 1942.3405 | 1964.5392 | -0.401472453 | 0.007277 | 0.037292 | Psenen        |
| 47.7743 | 28.5238 | 200.66219 | 58.533757 | -1.772844239 | 0.007293 | 0.037339 | Kalrn         |
| 5512.74 | 11285.6 | 15025.342 | 14331.015 | -0.80526222  | 0.007348 | 0.037574 | Rps27a        |
| 667.802 | 910.087 | 1312.5566 | 1102.3858 | -0.613907578 | 0.00736  | 0.037604 | Snape1        |
| 607.565 | 749.641 | 911.2322  | 1140.1888 | -0.594120912 | 0.007387 | 0.037712 | Ddit3         |
| 1852.81 | 1999.34 | 2521.7417 | 2558.413  | -0.398943997 | 0.00741  | 0.037818 | Sppl2a        |
| 653.262 | 674.766 | 879.96017 | 993.85442 | -0.495528357 | 0.007425 | 0.03787  | Rpl9-ps4      |

|         |         |           |           |              |          |          |               |
|---------|---------|-----------|-----------|--------------|----------|----------|---------------|
| 1844.5  | 2291.71 | 2637.2745 | 3509.5865 | -0.570749485 | 0.007436 | 0.037909 | Spag9         |
| 802.816 | 1033.1  | 1471.5227 | 1247.5007 | -0.566638602 | 0.00748  | 0.038106 | Cpeb4         |
| 5830.55 | 9898.65 | 15538.724 | 26624.323 | -1.422486875 | 0.007488 | 0.038132 | Thy1          |
| 180.712 | 179.165 | 438.67708 | 247.54902 | -0.934777463 | 0.007513 | 0.03825  | Hist1h1c      |
| 1409.34 | 1360.23 | 1958.8452 | 1766.9878 | -0.428578752 | 0.007528 | 0.03829  | Edem2         |
| 443.47  | 512.537 | 757.47806 | 657.28532 | -0.565920434 | 0.007597 | 0.038615 | Stx2          |
| 92.4329 | 123.9   | 198.92486 | 202.42924 | -0.888824495 | 0.007607 | 0.038637 | Adamts15      |
| 2029.37 | 2087.59 | 2458.329  | 4276.6227 | -0.709469531 | 0.007626 | 0.038708 | Cd247         |
| 2316.02 | 2494.94 | 3069.0023 | 3260.8181 | -0.395455261 | 0.007627 | 0.038708 | Golga2        |
| 5.19286 | 9.80506 | 36.484035 | 34.144692 | -2.225104083 | 0.007651 | 0.038807 | Smad9         |
| 10618.4 | 9481.49 | 12315.099 | 15451.693 | -0.466076256 | 0.007731 | 0.039137 | Itgb2         |
| 428.93  | 398.442 | 543.78585 | 795.08354 | -0.692480114 | 0.007748 | 0.039184 | Gm9843        |
| 12.4629 | 41.003  | 79.048742 | 102.43408 | -1.75179245  | 0.007815 | 0.039474 | Fgfl1         |
| 13802.6 | 20745.7 | 23706.805 | 28992.502 | -0.609080604 | 0.007826 | 0.039505 | Satb1         |
| 239.91  | 303.957 | 357.02234 | 704.844   | -0.962037265 | 0.007857 | 0.039625 | Cracr2a       |
| 21611.7 | 20912.4 | 25741.224 | 30796.073 | -0.410861388 | 0.007881 | 0.039732 | Tmsb10        |
| 2.07714 | 3.56547 | 25.191357 | 19.511252 | -2.975995263 | 0.007915 | 0.039879 | AC152979.5    |
| 6.23143 | 0.89137 | 34.7467   | 21.950159 | -3.027689871 | 0.007939 | 0.039988 | Mmp2          |
| 1.03857 | 0       | 12.161345 | 19.511252 | -5.020182101 | 0.007951 | 0.039998 | Gm38708       |
| 1.03857 | 0       | 16.504682 | 14.633439 | -5.001828974 | 0.007955 | 0.040005 | F830208F22Rik |
| 143.323 | 133.705 | 201.53086 | 328.03293 | -0.931244356 | 0.008041 | 0.040362 | Gm16754       |
| 7893.15 | 7815.52 | 9522.3331 | 11578.709 | -0.425569814 | 0.008048 | 0.040384 | Rpl23a        |
| 11104.4 | 10636.7 | 13333.177 | 14752.946 | -0.369356294 | 0.008058 | 0.040421 | Rpl36         |
| 94.5101 | 106.964 | 158.09748 | 239.01284 | -0.973820088 | 0.00807  | 0.040464 | Tmem241       |
| 118.397 | 342.286 | 1120.5811 | 735.33033 | -2.009683984 | 0.008071 | 0.040464 | Mycn          |
| 31.1572 | 59.7217 | 135.51213 | 96.336809 | -1.34868708  | 0.008151 | 0.040826 | Palld         |
| 747.772 | 708.638 | 994.62428 | 1006.049  | -0.458236835 | 0.008178 | 0.040934 | Crtap         |
| 8.30858 | 36.5461 | 79.048742 | 91.458996 | -1.914564883 | 0.008195 | 0.041007 | Fcmr          |
| 341.69  | 315.545 | 475.16112 | 503.6342  | -0.574480142 | 0.0082   | 0.04102  | Mospd2        |
| 12.4629 | 29.4152 | 60.806725 | 76.825557 | -1.704795582 | 0.008246 | 0.041198 | Gm45867       |
| 182.789 | 198.775 | 288.39761 | 331.69129 | -0.698129242 | 0.00826  | 0.041244 | Ms4a6c        |
| 2149.84 | 3242.8  | 3812.5816 | 4429.0543 | -0.611450457 | 0.00828  | 0.041319 | Itgav         |
| 2.07714 | 0.89137 | 26.928692 | 10.97508  | -3.706552198 | 0.008296 | 0.041358 | Lpar1         |
| 623.143 | 572.259 | 791.35609 | 930.44285 | -0.525552445 | 0.008301 | 0.041358 | Mcu           |
| 0       | 0       | 4.3433375 | 18.291799 | -5.989657178 | 0.008314 | 1        | Gm20476       |
| 141.246 | 148.859 | 271.02426 | 224.3794  | -0.773973072 | 0.008315 | 0.041401 | Optn          |
| 3032.63 | 664.07  | 16700.133 | 8272.7711 | -2.756139444 | 0.008317 | 0.041401 | Csf2rb        |
| 487.09  | 598.108 | 787.01275 | 797.52245 | -0.545032777 | 0.008372 | 0.041611 | Snx13         |
| 31.1572 | 38.3289 | 85.129414 | 82.922823 | -1.27186244  | 0.00838  | 0.041611 | Dapk2         |
| 12426.5 | 13629   | 15461.413 | 24303.704 | -0.609788565 | 0.008405 | 0.041683 | Gimap3        |
| 47.7743 | 222.842 | 1130.1364 | 669.47985 | -2.732533869 | 0.008462 | 0.041912 | Mylk          |
| 2592.28 | 2363.91 | 3149.7883 | 3386.4218 | -0.399147557 | 0.008466 | 0.041912 | Gimap5        |
| 1849.7  | 2318.45 | 2848.3607 | 2925.4684 | -0.469672374 | 0.008488 | 0.041988 | Ly75          |
| 977.297 | 882.455 | 1485.4214 | 1185.3086 | -0.523554921 | 0.00849  | 0.041988 | Nrros         |
| 911.867 | 927.915 | 1284.7592 | 1204.8198 | -0.436788563 | 0.00853  | 0.042159 | Ostm1         |

|         |         |           |           |              |          |          |            |
|---------|---------|-----------|-----------|--------------|----------|----------|------------|
| 100.742 | 32.9806 | 310.98296 | 113.40916 | -1.673133474 | 0.00854  | 0.042178 | Podxl      |
| 31.1572 | 31.1979 | 66.887397 | 92.678449 | -1.351191258 | 0.008541 | 0.042178 | Slc12a5    |
| 18264.3 | 27658.3 | 33421.982 | 34945.873 | -0.574065245 | 0.008559 | 0.042212 | Malat1     |
| 3888.42 | 4057.51 | 4806.3372 | 6441.1522 | -0.500907891 | 0.008569 | 0.042252 | Ube2h      |
| 872.401 | 881.564 | 1217.0032 | 1157.2612 | -0.437220641 | 0.008576 | 0.04227  | Cln5       |
| 981.451 | 1206.02 | 2077.8526 | 1373.1044 | -0.65839908  | 0.008611 | 0.042403 | Irf5       |
| 997.03  | 970.7   | 1227.4272 | 1687.7233 | -0.565865245 | 0.008642 | 0.042494 | Naxe       |
| 355.192 | 427.857 | 550.73519 | 636.55461 | -0.59825037  | 0.008653 | 0.04252  | Eci1       |
| 12338.2 | 11148.3 | 14078.494 | 20231.949 | -0.546705838 | 0.008664 | 0.042565 | Mlec       |
| 302.225 | 95.3764 | 1066.7237 | 675.57712 | -2.132677553 | 0.008746 | 0.042885 | Btk        |
| 7.27001 | 16.0446 | 32.140697 | 68.289384 | -2.090163673 | 0.008789 | 0.043082 | AC135019.1 |
| 149.554 | 237.995 | 297.08428 | 437.78373 | -0.918751439 | 0.008796 | 0.043096 | mt-Tc      |
| 57.1215 | 92.7023 | 119.87611 | 245.11011 | -1.277407935 | 0.008797 | 0.043096 | Neil2      |
| 6614.67 | 6598.8  | 8071.6584 | 9032.4905 | -0.372167408 | 0.008805 | 0.043112 | Atp5d      |
| 768.544 | 947.525 | 1104.9451 | 1534.0722 | -0.6192477   | 0.008831 | 0.043186 | Kdm7a      |
| 0       | 0       | 19.110685 | 3.6583598 | -6.01673549  | 0.008859 | 1        | Notum      |
| 13.5014 | 2.67411 | 53.857385 | 32.925239 | -2.446501046 | 0.008867 | 0.043346 | Cd276      |
| 73.7386 | 189.862 | 370.92102 | 830.44768 | -2.186724903 | 0.00889  | 0.043442 | Chit1      |
| 8.30858 | 16.936  | 42.564707 | 52.436491 | -1.899370359 | 0.008892 | 0.043442 | Bach2it1   |
| 676.111 | 1002.79 | 1263.9112 | 1320.6679 | -0.621354227 | 0.008976 | 0.043762 | Mir142hg   |
| 4979.95 | 5500.64 | 6977.1373 | 6611.8757 | -0.374720491 | 0.009043 | 0.044047 | Socs1      |
| 37.3886 | 14.2619 | 100.76543 | 64.631024 | -1.691259976 | 0.009062 | 0.04413  | Cavin1     |
| 12.4629 | 10.6964 | 35.615367 | 49.997585 | -1.884232423 | 0.009109 | 0.044317 | Spink2     |
| 236.795 | 254.04  | 355.28501 | 408.51685 | -0.635792591 | 0.009206 | 0.044707 | Nudt2      |
| 99.703  | 37.4375 | 229.32822 | 135.35931 | -1.418396207 | 0.00923  | 0.044795 | Naip6      |
| 280.415 | 349.417 | 451.7071  | 535.33999 | -0.645427596 | 0.009232 | 0.044795 | Neu3       |
| 106.973 | 106.964 | 187.63218 | 189.01526 | -0.815919959 | 0.009243 | 0.044822 | Ikbip      |
| 895.249 | 1002.79 | 1272.5979 | 1314.5706 | -0.446193359 | 0.009294 | 0.045012 | Fbxo28     |
| 160.979 | 160.446 | 227.59088 | 358.51926 | -0.862964446 | 0.00931  | 0.04504  | Nadsyn1    |
| 204.599 | 250.475 | 328.35631 | 425.58919 | -0.724759765 | 0.009354 | 0.045194 | Ankrd24    |
| 39.4658 | 47.2425 | 84.260747 | 117.06751 | -1.209123397 | 0.009365 | 0.045222 | Gm10382    |
| 6182.62 | 16177.4 | 33628.725 | 38859.098 | -1.696792833 | 0.009378 | 0.045272 | Scd2       |
| 331.305 | 330.698 | 496.00914 | 475.58678 | -0.554042787 | 0.009396 | 0.045329 | Tstd3      |
| 1.03857 | 0.89137 | 19.110685 | 12.194533 | -4.030094101 | 0.009408 | 0.045375 | Kcnc1      |
| 127.744 | 185.405 | 239.75223 | 347.54419 | -0.902343303 | 0.009417 | 0.045402 | Kremen2    |
| 61.2758 | 79.3318 | 179.81417 | 118.28697 | -1.086235564 | 0.009419 | 0.045402 | Ube2cbp    |
| 584.716 | 418.943 | 658.44996 | 1086.5329 | -0.797123109 | 0.009423 | 0.045406 | Ptpn18     |
| 13.5014 | 1.78274 | 63.412727 | 29.266879 | -2.624768012 | 0.009435 | 0.045428 | Prtn3      |
| 3.11572 | 1.78274 | 29.534695 | 13.413986 | -3.153933215 | 0.009436 | 0.045428 | Fstl1      |
| 39.4658 | 24.067  | 85.129414 | 78.04501  | -1.367652024 | 0.009441 | 0.04544  | Tifa       |
| 2077.14 | 2390.65 | 2847.492  | 3174.2369 | -0.430016144 | 0.009474 | 0.045562 | Npc1       |
| 4950.87 | 6274.34 | 7126.5481 | 8798.3554 | -0.504234471 | 0.009475 | 0.045562 | Bcl2       |
| 2579.81 | 524.125 | 9438.0723 | 8054.4889 | -2.494679236 | 0.009496 | 0.045637 | Gata2      |
| 434.123 | 541.061 | 689.72199 | 754.84158 | -0.565153288 | 0.009504 | 0.045658 | Snx14      |
| 193.174 | 216.603 | 296.21562 | 376.81106 | -0.712482354 | 0.009522 | 0.045732 | Rab33b     |

|         |         |           |           |              |          |          |               |
|---------|---------|-----------|-----------|--------------|----------|----------|---------------|
| 19.7329 | 16.0446 | 53.857385 | 53.655944 | -1.59054108  | 0.009533 | 0.04577  | Ctnnd1        |
| 4778.47 | 6565.82 | 9451.1023 | 7344.7671 | -0.566176411 | 0.009597 | 0.046064 | St3gal1       |
| 6.23143 | 15.1533 | 52.12005  | 36.583598 | -2.043842781 | 0.009602 | 0.046075 | Cd36          |
| 425.815 | 489.361 | 648.89462 | 671.91876 | -0.528172708 | 0.009636 | 0.046204 | Klc4          |
| 127.744 | 126.574 | 215.42954 | 215.84323 | -0.762024357 | 0.009637 | 0.046204 | Abcb1a        |
| 0       | 0.89137 | 26.928692 | 6.0972664 | -5.126578873 | 0.00971  | 0.046494 | Calca         |
| 1322.1  | 1368.25 | 1739.0723 | 1806.0103 | -0.397666647 | 0.009731 | 0.046569 | Brox          |
| 1348.07 | 1333.49 | 1730.3856 | 1797.4741 | -0.395517952 | 0.009757 | 0.046665 | Tpd52         |
| 717.654 | 891.369 | 1064.9863 | 1295.0594 | -0.551018763 | 0.009762 | 0.046665 | Tmem2         |
| 41.5429 | 48.1339 | 89.472752 | 110.97025 | -1.155679206 | 0.00977  | 0.04669  | Tmem253       |
| 33.2343 | 40.1116 | 65.150062 | 132.92041 | -1.425107259 | 0.009781 | 0.046724 | 2510009E07Rik |
| 331.305 | 379.723 | 484.71646 | 609.72664 | -0.619551413 | 0.009783 | 0.046724 | Lmf1          |
| 77.8929 | 132.814 | 162.44082 | 313.39949 | -1.169130165 | 0.009877 | 0.047121 | Ccdc17        |
| 62.3143 | 89.1369 | 112.92677 | 256.08519 | -1.278100653 | 0.00988  | 0.047121 | Gm17552       |
| 221.216 | 328.024 | 429.12174 | 485.34241 | -0.732692476 | 0.009887 | 0.047134 | Dnajb14       |
| 78.9315 | 161.338 | 231.06555 | 270.71863 | -1.057752332 | 0.00989  | 0.047134 | Usp11         |
| 2034.56 | 2320.23 | 2741.5146 | 3163.2618 | -0.43860567  | 0.009896 | 0.047152 | Rbms1         |
| 2317.06 | 2504.75 | 3048.1542 | 3246.1846 | -0.384084358 | 0.009913 | 0.047217 | Zcchc6        |
| 4120.02 | 4348.99 | 5553.3913 | 5289.9883 | -0.356600256 | 0.00992  | 0.047238 | Rrbp1         |
| 5.19286 | 10.6964 | 27.79736  | 46.339225 | -2.20502036  | 0.009963 | 0.047397 | Slc9a3r2      |
| 571.215 | 530.364 | 732.2867  | 834.10604 | -0.507110433 | 0.009979 | 0.047447 | Arsa          |
| 13.5014 | 16.936  | 48.64538  | 48.778131 | -1.674884267 | 0.010002 | 0.047512 | Aevr1c        |
| 4.15429 | 0       | 24.32269  | 21.950159 | -3.526331203 | 0.010008 | 0.047514 | Cd300ld       |
| 1.03857 | 5.34821 | 33.009365 | 18.291799 | -2.983077155 | 0.010012 | 0.047521 | Gm29040       |
| 4.15429 | 1.78274 | 20.84802  | 23.169612 | -2.908304974 | 0.010029 | 0.047565 | AC160562.1    |
| 364.539 | 250.475 | 457.78777 | 558.5096  | -0.72497728  | 0.010031 | 0.047565 | Tspan4        |
| 11.4243 | 3.56547 | 66.887397 | 19.511252 | -2.549037994 | 0.010033 | 0.047565 | Tgfb1         |
| 668.841 | 807.58  | 959.00891 | 1240.184  | -0.573060683 | 0.010043 | 0.047596 | Rassf1        |
| 4667.34 | 4166.26 | 6083.2785 | 5513.1483 | -0.392920204 | 0.01007  | 0.047696 | Gnptab        |
| 835.012 | 1231.87 | 1345.5659 | 2093.8013 | -0.733360247 | 0.01012  | 0.047907 | Atg9b         |
| 64.3915 | 152.424 | 307.50829 | 197.55143 | -1.218457478 | 0.010168 | 0.048062 | Pcsk1         |
| 273.145 | 292.369 | 410.01106 | 439.00318 | -0.584890108 | 0.010171 | 0.048063 | Zc3h11a       |
| 1345.99 | 1357.55 | 1732.9917 | 1823.0827 | -0.395084935 | 0.010191 | 0.048114 | Gpr108        |
| 176.557 | 157.772 | 253.65091 | 297.5466  | -0.72022826  | 0.010202 | 0.048152 | Bahcc1        |
| 14.54   | 16.936  | 42.564707 | 58.533757 | -1.676863029 | 0.010242 | 0.048301 | Gm8250        |
| 1186.05 | 1460.06 | 1863.2918 | 1795.0352 | -0.46695366  | 0.010269 | 0.048396 | Chmp5         |
| 2536.19 | 2767.7  | 3368.6925 | 3526.6589 | -0.378243818 | 0.010275 | 0.048399 | Adipor2       |
| 136.053 | 134.597 | 214.56087 | 241.45175 | -0.751104551 | 0.010299 | 0.048499 | Rpl39-ps      |
| 162.017 | 181.839 | 257.99425 | 309.74113 | -0.72029347  | 0.010336 | 0.048643 | Tmem203       |
| 270.029 | 270.976 | 377.87036 | 454.85607 | -0.620136074 | 0.010353 | 0.048689 | Nat6          |
| 50.89   | 48.1339 | 99.028094 | 110.97025 | -1.083494553 | 0.010355 | 0.048689 | Ggn           |
| 12.4629 | 28.5238 | 51.251382 | 85.36173  | -1.723626339 | 0.010379 | 0.048772 | Kcnip2        |
| 603.411 | 703.29  | 916.44421 | 915.80941 | -0.4869881   | 0.010396 | 0.048839 | Snapi1        |
| 627.298 | 727.357 | 883.43484 | 1082.8745 | -0.535765255 | 0.010421 | 0.04893  | Gucd1         |
| 213.946 | 198.775 | 536.83651 | 264.62136 | -0.960945297 | 0.010428 | 0.048946 | Serpina3f     |

|         |         |           |           |              |          |          |               |
|---------|---------|-----------|-----------|--------------|----------|----------|---------------|
| 820.472 | 151.533 | 3256.6344 | 3170.5785 | -2.725437742 | 0.010434 | 0.048961 | Fcer1a        |
| 0       | 0       | 13.89868  | 6.0972664 | -5.82631707  | 0.010441 | 1        | Gm13431       |
| 988.721 | 935.937 | 1250.8812 | 1337.7402 | -0.427312584 | 0.010469 | 0.049099 | Adam15        |
| 2000.29 | 1658.84 | 2413.1583 | 2557.1935 | -0.44201823  | 0.010515 | 0.049276 | Prdx6         |
| 1217.21 | 1340.62 | 1566.2075 | 2235.2579 | -0.57048552  | 0.010527 | 0.049312 | Igbp1         |
| 825.665 | 836.995 | 1078.885  | 1177.9919 | -0.440075198 | 0.010534 | 0.04933  | Sos1          |
| 1279.52 | 1306.75 | 1692.1643 | 1699.9179 | -0.391192821 | 0.010602 | 0.049603 | Stx7          |
| 1.03857 | 0       | 19.979352 | 9.7556262 | -4.938880364 | 0.010633 | 0.049681 | Htra1         |
| 435.162 | 455.489 | 585.48189 | 736.54978 | -0.567729101 | 0.010649 | 0.049726 | Phldb1        |
| 11008.9 | 10753.5 | 13193.322 | 14593.197 | -0.352463916 | 0.010722 | 0.050048 | Rps29         |
| 575.369 | 672.092 | 877.35417 | 875.56746 | -0.490048363 | 0.010811 | 0.050392 | Hgsnat        |
| 283.53  | 207.689 | 359.62834 | 456.07553 | -0.731450015 | 0.010855 | 0.050555 | Hspa2         |
| 110.089 | 82.0059 | 216.29821 | 154.87057 | -0.956010294 | 0.010862 | 0.050572 | Gm4951        |
| 120.474 | 32.0893 | 187.63218 | 235.35448 | -1.475249827 | 0.010897 | 0.05072  | Ctsh          |
| 3.11572 | 2.67411 | 31.27203  | 13.413986 | -2.960612733 | 0.010927 | 0.050811 | Gm14548       |
| 406.082 | 56.1562 | 2048.318  | 1807.2298 | -3.060739705 | 0.010989 | 0.051044 | Hgf           |
| 701.036 | 823.625 | 1082.3597 | 1037.7547 | -0.475294543 | 0.011036 | 0.051236 | Slc17a9       |
| 4592.57 | 4280.35 | 5483.0292 | 5946.0542 | -0.365132626 | 0.011062 | 0.051325 | Cox8a         |
| 23.8872 | 46.3512 | 71.230735 | 123.16478 | -1.458242957 | 0.011091 | 0.051424 | Brdt          |
| 3269.43 | 3685.81 | 4332.0448 | 4861.9602 | -0.402178906 | 0.011093 | 0.051424 | Mapk8ip3      |
| 438.278 | 610.588 | 807.86077 | 782.88901 | -0.599839283 | 0.011117 | 0.051505 | Zfp579        |
| 48.8129 | 79.3318 | 125.95679 | 147.55385 | -1.087824989 | 0.011118 | 0.051715 | Mex3a         |
| 66.4686 | 59.7217 | 99.028094 | 186.57635 | -1.173739579 | 0.011218 | 0.051841 | Prr36         |
| 568.099 | 808.471 | 990.28094 | 1095.069  | -0.597751026 | 0.011238 | 0.051905 | Crebrf        |
| 0       | 0.89137 | 20.84802  | 8.536173  | -4.955376783 | 0.011289 | 0.052112 | Rab7b         |
| 56.0829 | 73.0922 | 96.422092 | 219.50159 | -1.283292978 | 0.011338 | 0.052259 | Tbx6          |
| 0       | 2.67411 | 9.5553424 | 31.705785 | -3.887811318 | 0.011365 | 0.052353 | Gzmg          |
| 1440.5  | 4212.61 | 10081.755 | 9509.2967 | -1.793007354 | 0.011368 | 0.052353 | Smox          |
| 30.1186 | 36.5461 | 71.230735 | 90.239543 | -1.270630844 | 0.011389 | 0.052435 | Gucal1a       |
| 109.05  | 99.8333 | 194.58152 | 173.16237 | -0.818513246 | 0.011437 | 0.052597 | Pip5k1b       |
| 764.389 | 879.781 | 1048.4817 | 1320.6679 | -0.525382834 | 0.011446 | 0.052623 | Dynlt3        |
| 6.23143 | 10.6964 | 52.12005  | 24.389066 | -2.175612144 | 0.011507 | 0.052874 | Sh3bgrl2      |
| 957.564 | 985.854 | 1241.3259 | 1374.3238 | -0.427739421 | 0.011543 | 0.053009 | Dnpep         |
| 48.8129 | 58.8303 | 97.290759 | 134.13986 | -1.098357237 | 0.011556 | 0.053055 | Sorbs3        |
| 489.168 | 505.406 | 649.76329 | 786.54737 | -0.528440898 | 0.011626 | 0.053319 | Atraid        |
| 0       | 0       | 5.212005  | 14.633439 | -5.801383298 | 0.011632 | 1        | Hoxa3         |
| 1223.44 | 1230.98 | 1779.8997 | 1529.1944 | -0.431863071 | 0.011652 | 0.053387 | Atp6v0d1      |
| 251.335 | 326.241 | 422.1724  | 482.9035  | -0.645333501 | 0.011775 | 0.053905 | Acot13        |
| 26536.6 | 24914.6 | 30950.623 | 35537.308 | -0.369849484 | 0.01178  | 0.053914 | Rpl28         |
| 63.3529 | 48.1339 | 112.05811 | 118.28697 | -1.04915194  | 0.011816 | 0.054032 | Prodh         |
| 77.8929 | 11.5878 | 161.57215 | 157.30947 | -1.84015892  | 0.01182  | 0.054034 | Zfp704        |
| 1158.01 | 1156.11 | 1573.1568 | 1479.1968 | -0.399892109 | 0.011837 | 0.054088 | Fam20b        |
| 21.81   | 48.1339 | 74.705405 | 120.72587 | -1.471894145 | 0.011841 | 0.054088 | C230085N15Rik |
| 6994.79 | 8494.74 | 9669.1379 | 11349.452 | -0.44015143  | 0.011845 | 0.054088 | Mapkapk2      |
| 1111.27 | 1268.42 | 1507.1381 | 1781.6212 | -0.465628053 | 0.011852 | 0.054095 | Zcchc7        |

|         |         |           |           |              |          |          |               |
|---------|---------|-----------|-----------|--------------|----------|----------|---------------|
| 1.03857 | 6.23958 | 24.32269  | 28.047425 | -2.81728825  | 0.011853 | 0.054095 | Elfn2         |
| 72.7001 | 95.3764 | 127.69412 | 231.69612 | -1.089928936 | 0.011952 | 0.054498 | Gm26510       |
| 1011.57 | 1229.2  | 1422.8774 | 1812.1076 | -0.528444022 | 0.011957 | 0.054498 | Rassf2        |
| 318.842 | 369.027 | 459.5251  | 614.60445 | -0.640032655 | 0.011959 | 0.054498 | Mb21d1        |
| 93.4715 | 17.8274 | 484.71646 | 270.71863 | -2.76540286  | 0.012014 | 0.054702 | Cxcr2         |
| 158.902 | 160.446 | 238.01489 | 286.57152 | -0.713602469 | 0.012053 | 0.054834 | Hspb11        |
| 91.3944 | 63.2872 | 140.72413 | 163.40674 | -0.976925837 | 0.012061 | 0.054857 | Tmem140       |
| 5393.31 | 5393.67 | 6659.205  | 6924.0557 | -0.332452782 | 0.012088 | 0.054932 | Tax1bp1       |
| 851.629 | 827.19  | 1369.02   | 1041.4131 | -0.523305659 | 0.012102 | 0.054966 | Bmp2k         |
| 850.591 | 1303.18 | 1749.4963 | 1549.9251 | -0.61495682  | 0.012128 | 0.055051 | Scn1b         |
| 1062.46 | 1124.02 | 1346.4346 | 1763.3294 | -0.506941422 | 0.012158 | 0.055171 | Mrpl30        |
| 542.135 | 596.326 | 798.30543 | 780.4501  | -0.471402945 | 0.012201 | 0.055338 | Cln6          |
| 809.048 | 861.954 | 1198.7611 | 1074.3383 | -0.444495817 | 0.012209 | 0.05536  | Tef           |
| 1870.47 | 2021.62 | 2401.8656 | 2796.2064 | -0.416713657 | 0.012227 | 0.055422 | Sra1          |
| 370.77  | 319.11  | 472.55512 | 565.82632 | -0.589099414 | 0.012255 | 0.055533 | Galns         |
| 1174.63 | 680.114 | 1484.5527 | 1503.5859 | -0.688837356 | 0.012276 | 0.055615 | Cmtm7         |
| 310.533 | 319.11  | 418.69773 | 557.29015 | -0.62971408  | 0.012288 | 0.055652 | Hyi           |
| 71.6615 | 68.6354 | 137.24946 | 129.26205 | -0.927092055 | 0.01232  | 0.055734 | Ago4          |
| 0       | 0.89137 | 19.979352 | 8.536173  | -4.911975908 | 0.012346 | 0.055839 | AC098716.1    |
| 282.492 | 352.091 | 430.85908 | 586.55703 | -0.677812572 | 0.012366 | 0.055911 | Hint3         |
| 268.99  | 311.088 | 343.99233 | 814.59479 | -0.995341112 | 0.01237  | 0.055913 | Chchd10       |
| 19945.8 | 18602   | 23640.786 | 24940.258 | -0.333736635 | 0.012523 | 0.056575 | Rpl10         |
| 4.15429 | 4.45684 | 41.69604  | 13.413986 | -2.686769026 | 0.012531 | 0.056593 | Illbos        |
| 5471.2  | 5208.27 | 6349.9594 | 8291.0629 | -0.454919891 | 0.012547 | 0.05665  | Prkch         |
| 934.715 | 1038.44 | 1233.5078 | 1553.5835 | -0.496854725 | 0.012575 | 0.056761 | Mtmr1         |
| 974.181 | 1050.03 | 1290.8399 | 1437.7354 | -0.429807436 | 0.012594 | 0.056822 | BC004004      |
| 99.703  | 113.204 | 156.36015 | 256.08519 | -0.948680347 | 0.012595 | 0.056822 | Gm5547        |
| 644.953 | 750.532 | 924.26221 | 1029.2186 | -0.483871811 | 0.012625 | 0.056914 | Rnf13         |
| 30675.3 | 30854.7 | 36290.322 | 46394.1   | -0.426271705 | 0.012626 | 0.056914 | Rpl3          |
| 0       | 0       | 8.6866749 | 9.7556262 | -5.702240794 | 0.012656 | 1        | Stra6l        |
| 0       | 0       | 8.6866749 | 9.7556262 | -5.702240794 | 0.012656 | 1        | Itih1         |
| 19.7329 | 16.936  | 41.69604  | 70.72829  | -1.611996113 | 0.012677 | 0.057112 | AL645745.1    |
| 147.477 | 232.647 | 327.48765 | 330.47184 | -0.788911207 | 0.012714 | 0.057243 | Slc1a4        |
| 397.773 | 411.812 | 600.24924 | 552.41234 | -0.510406967 | 0.012724 | 0.057275 | 1600012H06Rik |
| 426.853 | 460.838 | 594.16857 | 678.01602 | -0.517460415 | 0.012737 | 0.057301 | Snhg8         |
| 5.19286 | 11.5878 | 59.06939  | 21.950159 | -2.268711416 | 0.012771 | 0.057419 | Sh2d1b1       |
| 1057.27 | 848.583 | 1314.2939 | 1337.7402 | -0.477256171 | 0.012786 | 0.057455 | Ripor1        |
| 37.3886 | 49.0253 | 97.290759 | 92.678449 | -1.133989673 | 0.012835 | 0.057645 | Rell2         |
| 435.162 | 529.473 | 663.66197 | 737.76923 | -0.537033135 | 0.01285  | 0.057679 | Erlec1        |
| 34381.9 | 33492.3 | 40330.494 | 47685.501 | -0.374861846 | 0.012958 | 0.058115 | Rack1         |
| 823.588 | 781.73  | 1025.8963 | 1167.0168 | -0.4492536   | 0.012979 | 0.058195 | 0610030E20Rik |
| 372.847 | 1323.68 | 2978.6608 | 4411.982  | -2.122877468 | 0.013001 | 0.058277 | Neb           |
| 17.6557 | 17.8274 | 44.302042 | 60.972664 | -1.564413226 | 0.013062 | 0.058486 | Dock4         |
| 2540.35 | 2625.97 | 3112.4356 | 3851.0335 | -0.430086696 | 0.013102 | 0.058634 | Afg3l2        |
| 65.4301 | 141.728 | 220.64154 | 215.84323 | -1.071256428 | 0.013126 | 0.058723 | Gpat3         |

|         |         |           |           |              |          |          |          |
|---------|---------|-----------|-----------|--------------|----------|----------|----------|
| 43.62   | 49.9166 | 96.422092 | 101.21462 | -1.076926754 | 0.013154 | 0.058832 | Gm4285   |
| 2137.38 | 3107.31 | 5459.5752 | 3186.4314 | -0.721370993 | 0.013162 | 0.058851 | Stat2    |
| 96.5872 | 85.5714 | 158.09748 | 168.28455 | -0.841685473 | 0.013168 | 0.05886  | Ggnbp1   |
| 859.938 | 1092.82 | 1225.6898 | 1746.2571 | -0.604394902 | 0.013187 | 0.058914 | Nlrc3    |
| 40.5043 | 84.68   | 244.96423 | 95.117356 | -1.442392492 | 0.013217 | 0.058999 | Ifi206   |
| 1826.85 | 1965.47 | 2369.7249 | 2580.3631 | -0.383819083 | 0.013222 | 0.059007 | Cops4    |
| 638.722 | 780.839 | 913.8382  | 1177.9919 | -0.557443196 | 0.013229 | 0.059022 | Fcho2    |
| 1011.57 | 1226.52 | 1404.6353 | 1841.3745 | -0.535051833 | 0.013239 | 0.059048 | Pcmt2    |
| 692.728 | 943.959 | 1364.6766 | 1088.9718 | -0.584281678 | 0.013254 | 0.059082 | Ripk2    |
| 10.3857 | 16.0446 | 64.281395 | 31.705785 | -1.862107268 | 0.013263 | 0.059091 | Shroom4  |
| 1010.53 | 964.461 | 1178.7818 | 1886.4942 | -0.6330292   | 0.013293 | 0.059204 | Zkscan17 |
| 117.359 | 151.533 | 304.90229 | 193.89307 | -0.893542436 | 0.013312 | 0.059257 | Akr1c18  |
| 195.252 | 331.589 | 420.43507 | 493.87858 | -0.792320936 | 0.013321 | 0.059267 | Gm37881  |
| 233.679 | 515.211 | 610.67325 | 820.69206 | -0.932250644 | 0.013332 | 0.059299 | Tdrkh    |
| 358.307 | 292.369 | 669.74264 | 419.49193 | -0.746511851 | 0.013392 | 0.059533 | Naip2    |
| 9.34715 | 5.34821 | 29.534695 | 34.144692 | -2.123403469 | 0.013406 | 0.05958  | Mmp28    |
| 933.677 | 982.288 | 1253.4872 | 1285.3038 | -0.405660224 | 0.013419 | 0.059597 | Stx12    |
| 52.9672 | 110.53  | 160.70349 | 195.11252 | -1.115905647 | 0.01344  | 0.059663 | Gm28053  |
| 7.27001 | 0.89137 | 34.7467   | 21.950159 | -2.828771332 | 0.013518 | 0.059943 | Gm38345  |
| 16.6172 | 4.45684 | 31.27203  | 63.411571 | -2.176700236 | 0.013536 | 0.059997 | Rnase4   |
| 129.822 | 132.814 | 191.10685 | 271.93808 | -0.814151903 | 0.013553 | 0.060035 | Arl5c    |
| 534.865 | 921.675 | 1644.3876 | 957.27083 | -0.837122716 | 0.013621 | 0.060319 | Slfn8    |
| 287.685 | 249.583 | 350.073   | 559.72906 | -0.757644493 | 0.013639 | 0.060364 | Ajuba    |
| 2155.04 | 2377.28 | 2808.402  | 3148.6284 | -0.393760112 | 0.013677 | 0.060483 | Pcyt2    |
| 1.03857 | 29.4152 | 300.55895 | 242.6712  | -4.152297828 | 0.013691 | 0.060531 | Peg10    |
| 1249.4  | 1589.31 | 2433.1377 | 1766.9878 | -0.565599837 | 0.013788 | 0.060899 | Irgm2    |
| 26922.9 | 26800.8 | 31807.998 | 37878.658 | -0.375268158 | 0.013807 | 0.060957 | Rps4x    |
| 9.34715 | 10.6964 | 29.534695 | 46.339225 | -1.912466548 | 0.013854 | 0.061135 | Ttc21a   |
| 35.3115 | 16.0446 | 69.4934   | 74.38665  | -1.49381696  | 0.013932 | 0.061459 | Rab13    |
| 1887.09 | 1663.29 | 2132.5787 | 3024.2441 | -0.537932134 | 0.013946 | 0.061504 | Samsn1   |
| 6.23143 | 8.91369 | 26.928692 | 37.803052 | -2.084923196 | 0.013964 | 0.061565 | Klk10    |
| 199.406 | 177.382 | 260.60025 | 373.1527  | -0.747627706 | 0.014008 | 0.061745 | Gm5805   |
| 0       | 0       | 2.6060025 | 18.291799 | -5.873361149 | 0.014033 | 1        | Gjb1     |
| 3557.11 | 3798.12 | 5218.9543 | 4436.371  | -0.392823098 | 0.014107 | 0.06213  | Capza2   |
| 76.8544 | 129.248 | 230.19689 | 174.38182 | -0.972036787 | 0.014145 | 0.062213 | Pctp     |
| 164.094 | 194.318 | 236.27756 | 432.90591 | -0.896477958 | 0.014168 | 0.062279 | Etfbkmt  |
| 0       | 0       | 12.161345 | 6.0972664 | -5.694352718 | 0.014275 | 1        | Clec4a3  |
| 32.1957 | 41.8943 | 87.735417 | 80.483917 | -1.181077674 | 0.014507 | 0.063663 | Camk2n1  |
| 6.23143 | 13.3705 | 37.352702 | 39.022505 | -1.950141021 | 0.014519 | 0.0637   | Ctla2b   |
| 1137.24 | 1201.56 | 1486.2901 | 1590.1671 | -0.39485688  | 0.01453  | 0.063731 | Itfg1    |
| 203.56  | 496.492 | 641.94528 | 718.25798 | -0.956296549 | 0.014615 | 0.063981 | Abcg1    |
| 2060.53 | 2017.17 | 2438.3497 | 3175.4563 | -0.460563893 | 0.014696 | 0.064265 | Mlxip    |
| 993.914 | 919.001 | 1218.7405 | 1345.057  | -0.422129124 | 0.014732 | 0.064408 | Neu1     |
| 342.729 | 432.314 | 719.25669 | 506.07311 | -0.661984222 | 0.014847 | 0.064835 | L1cam    |
| 3341.09 | 3421.96 | 4246.0467 | 4261.9892 | -0.331097039 | 0.014857 | 0.064848 | Zc3h7a   |

|         |         |           |           |              |          |          |               |
|---------|---------|-----------|-----------|--------------|----------|----------|---------------|
| 453.856 | 159.555 | 701.01467 | 579.24031 | -1.063718656 | 0.014896 | 0.065002 | Akr1c13       |
| 119.436 | 107.856 | 161.57215 | 269.49918 | -0.919636388 | 0.01491  | 0.065025 | 5830432E09Rik |
| 7.27001 | 4.45684 | 19.110685 | 40.241958 | -2.340027697 | 0.014921 | 0.065057 | Acox1         |
| 41227.2 | 39285.3 | 47483.971 | 57882.569 | -0.388099402 | 0.014968 | 0.065213 | Rpl13         |
| 213.946 | 404.681 | 692.32799 | 454.85607 | -0.890760834 | 0.014969 | 0.065213 | Slfn5         |
| 67.5072 | 46.3512 | 130.30012 | 106.09244 | -1.060102764 | 0.014976 | 0.065227 | Map3k6        |
| 19.7329 | 7.13095 | 99.896762 | 23.169612 | -2.21139925  | 0.014997 | 0.065282 | Ctca3a1       |
| 1499.7  | 1387.86 | 1788.5864 | 2049.901  | -0.410234712 | 0.015007 | 0.06531  | Rpl6l         |
| 1690.8  | 1669.53 | 2062.2166 | 2337.6919 | -0.388313095 | 0.015038 | 0.065414 | Erp44         |
| 1469.58 | 1475.22 | 2095.226  | 1802.3519 | -0.405130558 | 0.015325 | 0.066547 | Elac2         |
| 0       | 0       | 7.8180075 | 9.7556262 | -5.631722715 | 0.015337 | 1        | Klk12         |
| 7.27001 | 4.45684 | 70.362067 | 8.536173  | -2.765423969 | 0.015354 | 0.06664  | Gp9           |
| 1299.25 | 1187.3  | 1446.3314 | 2469.3929 | -0.654270556 | 0.015361 | 0.066653 | St8sia1       |
| 0       | 1.78274 | 16.504682 | 13.413986 | -4.008940336 | 0.01538  | 0.066713 | AC115037.1    |
| 200.444 | 132.814 | 291.00361 | 276.81589 | -0.77185939  | 0.015415 | 0.066803 | Pgm21l        |
| 12.4629 | 16.0446 | 31.27203  | 68.289384 | -1.79305295  | 0.015421 | 0.066803 | Gpx7          |
| 559.791 | 528.582 | 715.78202 | 787.76682 | -0.465593527 | 0.015442 | 0.066854 | Hspa13        |
| 2977.59 | 2941.52 | 3642.3228 | 3847.3751 | -0.339355445 | 0.015459 | 0.066898 | Dpp8          |
| 1.03857 | 4.45684 | 19.979352 | 21.950159 | -2.902768959 | 0.015476 | 0.066953 | Figln2        |
| 39.4658 | 8.91369 | 92.078754 | 73.167197 | -1.78376616  | 0.015486 | 0.066976 | Npr2          |
| 3.11572 | 0       | 26.060025 | 12.194533 | -3.675081046 | 0.015523 | 0.06708  | Gm15922       |
| 363.5   | 364.57  | 648.89462 | 464.6117  | -0.615388559 | 0.015601 | 0.067365 | Gm10925       |
| 709.345 | 805.797 | 968.56426 | 1135.311  | -0.472062688 | 0.015609 | 0.067384 | Syap1         |
| 37164.3 | 35599.5 | 43966.737 | 46464.828 | -0.313595149 | 0.015632 | 0.067462 | Rpl41         |
| 152.67  | 206.798 | 622.83459 | 199.99034 | -1.196687181 | 0.015639 | 0.067478 | Cmpk2         |
| 15.5786 | 24.067  | 76.44274  | 42.680865 | -1.58834499  | 0.015652 | 0.067516 | Gm15663       |
| 14346.8 | 13872.4 | 17001.56  | 18250.338 | -0.320978332 | 0.015657 | 0.067517 | Rps10         |
| 1135.16 | 1509.09 | 1909.3312 | 1797.4741 | -0.48695245  | 0.015673 | 0.06757  | Vamp2         |
| 21146.4 | 20418.6 | 24461.677 | 29900.994 | -0.38718058  | 0.015678 | 0.067573 | Rps23         |
| 1908.9  | 426.074 | 6784.2931 | 4710.748  | -2.29968891  | 0.015691 | 0.067592 | Alox5         |
| 69.5844 | 92.7023 | 138.9868  | 167.0651  | -0.910302345 | 0.015826 | 0.068065 | Mcoln2        |
| 0       | 0       | 149.41081 | 4.8778131 | -8.768273085 | 0.01587  | 0.068192 | S100a8        |
| 25.9643 | 17.8274 | 52.12005  | 67.06993  | -1.446049095 | 0.01587  | 0.068192 | Bfsp2         |
| 2.07714 | 0.89137 | 11.292677 | 20.730706 | -3.447320135 | 0.015873 | 0.068192 | Gm26226       |
| 55.0443 | 47.2425 | 88.604084 | 129.26205 | -1.087692862 | 0.015884 | 0.068222 | Tlr6          |
| 4780.55 | 4704.64 | 5881.7476 | 5950.932  | -0.319019429 | 0.015907 | 0.068267 | Grb2          |
| 60.2372 | 81.1145 | 130.30012 | 141.45658 | -0.939016796 | 0.015921 | 0.068292 | 5730409E04Rik |
| 2862.31 | 2622.41 | 3352.1879 | 3772.9885 | -0.377296189 | 0.015957 | 0.068393 | Parvg         |
| 6.23143 | 1.78274 | 35.615367 | 15.852893 | -2.711599487 | 0.015981 | 0.068448 | Drc7          |
| 1085.31 | 1195.33 | 1430.6954 | 1623.0923 | -0.420140578 | 0.015989 | 0.068453 | Fam46c        |
| 766.466 | 1035.77 | 1250.0125 | 1326.7652 | -0.514717007 | 0.01615  | 0.069033 | Ctps2         |
| 970.027 | 2256.05 | 4910.5773 | 3859.5696 | -1.442708284 | 0.016156 | 0.069033 | Upp1          |
| 2139.46 | 2745.42 | 3112.4356 | 3646.1653 | -0.467781007 | 0.016158 | 0.069033 | Evl           |
| 709.345 | 131.031 | 2334.1096 | 2638.8969 | -2.56531956  | 0.016158 | 0.069033 | Ms4a2         |
| 245.103 | 294.152 | 377.87036 | 445.10045 | -0.607053237 | 0.016171 | 0.069034 | Glt8d1        |



|         |         |           |           |              |          |          |               |
|---------|---------|-----------|-----------|--------------|----------|----------|---------------|
| 0       | 0       | 1.737335  | 19.511252 | -5.897210233 | 0.016174 | 1        | Gm43181       |
| 11.4243 | 11.5878 | 79.91741  | 19.511252 | -2.120063555 | 0.016194 | 0.069113 | Cdhr4         |
| 631.452 | 481.339 | 944.24157 | 729.23306 | -0.590893061 | 0.016198 | 0.069113 | Dock5         |
| 966.911 | 1002.79 | 1268.2545 | 1317.0095 | -0.391891365 | 0.016206 | 0.069129 | Cnpy2         |
| 7.27001 | 16.0446 | 26.928692 | 68.289384 | -2.013181494 | 0.016258 | 0.069257 | H2-Q2         |
| 328.189 | 418.052 | 491.6658  | 679.23548 | -0.646920169 | 0.016278 | 0.069302 | Fbxl12        |
| 856.822 | 910.087 | 1095.3897 | 1341.3986 | -0.462363051 | 0.016281 | 0.069302 | Traf3ip2      |
| 1136.2  | 1295.16 | 1561.8642 | 1668.2121 | -0.409027195 | 0.016335 | 0.069477 | Fbxo18        |
| 1491.39 | 1316.55 | 1991.8546 | 1754.7933 | -0.417003287 | 0.016347 | 0.069506 | Cux1          |
| 567.061 | 518.777 | 770.50807 | 723.1358  | -0.461126871 | 0.016351 | 0.069506 | Lpin2         |
| 510.978 | 459.055 | 801.7801  | 617.04336 | -0.550898419 | 0.016399 | 0.069692 | Pla2g15       |
| 762.312 | 683.68  | 915.57554 | 1093.8496 | -0.473946957 | 0.016654 | 0.070647 | Ldlrap1       |
| 1.03857 | 17.8274 | 98.159427 | 24.389066 | -2.688671466 | 0.016669 | 0.070689 | AC165164.2    |
| 804.894 | 938.611 | 1115.3691 | 1284.0843 | -0.459347254 | 0.016696 | 0.070751 | Rab11fip1     |
| 3571.65 | 3595.78 | 4292.9548 | 4935.1274 | -0.364222029 | 0.016699 | 0.070751 | Sec31a        |
| 0       | 0       | 2.6060025 | 17.072346 | -5.786581347 | 0.016703 | 1        | Agbl2         |
| 231.602 | 311.979 | 456.9191  | 392.66396 | -0.64394303  | 0.016743 | 0.07088  | Slc35a5       |
| 1449.85 | 1756.89 | 2057.8733 | 2262.0858 | -0.429145026 | 0.016765 | 0.070949 | Gpr107        |
| 0       | 0.89137 | 8.6866749 | 17.072346 | -4.751367983 | 0.016789 | 1        | Dnah2         |
| 5945.83 | 8155.13 | 8860.4084 | 11320.185 | -0.51693441  | 0.016811 | 0.071088 | Cd2           |
| 9.34715 | 10.6964 | 39.958705 | 31.705785 | -1.839109394 | 0.016862 | 0.071262 | Fkbp1b        |
| 216.023 | 222.842 | 299.69029 | 389.0056  | -0.647116704 | 0.016904 | 0.071407 | 9330136K24Rik |
| 4030.7  | 5385.65 | 8041.255  | 5742.4055 | -0.54983307  | 0.016909 | 0.071409 | Clic4         |
| 6992.71 | 7018.64 | 9299.9542 | 8373.9857 | -0.335184083 | 0.016917 | 0.071424 | Hcls1         |
| 453.856 | 594.543 | 636.73327 | 1134.0916 | -0.753980343 | 0.016943 | 0.071516 | Pik3ip1       |
| 60.2372 | 86.4628 | 151.14814 | 131.70095 | -0.945565437 | 0.017084 | 0.071988 | Fam217b       |
| 241.987 | 264.736 | 412.61706 | 349.98309 | -0.590978965 | 0.017087 | 0.071988 | Gm26809       |
| 628.336 | 535.713 | 740.10471 | 949.95411 | -0.536972795 | 0.017186 | 0.072311 | Oxr1          |
| 11835.6 | 11406.8 | 13739.714 | 16068.736 | -0.358855104 | 0.017194 | 0.07233  | Rps13         |
| 84.1244 | 135.488 | 244.96423 | 174.38182 | -0.933020506 | 0.017213 | 0.072356 | Gm43822       |
| 390.503 | 398.442 | 515.11982 | 621.92117 | -0.525358735 | 0.017244 | 0.072415 | Lamb3         |
| 116.32  | 115.878 | 192.84418 | 192.67362 | -0.731492421 | 0.017246 | 0.072415 | Vash1         |
| 8285.73 | 8475.13 | 9787.2767 | 12645.731 | -0.420325084 | 0.017294 | 0.072579 | Naca          |
| 11.4243 | 0.89137 | 26.928692 | 48.778131 | -2.63923906  | 0.017312 | 0.072615 | Gm43489       |
| 9.34715 | 5.34821 | 19.979352 | 47.558678 | -2.20037171  | 0.017318 | 0.072624 | Cyp2d22       |
| 14453.8 | 15406.4 | 18083.051 | 19158.83  | -0.318629015 | 0.017366 | 0.072787 | 9-Sep         |
| 461.126 | 453.707 | 588.95656 | 713.38017 | -0.507891191 | 0.017411 | 0.072957 | Tbc1d23       |
| 283.53  | 338.72  | 375.26436 | 740.20814 | -0.839075534 | 0.017434 | 0.073013 | Carns1        |
| 44.6586 | 49.9166 | 80.786077 | 125.60369 | -1.119449399 | 0.017492 | 0.073206 | Gpr157        |
| 808.009 | 1280.01 | 1354.2526 | 2018.1952 | -0.690368391 | 0.017494 | 0.073206 | Rpl7a-ps5     |
| 1947.32 | 2605.47 | 3406.9139 | 2952.2964 | -0.482044004 | 0.017552 | 0.073395 | Slc4a11       |
| 322.996 | 241.561 | 522.93783 | 382.90833 | -0.685667256 | 0.017552 | 0.073395 | Ftl1-ps1      |
| 656.378 | 599     | 789.61875 | 984.0988  | -0.497520509 | 0.017566 | 0.073433 | Nudt18        |
| 1.03857 | 7.13095 | 49.514047 | 12.194533 | -2.901943521 | 0.017581 | 0.073442 | Ifi213        |
| 1525.66 | 1983.3  | 3019.4882 | 2145.0183 | -0.55791814  | 0.017584 | 0.073442 | Trim12c       |

|         |         |           |           |              |          |          |               |
|---------|---------|-----------|-----------|--------------|----------|----------|---------------|
| 90.3558 | 62.3958 | 165.91549 | 129.26205 | -0.956379511 | 0.017591 | 0.073442 | E330020D12Rik |
| 42.5815 | 51.6994 | 86.866749 | 112.1897  | -1.072546247 | 0.017591 | 0.073442 | Lppos         |
| 975.22  | 1458.28 | 1621.8022 | 2047.4621 | -0.591342965 | 0.017671 | 0.073663 | AC126459.2    |
| 1198.51 | 1340.62 | 1637.4382 | 1686.5039 | -0.388023878 | 0.017814 | 0.07411  | Pbx2          |
| 1875.66 | 1964.58 | 2276.7775 | 2999.8551 | -0.457614541 | 0.017815 | 0.07411  | 7-Mar         |
| 871.362 | 340.503 | 2920.4601 | 1485.2941 | -1.862545967 | 0.017826 | 0.074134 | Ly6c2         |
| 1.03857 | 0.89137 | 6.94934   | 21.950159 | -3.898198563 | 0.017838 | 0.074167 | Gm3248        |
| 37.3886 | 90.9196 | 165.91549 | 131.70095 | -1.210141561 | 0.017853 | 0.07421  | Bmf           |
| 12.4629 | 6.23958 | 46.908045 | 26.827972 | -1.995336722 | 0.017879 | 0.074298 | Gm33280       |
| 988.721 | 889.586 | 1433.3014 | 1158.4806 | -0.465949003 | 0.017888 | 0.074317 | Cebpb         |
| 14.54   | 1.78274 | 317.9323  | 23.169612 | -4.392020492 | 0.017933 | 0.074447 | Mmp12         |
| 2.07714 | 0.89137 | 7.8180075 | 25.608519 | -3.503995543 | 0.018014 | 0.074706 | Dnah1         |
| 9.34715 | 13.3705 | 34.7467   | 42.680865 | -1.760637823 | 0.018095 | 0.07496  | Gm45515       |
| 1412.46 | 1400.34 | 1669.5789 | 2276.7193 | -0.487540252 | 0.018116 | 0.074995 | H2-T-ps       |
| 108.012 | 138.162 | 192.84418 | 228.03776 | -0.769696283 | 0.01815  | 0.075114 | Pter          |
| 4.15429 | 3.56547 | 12.161345 | 36.583598 | -2.651110391 | 0.018163 | 0.07515  | Gm12596       |
| 1389.61 | 1413.71 | 1747.759  | 1864.5441 | -0.365329988 | 0.0182   | 0.075284 | Polr1c        |
| 1301.33 | 1410.15 | 1640.0442 | 2059.6566 | -0.447244512 | 0.018249 | 0.075426 | Cars          |
| 1067.65 | 873.541 | 1255.2245 | 1412.1269 | -0.458444703 | 0.018376 | 0.075796 | Itp2          |
| 7560.81 | 9971.74 | 13035.224 | 11045.808 | -0.457865762 | 0.018378 | 0.075796 | Anxa2         |
| 16.6172 | 9.80506 | 47.776712 | 37.803052 | -1.706102897 | 0.018392 | 0.075796 | Hecw2         |
| 365.577 | 54.3735 | 1932.7852 | 1117.0192 | -2.861016723 | 0.018394 | 0.075796 | Tyrobp        |
| 1233.82 | 1257.72 | 1423.746  | 2459.6373 | -0.639262667 | 0.018421 | 0.075826 | Mib2          |
| 3422.1  | 3694.72 | 4493.617  | 4461.9796 | -0.331458115 | 0.018466 | 0.075937 | Kidins220     |
| 9.34715 | 16.936  | 62.54406  | 30.486332 | -1.823261027 | 0.01848  | 0.075974 | Gm43197       |
| 1747.92 | 1633.88 | 1974.4812 | 2929.1268 | -0.535326801 | 0.018515 | 0.076066 | Spint2        |
| 473.589 | 451.924 | 594.16857 | 719.47744 | -0.503800443 | 0.018533 | 0.076095 | Rint1         |
| 5132.62 | 5223.42 | 6138.0045 | 7136.2406 | -0.357882079 | 0.018584 | 0.076274 | Zmiz1         |
| 56.0829 | 63.2872 | 83.39208  | 197.55143 | -1.228223846 | 0.018586 | 0.076274 | Tmem221       |
| 0       | 0       | 3.47467   | 14.633439 | -5.667461475 | 0.018692 | 1        | Scd3          |
| 2.07714 | 1.78274 | 19.110685 | 13.413986 | -3.083387586 | 0.018729 | 0.076801 | 5730460C07Rik |
| 555.636 | 489.361 | 702.752   | 738.98869 | -0.464516837 | 0.018747 | 0.076855 | Ufsp2         |
| 3118.83 | 3174.16 | 3729.1896 | 4515.6355 | -0.389273992 | 0.018754 | 0.076865 | Rpl21-ps15    |
| 721.808 | 868.193 | 1022.4216 | 1185.3086 | -0.47202891  | 0.018825 | 0.077058 | Mid1ip1       |
| 1.03857 | 1.78274 | 17.37335  | 12.194533 | -3.37885206  | 0.018859 | 0.077178 | AC238811.2    |
| 2137.38 | 2014.49 | 2351.4829 | 3994.9289 | -0.611589748 | 0.018898 | 0.077317 | Slc39a10      |
| 3572.69 | 3520.91 | 4269.5007 | 4694.8951 | -0.337441079 | 0.018931 | 0.077432 | Park7         |
| 449.702 | 443.902 | 552.47253 | 801.18081 | -0.59696465  | 0.018943 | 0.077444 | Mettl26       |
| 1883.97 | 1895.05 | 2480.9144 | 2326.7169 | -0.347619848 | 0.018943 | 0.077444 | Bnip2         |
| 2185.16 | 1937.84 | 2725.8786 | 2593.7771 | -0.36810228  | 0.018961 | 0.077496 | Lamp2         |
| 3.11572 | 0       | 15.636015 | 19.511252 | -3.545477202 | 0.019098 | 0.077979 | AI661453      |
| 412.313 | 97.1592 | 1315.1626 | 1054.8271 | -2.218458006 | 0.01913  | 0.07807  | Fes           |
| 8730.24 | 13480.2 | 15613.43  | 16391.891 | -0.526976266 | 0.01914  | 0.07807  | Il2rb         |
| 106.973 | 106.073 | 191.10685 | 168.28455 | -0.756315279 | 0.01915  | 0.078093 | Otub2         |
| 169.287 | 206.798 | 425.64707 | 242.6712  | -0.832029526 | 0.019163 | 0.078107 | Tnfrsf23      |

|         |         |           |           |              |          |          |            |
|---------|---------|-----------|-----------|--------------|----------|----------|------------|
| 1.03857 | 7.13095 | 35.615367 | 18.291799 | -2.702042215 | 0.019164 | 0.078107 | Snhg11     |
| 5.19286 | 6.23958 | 32.140697 | 20.730706 | -2.211556558 | 0.019187 | 0.078183 | Mcpt4      |
| 760.235 | 830.756 | 1129.2677 | 1008.4879 | -0.426647562 | 0.019221 | 0.078244 | Dhrs1      |
| 1825.81 | 4681.47 | 9070.626  | 9093.4631 | -1.480889957 | 0.019266 | 0.078407 | Myo10      |
| 28.0415 | 16.936  | 149.41081 | 25.608519 | -1.969779465 | 0.019291 | 0.078467 | Atp8b5     |
| 13642.7 | 12853.5 | 15686.398 | 17935.719 | -0.343549745 | 0.019334 | 0.078584 | Rps11      |
| 1272.25 | 1736.39 | 2018.7833 | 2196.2354 | -0.48566109  | 0.019385 | 0.078732 | Chst11     |
| 55.0443 | 16.936  | 109.4521  | 90.239543 | -1.481241263 | 0.019431 | 0.078867 | Tfr2       |
| 13.5014 | 10.6964 | 116.40144 | 10.97508  | -2.404876981 | 0.019437 | 0.078867 | Mpl        |
| 268.99  | 215.711 | 404.79905 | 340.22747 | -0.623331842 | 0.019438 | 0.078867 | Nedd4l     |
| 1713.64 | 1862.07 | 2612.0832 | 2151.1156 | -0.414219922 | 0.019444 | 0.078873 | Degs1      |
| 261.72  | 262.062 | 377.00169 | 384.12778 | -0.538915656 | 0.01949  | 0.079    | Gm10177    |
| 19.7329 | 28.5238 | 89.472752 | 45.119771 | -1.482702048 | 0.019496 | 0.079003 | Tpbgl      |
| 13.5014 | 15.1533 | 33.009365 | 58.533757 | -1.667109211 | 0.019506 | 0.079017 | Shd        |
| 45.6972 | 58.8303 | 163.30949 | 78.04501  | -1.211293887 | 0.019509 | 0.079017 | Cdkn2b     |
| 5334.11 | 5957.91 | 8082.0824 | 6717.9681 | -0.390456714 | 0.019547 | 0.079089 | Igtp       |
| 38.4272 | 37.4375 | 93.816089 | 71.947744 | -1.131700115 | 0.019601 | 0.079289 | Pkd112     |
| 1793.61 | 1725.69 | 2175.1434 | 2314.5223 | -0.351101666 | 0.019666 | 0.079494 | Man2b2     |
| 9063.62 | 9963.72 | 11337.848 | 13039.614 | -0.357298758 | 0.019693 | 0.07958  | Mllt6      |
| 94.5101 | 150.641 | 218.03554 | 218.28214 | -0.828516201 | 0.0197   | 0.079589 | Gm43980    |
| 694.805 | 762.12  | 1064.1177 | 918.24832 | -0.444995347 | 0.019739 | 0.0797   | Flt3l      |
| 4.15429 | 1.78274 | 13.030012 | 28.047425 | -2.799818648 | 0.019742 | 0.0797   | Gm4349     |
| 523.44  | 1028.64 | 1042.401  | 1724.3069 | -0.832505707 | 0.019761 | 0.079738 | Tnip3      |
| 75.8158 | 103.399 | 308.37696 | 109.7508  | -1.22531853  | 0.019796 | 0.079822 | Src        |
| 585.755 | 691.702 | 859.11215 | 891.42035 | -0.453473369 | 0.019822 | 0.079901 | Phf20      |
| 279.376 | 313.762 | 410.87973 | 452.41717 | -0.53958559  | 0.019854 | 0.080011 | Slc25a45   |
| 1961.86 | 2080.45 | 2449.6423 | 2777.9146 | -0.370325973 | 0.019908 | 0.080149 | Aup1       |
| 3225.81 | 3149.21 | 4026.2738 | 3929.0785 | -0.31962807  | 0.019924 | 0.080175 | Chp1       |
| 412.313 | 373.483 | 541.17985 | 558.5096  | -0.485147672 | 0.019953 | 0.080251 | Casp9      |
| 33.2343 | 41.8943 | 61.675392 | 123.16478 | -1.290229781 | 0.020023 | 0.080463 | Gm26724    |
| 508.9   | 313.762 | 646.28862 | 651.18805 | -0.658872162 | 0.020094 | 0.08066  | Pdim7      |
| 1327.3  | 1089.25 | 1786.849  | 1519.4388 | -0.453416343 | 0.020094 | 0.08066  | Itga6      |
| 19346.5 | 20677.1 | 23174.311 | 30209.516 | -0.415459113 | 0.020247 | 0.081168 | Srrm2      |
| 6.23143 | 5.34821 | 50.382715 | 12.194533 | -2.446833611 | 0.02026  | 0.081203 | Tie1       |
| 35.3115 | 38.3289 | 73.836737 | 86.581183 | -1.11988814  | 0.020327 | 0.081449 | Zfp583     |
| 96.5872 | 322.675 | 819.15345 | 714.59962 | -1.870344228 | 0.020342 | 0.081488 | AL589871.2 |
| 2.07714 | 0.89137 | 17.37335  | 12.194533 | -3.343061269 | 0.020356 | 0.081507 | Zfp105     |
| 26818   | 25806.9 | 31001.874 | 35067.818 | -0.328201614 | 0.020394 | 0.081617 | Rps8       |
| 583.678 | 754.989 | 861.71815 | 1086.5329 | -0.539447617 | 0.020464 | 0.081835 | Ankzfl     |
| 1587.98 | 329.806 | 6353.4341 | 3609.5817 | -2.377316539 | 0.020482 | 0.081887 | Emilin2    |
| 33.2343 | 8.91369 | 66.887397 | 68.289384 | -1.691976754 | 0.020505 | 0.081959 | Phka1      |
| 490.206 | 578.498 | 839.1328  | 684.11329 | -0.512045059 | 0.02056  | 0.08216  | Oraov1     |
| 756.081 | 717.552 | 942.50423 | 1017.024  | -0.410721614 | 0.020579 | 0.082216 | Soat1      |
| 3.11572 | 6.23958 | 14.767347 | 37.803052 | -2.469330654 | 0.020619 | 0.082315 | Efhc1      |
| 235.756 | 189.862 | 415.22306 | 282.91316 | -0.718105976 | 0.020676 | 0.082494 | Daaml      |

|         |         |           |           |              |          |          |               |
|---------|---------|-----------|-----------|--------------|----------|----------|---------------|
| 3961.12 | 4704.64 | 6647.0437 | 5158.2874 | -0.446225755 | 0.020761 | 0.082756 | Klf6          |
| 5594.79 | 6598.8  | 8486.0128 | 7422.8121 | -0.383756761 | 0.020829 | 0.082947 | Pstpip1       |
| 590.948 | 541.952 | 717.51935 | 857.27566 | -0.474115705 | 0.020837 | 0.082956 | Faap100       |
| 177.596 | 218.385 | 290.13494 | 324.37457 | -0.631195847 | 0.021029 | 0.083557 | Slc35f5       |
| 76.8544 | 43.6771 | 179.81417 | 93.897903 | -1.191580691 | 0.021097 | 0.083725 | Ppm1e         |
| 2360.68 | 2252.49 | 2647.6985 | 3975.4177 | -0.521171967 | 0.021112 | 0.083764 | Rel           |
| 40.5043 | 48.1339 | 76.44274  | 115.84806 | -1.110419527 | 0.021168 | 0.083922 | Snora31       |
| 1239.02 | 1491.26 | 1667.8416 | 2126.7265 | -0.473737872 | 0.021175 | 0.083929 | Pank3         |
| 232.64  | 287.021 | 370.05235 | 409.7363  | -0.583057395 | 0.021282 | 0.08429  | Gnal          |
| 16.6172 | 8.02232 | 51.251382 | 32.925239 | -1.786998468 | 0.021327 | 0.084429 | Cx3cl1        |
| 38.4272 | 81.1145 | 104.2401  | 171.94291 | -1.199858632 | 0.021347 | 0.08447  | Gm36931       |
| 2.07714 | 0       | 21.716687 | 8.536173  | -3.930633591 | 0.021359 | 0.084491 | Serpinb8      |
| 1524.62 | 1347.75 | 1775.5564 | 2007.2201 | -0.396943536 | 0.021373 | 0.08452  | Pip4k2a       |
| 4.15429 | 7.13095 | 61.675392 | 8.536173  | -2.639867229 | 0.021376 | 0.08452  | Trpc6         |
| 2064.68 | 3257.06 | 5223.2976 | 3248.6235 | -0.670913322 | 0.021451 | 0.084711 | Ifi2712a      |
| 3.11572 | 5.34821 | 26.928692 | 18.291799 | -2.411848464 | 0.021457 | 0.084715 | Nlrc4         |
| 173.442 | 221.059 | 264.07492 | 399.98068 | -0.746875328 | 0.02147  | 0.084717 | Fam19a3       |
| 252.373 | 205.015 | 343.99233 | 345.10528 | -0.592729573 | 0.021631 | 0.085192 | Gm4149        |
| 52.9672 | 54.3735 | 152.01681 | 80.483917 | -1.120869529 | 0.021689 | 0.085399 | Shank1        |
| 2123.88 | 2142.85 | 2517.3984 | 3146.1895 | -0.407914818 | 0.021719 | 0.0855   | Arhgap27      |
| 4163.64 | 4140.41 | 4893.204  | 5748.5028 | -0.35752156  | 0.021776 | 0.085702 | Setd5         |
| 6319.71 | 6746.77 | 7537.4279 | 10155.607 | -0.437037676 | 0.021833 | 0.085862 | Cd3d          |
| 3685.89 | 5029.1  | 5991.1997 | 5874.1065 | -0.444993744 | 0.021849 | 0.085905 | Acsl4         |
| 8762.44 | 9746.23 | 11166.721 | 12165.266 | -0.333957944 | 0.021895 | 0.086066 | Dgka          |
| 22.8486 | 6.23958 | 295.34695 | 31.705785 | -3.495800667 | 0.021986 | 0.086379 | Hp            |
| 10.3857 | 7.13095 | 39.958705 | 25.608519 | -1.915916647 | 0.022102 | 0.086711 | Rufy4         |
| 864.092 | 816.494 | 1039.795  | 1212.1366 | -0.421353701 | 0.022177 | 0.086919 | Lamtor2       |
| 1027.15 | 1128.47 | 1443.7254 | 1365.7877 | -0.382248082 | 0.022219 | 0.087064 | Pex5          |
| 29.08   | 50.808  | 66.01873  | 135.35931 | -1.323929528 | 0.022243 | 0.087137 | 1700001O22Rik |
| 498.515 | 545.518 | 641.07661 | 888.98144 | -0.549140475 | 0.022292 | 0.087307 | Gngt2         |
| 3990.2  | 4252.72 | 5065.2002 | 5193.6515 | -0.315485842 | 0.02232  | 0.087396 | Cyp51         |
| 317.803 | 330.698 | 414.3544  | 554.85124 | -0.576974989 | 0.022334 | 0.087429 | Tmem87b       |
| 0       | 0       | 4.3433375 | 12.194533 | -5.538246703 | 0.022342 | 1        | Gm37824       |
| 0       | 0       | 4.3433375 | 12.194533 | -5.538246703 | 0.022342 | 1        | Gm13387       |
| 5281.14 | 7743.32 | 8552.9002 | 9865.377  | -0.499695651 | 0.022365 | 0.087486 | Nfat5         |
| 1725.07 | 1838.89 | 2203.8094 | 2327.9363 | -0.346136148 | 0.022566 | 0.088145 | Sugt1         |
| 392.58  | 457.272 | 547.26052 | 681.67438 | -0.529639014 | 0.022591 | 0.0882   | Trim16        |
| 967.949 | 971.592 | 1186.5998 | 1386.5184 | -0.406783166 | 0.022633 | 0.088308 | Acads         |
| 24.9257 | 23.1756 | 67.756065 | 51.217038 | -1.311416386 | 0.022635 | 0.088308 | Upk1a         |
| 19.7329 | 24.9583 | 59.06939  | 53.655944 | -1.333033979 | 0.022818 | 0.088889 | AC117769.1    |
| 7.27001 | 6.23958 | 33.878032 | 21.950159 | -2.055393116 | 0.022823 | 0.088889 | A430105I19Rik |
| 7.27001 | 11.5878 | 24.32269  | 47.558678 | -1.91613647  | 0.022888 | 0.089057 | Gm10406       |
| 39.4658 | 44.5684 | 70.362067 | 115.84806 | -1.140865723 | 0.022897 | 0.089069 | Tnfrsf12a     |
| 505.785 | 534.821 | 648.89462 | 818.25315 | -0.493566956 | 0.023127 | 0.089898 | 0610037L13Rik |
| 10.3857 | 20.5015 | 38.22137  | 58.533757 | -1.634203046 | 0.023133 | 0.089901 | Padi3         |

|         |         |           |           |              |          |          |               |
|---------|---------|-----------|-----------|--------------|----------|----------|---------------|
| 920.175 | 971.592 | 1188.3371 | 1280.4259 | -0.383269879 | 0.023139 | 0.089901 | Mbnl2         |
| 17.6557 | 52.5908 | 56.463387 | 163.40674 | -1.63568645  | 0.023157 | 0.08993  | Spock2        |
| 109.05  | 193.427 | 225.85355 | 337.78856 | -0.892920693 | 0.023157 | 0.08993  | Col20a1       |
| 1165.28 | 1214.94 | 1422.0087 | 1797.4741 | -0.434585563 | 0.02319  | 0.090018 | Kxd1          |
| 90.3558 | 75.7663 | 190.23818 | 121.94533 | -0.916199471 | 0.023197 | 0.090018 | Col5a3        |
| 203.56  | 207.689 | 289.26628 | 328.03293 | -0.584144151 | 0.023234 | 0.090142 | Gm12174       |
| 1.03857 | 5.34821 | 15.636015 | 28.047425 | -2.741800282 | 0.023341 | 0.090469 | Fam83a        |
| 4489.75 | 4253.61 | 5207.6616 | 5802.1587 | -0.332353994 | 0.023378 | 0.090589 | Rps10-ps2     |
| 11.4243 | 8.91369 | 28.666027 | 41.461412 | -1.784728388 | 0.023384 | 0.090593 | Sele          |
| 580.562 | 504.515 | 710.57001 | 778.01119 | -0.456039808 | 0.023399 | 0.090627 | Hcfc2         |
| 3.11572 | 2.67411 | 14.767347 | 21.950159 | -2.663215168 | 0.023449 | 0.09078  | 1700063D05Rik |
| 860.977 | 820.059 | 1086.703  | 1103.6052 | -0.381875851 | 0.023457 | 0.090788 | Uqcc2         |
| 586.793 | 632.872 | 839.1328  | 792.64463 | -0.420104212 | 0.023538 | 0.090974 | Vcpkmt        |
| 265.875 | 49.0253 | 1045.007  | 699.96618 | -2.471151039 | 0.023542 | 0.090974 | Slc7a11       |
| 787.238 | 948.416 | 1127.5304 | 1214.5755 | -0.431215327 | 0.023549 | 0.090974 | Cebpg         |
| 580.562 | 772.817 | 933.81756 | 973.12372 | -0.493485514 | 0.02359  | 0.091041 | Ndrp2         |
| 1519.43 | 1875.44 | 2108.256  | 2481.5874 | -0.434209768 | 0.023628 | 0.091167 | Fbxl20        |
| 263.797 | 237.995 | 335.30565 | 418.27248 | -0.584985939 | 0.023671 | 0.091265 | AL607105.1    |
| 1308.6  | 1357.55 | 1606.1662 | 1893.8109 | -0.391653925 | 0.023681 | 0.091282 | Rnf111        |
| 386.349 | 402.007 | 515.11982 | 586.55703 | -0.481149054 | 0.023694 | 0.091311 | Ap3m2         |
| 2556.97 | 2915.67 | 3325.2592 | 3751.0383 | -0.370227666 | 0.023706 | 0.091335 | Golga4        |
| 1976.4  | 1856.72 | 2379.2803 | 2459.6373 | -0.336161948 | 0.023729 | 0.091401 | Gm11808       |
| 0       | 0       | 9.5553424 | 6.0972664 | -5.470422812 | 0.023752 | 1        | Kcnn3         |
| 0       | 0       | 9.5553424 | 6.0972664 | -5.470422812 | 0.023752 | 1        | Gm5345        |
| 171.364 | 489.361 | 1746.8903 | 819.4726  | -1.957373625 | 0.0238   | 0.091608 | Plaur         |
| 1529.82 | 1597.33 | 1880.6651 | 2185.2603 | -0.37792951  | 0.023807 | 0.091615 | Ddx50         |
| 110.089 | 176.491 | 245.8329  | 246.32956 | -0.777232301 | 0.023824 | 0.091632 | Rnf24         |
| 195.252 | 215.711 | 276.23626 | 365.83598 | -0.640157772 | 0.023826 | 0.091632 | Gm11110       |
| 5.19286 | 21.3928 | 44.302042 | 53.655944 | -1.866283493 | 0.023829 | 0.091632 | Klk9          |
| 451.779 | 509.863 | 661.92463 | 653.62696 | -0.451537233 | 0.023874 | 0.091764 | Dram2         |
| 43.62   | 32.9806 | 110.32077 | 64.631024 | -1.200066412 | 0.02388  | 0.091764 | Sh3d19        |
| 7.27001 | 0.89137 | 29.534695 | 20.730706 | -2.653182001 | 0.024007 | 0.092186 | Gm10384       |
| 747.772 | 829.864 | 1124.0557 | 987.75716 | -0.421231135 | 0.024097 | 0.092401 | Ticam1        |
| 163.056 | 185.405 | 245.8329  | 299.98551 | -0.64405115  | 0.024236 | 0.092867 | 9230112E08Rik |
| 4.15429 | 9.80506 | 25.191357 | 34.144692 | -2.070745066 | 0.024255 | 0.092919 | Emp2          |
| 294.955 | 393.094 | 548.99786 | 474.36733 | -0.572515814 | 0.024308 | 0.093088 | Tcta          |
| 583.678 | 651.59  | 762.69006 | 970.68481 | -0.486771943 | 0.02452  | 0.093667 | Tvp23b        |
| 3.11572 | 3.56547 | 15.636015 | 23.169612 | -2.529987171 | 0.024689 | 0.094135 | Orml          |
| 390.503 | 668.526 | 908.6262  | 768.25557 | -0.662397348 | 0.024737 | 0.094293 | Gbp6          |
| 7.27001 | 9.80506 | 35.615367 | 26.827972 | -1.869598982 | 0.024782 | 0.0944   | Dab2          |
| 18.6943 | 25.8497 | 49.514047 | 64.631024 | -1.349819091 | 0.024792 | 0.094416 | Gm19391       |
| 596.141 | 174.708 | 2222.9201 | 1071.8994 | -2.096168247 | 0.024844 | 0.094567 | Adgrg1        |
| 369.732 | 450.141 | 489.0598  | 840.20331 | -0.694400732 | 0.024908 | 0.094744 | Qser1         |
| 533.826 | 557.997 | 680.16665 | 831.66714 | -0.467734967 | 0.024956 | 0.094905 | Cklf          |
| 983.528 | 961.787 | 1105.8137 | 1836.4966 | -0.595716649 | 0.025016 | 0.095089 | Slc11a2       |

|         |         |           |           |              |          |          |            |
|---------|---------|-----------|-----------|--------------|----------|----------|------------|
| 3912.3  | 4092.27 | 5168.5716 | 4797.3292 | -0.316311044 | 0.025038 | 0.095127 | Mapk14     |
| 707.268 | 1233.65 | 2102.1753 | 1191.4059 | -0.763148773 | 0.025193 | 0.095601 | Slfn1      |
| 528.633 | 602.565 | 721.86269 | 834.10604 | -0.458180237 | 0.025209 | 0.095612 | Dcaf6      |
| 32720.2 | 30545.4 | 36665.586 | 44328.346 | -0.356352641 | 0.025213 | 0.095612 | Rpl18      |
| 395.696 | 601.674 | 724.46869 | 773.13338 | -0.584791303 | 0.025338 | 0.095974 | Ccdc157    |
| 35.3115 | 32.0893 | 55.59472  | 106.09244 | -1.25647885  | 0.025423 | 0.096235 | Fam213b    |
| 1767.65 | 1782.74 | 2160.3761 | 2323.0585 | -0.336226608 | 0.025444 | 0.096282 | Ndufa13    |
| 573.292 | 605.239 | 727.07469 | 906.05379 | -0.468797478 | 0.02546  | 0.096321 | Uvssa      |
| 6.23143 | 2.67411 | 21.716687 | 23.169612 | -2.348359517 | 0.025477 | 0.096341 | Nostrin    |
| 13579.3 | 12851.8 | 15323.295 | 18490.57  | -0.355282052 | 0.025493 | 0.096379 | Rpl15      |
| 18.6943 | 0.89137 | 272.76159 | 54.875398 | -4.070914131 | 0.02559  | 0.096677 | Lox        |
| 98.6644 | 84.68   | 132.03746 | 203.6487  | -0.869167472 | 0.025622 | 0.096756 | Gm15440    |
| 83.0858 | 24.067  | 138.11813 | 131.70095 | -1.338758983 | 0.025629 | 0.096756 | Nuak2      |
| 953.409 | 1277.33 | 1310.8192 | 2118.1903 | -0.618953481 | 0.0257   | 0.096978 | Pik3r5     |
| 2718.98 | 2630.43 | 3245.3418 | 3420.5665 | -0.317283091 | 0.025773 | 0.097232 | Ubl5       |
| 20350.8 | 19914.1 | 23294.188 | 27688.906 | -0.340425247 | 0.025791 | 0.097255 | Rpl11      |
| 899.404 | 1055.38 | 1414.1907 | 1214.5755 | -0.427719585 | 0.025827 | 0.097369 | Wwp1       |
| 18.6943 | 20.5015 | 40.827372 | 64.631024 | -1.420693759 | 0.025946 | 0.097749 | Fam228b    |
| 2008.6  | 1981.51 | 2663.3345 | 2392.5673 | -0.342045304 | 0.025973 | 0.097825 | Glmp       |
| 21.81   | 6.23958 | 50.382715 | 45.119771 | -1.781434813 | 0.025986 | 0.097853 | Mtus2      |
| 4.15429 | 1.78274 | 24.32269  | 13.413986 | -2.692263226 | 0.026017 | 0.097924 | Ackr1      |
| 74.7772 | 221.951 | 324.88164 | 299.98551 | -1.071575585 | 0.02618  | 0.098423 | Cyslrl     |
| 12.4629 | 3.56547 | 39.958705 | 26.827972 | -2.078956058 | 0.026194 | 0.098444 | Siglece    |
| 61.2758 | 112.312 | 227.59088 | 130.4815  | -1.044976142 | 0.026225 | 0.0985   | Acsl6      |
| 11.4243 | 1.78274 | 26.928692 | 37.803052 | -2.311074182 | 0.026272 | 0.098653 | Gm44165    |
| 108.012 | 177.382 | 207.61153 | 309.74113 | -0.852905123 | 0.026292 | 0.098682 | Arhgef5    |
| 0       | 1.78274 | 125.08812 | 2.4389066 | -6.134102988 | 0.026375 | 0.098947 | S100a9     |
| 317.803 | 312.87  | 390.03171 | 576.8014  | -0.613647154 | 0.026392 | 0.098988 | B3gnt3     |
| 11.4243 | 0.89137 | 33.009365 | 34.144692 | -2.469669297 | 0.026401 | 0.098998 | Hoxa7      |
| 904.597 | 1165.02 | 1278.6786 | 1649.9203 | -0.499413991 | 0.026421 | 0.09905  | Map3k2     |
| 71.6615 | 65.0699 | 105.10877 | 153.65111 | -0.916488213 | 0.026592 | 0.099596 | Rcor2      |
| 1006.38 | 1219.39 | 1532.3295 | 1425.5409 | -0.410080069 | 0.026607 | 0.099607 | Eif3j1     |
| 8149.68 | 9830.91 | 12280.352 | 10942.154 | -0.369095582 | 0.026619 | 0.099607 | Rnh1       |
| 567.061 | 499.166 | 648.89462 | 899.95652 | -0.537235316 | 0.026694 | 0.099821 | Tmem71     |
| 32.1957 | 39.2202 | 56.463387 | 115.84806 | -1.262051864 | 0.026747 | 0.099993 | AC156795.1 |
| 10.3857 | 23.1756 | 33.878032 | 75.606103 | -1.691060143 | 0.026761 | 0.100023 | Gm4876     |
| 66.4686 | 87.3541 | 147.67347 | 129.26205 | -0.84750289  | 0.026823 | 0.100187 | Svip       |
| 0       | 0       | 12.161345 | 3.6583598 | -5.490389193 | 0.026833 | 1        | Cdh26      |
| 1.03857 | 1.78274 | 8.6866749 | 19.511252 | -3.297844161 | 0.027075 | 0.100893 | Gm42602    |
| 1.03857 | 1.78274 | 8.6866749 | 19.511252 | -3.297844161 | 0.027075 | 0.100893 | Prkcg      |
| 298.07  | 410.03  | 530.75584 | 512.17038 | -0.557367643 | 0.027099 | 0.10096  | Ube2w      |
| 1.03857 | 0.89137 | 15.636015 | 8.536173  | -3.658540717 | 0.027181 | 1        | AC112265.1 |
| 548.366 | 596.326 | 720.99402 | 834.10604 | -0.44039465  | 0.027261 | 0.101515 | Tmem135    |
| 111.127 | 136.379 | 227.59088 | 181.69854 | -0.726743684 | 0.027275 | 0.101545 | Slc6a8     |
| 600.295 | 632.872 | 826.10279 | 802.40026 | -0.401182241 | 0.027408 | 0.101939 | Isca2      |

|         |         |           |           |              |          |          |               |
|---------|---------|-----------|-----------|--------------|----------|----------|---------------|
| 9.34715 | 25.8497 | 48.64538  | 58.533757 | -1.594216353 | 0.027412 | 0.101939 | Slc4a3        |
| 6.23143 | 57.0476 | 190.23818 | 60.972664 | -1.985146845 | 0.027423 | 0.101954 | Zfp385b       |
| 16.6172 | 20.5015 | 64.281395 | 37.803052 | -1.463440157 | 0.027473 | 0.102116 | Gm7694        |
| 326.112 | 377.049 | 433.46508 | 642.65188 | -0.610818166 | 0.027681 | 0.102795 | Zfyve16       |
| 418.545 | 459.946 | 555.9472  | 676.79657 | -0.486557213 | 0.02769  | 0.102797 | Pcgf2         |
| 23.8872 | 9.80506 | 37.352702 | 68.289384 | -1.652278094 | 0.027694 | 0.102797 | Tmem141       |
| 273.145 | 302.174 | 378.73903 | 458.51443 | -0.538631767 | 0.02777  | 0.10303  | Gm9844        |
| 88.2787 | 133.705 | 291.00361 | 146.33439 | -0.980366426 | 0.027798 | 0.103109 | Pls1          |
| 32.1957 | 31.1979 | 58.200722 | 85.36173  | -1.174441344 | 0.027882 | 0.103373 | Tmem86a       |
| 7136.03 | 10183   | 11874.685 | 11731.141 | -0.446683302 | 0.027998 | 0.103703 | Ogt           |
| 747.772 | 790.644 | 915.57554 | 1232.8673 | -0.480151195 | 0.028003 | 0.103703 | Vamp4         |
| 51.9286 | 41.003  | 110.32077 | 79.264463 | -1.0352935   | 0.02804  | 0.103818 | Il13ra1       |
| 540.058 | 311.979 | 783.53808 | 593.87375 | -0.69540469  | 0.028136 | 0.104151 | Csgalnact2    |
| 10.3857 | 5.34821 | 22.585355 | 39.022505 | -1.972895336 | 0.028248 | 0.10454  | Rln3          |
| 1126.85 | 1165.91 | 1398.5547 | 1553.5835 | -0.363871024 | 0.028307 | 0.104735 | Plin3         |
| 716.615 | 786.187 | 934.68622 | 1065.8022 | -0.411324612 | 0.028327 | 0.104777 | Cdc42bpg      |
| 596.141 | 581.172 | 806.9921  | 752.40267 | -0.406320608 | 0.028332 | 0.104777 | Als2          |
| 973.142 | 1014.38 | 1267.3859 | 1276.7676 | -0.355984332 | 0.028353 | 0.104831 | Mtss1         |
| 1128.93 | 1255.05 | 1418.534  | 1799.913  | -0.431739301 | 0.028403 | 0.104995 | Fnip1         |
| 10.3857 | 19.6101 | 102.50276 | 18.291799 | -2.012259812 | 0.028433 | 0.105057 | Trem1l        |
| 438.278 | 458.163 | 587.21923 | 626.79899 | -0.436517037 | 0.028534 | 0.105372 | Agl           |
| 0       | 3.56547 | 25.191357 | 10.97508  | -3.305980366 | 0.028542 | 0.105372 | Trhr          |
| 1058.31 | 1069.64 | 1265.6485 | 1573.0947 | -0.41463154  | 0.028549 | 0.105372 | Zeb1          |
| 22.8486 | 21.3928 | 56.463387 | 51.217038 | -1.285663829 | 0.028551 | 0.105372 | Gm14286       |
| 105.934 | 162.229 | 239.75223 | 213.40432 | -0.755222262 | 0.028564 | 0.105379 | Gm26782       |
| 489.168 | 493.818 | 692.32799 | 630.45735 | -0.429259819 | 0.028566 | 0.105379 | Ocr1          |
| 3.11572 | 5.34821 | 18.242017 | 24.389066 | -2.318261632 | 0.02858  | 0.105405 | AC160403.2    |
| 163.056 | 148.859 | 229.32822 | 249.98792 | -0.619402132 | 0.028667 | 0.105656 | Gm9385        |
| 862.015 | 893.151 | 1001.5736 | 1592.606  | -0.562194055 | 0.028692 | 0.105698 | Ppcdc         |
| 658.455 | 669.418 | 855.63748 | 881.66472 | -0.387352888 | 0.028713 | 0.10575  | Ift20         |
| 331.305 | 408.247 | 503.82715 | 546.31507 | -0.503933009 | 0.028758 | 0.105837 | Necap1        |
| 146.439 | 174.708 | 243.2269  | 252.42683 | -0.624152115 | 0.028763 | 0.105837 | Epn2          |
| 15148.6 | 14787.8 | 17710.393 | 18758.85  | -0.284740007 | 0.028824 | 0.105966 | Rpl14         |
| 6620.9  | 7289.61 | 7986.5289 | 10373.889 | -0.400155365 | 0.028869 | 0.106082 | Cd3g          |
| 1515.28 | 1544.74 | 1872.8471 | 1980.3921 | -0.332139994 | 0.028953 | 0.106295 | Sec61g        |
| 1.03857 | 0       | 10.42401  | 10.97508  | -4.453378162 | 0.028976 | 1        | Serping1      |
| 868.247 | 846.8   | 1045.007  | 1214.5755 | -0.396838688 | 0.029018 | 0.10651  | Tpra1         |
| 29.08   | 29.4152 | 67.756065 | 62.192117 | -1.15272707  | 0.029044 | 0.10658  | Gm28935       |
| 1533.97 | 1511.76 | 1903.2505 | 1914.5417 | -0.325959845 | 0.029088 | 0.106669 | Sugp2         |
| 545.251 | 602.565 | 730.54936 | 814.59479 | -0.42737784  | 0.029107 | 0.106714 | Pnpla8        |
| 182.789 | 224.625 | 277.10493 | 354.8609  | -0.629526852 | 0.02915  | 0.1068   | Gm38394       |
| 15.5786 | 4.45684 | 45.17071  | 30.486332 | -1.93513505  | 0.029203 | 0.106969 | C030034L19Rik |
| 5.19286 | 0.89137 | 20.84802  | 18.291799 | -2.715737353 | 0.029221 | 0.107009 | Trf           |
| 1906.82 | 2107.2  | 2399.2596 | 2770.5979 | -0.364356928 | 0.029251 | 0.107098 | Clk1          |
| 0       | 0.89137 | 11.292677 | 9.7556262 | -4.46919462  | 0.029267 | 1        | Ip6k3         |

|         |         |           |           |              |          |          |               |
|---------|---------|-----------|-----------|--------------|----------|----------|---------------|
| 3.11572 | 3.56547 | 17.37335  | 19.511252 | -2.460310015 | 0.029336 | 0.107359 | Gpr35         |
| 1331.45 | 1271.09 | 1672.1849 | 1619.434  | -0.339250323 | 0.029367 | 0.107423 | Leprot        |
| 729.078 | 861.954 | 997.23028 | 1148.725  | -0.430171938 | 0.029374 | 0.107424 | Ptov1         |
| 10.3857 | 19.6101 | 40.827372 | 47.558678 | -1.548897664 | 0.029426 | 0.107589 | Mafa          |
| 1686.64 | 1681.12 | 2043.1059 | 2187.6992 | -0.328776657 | 0.029488 | 0.107794 | Stx5a         |
| 10.3857 | 2.67411 | 39.090037 | 20.730706 | -2.218901719 | 0.029518 | 0.10788  | Fzd1          |
| 956.525 | 1003.68 | 1152.7218 | 1541.3889 | -0.457397319 | 0.029564 | 0.108022 | Rpl37rt       |
| 2127    | 2427.2  | 2865.7341 | 2897.421  | -0.339360017 | 0.029622 | 0.10821  | Ankib1        |
| 117.359 | 122.118 | 151.14814 | 293.88824 | -0.889166794 | 0.029653 | 0.108274 | 5830418P13Rik |
| 0       | 0.89137 | 6.94934   | 14.633439 | -4.496677499 | 0.029724 | 1        | Cox6a2        |
| 744.656 | 946.634 | 1495.8454 | 999.95169 | -0.56217029  | 0.029777 | 0.108676 | Bnip3         |
| 2.07714 | 1.78274 | 15.636015 | 13.413986 | -2.917837014 | 0.029803 | 0.108749 | Dok7          |
| 445.548 | 428.748 | 621.96593 | 564.60687 | -0.441887018 | 0.029832 | 0.108789 | Prune1        |
| 2.07714 | 23.1756 | 55.59472  | 53.655944 | -2.098813405 | 0.029843 | 0.108796 | Grip2         |
| 2052.22 | 1961.9  | 2402.7343 | 2660.8471 | -0.334730097 | 0.029887 | 0.108931 | St3gal4       |
| 118.397 | 44.5684 | 255.38824 | 124.38423 | -1.227397698 | 0.029905 | 0.10897  | Steap3        |
| 1647.18 | 1593.77 | 1851.1304 | 2640.1164 | -0.469867694 | 0.029952 | 0.109117 | Acaal1a       |
| 462.165 | 443.01  | 580.26989 | 649.9686  | -0.441731302 | 0.029988 | 0.109196 | Lrrc20        |
| 189.02  | 166.686 | 259.73158 | 275.59644 | -0.589965173 | 0.029994 | 0.109196 | Prorsd1       |
| 1441.54 | 1671.32 | 1960.5825 | 2040.1453 | -0.361458675 | 0.030004 | 0.109199 | Trim41        |
| 43.62   | 57.0476 | 66.887397 | 171.94291 | -1.238450162 | 0.030008 | 0.109199 | Sbsn          |
| 0       | 0.89137 | 15.636015 | 6.0972664 | -4.523030456 | 0.030048 | 1        | Rgs7bp        |
| 2.07714 | 3.56547 | 23.454022 | 12.194533 | -2.655680253 | 0.030052 | 0.109334 | 1110028F11Rik |
| 756.081 | 98.0506 | 3136.7583 | 2392.5673 | -2.69485109  | 0.030073 | 0.109342 | Slc7a8        |
| 1108.16 | 1054.49 | 1289.9712 | 1570.6558 | -0.402625734 | 0.030075 | 0.109342 | Slc35b2       |
| 2.07714 | 3.56547 | 17.37335  | 17.072346 | -2.598302139 | 0.030162 | 0.109578 | D7Ertd128e    |
| 50.89   | 72.2009 | 122.48212 | 109.7508  | -0.913947757 | 0.030173 | 0.109578 | Il18          |
| 580.562 | 780.839 | 908.6262  | 997.51278 | -0.484091677 | 0.030233 | 0.109722 | Klhl28        |
| 1271.21 | 1261.29 | 1638.3069 | 1560.9002 | -0.337510022 | 0.030349 | 0.110043 | Plbd2         |
| 1217.21 | 1127.58 | 1513.2188 | 1471.8801 | -0.348786225 | 0.030473 | 0.110417 | Vopp1         |
| 5453.54 | 6086.27 | 6576.6816 | 8905.6673 | -0.423683469 | 0.030527 | 0.110562 | Mdm4          |
| 63.3529 | 84.68   | 158.96615 | 114.62861 | -0.8874734   | 0.030626 | 0.110897 | Sgms2         |
| 6037.22 | 7186.21 | 7676.4147 | 10008.053 | -0.419099655 | 0.03065  | 0.11091  | Nsd3          |
| 141.246 | 185.405 | 291.87228 | 230.47667 | -0.677899638 | 0.030662 | 0.110928 | Lym1          |
| 586.793 | 564.236 | 713.17601 | 840.20331 | -0.431266063 | 0.030688 | 0.110997 | Zcchc4        |
| 615.873 | 631.98  | 784.40675 | 864.59238 | -0.401100307 | 0.030704 | 0.110997 | Trmt2b        |
| 4454.44 | 6548.89 | 7391.4917 | 7769.1369 | -0.46218594  | 0.030781 | 0.111185 | Cish          |
| 6.23143 | 23.1756 | 46.908045 | 51.217038 | -1.725173072 | 0.030858 | 0.111413 | Slc15a1       |
| 4564.53 | 5952.56 | 6799.0605 | 6992.3451 | -0.390833181 | 0.03095  | 0.111669 | Med12         |
| 521.363 | 533.038 | 730.54936 | 673.13821 | -0.413514916 | 0.030975 | 0.111706 | Cipc          |
| 653.262 | 689.919 | 806.9921  | 1042.6326 | -0.459771198 | 0.030987 | 0.111706 | H2-DMa        |
| 617.951 | 626.632 | 722.73136 | 1104.8247 | -0.552362834 | 0.030991 | 0.111706 | Rexo5         |
| 193.174 | 219.277 | 272.76159 | 360.95817 | -0.615909087 | 0.031004 | 0.111706 | Tmem198b      |
| 4.15429 | 11.5878 | 27.79736  | 34.144692 | -1.95966621  | 0.031008 | 0.111706 | Slc6a19       |
| 1145.55 | 1070.53 | 1594.0049 | 1321.8874 | -0.397124328 | 0.031027 | 0.111749 | Pea15a        |



|         |         |           |           |              |          |          |               |
|---------|---------|-----------|-----------|--------------|----------|----------|---------------|
| 0       | 0       | 0         | 25.608519 | -6.170145257 | 0.031048 | 1        | Gm4631        |
| 1259.79 | 1525.13 | 2194.2541 | 1647.4814 | -0.4646399   | 0.031145 | 0.112098 | Idi1          |
| 669.879 | 756.772 | 926.86822 | 949.95411 | -0.394894855 | 0.031152 | 0.112098 | Acadsb        |
| 1.03857 | 0       | 6.0806725 | 15.852893 | -4.479189126 | 0.031184 | 1        | Gm15658       |
| 9.34715 | 8.91369 | 24.32269  | 39.022505 | -1.788908614 | 0.031191 | 0.112188 | Gm16267       |
| 1.03857 | 0       | 7.8180075 | 13.413986 | -4.436313029 | 0.031233 | 1        | Mirt2         |
| 282.492 | 283.455 | 397.84971 | 395.10286 | -0.486633913 | 0.031254 | 0.112363 | Lrrc57        |
| 1765.57 | 1959.23 | 2359.3009 | 2329.1558 | -0.331752083 | 0.031448 | 0.113012 | Sec63         |
| 153.709 | 345.851 | 405.66772 | 495.09803 | -0.847574276 | 0.03147  | 0.113063 | Zfp783        |
| 855.784 | 1137.39 | 1386.3933 | 1329.2041 | -0.445670461 | 0.03149  | 0.113108 | Epsti1        |
| 2711.71 | 3797.23 | 4323.3581 | 4496.1242 | -0.437941723 | 0.031496 | 0.113108 | Ifnar1        |
| 822.549 | 894.934 | 1162.2771 | 1069.4605 | -0.378161212 | 0.031536 | 0.113203 | Fam208a       |
| 16.6172 | 12.4792 | 28.666027 | 60.972664 | -1.618648698 | 0.031545 | 0.113207 | Gm15326       |
| 160.979 | 177.382 | 215.42954 | 347.54419 | -0.730075943 | 0.031621 | 0.113431 | Ptprf         |
| 2.07714 | 0       | 16.504682 | 9.7556262 | -3.722622097 | 0.031668 | 0.1135   | Phlda2        |
| 1287.83 | 1201.56 | 1537.5415 | 1624.3118 | -0.344856699 | 0.031707 | 0.113611 | Tmem214       |
| 1814.39 | 2191.88 | 3913.3471 | 2184.0408 | -0.606420136 | 0.031753 | 0.113726 | Irgm1         |
| 1552.67 | 1545.63 | 1794.667  | 2336.4725 | -0.414170196 | 0.031824 | 0.113932 | AC124744.2    |
| 1.03857 | 0       | 8.6866749 | 12.194533 | -4.414339909 | 0.031876 | 1        | Gm20627       |
| 2294.21 | 2101.85 | 2593.8411 | 3051.0721 | -0.360360941 | 0.031969 | 0.114375 | Krtcap2       |
| 6.23143 | 4.45684 | 13.89868  | 36.583598 | -2.235288743 | 0.03198  | 0.114387 | Ldhd          |
| 2898.66 | 2964.69 | 3498.9927 | 3748.5994 | -0.305488244 | 0.031995 | 0.114415 | Ubxn1         |
| 553.559 | 607.913 | 720.99402 | 852.39784 | -0.436132581 | 0.032053 | 0.114596 | Tcp1112       |
| 1376.11 | 1584.85 | 1788.5864 | 2080.3873 | -0.384920571 | 0.032071 | 0.114637 | Fam168a       |
| 20.7714 | 41.003  | 57.332055 | 96.336809 | -1.303779346 | 0.032109 | 0.114749 | Cage1         |
| 105.934 | 104.29  | 145.93614 | 215.84323 | -0.778906637 | 0.03212  | 0.11476  | Zfp420        |
| 10.3857 | 23.1756 | 42.564707 | 54.875398 | -1.525670869 | 0.032164 | 0.114893 | Jph4          |
| 1112.31 | 1135.6  | 1389.868  | 1459.6856 | -0.341711292 | 0.032201 | 0.114987 | Mcrip1        |
| 816.318 | 891.369 | 1025.8963 | 1265.7925 | -0.422837901 | 0.032385 | 0.115556 | Asns          |
| 10396.1 | 12857.1 | 14933.263 | 14713.923 | -0.350400231 | 0.032414 | 0.115632 | Ddx17         |
| 211.869 | 285.238 | 322.27564 | 465.83115 | -0.660891325 | 0.032472 | 0.115814 | 4931406C07Rik |
| 79.9701 | 97.1592 | 135.51213 | 170.72346 | -0.785062937 | 0.032479 | 0.115814 | Trim13        |
| 29.08   | 17.8274 | 55.59472  | 58.533757 | -1.287946672 | 0.032528 | 0.115936 | Slc7a7        |
| 346.883 | 321.784 | 426.51574 | 523.14546 | -0.504508929 | 0.032593 | 0.116129 | Pigc          |
| 527.595 | 1072.32 | 1163.1458 | 1448.7105 | -0.705820096 | 0.03261  | 0.116151 | Susd3         |
| 52.9672 | 61.5044 | 123.35078 | 92.678449 | -0.918627815 | 0.032653 | 0.116279 | Upb1          |
| 8.30858 | 11.5878 | 37.352702 | 28.047425 | -1.715627558 | 0.032661 | 0.116282 | Cacna1d       |
| 395.696 | 451.924 | 535.09918 | 653.62696 | -0.485534313 | 0.032689 | 0.116303 | Coq10a        |
| 7.27001 | 15.1533 | 49.514047 | 26.827972 | -1.764795359 | 0.032796 | 0.116583 | Gngl1         |
| 12463.9 | 14143.3 | 15327.638 | 19133.222 | -0.372994456 | 0.03287  | 0.11676  | Pik3cd        |
| 398.812 | 465.294 | 564.63387 | 625.57953 | -0.460117495 | 0.032875 | 0.11676  | Xpa           |
| 406.082 | 411.812 | 538.57385 | 565.82632 | -0.432607108 | 0.032947 | 0.11699  | Crat          |
| 96.5872 | 98.0506 | 147.67347 | 174.38182 | -0.723949676 | 0.033309 | 0.118146 | Capn5         |
| 10639.1 | 10575.2 | 13249.785 | 12487.202 | -0.278878208 | 0.033332 | 0.1182   | Tmbim6        |
| 132.937 | 240.67  | 271.02426 | 381.68888 | -0.800594234 | 0.033355 | 0.118231 | Icosl         |

|         |         |           |           |              |          |          |               |
|---------|---------|-----------|-----------|--------------|----------|----------|---------------|
| 3.11572 | 3.56547 | 25.191357 | 12.194533 | -2.490160431 | 0.033409 | 0.118395 | Ccdc180       |
| 1390.65 | 1527.81 | 1745.153  | 2020.6341 | -0.366818209 | 0.033472 | 0.118566 | Tbrg1         |
| 16.6172 | 23.1756 | 63.412727 | 40.241958 | -1.382912959 | 0.033592 | 0.118886 | Gm17590       |
| 385.31  | 508.972 | 619.35992 | 641.43243 | -0.494005875 | 0.033626 | 0.118976 | Ing2          |
| 2.07714 | 1.78274 | 14.767347 | 13.413986 | -2.873252031 | 0.033671 | 0.119054 | Gm16897       |
| 310.533 | 372.592 | 460.39377 | 501.1953  | -0.491306666 | 0.033676 | 0.119054 | Acot11        |
| 2780.26 | 2525.25 | 3156.7377 | 3530.3172 | -0.33368561  | 0.03382  | 0.119485 | Mboat7        |
| 3.11572 | 3.56547 | 19.979352 | 15.852893 | -2.423369431 | 0.033931 | 0.119799 | Mmp25         |
| 1529.82 | 1499.28 | 1773.819  | 2157.2129 | -0.375227883 | 0.03396  | 0.119865 | Rgl2          |
| 234.717 | 250.475 | 357.89101 | 334.1302  | -0.512671347 | 0.034122 | 0.120314 | Anxa9         |
| 83.0858 | 67.744  | 126.82545 | 135.35931 | -0.798736618 | 0.034175 | 0.120449 | 4930520O04Rik |
| 54.0058 | 18.7187 | 150.27948 | 54.875398 | -1.506725696 | 0.034196 | 0.120495 | Clstn3        |
| 1356.38 | 244.235 | 4572.6657 | 3386.4218 | -2.314160621 | 0.03428  | 0.120685 | Cd63          |
| 238.872 | 214.82  | 302.29629 | 364.61653 | -0.554336608 | 0.034444 | 0.121068 | Gpt2          |
| 3.11572 | 4.45684 | 26.060025 | 13.413986 | -2.383094781 | 0.034593 | 0.121534 | Ankrd35       |
| 1330.41 | 1303.18 | 1541.0161 | 1908.4444 | -0.3884242   | 0.034739 | 0.121982 | Ctss          |
| 69.5844 | 62.3958 | 101.6341  | 140.23713 | -0.870695714 | 0.034777 | 0.122065 | Intu          |
| 5618.68 | 4861.52 | 7006.672  | 6237.5035 | -0.337990698 | 0.03481  | 0.122154 | Slc7a5        |
| 4198.95 | 4756.34 | 5628.0967 | 5486.3203 | -0.311535008 | 0.034965 | 0.122617 | Acadl         |
| 763.351 | 913.653 | 1158.8024 | 1060.9244 | -0.404430415 | 0.034993 | 0.122646 | Pcyox1        |
| 0       | 2.67411 | 23.454022 | 7.3167197 | -3.48657468  | 0.035037 | 0.122762 | 4921523L03Rik |
| 95.5487 | 96.2678 | 165.04682 | 148.7733  | -0.711709795 | 0.035103 | 0.122968 | Galr3         |
| 39.4658 | 51.6994 | 96.422092 | 82.922823 | -0.975448193 | 0.035183 | 0.123167 | Gm2011        |
| 494.36  | 879.781 | 868.66749 | 1369.446  | -0.701993323 | 0.035242 | 0.123347 | Ly6c1         |
| 3.11572 | 0.89137 | 6.0806725 | 28.047425 | -3.102664622 | 0.035268 | 0.123412 | Hebp2         |
| 47.7743 | 32.9806 | 124.21945 | 59.753211 | -1.197278064 | 0.035279 | 0.123424 | Hemgn         |
| 1.03857 | 9.80506 | 39.090037 | 19.511252 | -2.417188003 | 0.035356 | 0.123569 | Adap2         |
| 3.11572 | 2.67411 | 13.030012 | 20.730706 | -2.541016876 | 0.035359 | 0.123569 | Tifab         |
| 39.4658 | 60.6131 | 89.472752 | 109.7508  | -0.986636231 | 0.035392 | 0.123656 | A230072C01Rik |
| 0       | 1.78274 | 13.030012 | 10.97508  | -3.69575104  | 0.035446 | 1        | Mefv          |
| 540.058 | 445.684 | 638.47061 | 712.16072 | -0.454343426 | 0.035466 | 0.123891 | Rab19         |
| 1268.1  | 1478.78 | 1671.3163 | 1898.6888 | -0.37716526  | 0.035512 | 0.123971 | 1600014C10Rik |
| 2767.8  | 2530.6  | 3198.4337 | 3385.2023 | -0.313293324 | 0.035559 | 0.124081 | Bri3bp        |
| 157.863 | 153.315 | 216.29821 | 259.74355 | -0.611139412 | 0.035626 | 0.124286 | Umad1         |
| 796.585 | 754.989 | 912.96954 | 1208.4782 | -0.449964183 | 0.035719 | 0.124557 | Abhd17b       |
| 6.23143 | 3.56547 | 26.928692 | 17.072346 | -2.182921591 | 0.035757 | 0.124662 | Pcdh1         |
| 1770.77 | 1927.14 | 2270.6968 | 2345.0087 | -0.319466327 | 0.035769 | 0.124678 | Ctage5        |
| 398.812 | 557.997 | 593.2999  | 853.6173  | -0.594077919 | 0.03578  | 0.124687 | Podnl1        |
| 328.189 | 311.088 | 398.71838 | 523.14546 | -0.525911383 | 0.035831 | 0.124812 | Nicn1         |
| 451.779 | 504.515 | 589.82523 | 735.33033 | -0.468358265 | 0.03587  | 0.124893 | Cep19         |
| 2791.68 | 2642.02 | 3129.809  | 3871.7642 | -0.365291122 | 0.035908 | 0.125001 | Mthfd2        |
| 2213.2  | 2299.73 | 2801.4527 | 2754.745  | -0.300020494 | 0.035923 | 0.125024 | Yipf3         |
| 11.4243 | 29.4152 | 64.281395 | 48.778131 | -1.462686626 | 0.035978 | 0.12517  | Rin2          |
| 276.26  | 250.475 | 373.52702 | 368.27489 | -0.494867193 | 0.035987 | 0.12517  | Tmem156       |
| 19.7329 | 3.56547 | 42.564707 | 43.900318 | -1.906648207 | 0.036262 | 0.12589  | Itgal         |

|         |         |           |           |              |          |          |               |
|---------|---------|-----------|-----------|--------------|----------|----------|---------------|
| 220.177 | 168.469 | 321.40697 | 270.71863 | -0.611012798 | 0.036265 | 0.12589  | Hrh2          |
| 9.34715 | 16.936  | 47.776712 | 31.705785 | -1.593854996 | 0.036324 | 0.126066 | Stac2         |
| 5.19286 | 7.13095 | 19.979352 | 29.266879 | -1.987897251 | 0.036331 | 0.126066 | AC091785.2    |
| 504.746 | 845.909 | 1609.6409 | 745.08595 | -0.802461288 | 0.03637  | 0.126146 | Dhx58         |
| 1454    | 1455.61 | 1865.8978 | 1765.7684 | -0.320146927 | 0.0364   | 0.126205 | Nrbp1         |
| 63.3529 | 50.808  | 92.078754 | 123.16478 | -0.913177642 | 0.036403 | 0.126205 | Nectin2       |
| 240.949 | 310.196 | 379.6077  | 423.15029 | -0.53996068  | 0.036484 | 0.126458 | Atat1         |
| 466.319 | 549.974 | 616.75392 | 828.00878 | -0.505061989 | 0.036531 | 0.126593 | Slc25a30      |
| 1.03857 | 0       | 7.8180075 | 12.194533 | -4.35108664  | 0.036611 | 1        | Foxb1         |
| 452.818 | 459.055 | 588.95656 | 625.57953 | -0.41273937  | 0.036615 | 0.126804 | Zfp787        |
| 2076.11 | 1863.85 | 2209.8901 | 3265.6959 | -0.47422806  | 0.036643 | 0.126853 | Pitpnc1       |
| 2002.37 | 2277.45 | 2751.9386 | 2627.9218 | -0.329936566 | 0.036645 | 0.126853 | Ggta1         |
| 2823.88 | 2814.05 | 3305.2798 | 3693.724  | -0.311614604 | 0.036817 | 0.127313 | Nr1h2         |
| 1968.09 | 1931.6  | 2439.2183 | 2370.6172 | -0.302827033 | 0.036869 | 0.127466 | Ppib          |
| 0       | 0       | 10.42401  | 3.6583598 | -5.321887657 | 0.037092 | 1        | Il1f6         |
| 5404.73 | 6031    | 6886.7959 | 7199.6522 | -0.300577792 | 0.037147 | 0.128344 | Utrn          |
| 0       | 2.67411 | 17.37335  | 10.97508  | -3.362113397 | 0.037194 | 0.128452 | Lrrc2         |
| 3464.68 | 3377.4  | 4064.4952 | 4303.4506 | -0.290296941 | 0.03724  | 0.128582 | Atp5e         |
| 2.07714 | 4.45684 | 19.979352 | 15.852893 | -2.443230453 | 0.037269 | 0.128656 | Adamts13      |
| 1942.13 | 2155.33 | 2348.0082 | 3108.3864 | -0.412387602 | 0.037308 | 0.128735 | Marf1         |
| 205.637 | 329.806 | 415.22306 | 414.61412 | -0.630043646 | 0.037355 | 0.128867 | Zfp446        |
| 1122.7  | 1200.67 | 1442.8567 | 1487.733  | -0.334511698 | 0.037363 | 0.128867 | Cnst          |
| 492.283 | 517.885 | 603.72391 | 813.37534 | -0.486106508 | 0.037403 | 0.128981 | Vps8          |
| 28.0415 | 50.808  | 66.01873  | 113.40916 | -1.176302117 | 0.037415 | 0.128982 | Nmb           |
| 1525.66 | 1526.91 | 1982.2992 | 1831.6188 | -0.321701714 | 0.03742  | 0.128982 | Gramd3        |
| 1956.67 | 2128.59 | 2332.3722 | 3104.7281 | -0.411588562 | 0.037452 | 0.129065 | Mif4gd        |
| 527.595 | 604.348 | 693.19666 | 857.27566 | -0.451812947 | 0.037549 | 0.129289 | Yipf6         |
| 527.595 | 513.428 | 616.75392 | 851.17839 | -0.493832507 | 0.037556 | 0.129289 | Gpsm1         |
| 3.11572 | 3.56547 | 12.161345 | 24.389066 | -2.440413186 | 0.037556 | 0.129289 | Gm43769       |
| 1601.48 | 1591.09 | 1880.6651 | 2164.5296 | -0.340823824 | 0.037557 | 0.129289 | Affl          |
| 128.783 | 147.076 | 194.58152 | 237.79339 | -0.644676692 | 0.037642 | 0.129498 | A930024E05Rik |
| 369.732 | 397.55  | 491.6658  | 557.29015 | -0.449323346 | 0.03775  | 0.129801 | Slc35d2       |
| 275.222 | 309.305 | 403.93039 | 410.95576 | -0.478297506 | 0.037759 | 0.129801 | Prrg2         |
| 36.35   | 41.003  | 64.281395 | 97.556262 | -1.058312212 | 0.03777  | 0.129801 | Gm37090       |
| 3041.98 | 2984.3  | 3539.82   | 3899.8116 | -0.303674985 | 0.037812 | 0.129919 | Rps12-ps3     |
| 19.7329 | 34.7634 | 59.06939  | 68.289384 | -1.216701296 | 0.037938 | 0.130238 | Gm44292       |
| 373.886 | 286.129 | 457.78777 | 482.9035  | -0.512171172 | 0.037974 | 0.130336 | Rffl          |
| 396.735 | 405.573 | 504.69581 | 591.43484 | -0.448416284 | 0.03804  | 0.13045  | Rp2           |
| 284.569 | 287.912 | 363.97168 | 453.63662 | -0.511752807 | 0.03816  | 0.130752 | Nfxl1         |
| 7.27001 | 9.80506 | 25.191357 | 32.925239 | -1.758498424 | 0.038216 | 0.130859 | Gm37584       |
| 288.723 | 329.806 | 380.47636 | 536.55944 | -0.564837762 | 0.038318 | 0.131152 | Gm13680       |
| 5.19286 | 4.45684 | 13.89868  | 30.486332 | -2.194960301 | 0.038343 | 0.131203 | Cldn10        |
| 12.4629 | 65.0699 | 131.16879 | 90.239543 | -1.508525983 | 0.038631 | 0.131999 | Trpm6         |
| 322.996 | 406.464 | 540.31118 | 485.34241 | -0.491414816 | 0.038641 | 0.132007 | Lrsam1        |
| 139.169 | 214.82  | 244.09557 | 341.44692 | -0.721416409 | 0.038685 | 0.132127 | Zfp54         |

|         |         |           |           |              |          |          |               |
|---------|---------|-----------|-----------|--------------|----------|----------|---------------|
| 311.572 | 354.765 | 463.86844 | 453.63662 | -0.460873533 | 0.038773 | 0.132373 | Zdhhc17       |
| 9.34715 | 6.23958 | 71.230735 | 7.3167197 | -2.346408026 | 0.038919 | 0.132759 | Serpinb10     |
| 2069.87 | 2228.42 | 2543.4584 | 2841.3261 | -0.324531394 | 0.03896  | 0.132826 | Arf4          |
| 6.23143 | 18.7187 | 26.060025 | 62.192117 | -1.804955525 | 0.03903  | 0.132996 | Tmod1         |
| 5.19286 | 2.67411 | 13.89868  | 25.608519 | -2.333139482 | 0.039096 | 0.133166 | Cacnb4        |
| 2.07714 | 7.13095 | 15.636015 | 30.486332 | -2.299278852 | 0.039129 | 0.133231 | Gm30790       |
| 120.474 | 116.769 | 171.1275  | 203.6487  | -0.65746837  | 0.039147 | 0.133231 | Gm7331        |
| 6.23143 | 1.78274 | 25.191357 | 15.852893 | -2.382017207 | 0.039246 | 0.133422 | Zmynd15       |
| 256.527 | 286.129 | 322.27564 | 529.24272 | -0.646448811 | 0.039269 | 0.133472 | Epb41l4aos    |
| 8.30858 | 1.78274 | 24.32269  | 23.169612 | -2.256446387 | 0.039382 | 0.133772 | Lypd6         |
| 1731.3  | 1456.5  | 2123.0234 | 1963.3198 | -0.358976254 | 0.039382 | 0.133772 | Gm7367        |
| 535.903 | 434.097 | 615.01659 | 726.79416 | -0.467764381 | 0.039456 | 0.133969 | Uap1l1        |
| 1574.48 | 1774.72 | 1959.7139 | 2402.323  | -0.380238166 | 0.039533 | 0.1342   | Zcchc11       |
| 57.1215 | 111.421 | 158.09748 | 157.30947 | -0.899862226 | 0.039656 | 0.134562 | Spo11         |
| 247.18  | 330.698 | 388.29437 | 460.95334 | -0.552417555 | 0.039694 | 0.134562 | Cmc1          |
| 796.585 | 776.382 | 940.7669  | 1123.1165 | -0.390713449 | 0.039698 | 0.134562 | Gm9493        |
| 1180.86 | 1471.65 | 1606.1662 | 1931.614  | -0.41436221  | 0.039698 | 0.134562 | Wdr13         |
| 7.27001 | 3.56547 | 72.96807  | 2.4389066 | -2.813396749 | 0.039855 | 0.134982 | Cxcl5         |
| 10.3857 | 2.67411 | 48.64538  | 13.413986 | -2.272278796 | 0.039892 | 0.135049 | Gpr84         |
| 244.065 | 267.411 | 350.073   | 369.49434 | -0.491085201 | 0.040025 | 0.135416 | Zfp51         |
| 20.7714 | 8.91369 | 55.59472  | 32.925239 | -1.591026482 | 0.040042 | 0.135427 | Pdgrfb        |
| 950.294 | 921.675 | 1140.5604 | 1242.6229 | -0.347794811 | 0.040045 | 0.135427 | Slc35d1       |
| 6.23143 | 6.23958 | 32.140697 | 17.072346 | -1.988353513 | 0.040072 | 0.135488 | Gm14023       |
| 2013.79 | 2094.72 | 2496.5504 | 2553.5352 | -0.297480417 | 0.040171 | 0.135765 | Stk40         |
| 22.8486 | 69.5268 | 155.49148 | 76.825557 | -1.328704777 | 0.040207 | 0.135856 | 4933406118Rik |
| 62.3143 | 114.987 | 149.41081 | 176.82073 | -0.874203501 | 0.040264 | 0.135967 | Inha          |
| 121.513 | 143.51  | 185.02618 | 235.35448 | -0.661316099 | 0.040273 | 0.135968 | Gm5113        |
| 5.19286 | 28.5238 | 46.908045 | 67.06993  | -1.743072799 | 0.040325 | 0.136115 | Ggt5          |
| 0       | 0.89137 | 5.212005  | 14.633439 | -4.374351572 | 0.040385 | 1        | Slc25a2       |
| 14.54   | 20.5015 | 29.534695 | 71.947744 | -1.521971968 | 0.040416 | 0.136339 | Tm6sf2        |
| 25.9643 | 33.872  | 60.806725 | 68.289384 | -1.104459215 | 0.040507 | 0.136616 | Spry4         |
| 1656.52 | 1733.71 | 2010.9653 | 2231.5995 | -0.322911269 | 0.040574 | 0.136755 | Arih2         |
| 147.477 | 181.839 | 234.54022 | 265.84082 | -0.600396083 | 0.040679 | 0.136995 | Nphp3         |
| 250.296 | 292.369 | 420.43507 | 354.8609  | -0.515538773 | 0.040708 | 0.137038 | Fam210b       |
| 37.3886 | 59.7217 | 239.75223 | 41.461412 | -1.5369292   | 0.040709 | 0.137038 | Ache          |
| 250.296 | 189.862 | 280.5796  | 409.7363  | -0.647697565 | 0.040725 | 0.137063 | Gm13436       |
| 539.019 | 681.897 | 762.69006 | 920.68723 | -0.461403934 | 0.040756 | 0.137113 | Fchsd2        |
| 17.6557 | 16.936  | 56.463387 | 34.144692 | -1.396331179 | 0.040771 | 0.137134 | Pde10a        |
| 211.869 | 191.644 | 248.4389  | 389.0056  | -0.656607366 | 0.040848 | 0.137308 | Gm11131       |
| 2150.88 | 2004.69 | 2825.7754 | 2424.2731 | -0.337983305 | 0.040873 | 0.137347 | Prkcd         |
| 250.296 | 312.87  | 386.55704 | 417.05302 | -0.510749143 | 0.040877 | 0.137347 | Ccdc28a       |
| 2.07714 | 0.89137 | 2.6060025 | 29.266879 | -3.429429962 | 0.040961 | 0.137486 | Pom12l12      |
| 1354.3  | 1531.37 | 2106.5187 | 1681.6261 | -0.393176948 | 0.040999 | 0.137585 | Gan           |
| 3.11572 | 5.34821 | 16.504682 | 23.169612 | -2.214245806 | 0.04104  | 0.137665 | Fbxo27        |
| 154.747 | 182.731 | 250.17624 | 252.42683 | -0.573157106 | 0.041178 | 0.138041 | Acad12        |

|         |         |           |           |              |          |          |            |
|---------|---------|-----------|-----------|--------------|----------|----------|------------|
| 193.174 | 273.65  | 335.30565 | 365.83598 | -0.584055284 | 0.041307 | 0.138418 | Mapre3     |
| 9.34715 | 8.91369 | 23.454022 | 36.583598 | -1.711734023 | 0.041404 | 0.138588 | Catsperg1  |
| 0       | 0.89137 | 13.030012 | 6.0972664 | -4.338224715 | 0.041505 | 1        | Sprr2g     |
| 1494.51 | 1371.82 | 1660.0236 | 2090.1429 | -0.387039206 | 0.041506 | 0.138868 | Gm6863     |
| 197.329 | 260.28  | 310.1143  | 374.37216 | -0.577449599 | 0.041511 | 0.138868 | Sirt3      |
| 486.052 | 612.37  | 692.32799 | 821.91151 | -0.461091966 | 0.041577 | 0.139061 | Usp20      |
| 889.018 | 927.023 | 1033.7143 | 1476.7579 | -0.465640292 | 0.04172  | 0.139469 | Rnaset2a   |
| 25.9643 | 24.9583 | 40.827372 | 84.142276 | -1.287816528 | 0.041725 | 0.139469 | Gm15927    |
| 10227.9 | 9954.81 | 11570.651 | 13188.387 | -0.294720044 | 0.041789 | 0.139568 | Eif3h      |
| 397.773 | 802.232 | 822.62812 | 1135.311  | -0.704544388 | 0.041791 | 0.139568 | Marveld1   |
| 3.11572 | 12.4792 | 20.84802  | 43.900318 | -2.03195587  | 0.041798 | 0.139568 | Gm38411    |
| 106.973 | 108.747 | 153.75415 | 193.89307 | -0.685138568 | 0.041836 | 0.139639 | Dfna5      |
| 591.986 | 477.774 | 696.67133 | 748.74431 | -0.434576774 | 0.04196  | 0.139936 | Hexb       |
| 0       | 1.78274 | 9.5553424 | 13.413986 | -3.628028586 | 0.042058 | 1        | CT030170.6 |
| 5.19286 | 0.89137 | 11.292677 | 26.827972 | -2.665948738 | 0.042077 | 0.140183 | Gm15657    |
| 3515.57 | 3552.1  | 4769.8532 | 4053.4627 | -0.320462943 | 0.042224 | 0.140614 | S100a11    |
| 24612.1 | 23777.3 | 27456.842 | 32433.799 | -0.307584335 | 0.042225 | 0.140614 | Rpl6       |
| 29.08   | 47.2425 | 75.574072 | 82.922823 | -1.048142405 | 0.042262 | 0.140681 | Tmem151b   |
| 2005.48 | 2314.88 | 2602.5278 | 2846.204  | -0.334177746 | 0.042496 | 0.141198 | Nbr1       |
| 3.11572 | 8.91369 | 62.54406  | 6.0972664 | -2.510941805 | 0.042561 | 0.141385 | Cavin2     |
| 1113.35 | 1104.41 | 1223.9525 | 1924.2973 | -0.504255209 | 0.042714 | 0.141807 | Impa2      |
| 1490.35 | 1479.67 | 1746.8903 | 1992.5867 | -0.331688833 | 0.042768 | 0.141906 | Tmem258    |
| 0       | 2.67411 | 11.292677 | 15.852893 | -3.292547924 | 0.04291  | 0.142194 | Npffr1     |
| 2018.98 | 2051.93 | 2362.7756 | 2749.8671 | -0.328087348 | 0.042996 | 0.142362 | Clk3       |
| 9.34715 | 6.23958 | 21.716687 | 32.925239 | -1.810491491 | 0.043054 | 0.142524 | Cmya5      |
| 1270.17 | 1411.93 | 1629.6202 | 1753.5738 | -0.33428516  | 0.043134 | 0.142758 | Sc5d       |
| 50.89   | 48.1339 | 79.91741  | 107.31189 | -0.915331883 | 0.04328  | 0.143124 | Atg4c      |
| 411.275 | 471.534 | 582.87589 | 598.75156 | -0.419538158 | 0.043351 | 0.14333  | Bmt2       |
| 7.27001 | 12.4792 | 39.958705 | 24.389066 | -1.702691024 | 0.043436 | 0.143554 | Gm44250    |
| 1.03857 | 1.78274 | 4.3433375 | 23.169612 | -3.259657885 | 0.043487 | 0.143663 | Zgl6       |
| 1208.9  | 1014.38 | 1276.9412 | 1791.3769 | -0.46399485  | 0.043517 | 0.143701 | Ppmlm      |
| 3.11572 | 1.78274 | 20.84802  | 9.7556262 | -2.664050831 | 0.043527 | 0.143706 | Fcrlb      |
| 313.649 | 376.158 | 867.79883 | 348.76364 | -0.820443278 | 0.043605 | 0.143874 | Isg20      |
| 7319.86 | 7404.6  | 8296.6432 | 10264.138 | -0.333816863 | 0.043645 | 0.143949 | Rpl22      |
| 518.248 | 524.125 | 683.64132 | 673.13821 | -0.380419537 | 0.043669 | 0.143987 | Mcfd2      |
| 4.15429 | 15.1533 | 32.140697 | 36.583598 | -1.815744909 | 0.043675 | 0.143987 | Gm10390    |
| 44.6586 | 62.3958 | 68.624732 | 167.0651  | -1.13027355  | 0.043766 | 0.144231 | Hid1       |
| 2.07714 | 2.67411 | 12.161345 | 17.072346 | -2.610946898 | 0.043806 | 0.144333 | Gm14207    |
| 1126.85 | 1145.41 | 1315.1626 | 1653.5786 | -0.384563827 | 0.04389  | 0.144549 | Nck2       |
| 12.4629 | 4.45684 | 33.009365 | 26.827972 | -1.838443209 | 0.043922 | 0.144625 | Smim1      |
| 1088.42 | 1017.05 | 1334.2733 | 1309.6928 | -0.328962872 | 0.043953 | 0.144652 | Rab11a     |
| 167.21  | 187.187 | 227.59088 | 319.49676 | -0.622216771 | 0.043953 | 0.144652 | Zrsr1      |
| 304.302 | 254.04  | 418.69773 | 369.49434 | -0.49991146  | 0.044025 | 0.144784 | Mitd1      |
| 2635.9  | 2393.32 | 2865.7341 | 3653.482  | -0.373918623 | 0.044041 | 0.144784 | Rps16-ps2  |
| 167.21  | 67.744  | 275.3676  | 184.13745 | -0.973046748 | 0.044041 | 0.144784 | Gpr34      |

|         |         |           |           |              |          |          |               |
|---------|---------|-----------|-----------|--------------|----------|----------|---------------|
| 1.03857 | 3.56547 | 11.292677 | 19.511252 | -2.71219198  | 0.044092 | 0.144917 | Gm5049        |
| 826.704 | 831.647 | 971.17026 | 1219.4533 | -0.400184509 | 0.044138 | 0.145012 | Tpcn1         |
| 2.07714 | 5.34821 | 13.89868  | 24.389066 | -2.343289045 | 0.044244 | 0.14529  | Klrb1b        |
| 19.7329 | 16.936  | 74.705405 | 28.047425 | -1.496985177 | 0.044263 | 0.14529  | Ccdc80        |
| 3960.08 | 4368.6  | 8042.1237 | 4296.1339 | -0.567273642 | 0.044273 | 0.14529  | Lgals3bp      |
| 58.1601 | 97.1592 | 104.2401  | 207.30706 | -0.996690877 | 0.044277 | 0.14529  | Gpr179        |
| 2.07714 | 0       | 11.292677 | 12.194533 | -3.554242426 | 0.044315 | 1        | Ppp1r9a       |
| 10.3857 | 8.91369 | 17.37335  | 51.217038 | -1.821172927 | 0.044321 | 0.145404 | 5330439K02Rik |
| 2883.08 | 3038.68 | 3441.6606 | 3888.8365 | -0.307427866 | 0.044472 | 0.14581  | Copb1         |
| 1558.9  | 1581.29 | 1837.2318 | 2109.6542 | -0.329140076 | 0.044693 | 0.146355 | Azi2          |
| 1.03857 | 0       | 3.47467   | 17.072346 | -4.378311426 | 0.044699 | 1        | Tmem59l       |
| 327.15  | 388.637 | 407.40506 | 708.50236 | -0.637541645 | 0.044734 | 0.146401 | Il6st         |
| 960.679 | 968.918 | 1354.2526 | 1134.0916 | -0.367974293 | 0.044907 | 0.146909 | Cln7          |
| 13.5014 | 18.7187 | 44.302042 | 39.022505 | -1.368232117 | 0.044951 | 0.146963 | Gm16224       |
| 416.468 | 288.803 | 504.69581 | 512.17038 | -0.529383675 | 0.044959 | 0.146963 | Acvr1b        |
| 4.15429 | 0.89137 | 18.242017 | 13.413986 | -2.68026378  | 0.044977 | 0.146963 | P2ry6         |
| 2715.87 | 2398.67 | 2987.3475 | 3486.4169 | -0.339749013 | 0.04498  | 0.146963 | Sdcbp         |
| 575.369 | 960.895 | 1367.2826 | 965.807   | -0.602882861 | 0.045001 | 0.146979 | Asph          |
| 778.929 | 978.723 | 1279.5472 | 1075.5578 | -0.42237752  | 0.045166 | 0.147435 | Ptpn4         |
| 1119.58 | 1059.84 | 1300.3952 | 1463.3439 | -0.342094477 | 0.04533  | 0.147872 | Inpp1         |
| 17.6557 | 15.1533 | 36.484035 | 47.558678 | -1.3551984   | 0.04535  | 0.147903 | Shcbp1l       |
| 8.30858 | 8.02232 | 60.806725 | 9.7556262 | -2.122024874 | 0.045472 | 0.148247 | F5            |
| 0       | 0       | 4.3433375 | 8.536173  | -5.179721822 | 0.045476 | 1        | Bfsp1         |
| 5356.96 | 5668.21 | 6115.4192 | 8281.3072 | -0.384611598 | 0.045503 | 0.148267 | Stat5b        |
| 17.6557 | 11.5878 | 80.786077 | 18.291799 | -1.773198913 | 0.045621 | 0.148582 | Cx3cr1        |
| 259.643 | 294.152 | 307.50829 | 602.40992 | -0.713012773 | 0.045636 | 0.1486   | Mgst2         |
| 61.2758 | 82.8973 | 118.13878 | 132.92041 | -0.795814807 | 0.045654 | 0.1486   | A430046D13Rik |
| 85.1629 | 106.964 | 171.1275  | 143.89549 | -0.713733681 | 0.045724 | 0.148758 | Vmn2r96       |
| 54.0058 | 106.964 | 132.90613 | 171.94291 | -0.914952489 | 0.04574  | 0.148758 | Ndnf          |
| 51.9286 | 56.1562 | 72.96807  | 458.51443 | -2.296639252 | 0.045863 | 0.1491   | Tmie          |
| 1627.44 | 1712.32 | 1986.6426 | 2153.5545 | -0.309386335 | 0.045958 | 0.149376 | Ubxn6         |
| 1072.85 | 1273.77 | 1515.8248 | 1482.8552 | -0.353360612 | 0.04597  | 0.149386 | Sdf2          |
| 51.9286 | 33.872  | 84.260747 | 84.142276 | -0.977223738 | 0.046033 | 0.149501 | Gstm5         |
| 1625.37 | 1627.64 | 1985.7739 | 2006.0006 | -0.2951917   | 0.046042 | 0.149501 | Sp140         |
| 5300.87 | 6130.83 | 6774.7378 | 7413.0565 | -0.311357221 | 0.046066 | 0.149547 | Leng8         |
| 104.896 | 152.424 | 198.05619 | 214.62378 | -0.677873185 | 0.046096 | 0.149585 | Rgag4         |
| 0       | 0       | 7.8180075 | 4.8778131 | -5.168564457 | 0.046107 | 1        | 3300002P13Rik |
| 1045.84 | 1051.82 | 1217.8718 | 1509.6832 | -0.377654245 | 0.04614  | 0.14967  | Slc37a3       |
| 731.155 | 864.628 | 1034.583  | 1032.8769 | -0.372949547 | 0.046141 | 0.14967  | Trip4         |
| 1241.09 | 1583.96 | 1858.0798 | 1814.5465 | -0.378101551 | 0.046169 | 0.14973  | Cep170        |
| 84.1244 | 131.923 | 184.15751 | 176.82073 | -0.737794579 | 0.046222 | 0.149872 | Thtpa         |
| 2.07714 | 2.67411 | 6.0806725 | 26.827972 | -2.774111217 | 0.046319 | 0.150096 | Mamstr        |
| 2601.62 | 2586.75 | 2917.8541 | 3783.9635 | -0.368682348 | 0.046369 | 0.150229 | Mical1        |
| 3.11572 | 4.45684 | 17.37335  | 18.291799 | -2.227883972 | 0.04644  | 0.15038  | Wnt6          |
| 45.6972 | 51.6994 | 146.80481 | 62.192117 | -1.107438305 | 0.046476 | 0.15038  | Gp1ba         |

|         |         |           |           |              |          |          |               |
|---------|---------|-----------|-----------|--------------|----------|----------|---------------|
| 6525.35 | 7268.22 | 8479.0634 | 8289.8434 | -0.281742117 | 0.046485 | 0.15038  | Tcf25         |
| 1.03857 | 8.91369 | 13.89868  | 40.241958 | -2.415266723 | 0.04649  | 0.15038  | Gm8013        |
| 1253.56 | 1493.04 | 1888.4831 | 1652.3592 | -0.366620436 | 0.046672 | 0.150908 | Gpd2          |
| 570.176 | 703.29  | 782.66941 | 942.63739 | -0.436157894 | 0.04674  | 0.15102  | Rarg          |
| 99.703  | 87.3541 | 123.35078 | 203.6487  | -0.801733785 | 0.046835 | 0.151284 | Gstk1         |
| 474.628 | 583.846 | 763.55873 | 667.04094 | -0.434786652 | 0.047031 | 0.151847 | Ginm1         |
| 187.982 | 199.667 | 244.96423 | 340.22747 | -0.590397243 | 0.047047 | 0.151847 | Numbl         |
| 11.4243 | 7.13095 | 26.060025 | 32.925239 | -1.672361663 | 0.04712  | 0.152022 | Gm45745       |
| 47.7743 | 62.3958 | 92.078754 | 109.7508  | -0.868243275 | 0.047149 | 0.152054 | 2810408A11Rik |
| 171.364 | 188.079 | 255.38824 | 265.84082 | -0.534812748 | 0.047177 | 0.152113 | Fam69a        |
| 802.816 | 805.797 | 1026.765  | 1003.6101 | -0.336118227 | 0.047201 | 0.152159 | Epg5          |
| 93.4715 | 124.792 | 151.14814 | 214.62378 | -0.739133161 | 0.047224 | 0.152206 | Rbbp9         |
| 1079.08 | 1206.02 | 1359.4646 | 1568.2169 | -0.356371649 | 0.047245 | 0.152241 | Cog3          |
| 98.6644 | 69.5268 | 337.04299 | 71.947744 | -1.287041953 | 0.047369 | 0.152461 | Mfsd2b        |
| 398.812 | 446.576 | 562.89654 | 560.94851 | -0.410114254 | 0.047421 | 0.152543 | Asb7          |
| 97.6258 | 112.312 | 159.83482 | 171.94291 | -0.657869719 | 0.047424 | 0.152543 | Gm44423       |
| 74.7772 | 63.2872 | 109.4521  | 128.04259 | -0.781895203 | 0.047424 | 0.152543 | Tlcd2         |
| 71.6615 | 97.1592 | 170.25883 | 121.94533 | -0.792897978 | 0.047832 | 0.153583 | Dlgap3        |
| 149.554 | 155.99  | 189.36951 | 303.64387 | -0.685781665 | 0.047834 | 0.153583 | Rps6ka5       |
| 2.07714 | 0.89137 | 13.89868  | 9.7556262 | -3.019520634 | 0.04789  | 1        | Cib2          |
| 2.07714 | 1.78274 | 19.979352 | 7.3167197 | -2.836510823 | 0.048008 | 0.153962 | Abca13        |
| 30.1186 | 208.58  | 803.51743 | 470.70897 | -2.415583161 | 0.04814  | 0.154281 | Il24          |
| 235.756 | 262.062 | 329.22498 | 370.7138  | -0.489378324 | 0.048162 | 0.154281 | Rusc1         |
| 211.869 | 185.405 | 299.69029 | 271.93808 | -0.527246158 | 0.048165 | 0.154281 | Fnip2         |
| 24686.9 | 37742.3 | 45357.473 | 39689.546 | -0.446027238 | 0.048209 | 0.15439  | Il2ra         |
| 0       | 1.78274 | 6.0806725 | 17.072346 | -3.636452944 | 0.048234 | 1        | AC161825.1    |
| 1492.43 | 1539.39 | 2007.4906 | 1776.7434 | -0.320377054 | 0.048346 | 0.154752 | Gimap9        |
| 99.703  | 95.3764 | 166.78416 | 143.89549 | -0.673983721 | 0.048456 | 0.154966 | Fgd2          |
| 536.942 | 701.507 | 886.04084 | 792.64463 | -0.438555716 | 0.048474 | 0.154986 | Rnf125        |
| 104.896 | 157.772 | 218.90421 | 202.42924 | -0.679775192 | 0.048491 | 0.154986 | Sogal         |
| 38.4272 | 24.067  | 57.332055 | 78.04501  | -1.116115498 | 0.048574 | 0.155159 | Gm16712       |
| 76.8544 | 121.226 | 148.54214 | 192.67362 | -0.778852361 | 0.048662 | 0.155349 | Ift43         |
| 59.1986 | 20.5015 | 136.3808  | 62.192117 | -1.327297307 | 0.048725 | 0.155425 | Bcl11a        |
| 99.703  | 83.7887 | 136.3808  | 163.40674 | -0.707267601 | 0.048734 | 0.155425 | Zfp667        |
| 464.242 | 508.08  | 657.58129 | 618.26281 | -0.392081461 | 0.048833 | 0.155679 | Zfp287        |
| 2291.09 | 1978.84 | 2339.3216 | 3565.6814 | -0.467200279 | 0.048905 | 0.155816 | Dap           |
| 241.987 | 282.564 | 331.83098 | 424.36974 | -0.524336681 | 0.048925 | 0.15585  | 2610301B20Rik |
| 1.03857 | 0       | 5.212005  | 13.413986 | -4.240616686 | 0.048943 | 1        | Gm45344       |
| 1472.7  | 1094.6  | 1646.1249 | 1754.7933 | -0.406035582 | 0.048979 | 0.155991 | Gaa           |
| 274.183 | 247.8   | 331.83098 | 408.51685 | -0.502551924 | 0.049223 | 0.156583 | Gm10288       |
| 11069.1 | 12012.1 | 12739.877 | 17157.708 | -0.373145267 | 0.04924  | 0.156603 | Cd4           |
| 299.109 | 182.731 | 349.20433 | 390.22505 | -0.619264108 | 0.049269 | 0.156665 | Ada           |
| 305.34  | 65.0699 | 806.12344 | 638.99352 | -1.964848727 | 0.049415 | 0.15707  | Pygl          |
| 343.767 | 361.896 | 488.19113 | 457.29498 | -0.422528785 | 0.049469 | 0.157209 | Zdhhc24       |
| 72.7001 | 72.2009 | 107.71477 | 140.23713 | -0.771308835 | 0.049479 | 0.157209 | 9330151L19Rik |

|         |         |           |           |              |          |          |               |
|---------|---------|-----------|-----------|--------------|----------|----------|---------------|
| 2274.47 | 2447.7  | 2784.948  | 3019.3663 | -0.297204812 | 0.04955  | 0.15734  | Col4a3bp      |
| 30.1186 | 166.686 | 534.23051 | 348.76364 | -2.16457635  | 0.049561 | 0.15734  | Il1r1         |
| 2648.36 | 3191.99 | 3381.7226 | 4185.1637 | -0.37303968  | 0.049569 | 0.15734  | Gadd45g       |
| 6.23143 | 16.936  | 23.454022 | 54.875398 | -1.739657167 | 0.049724 | 0.15774  | Cbln3         |
| 10.3857 | 8.91369 | 26.928692 | 31.705785 | -1.603132834 | 0.049777 | 0.157846 | Hdac11        |
| 548.366 | 675.657 | 798.30543 | 820.69206 | -0.402368998 | 0.049841 | 0.158017 | Zufsp         |
| 251.335 | 302.174 | 346.59833 | 454.85607 | -0.530566545 | 0.049931 | 0.158272 | 1500011K16Rik |



**Supplemental Table 2. Upregulated genes in *E4bp4*-cKO Tfh cells**

| cKO1     | cKO2     | cKO_C1  | cKO_C2  | log2FoldChange | pvalue    | padj      | GENE_NAME     |
|----------|----------|---------|---------|----------------|-----------|-----------|---------------|
| 6022.681 | 5382.975 | 231.066 | 256.085 | 4.552461553    | 1.04E-155 | 1.67E-151 | Rps3a2        |
| 6311.405 | 6293.954 | 1593.14 | 1587.73 | 1.986514273    | 7.13E-48  | 1.64E-44  | Dpp4          |
| 2091.685 | 877.9981 | 45.1707 | 37.8031 | 5.155357619    | 6.95E-36  | 9.34E-33  | Pcna-ps2      |
| 551.482  | 650.6991 | 44.302  | 65.8505 | 3.465606378    | 5.22E-30  | 4.67E-27  | Gm7600        |
| 1971.21  | 1537.611 | 346.598 | 337.789 | 2.357287554    | 8.92E-30  | 7.57E-27  | Sox4          |
| 2882.038 | 2478.005 | 694.065 | 588.996 | 2.060591569    | 1.25E-28  | 1.01E-25  | Egr3          |
| 1827.887 | 1818.392 | 464.737 | 364.617 | 2.132633752    | 3.22E-27  | 2.26E-24  | Socs2         |
| 5486.778 | 5522.92  | 980.726 | 519.487 | 2.872886124    | 2.97E-24  | 1.45E-21  | Ighm          |
| 2949.546 | 2765.917 | 533.362 | 289.01  | 2.792404619    | 7.89E-23  | 3.10E-20  | Gprin3        |
| 3040.94  | 2366.584 | 752.266 | 721.916 | 1.874393976    | 4.31E-22  | 1.58E-19  | Egr2          |
| 301.186  | 277.2157 | 28.666  | 20.7307 | 3.530834629    | 6.62E-21  | 2.14E-18  | Dagla         |
| 627.2977 | 609.6962 | 81.6547 | 120.726 | 2.62318585     | 8.54E-21  | 2.65E-18  | Fgf13         |
| 3718.089 | 1990.426 | 422.172 | 292.669 | 2.994668009    | 1.06E-20  | 3.23E-18  | Pou2af1       |
| 7122.53  | 6666.546 | 2833.59 | 2575.49 | 1.349591402    | 2.72E-20  | 7.97E-18  | Bcl11b        |
| 523.4405 | 626.6322 | 79.9174 | 41.4614 | 3.224992665    | 2.99E-20  | 8.62E-18  | Igsf3         |
| 390.5032 | 270.0847 | 29.5347 | 19.5113 | 3.729892736    | 6.22E-20  | 1.67E-17  | Ighg2c        |
| 750.8879 | 451.9239 | 66.8874 | 39.0225 | 3.489287394    | 9.81E-20  | 2.55E-17  | Trim66        |
| 181.7502 | 205.9062 | 6.08067 | 2.43891 | 5.431452795    | 4.59E-18  | 9.87E-16  | Myh11         |
| 353.1146 | 618.6099 | 56.4634 | 47.5587 | 3.219279415    | 9.97E-18  | 2.04E-15  | Sspo          |
| 699.9978 | 395.7677 | 67.7561 | 53.6559 | 3.166476567    | 1.08E-17  | 2.17E-15  | Eif3j2        |
| 2262.011 | 2403.13  | 433.465 | 184.137 | 2.911700776    | 6.76E-17  | 1.27E-14  | Igkc          |
| 184.8659 | 188.0788 | 13.03   | 8.53617 | 4.082782771    | 8.69E-17  | 1.59E-14  | Fap           |
| 282.4917 | 213.9285 | 26.9287 | 19.5113 | 3.400575986    | 2.29E-16  | 3.84E-14  | Stxbp6        |
| 2308.746 | 1416.385 | 372.658 | 428.028 | 2.218786083    | 2.77E-16  | 4.60E-14  | Il18r1        |
| 3779.365 | 3626.088 | 1288.23 | 892.64  | 1.76179851     | 2.85E-16  | 4.69E-14  | Fabp5         |
| 3759.632 | 3200.014 | 1188.34 | 851.178 | 1.768899938    | 3.83E-16  | 6.12E-14  | Tmem1311      |
| 2894.501 | 2630.429 | 1150.12 | 1026.78 | 1.342556199    | 3.94E-16  | 6.23E-14  | Ptger4        |
| 2043.911 | 1569.7   | 567.24  | 451.198 | 1.824515771    | 5.98E-16  | 9.01E-14  | Syne2         |
| 258.6045 | 137.2708 | 3.47467 | 2.43891 | 6.031315366    | 2.22E-15  | 3.25E-13  | 1810009J06Rik |
| 3673.431 | 2757.895 | 1048.48 | 1109.7  | 1.575389846    | 2.57E-15  | 3.73E-13  | Adgrl1        |
| 1462.31  | 1164.127 | 423.91  | 426.809 | 1.625978299    | 2.88E-15  | 4.15E-13  | Nrp1          |
| 423.7375 | 364.5698 | 70.3621 | 39.0225 | 2.830575989    | 4.04E-15  | 5.76E-13  | Cd109         |
| 1120.62  | 1041.119 | 284.054 | 162.187 | 2.269031847    | 7.92E-15  | 1.10E-12  | Tex15         |
| 11187.5  | 7218.303 | 2637.27 | 1831.62 | 2.041493936    | 1.25E-14  | 1.71E-12  | Hivep3        |
| 451.779  | 362.787  | 92.9474 | 73.1672 | 2.285846006    | 5.28E-14  | 6.65E-12  | Rhbd13        |
| 1415.574 | 1518.001 | 526.413 | 369.494 | 1.707585688    | 1.12E-13  | 1.30E-11  | Myh10         |
| 418.5447 | 208.5803 | 30.4034 | 30.4863 | 3.363223114    | 1.32E-13  | 1.50E-11  | Map2          |
| 2843.611 | 2226.639 | 584.613 | 256.085 | 2.588406275    | 1.51E-13  | 1.69E-11  | Crtam         |
| 490.2062 | 449.2498 | 135.512 | 108.531 | 1.938264689    | 3.36E-13  | 3.61E-11  | Armex6        |
| 1611.864 | 1158.779 | 375.264 | 215.843 | 2.223591152    | 6.31E-13  | 6.61E-11  | Rai14         |
| 384.2718 | 290.5862 | 71.2307 | 53.6559 | 2.424022455    | 1.00E-12  | 1.02E-10  | Cntnap1       |
| 189.0202 | 261.171  | 33.878  | 31.7058 | 2.777503675    | 3.14E-12  | 2.93E-10  | Klhl3         |
| 245.1031 | 308.4136 | 50.3827 | 28.0474 | 2.799710114    | 3.78E-12  | 3.44E-10  | Trat1         |

|          |          |         |         |             |          |          |          |
|----------|----------|---------|---------|-------------|----------|----------|----------|
| 219.1388 | 232.6472 | 21.7167 | 3.65836 | 4.09061154  | 7.10E-12 | 6.03E-10 | Gnai1    |
| 2825.956 | 2863.076 | 1428.09 | 1258.48 | 1.081474341 | 9.00E-12 | 7.36E-10 | Smad3    |
| 1013.647 | 936.8285 | 361.366 | 409.736 | 1.340704019 | 1.02E-11 | 8.29E-10 | Delk2    |
| 236.7945 | 228.1904 | 20.848  | 2.43891 | 4.250843806 | 1.71E-11 | 1.33E-09 | Galnt14  |
| 588.8706 | 460.8376 | 157.229 | 115.848 | 1.935492128 | 2.34E-11 | 1.78E-09 | Ckmt1    |
| 549.4048 | 475.9909 | 147.673 | 90.2395 | 2.097400996 | 2.81E-11 | 2.08E-09 | Akap12   |
| 7036.328 | 3676.004 | 1488.03 | 1284.08 | 1.949743991 | 3.52E-11 | 2.55E-09 | Slc29a1  |
| 384.2718 | 351.1993 | 109.452 | 90.2395 | 1.874845694 | 4.11E-11 | 2.95E-09 | Rasgef1a |
| 8019.856 | 7633.681 | 3036.86 | 1738.94 | 1.711789129 | 5.58E-11 | 3.85E-09 | Btla     |
| 176.5573 | 114.9866 | 12.1613 | 3.65836 | 4.139459582 | 6.92E-11 | 4.61E-09 | Egr4     |
| 1547.473 | 795.1009 | 215.43  | 285.352 | 2.227753187 | 7.06E-11 | 4.67E-09 | Klf2     |
| 9434.392 | 6846.603 | 3431.24 | 3219.36 | 1.291395695 | 7.45E-11 | 4.90E-09 | Stmn1    |
| 5460.814 | 5069.214 | 2843.15 | 2659.63 | 0.935900586 | 1.01E-10 | 6.62E-09 | Chd3     |
| 1841.389 | 1398.557 | 638.471 | 640.213 | 1.340893057 | 1.12E-10 | 7.29E-09 | Inpp4a   |
| 2350.289 | 1854.938 | 916.444 | 858.495 | 1.243566971 | 1.23E-10 | 7.95E-09 | Ipcef1   |
| 500.5919 | 579.3896 | 192.844 | 176.821 | 1.54527496  | 1.24E-10 | 7.98E-09 | Bcam     |
| 1038.572 | 924.3493 | 420.435 | 415.834 | 1.23041158  | 1.42E-10 | 9.03E-09 | Tarbp1   |
| 9509.169 | 7657.748 | 4127.04 | 3498.61 | 1.170275976 | 1.53E-10 | 9.64E-09 | Uhrf1    |
| 481.8976 | 499.1665 | 97.2908 | 31.7058 | 2.908868686 | 2.05E-10 | 1.28E-08 | Igsf9b   |
| 667.8021 | 759.4461 | 266.681 | 287.791 | 1.365987222 | 2.17E-10 | 1.34E-08 | Zfp467   |
| 354.1532 | 82.00592 | 0.86867 | 1.21945 | 7.739102827 | 2.55E-10 | 1.56E-08 | Gm15247  |
| 282.4917 | 477.7736 | 55.5947 | 15.8529 | 3.386735443 | 2.64E-10 | 1.61E-08 | Ighg2b   |
| 4788.857 | 4303.528 | 2183.83 | 1620.65 | 1.255865051 | 2.67E-10 | 1.62E-08 | Ccr5     |
| 1107.118 | 950.199  | 436.071 | 346.325 | 1.391403157 | 3.01E-10 | 1.80E-08 | Them6    |
| 394.6575 | 278.107  | 84.2607 | 67.0699 | 2.145159158 | 3.16E-10 | 1.88E-08 | Mt3      |
| 6028.913 | 7328.833 | 3342.63 | 3026.68 | 1.068296734 | 3.45E-10 | 2.01E-08 | Ltb      |
| 422.699  | 255.8228 | 69.4934 | 40.242  | 2.614170818 | 3.99E-10 | 2.31E-08 | Mzb1     |
| 1087.385 | 1023.291 | 463.868 | 351.203 | 1.36903003  | 5.16E-10 | 2.93E-08 | Tpst1    |
| 862.0151 | 806.6886 | 308.377 | 191.454 | 1.733051202 | 5.30E-10 | 2.98E-08 | Mpp2     |
| 12376.67 | 10164.28 | 5613.33 | 5636.31 | 1.002601803 | 5.32E-10 | 2.98E-08 | Fyn      |
| 3070.02  | 2473.548 | 1309.08 | 1199.94 | 1.142900512 | 5.33E-10 | 2.98E-08 | Clspn    |
| 1391.687 | 1261.287 | 637.602 | 578.021 | 1.124404206 | 5.42E-10 | 3.03E-08 | Slc12a2  |
| 2131.151 | 2225.748 | 1063.25 | 817.034 | 1.210527549 | 5.85E-10 | 3.25E-08 | Axl      |
| 2227.738 | 1650.815 | 773.983 | 803.62  | 1.297670909 | 6.08E-10 | 3.36E-08 | Kif20a   |
| 10275.64 | 7364.488 | 3799.55 | 3724.21 | 1.229195    | 7.41E-10 | 4.04E-08 | Ncapd2   |
| 20469.22 | 16058.9  | 8815.24 | 8743.48 | 1.056761881 | 7.56E-10 | 4.11E-08 | Top2a    |
| 4344.348 | 4292.831 | 2443.56 | 2253.55 | 0.878337399 | 9.90E-10 | 5.25E-08 | Cnot6l   |
| 7463.181 | 5168.156 | 2650.3  | 2481.59 | 1.299154791 | 1.02E-09 | 5.35E-08 | Lmnbl    |
| 13905.45 | 9984.22  | 5362.28 | 4627.83 | 1.257560544 | 1.07E-09 | 5.58E-08 | Hmgb2    |
| 881.748  | 715.769  | 324.882 | 278.035 | 1.402787697 | 1.12E-09 | 5.84E-08 | Zfp365   |
| 400.889  | 263.8451 | 59.9381 | 20.7307 | 3.019217819 | 1.28E-09 | 6.60E-08 | Shroom3  |
| 4186.485 | 3076.113 | 1564.47 | 1564.56 | 1.214536434 | 1.32E-09 | 6.78E-08 | Ccna2    |
| 441.3933 | 427.857  | 148.542 | 160.968 | 1.491737797 | 1.37E-09 | 7.01E-08 | Arc      |
| 584.7163 | 259.3883 | 75.5741 | 58.5338 | 2.648110052 | 1.72E-09 | 8.70E-08 | Fam84a   |
| 15147.58 | 11367.62 | 6303.05 | 5822.89 | 1.128558155 | 1.89E-09 | 9.44E-08 | Mki67    |

|          |          |         |         |             |          |          |           |
|----------|----------|---------|---------|-------------|----------|----------|-----------|
| 1273.29  | 968.9177 | 467.343 | 403.639 | 1.362018065 | 2.18E-09 | 1.07E-07 | Arhgap19  |
| 1044.804 | 675.6574 | 263.206 | 284.133 | 1.6524691   | 2.21E-09 | 1.08E-07 | Zfp862-ps |
| 1094.655 | 877.1068 | 392.638 | 420.711 | 1.277921388 | 2.28E-09 | 1.12E-07 | Trib1     |
| 377.0018 | 341.3942 | 89.4728 | 39.0225 | 2.465813361 | 2.58E-09 | 1.25E-07 | Spib      |
| 1816.463 | 1189.086 | 489.06  | 559.729 | 1.51943999  | 2.62E-09 | 1.26E-07 | Pcx       |
| 405.0432 | 318.2186 | 101.634 | 58.5338 | 2.162123864 | 2.82E-09 | 1.35E-07 | Neto2     |
| 3695.241 | 2651.822 | 1340.35 | 1349.93 | 1.238093069 | 2.90E-09 | 1.38E-07 | Ephx1     |
| 5054.732 | 3167.924 | 1370.76 | 1601.14 | 1.468457137 | 3.96E-09 | 1.82E-07 | Cdc20     |
| 7158.88  | 5383.867 | 3011.67 | 2691.33 | 1.136652291 | 4.74E-09 | 2.13E-07 | Mcm2      |
| 247.1802 | 67.74402 | 8.68667 | 3.65836 | 4.629458469 | 5.30E-09 | 2.35E-07 | Iglc2     |
| 8724.008 | 6442.813 | 3517.23 | 2641.34 | 1.299676775 | 5.80E-09 | 2.55E-07 | Mcm5      |
| 984.5667 | 713.9863 | 329.225 | 256.085 | 1.533316704 | 6.47E-09 | 2.83E-07 | E2f7      |
| 2472.841 | 1666.859 | 827.84  | 799.961 | 1.34601435  | 8.36E-09 | 3.58E-07 | Ccnf      |
| 311.5717 | 181.8392 | 45.1707 | 19.5113 | 2.908104577 | 8.50E-09 | 3.63E-07 | Rpph1     |
| 7343.746 | 7814.629 | 3695.31 | 2381.59 | 1.318017213 | 9.66E-09 | 4.10E-07 | Ezh2      |
| 7627.276 | 5767.155 | 3291.38 | 2766.94 | 1.144152553 | 1.01E-08 | 4.30E-07 | Rrm2      |
| 67.50721 | 123.9002 | 0       | 0       | 8.983318098 | 1.10E-08 | 4.59E-07 | Gm38326   |
| 6082.919 | 5978.41  | 3565.01 | 3548.61 | 0.761695748 | 1.13E-08 | 4.72E-07 | Irf2bp2   |
| 1109.195 | 842.3434 | 414.354 | 384.128 | 1.287718716 | 1.38E-08 | 5.66E-07 | Ung       |
| 467.3576 | 217.494  | 53.8574 | 15.8529 | 3.273297264 | 1.44E-08 | 5.90E-07 | Cavin3    |
| 1158.008 | 800.4491 | 370.052 | 367.055 | 1.408994353 | 1.58E-08 | 6.41E-07 | Iqgap3    |
| 689.6121 | 562.4536 | 260.6   | 218.282 | 1.382861697 | 1.66E-08 | 6.67E-07 | Setbp1    |
| 2173.732 | 1946.749 | 1091.92 | 1093.85 | 0.914461082 | 1.67E-08 | 6.71E-07 | Casp4     |
| 221.2159 | 203.2321 | 57.3321 | 40.242  | 2.108797009 | 1.72E-08 | 6.87E-07 | Lonrf3    |
| 1542.28  | 1554.547 | 843.476 | 763.378 | 0.945442324 | 1.77E-08 | 7.05E-07 | Cd40lg    |
| 24359.72 | 18242.75 | 10707.2 | 8908.11 | 1.118795101 | 1.85E-08 | 7.31E-07 | Tuba1b    |
| 158.9016 | 455.4894 | 0       | 0       | 10.66433657 | 1.90E-08 | 7.45E-07 | Gm33707   |
| 1483.081 | 1115.102 | 572.452 | 440.223 | 1.356639872 | 1.94E-08 | 7.57E-07 | Hirip3    |
| 189.0202 | 161.3377 | 30.4034 | 9.75563 | 3.087532519 | 1.95E-08 | 7.60E-07 | Abi3bp    |
| 4776.395 | 4261.634 | 1807.7  | 864.592 | 1.756503363 | 2.25E-08 | 8.60E-07 | Ifih1     |
| 897.3266 | 646.2423 | 263.206 | 139.018 | 1.933338834 | 2.48E-08 | 9.42E-07 | Dnph1     |
| 6941.818 | 5586.207 | 3334.81 | 2970.59 | 0.990073047 | 2.52E-08 | 9.57E-07 | Anp32e    |
| 6984.4   | 6183.424 | 3710.95 | 3763.23 | 0.816979654 | 2.66E-08 | 9.95E-07 | Rbbp7     |
| 835.0122 | 780.839  | 389.163 | 323.155 | 1.178570662 | 2.77E-08 | 1.04E-06 | Sbk1      |
| 918.098  | 904.7392 | 438.677 | 331.691 | 1.238873347 | 3.05E-08 | 1.12E-06 | St6gal1   |
| 4458.591 | 4078.903 | 2491.34 | 2268.18 | 0.842453307 | 3.21E-08 | 1.18E-06 | Smarcc1   |
| 6067.34  | 5037.124 | 2864    | 2073.07 | 1.168579581 | 3.86E-08 | 1.40E-06 | Srm       |
| 3128.18  | 2375.497 | 1354.25 | 1195.06 | 1.109387535 | 3.94E-08 | 1.43E-06 | Ncapg2    |
| 2048.065 | 1472.541 | 780.063 | 745.086 | 1.206116776 | 3.96E-08 | 1.43E-06 | Asf1b     |
| 1249.403 | 956.4386 | 401.324 | 198.771 | 1.8728837   | 4.05E-08 | 1.46E-06 | Nfix      |
| 258.6045 | 191.6443 | 52.12   | 59.7532 | 2.011938129 | 4.32E-08 | 1.56E-06 | Ptk7      |
| 3108.447 | 2330.038 | 1205.71 | 1320.67 | 1.10630444  | 4.48E-08 | 1.60E-06 | Espl1     |
| 3615.271 | 3567.257 | 2109.12 | 1804.79 | 0.875054912 | 4.55E-08 | 1.62E-06 | Mbp       |
| 1116.465 | 919.0011 | 452.576 | 484.123 | 1.120058768 | 4.58E-08 | 1.63E-06 | Fancd2    |
| 2248.509 | 2426.306 | 1220.48 | 884.104 | 1.149681515 | 4.78E-08 | 1.69E-06 | Trerf1    |

|          |          |         |         |             |          |          |           |
|----------|----------|---------|---------|-------------|----------|----------|-----------|
| 1815.425 | 1632.987 | 941.636 | 860.934 | 0.93477108  | 5.01E-08 | 1.77E-06 | Rad51     |
| 2460.378 | 2045.691 | 1084.1  | 726.794 | 1.313069841 | 5.27E-08 | 1.85E-06 | Rcl1      |
| 427.8918 | 321.7841 | 112.927 | 130.482 | 1.625159984 | 5.30E-08 | 1.86E-06 | Cfap54    |
| 17482.29 | 12692.2  | 6908.51 | 7488.66 | 1.067559075 | 5.36E-08 | 1.88E-06 | Dgkz      |
| 2551.772 | 2207.92  | 1303    | 1135.31 | 0.963838268 | 5.44E-08 | 1.90E-06 | Ly9       |
| 1151.777 | 934.1544 | 490.797 | 387.786 | 1.244406972 | 5.48E-08 | 1.91E-06 | Slc25a13  |
| 6341.523 | 4684.142 | 2718.93 | 2110.87 | 1.190134603 | 5.59E-08 | 1.95E-06 | Pclaf     |
| 2527.885 | 2140.176 | 1209.19 | 1248.72 | 0.925352971 | 6.32E-08 | 2.18E-06 | Ankrd13b  |
| 5227.135 | 5527.377 | 2963.02 | 2164.53 | 1.067814953 | 6.53E-08 | 2.24E-06 | Arhgef3   |
| 5067.195 | 4577.178 | 2730.22 | 2162.09 | 0.978344381 | 6.77E-08 | 2.32E-06 | Dnmt3a    |
| 11812.72 | 9189.12  | 5547.31 | 5279.01 | 0.955811742 | 6.95E-08 | 2.37E-06 | Dnmt1     |
| 4508.443 | 3255.278 | 1857.21 | 1746.26 | 1.106930354 | 7.00E-08 | 2.38E-06 | Gtse1     |
| 1990.943 | 1686.47  | 974.645 | 918.248 | 0.957264265 | 7.51E-08 | 2.54E-06 | Timeless  |
| 16652.47 | 12773.31 | 7802.37 | 7027.71 | 0.988385911 | 7.64E-08 | 2.58E-06 | Igfbp4    |
| 1339.758 | 888.6946 | 453.444 | 373.153 | 1.428497512 | 7.77E-08 | 2.62E-06 | Gm9821    |
| 19346.53 | 20146.71 | 11280.5 | 12405.5 | 0.737693972 | 7.83E-08 | 2.63E-06 | Ppia      |
| 2711.713 | 2222.182 | 1144.9  | 1313.35 | 1.005661515 | 7.93E-08 | 2.64E-06 | Cenpf     |
| 1836.196 | 1189.086 | 535.968 | 623.141 | 1.384584196 | 8.09E-08 | 2.69E-06 | Cdkn2c    |
| 2245.394 | 1859.395 | 1085.83 | 991.416 | 0.981649517 | 8.21E-08 | 2.72E-06 | Rpa2      |
| 8341.814 | 6319.804 | 3816.06 | 3287.65 | 1.045003285 | 8.64E-08 | 2.84E-06 | Rrm1      |
| 3241.385 | 2480.679 | 1452.41 | 1268.23 | 1.071684373 | 9.01E-08 | 2.95E-06 | Chaf1a    |
| 5706.955 | 4610.159 | 2807.53 | 2619.39 | 0.926459196 | 9.13E-08 | 2.99E-06 | Mcm4      |
| 6269.862 | 5341.972 | 3329.6  | 2975.47 | 0.880555899 | 9.16E-08 | 2.99E-06 | Tmem173   |
| 2772.988 | 2030.538 | 1096.26 | 1135.31 | 1.105889487 | 9.73E-08 | 3.15E-06 | Foxm1     |
| 1645.099 | 1240.785 | 675.823 | 643.871 | 1.127901722 | 1.06E-07 | 3.39E-06 | Kif4      |
| 3233.076 | 2777.505 | 1624.41 | 1245.06 | 1.06538618  | 1.07E-07 | 3.40E-06 | Asap1     |
| 1302.37  | 1120.45  | 588.088 | 414.614 | 1.269454951 | 1.11E-07 | 3.53E-06 | Sulf2     |
| 1856.967 | 1364.685 | 759.215 | 664.602 | 1.176622685 | 1.13E-07 | 3.58E-06 | Ticrr     |
| 4930.103 | 3353.329 | 1919.76 | 1719.43 | 1.186092679 | 1.14E-07 | 3.61E-06 | Synpo     |
| 199.4059 | 150.6413 | 36.484  | 14.6334 | 2.746977688 | 1.25E-07 | 3.93E-06 | Ighg1     |
| 0        | 1487.694 | 0       | 0       | 25.25713582 | 1.30E-07 | 4.06E-06 | Eif2s3y   |
| 1423.883 | 1228.306 | 701.015 | 637.774 | 0.98485921  | 1.40E-07 | 4.34E-06 | Rab11fip3 |
| 0        | 1419.059 | 0       | 0       | 25.18502342 | 1.41E-07 | 4.38E-06 | Ddx3y     |
| 125.6673 | 52.59075 | 4.34334 | 0       | 5.211707751 | 1.48E-07 | 4.54E-06 | Cxcl13    |
| 8962.88  | 7758.473 | 4958.35 | 4519.29 | 0.818802166 | 1.60E-07 | 4.86E-06 | Mcm6      |
| 3122.987 | 2118.783 | 1111.03 | 1182.87 | 1.192213579 | 1.63E-07 | 4.93E-06 | Plk1      |
| 2863.344 | 2275.664 | 1360.33 | 1213.36 | 0.996742096 | 1.69E-07 | 5.07E-06 | Tk1       |
| 214.9845 | 114.0952 | 23.454  | 29.2669 | 2.647717086 | 1.76E-07 | 5.29E-06 | St5       |
| 2466.609 | 1805.913 | 1039.79 | 919.468 | 1.123723793 | 1.77E-07 | 5.31E-06 | Birc5     |
| 1005.338 | 730.0309 | 355.285 | 370.714 | 1.256998649 | 1.79E-07 | 5.35E-06 | Ankle1    |
| 590.9477 | 466.1858 | 157.229 | 219.502 | 1.493323198 | 1.88E-07 | 5.59E-06 | Zfp831    |
| 2047.026 | 1396.775 | 761.821 | 715.819 | 1.21986137  | 1.98E-07 | 5.88E-06 | Cdca7     |
| 2130.112 | 1891.484 | 1117.98 | 1112.14 | 0.850355841 | 2.04E-07 | 6.04E-06 | Kntc1     |
| 5978.023 | 5236.791 | 3189.75 | 3315.69 | 0.785708276 | 2.09E-07 | 6.19E-06 | Sun2      |
| 169.2873 | 177.3824 | 31.272  | 7.31672 | 3.128024029 | 2.13E-07 | 6.28E-06 | Jchain    |

|          |          |         |         |             |          |          |               |
|----------|----------|---------|---------|-------------|----------|----------|---------------|
| 14815.24 | 12657.44 | 8037.78 | 7961.81 | 0.779892374 | 2.24E-07 | 6.59E-06 | Nup210        |
| 5180.399 | 3982.635 | 2442.69 | 2132.82 | 1.00130745  | 2.28E-07 | 6.67E-06 | Lig1          |
| 89.31723 | 81.11455 | 9.55534 | 2.43891 | 3.758497955 | 2.40E-07 | 7.00E-06 | Mpzl2         |
| 453.8561 | 451.9239 | 200.662 | 154.871 | 1.34387646  | 2.51E-07 | 7.29E-06 | Rasal1        |
| 5419.271 | 4366.815 | 2730.22 | 2410.86 | 0.928121316 | 2.68E-07 | 7.73E-06 | Dek           |
| 162.0173 | 167.5773 | 44.302  | 37.8031 | 1.999446677 | 2.75E-07 | 7.92E-06 | Map1a         |
| 860.9765 | 572.2587 | 279.711 | 262.182 | 1.401530768 | 3.22E-07 | 9.11E-06 | AC153546.1    |
| 5557.401 | 4347.205 | 2513.06 | 2690.11 | 0.928749841 | 3.23E-07 | 9.13E-06 | Pold1         |
| 2419.874 | 1654.38  | 792.225 | 951.174 | 1.225220269 | 3.25E-07 | 9.15E-06 | Kif18b        |
| 661.5706 | 98.05055 | 2.606   | 2.43891 | 7.231188587 | 3.35E-07 | 9.42E-06 | G530011O06Rik |
| 1967.056 | 1534.045 | 836.527 | 896.298 | 1.01480227  | 3.38E-07 | 9.47E-06 | Aurka         |
| 666.7635 | 318.2186 | 127.694 | 120.726 | 1.985468847 | 3.44E-07 | 9.61E-06 | Tox           |
| 3327.586 | 2581.404 | 1569.68 | 1434.08 | 0.975455757 | 3.59E-07 | 9.97E-06 | Rcc1          |
| 22399.93 | 20718.97 | 12995.3 | 10088.5 | 0.901243778 | 3.63E-07 | 1.01E-05 | Mbnl1         |
| 1037.534 | 852.1484 | 461.262 | 343.886 | 1.227235886 | 3.66E-07 | 1.01E-05 | Exo1          |
| 1763.496 | 1494.825 | 879.96  | 704.844 | 1.037824172 | 3.73E-07 | 1.03E-05 | Aplar         |
| 2489.458 | 1805.913 | 1017.21 | 674.358 | 1.342411614 | 4.05E-07 | 1.12E-05 | Tcf19         |
| 2272.396 | 1816.609 | 1066.72 | 797.522 | 1.131301333 | 4.08E-07 | 1.12E-05 | Ncoal         |
| 3321.355 | 2282.795 | 1337.75 | 1206.04 | 1.138807772 | 4.28E-07 | 1.17E-05 | Mybl2         |
| 0        | 852.1484 | 0       | 0       | 24.18606835 | 4.31E-07 | 1.18E-05 | Kdm5d         |
| 3865.567 | 2748.981 | 1630.49 | 1521.88 | 1.068697457 | 4.37E-07 | 1.19E-05 | Mast2         |
| 0        | 648.025  | 0       | 0       | 24.12540801 | 4.61E-07 | 1.25E-05 | Uty           |
| 212.9073 | 141.7276 | 38.2214 | 42.6809 | 2.134085197 | 4.74E-07 | 1.28E-05 | Rhov          |
| 1166.317 | 1231.871 | 605.461 | 398.761 | 1.252554141 | 4.95E-07 | 1.33E-05 | Gm10241       |
| 903.558  | 623.0667 | 280.58  | 324.375 | 1.336398774 | 5.04E-07 | 1.35E-05 | Mxd3          |
| 1530.856 | 1183.738 | 668.005 | 656.066 | 1.035088508 | 5.07E-07 | 1.36E-05 | Cdca5         |
| 3657.852 | 2249.815 | 1306.48 | 998.732 | 1.356616181 | 5.12E-07 | 1.37E-05 | Epop          |
| 891.0951 | 689.028  | 313.589 | 373.153 | 1.203796819 | 5.22E-07 | 1.38E-05 | Cenpm         |
| 616.912  | 249.5832 | 91.2101 | 93.8979 | 2.226071035 | 5.40E-07 | 1.43E-05 | Sptbn2        |
| 1912.012 | 1518.892 | 907.758 | 751.183 | 1.046636924 | 5.60E-07 | 1.48E-05 | Mcm10         |
| 2174.771 | 1803.239 | 1098    | 1025.56 | 0.904734123 | 5.76E-07 | 1.52E-05 | Nempl         |
| 3317.2   | 2658.953 | 1660.02 | 1424.32 | 0.953319563 | 6.02E-07 | 1.58E-05 | Atad2         |
| 6945.972 | 5372.279 | 3419.94 | 2901.08 | 0.962080286 | 6.56E-07 | 1.71E-05 | Mcm7          |
| 3181.147 | 2295.274 | 1388.13 | 1227.99 | 1.064986075 | 6.70E-07 | 1.75E-05 | Abhd17c       |
| 333.3817 | 361.8957 | 145.067 | 107.312 | 1.455606221 | 7.65E-07 | 1.96E-05 | Megf11        |
| 1034.418 | 918.1097 | 519.463 | 414.614 | 1.060763864 | 7.75E-07 | 1.98E-05 | Xxylt1        |
| 3734.706 | 2767.7   | 1587.06 | 1688.94 | 0.989031628 | 7.79E-07 | 1.99E-05 | Racgap1       |
| 199.4059 | 179.1651 | 59.0694 | 41.4614 | 1.901420964 | 7.81E-07 | 1.99E-05 | Clgn          |
| 1169.433 | 946.6335 | 528.15  | 380.469 | 1.216242659 | 7.95E-07 | 2.02E-05 | Grwd1         |
| 2246.432 | 1708.754 | 989.412 | 1006.05 | 0.986746529 | 8.29E-07 | 2.10E-05 | Cdt1          |
| 1418.69  | 1066.968 | 602.855 | 585.338 | 1.064033872 | 8.50E-07 | 2.14E-05 | Ndc80         |
| 83.08579 | 69.52676 | 9.55534 | 6.09727 | 3.258922502 | 8.71E-07 | 2.20E-05 | Krt17         |
| 949.2552 | 742.5101 | 413.486 | 349.983 | 1.145233296 | 8.82E-07 | 2.22E-05 | Shebp1        |
| 52491.53 | 41939.79 | 26431.8 | 27306   | 0.813320077 | 9.36E-07 | 2.34E-05 | Tubb5         |
| 4143.904 | 3375.613 | 1989.25 | 2155.99 | 0.859316261 | 9.55E-07 | 2.39E-05 | E2f2          |

|          |          |         |         |             |          |          |         |
|----------|----------|---------|---------|-------------|----------|----------|---------|
| 873.4394 | 730.9223 | 383.951 | 402.42  | 1.028833008 | 9.67E-07 | 2.41E-05 | Pbk     |
| 115.2815 | 62.39581 | 0.86867 | 0       | 7.447615235 | 9.84E-07 | 2.44E-05 | Gm2663  |
| 9512.285 | 7761.147 | 5097.34 | 4353.45 | 0.86968888  | 9.97E-07 | 2.46E-05 | Cad     |
| 294.9546 | 172.0342 | 62.5441 | 36.5836 | 2.222455156 | 1.01E-06 | 2.49E-05 | Exph5   |
| 2378.331 | 2222.182 | 1296.05 | 920.687 | 1.051568311 | 1.01E-06 | 2.49E-05 | Grap    |
| 1347.028 | 1261.287 | 735.761 | 580.46  | 0.984308624 | 1.05E-06 | 2.57E-05 | Ppfibp1 |
| 1248.364 | 1252.373 | 725.337 | 684.113 | 0.826488541 | 1.07E-06 | 2.60E-05 | Cep164  |
| 2213.198 | 1685.578 | 1024.16 | 928.004 | 0.996948574 | 1.08E-06 | 2.62E-05 | Dck     |
| 5999.833 | 5937.407 | 3868.18 | 3502.27 | 0.695289582 | 1.10E-06 | 2.68E-05 | Hipk3   |
| 3360.82  | 2383.52  | 1276.94 | 1465.78 | 1.066801514 | 1.15E-06 | 2.79E-05 | Bub1b   |
| 186.943  | 171.1428 | 50.3827 | 24.3891 | 2.239119015 | 1.20E-06 | 2.87E-05 | Ogdhl   |
| 8659.617 | 6662.981 | 4331.18 | 3732.75 | 0.925738817 | 1.25E-06 | 2.99E-05 | Mcm3    |
| 4494.941 | 3346.198 | 2103.91 | 1627.97 | 1.070256245 | 1.26E-06 | 3.00E-05 | Mapre2  |
| 1085.308 | 838.7779 | 469.08  | 335.35  | 1.254524833 | 1.26E-06 | 3.01E-05 | Gatm    |
| 1772.843 | 1583.071 | 886.91  | 579.24  | 1.192099619 | 1.27E-06 | 3.01E-05 | Crip2   |
| 1614.98  | 1136.495 | 666.268 | 557.29  | 1.167340538 | 1.30E-06 | 3.08E-05 | Shmt1   |
| 3967.347 | 3411.268 | 2215.1  | 2071.85 | 0.78291292  | 1.33E-06 | 3.13E-05 | Gart    |
| 73.73864 | 51.69938 | 1.73733 | 0       | 5.984016991 | 1.34E-06 | 3.16E-05 | Ccl1    |
| 50.89005 | 63.28718 | 3.47467 | 1.21945 | 4.529151558 | 1.39E-06 | 3.25E-05 | Pard3   |
| 3281.889 | 2578.73  | 1638.31 | 1397.49 | 0.948034047 | 1.41E-06 | 3.31E-05 | Mthfd1  |
| 9904.865 | 7143.428 | 4526.63 | 3291.3  | 1.124300646 | 1.43E-06 | 3.34E-05 | Zfpm1   |
| 7515.11  | 5819.746 | 3525.05 | 3748.6  | 0.874456191 | 1.44E-06 | 3.37E-05 | Rilpl2  |
| 2497.767 | 2167.809 | 1321.24 | 971.904 | 1.023043956 | 1.46E-06 | 3.40E-05 | Utp20   |
| 912.9052 | 747.8583 | 422.172 | 387.786 | 1.0341765   | 1.48E-06 | 3.44E-05 | Esco2   |
| 3580.998 | 2504.746 | 1455.02 | 1508.46 | 1.037998026 | 1.48E-06 | 3.44E-05 | Aurkb   |
| 1907.858 | 1443.126 | 879.092 | 704.844 | 1.079282188 | 1.61E-06 | 3.71E-05 | Tyms    |
| 981.4509 | 755.8806 | 429.99  | 374.372 | 1.108679395 | 1.66E-06 | 3.82E-05 | Naf1    |
| 1476.85  | 1549.199 | 886.91  | 882.884 | 0.773939765 | 1.68E-06 | 3.85E-05 | Ddx11   |
| 2868.537 | 2401.347 | 1544.49 | 1331.64 | 0.87261459  | 1.83E-06 | 4.15E-05 | Pole    |
| 3068.981 | 2683.911 | 1739.94 | 1490.17 | 0.831714317 | 1.90E-06 | 4.29E-05 | Paxip1  |
| 2480.111 | 2391.542 | 1437.64 | 1525.54 | 0.717648626 | 1.93E-06 | 4.36E-05 | Slc4a7  |
| 522.4019 | 434.0965 | 217.167 | 208.527 | 1.166403994 | 1.94E-06 | 4.36E-05 | Cenpn   |
| 1345.99  | 1247.916 | 755.741 | 638.994 | 0.893197918 | 1.96E-06 | 4.40E-05 | Spr     |
| 6338.407 | 4661.858 | 2916.99 | 2873.03 | 0.925700529 | 2.07E-06 | 4.60E-05 | Tmc6    |
| 1276.406 | 983.1796 | 556.816 | 565.826 | 1.008747154 | 2.09E-06 | 4.64E-05 | Chtf18  |
| 4787.819 | 3610.934 | 2216.84 | 2269.4  | 0.904538574 | 2.13E-06 | 4.71E-05 | Smc2    |
| 16614.04 | 12028.13 | 7869.26 | 6971.61 | 0.948396269 | 2.22E-06 | 4.90E-05 | Lat     |
| 4624.763 | 3189.317 | 1731.25 | 2018.2  | 1.059613997 | 2.28E-06 | 5.02E-05 | Kif11   |
| 923.2909 | 1028.639 | 471.686 | 547.535 | 0.939648865 | 2.28E-06 | 5.02E-05 | Whrn    |
| 2459.339 | 1795.216 | 1024.16 | 1104.82 | 0.99889037  | 2.37E-06 | 5.17E-05 | Pold2   |
| 256.5274 | 266.5192 | 103.371 | 73.1672 | 1.558513638 | 2.39E-06 | 5.20E-05 | Ccdc141 |
| 1951.478 | 1452.04  | 867.799 | 848.739 | 0.986928484 | 2.39E-06 | 5.20E-05 | Rfc5    |
| 2227.738 | 2634.886 | 1160.54 | 575.582 | 1.483901011 | 2.41E-06 | 5.23E-05 | Psd     |
| 4896.869 | 5727.935 | 2552.15 | 1201.16 | 1.500245261 | 2.55E-06 | 5.51E-05 | Cd74    |
| 361.4232 | 278.107  | 103.371 | 41.4614 | 2.128021057 | 2.59E-06 | 5.54E-05 | Tns4    |

|          |          |         |         |             |          |          |               |
|----------|----------|---------|---------|-------------|----------|----------|---------------|
| 3660.968 | 2996.781 | 1956.24 | 1793.82 | 0.827519036 | 2.65E-06 | 5.64E-05 | Dut           |
| 410.2361 | 287.0207 | 127.694 | 125.604 | 1.459286616 | 2.67E-06 | 5.67E-05 | Apitd1        |
| 6000.871 | 5953.451 | 3591.94 | 2524.27 | 0.966113897 | 2.71E-06 | 5.76E-05 | Ksr1          |
| 2389.755 | 1694.492 | 952.928 | 1040.19 | 1.035126099 | 2.80E-06 | 5.92E-05 | Ccnb2         |
| 10995.37 | 9909.345 | 6727.83 | 5760.7  | 0.742922274 | 2.84E-06 | 5.99E-05 | Hspd1         |
| 1145.545 | 800.4491 | 443.02  | 439.003 | 1.140833204 | 2.85E-06 | 6.00E-05 | BC030867      |
| 6673.866 | 6412.506 | 4093.16 | 3131.56 | 0.856455298 | 2.87E-06 | 6.04E-05 | Foxp4         |
| 2200.735 | 1819.283 | 1071.07 | 1158.48 | 0.850683154 | 2.90E-06 | 6.09E-05 | H2afv         |
| 845.3979 | 747.8583 | 432.596 | 367.055 | 0.991836284 | 3.06E-06 | 6.38E-05 | Lrrc28        |
| 315.726  | 162.2291 | 62.5441 | 31.7058 | 2.327580483 | 3.16E-06 | 6.57E-05 | Itga9         |
| 3100.139 | 2223.073 | 1299.53 | 1386.52 | 0.986785769 | 3.18E-06 | 6.60E-05 | Ccnb1         |
| 12311.24 | 10815.87 | 7414.95 | 6580.17 | 0.724425114 | 3.24E-06 | 6.69E-05 | Rcc2          |
| 2769.873 | 2289.035 | 1408.98 | 1469.44 | 0.813522198 | 3.25E-06 | 6.71E-05 | Ints7         |
| 1694.95  | 1230.98  | 748.791 | 670.699 | 1.04223848  | 3.33E-06 | 6.86E-05 | Gm10282       |
| 6811.996 | 6772.619 | 4223.46 | 3118.14 | 0.887218306 | 3.66E-06 | 7.47E-05 | Nfatc2        |
| 115.2815 | 98.05055 | 24.3227 | 15.8529 | 2.390610348 | 3.92E-06 | 7.98E-05 | Pcdhgc4       |
| 2085.453 | 1481.455 | 894.728 | 585.338 | 1.266785455 | 3.96E-06 | 8.05E-05 | Cltb          |
| 2741.831 | 2351.431 | 1356.86 | 1547.49 | 0.810920467 | 4.03E-06 | 8.15E-05 | Cenpe         |
| 93.47152 | 186.2961 | 28.666  | 17.0723 | 2.59861794  | 4.13E-06 | 8.34E-05 | Pkdcc         |
| 2162.308 | 1933.379 | 1238.72 | 1204.82 | 0.744673529 | 4.17E-06 | 8.41E-05 | Usp10         |
| 1519.431 | 1123.125 | 639.339 | 675.577 | 1.006881424 | 4.22E-06 | 8.49E-05 | Epb4112       |
| 1532.933 | 1215.827 | 758.347 | 645.091 | 0.968048578 | 4.24E-06 | 8.50E-05 | Pola1         |
| 172.403  | 113.2038 | 26.06   | 4.87781 | 3.16419368  | 4.38E-06 | 8.76E-05 | Bank1         |
| 2640.051 | 1993.1   | 1177.04 | 1270.67 | 0.920627781 | 4.49E-06 | 8.94E-05 | Kif15         |
| 327.1503 | 248.6919 | 108.583 | 104.873 | 1.429751951 | 4.55E-06 | 9.03E-05 | Bdh2          |
| 88.27866 | 37.43748 | 3.47467 | 0       | 5.027466662 | 4.56E-06 | 9.05E-05 | Igkv1-135     |
| 17003.51 | 14329.64 | 9888.04 | 9070.29 | 0.724714158 | 4.84E-06 | 9.54E-05 | Tle3          |
| 798.6622 | 801.3404 | 450.838 | 367.055 | 0.965240895 | 4.88E-06 | 9.61E-05 | Apex1         |
| 135.0144 | 126.5744 | 35.6154 | 19.5113 | 2.22590291  | 4.95E-06 | 9.71E-05 | AC133947.2    |
| 2109.341 | 1844.242 | 1184.86 | 948.735 | 0.888251298 | 5.04E-06 | 9.88E-05 | Umps          |
| 2171.655 | 2212.377 | 1321.24 | 1395.05 | 0.691110244 | 5.10E-06 | 9.98E-05 | Kcna3         |
| 1254.595 | 893.1514 | 535.968 | 459.734 | 1.107094919 | 5.15E-06 | 0.000101 | Pmfl          |
| 1249.403 | 941.2853 | 553.341 | 542.657 | 0.998342322 | 5.16E-06 | 0.000101 | Melk          |
| 1889.163 | 1627.639 | 1049.35 | 954.832 | 0.810178584 | 5.18E-06 | 0.000101 | Prim1         |
| 1481.004 | 1127.581 | 698.409 | 549.973 | 1.06096149  | 5.18E-06 | 0.000101 | Tjp2          |
| 212.9073 | 101.616  | 33.0094 | 14.6334 | 2.699860288 | 5.22E-06 | 0.000101 | 2010300C02Rik |
| 2589.161 | 2165.134 | 1395.08 | 1363.35 | 0.784955681 | 5.22E-06 | 0.000101 | Pmm1          |
| 4347.464 | 3766.924 | 2533.9  | 2127.95 | 0.798817162 | 5.22E-06 | 0.000101 | Lmf2          |
| 1102.964 | 844.1261 | 507.302 | 399.981 | 1.098866077 | 5.27E-06 | 0.000102 | Larp7         |
| 3282.927 | 3191.991 | 2089.15 | 1760.89 | 0.749103612 | 5.44E-06 | 0.000105 | Polr1a        |
| 3971.501 | 3619.848 | 2325.42 | 1719.43 | 0.907229287 | 5.49E-06 | 0.000105 | Ecel          |
| 2166.462 | 1574.157 | 972.039 | 935.321 | 0.971054564 | 5.49E-06 | 0.000105 | Kif22         |
| 1380.263 | 1091.927 | 679.298 | 559.729 | 0.994461868 | 5.57E-06 | 0.000106 | Exosc2        |
| 721.8078 | 551.7572 | 305.771 | 210.965 | 1.296366691 | 5.70E-06 | 0.000108 | Gm3756        |
| 62.31435 | 50.80801 | 5.212   | 1.21945 | 4.051424266 | 5.72E-06 | 0.000109 | A230065H16Rik |

|          |          |         |         |             |          |          |         |
|----------|----------|---------|---------|-------------|----------|----------|---------|
| 2229.815 | 1842.459 | 1191.81 | 947.515 | 0.927100746 | 5.78E-06 | 0.000109 | Wdhd1   |
| 178.6345 | 138.1621 | 37.3527 | 48.7781 | 1.886302813 | 5.84E-06 | 0.00011  | Thrb    |
| 1213.053 | 861.9535 | 519.463 | 425.589 | 1.132325875 | 5.85E-06 | 0.00011  | Dna2    |
| 558.752  | 353.8734 | 142.461 | 45.1198 | 2.271016554 | 5.97E-06 | 0.000112 | Lhx2    |
| 1835.157 | 1509.087 | 967.696 | 884.104 | 0.851671273 | 6.12E-06 | 0.000115 | Figl1   |
| 2096.878 | 1660.62  | 855.637 | 1071.9  | 0.964041492 | 6.17E-06 | 0.000115 | Aspm    |
| 243.0259 | 256.7142 | 86.8667 | 103.654 | 1.396261573 | 6.22E-06 | 0.000116 | Ncald   |
| 1391.687 | 1213.153 | 734.893 | 751.183 | 0.809553274 | 6.25E-06 | 0.000117 | Slc19a1 |
| 1233.824 | 828.0815 | 487.322 | 440.223 | 1.150959917 | 6.47E-06 | 0.000121 | Spc24   |
| 3285.005 | 3008.369 | 2022.26 | 1791.38 | 0.721899378 | 6.50E-06 | 0.000121 | Sacs    |
| 4698.502 | 3380.07  | 1971.01 | 2225.5  | 0.9450503   | 6.50E-06 | 0.000121 | Incenp  |
| 1284.714 | 1140.061 | 705.358 | 556.071 | 0.940317399 | 6.58E-06 | 0.000122 | Mettl16 |
| 390.5032 | 336.9374 | 165.915 | 119.506 | 1.342845812 | 6.71E-06 | 0.000124 | Robo3   |
| 3934.112 | 3725.921 | 2484.39 | 2075.51 | 0.747547307 | 6.80E-06 | 0.000125 | Hsph1   |
| 1730.262 | 1862.961 | 1035.45 | 1123.12 | 0.736104148 | 6.86E-06 | 0.000126 | Dst     |
| 2018.985 | 1717.667 | 1122.32 | 1001.17 | 0.81416475  | 6.96E-06 | 0.000127 | Rrp12   |
| 1381.301 | 1008.138 | 601.987 | 585.338 | 1.008129571 | 6.98E-06 | 0.000127 | Nuf2    |
| 880.7094 | 788.8613 | 457.788 | 456.076 | 0.868969076 | 7.09E-06 | 0.000129 | Ahi1    |
| 1503.853 | 1125.799 | 648.895 | 693.869 | 0.969691506 | 7.16E-06 | 0.00013  | Fanca   |
| 5502.357 | 5498.853 | 3692.71 | 3287.65 | 0.655883989 | 7.47E-06 | 0.000135 | Tcf3    |
| 7683.359 | 6424.094 | 4317.28 | 4292.48 | 0.712288636 | 7.51E-06 | 0.000136 | Tmpo    |
| 71.6615  | 104.2901 | 15.636  | 6.09727 | 2.979914597 | 7.51E-06 | 0.000136 | Derl3   |
| 2131.151 | 2133.937 | 1296.05 | 1369.45 | 0.6786382   | 7.84E-06 | 0.000141 | Bcl10   |
| 895.2494 | 824.516  | 489.928 | 390.225 | 0.963322535 | 7.91E-06 | 0.000142 | Fancm   |
| 10480.23 | 9069.676 | 6218.79 | 6107.02 | 0.665370687 | 8.09E-06 | 0.000145 | Hcfc1   |
| 3686.932 | 2936.168 | 1962.32 | 1553.58 | 0.912603109 | 8.11E-06 | 0.000146 | Bbc3    |
| 809.0479 | 731.8137 | 365.709 | 189.015 | 1.468334328 | 8.12E-06 | 0.000146 | Ryk     |
| 1611.864 | 1548.307 | 931.212 | 986.538 | 0.721074065 | 8.22E-06 | 0.000147 | Msh2    |
| 12165.84 | 9114.245 | 6249.19 | 5181.46 | 0.89630985  | 8.35E-06 | 0.000149 | Tubb4b  |
| 129.8216 | 53.48212 | 10.424  | 10.9751 | 3.09826391  | 8.41E-06 | 0.00015  | F3      |
| 541.0962 | 474.2081 | 252.782 | 247.549 | 1.019982658 | 8.47E-06 | 0.000151 | Hectd2  |
| 2116.611 | 1641.901 | 1070.2  | 878.006 | 0.946521767 | 8.65E-06 | 0.000154 | Tnk2    |
| 4575.95  | 4350.77  | 2915.25 | 2390.13 | 0.749945132 | 8.76E-06 | 0.000155 | Txlna   |
| 294.9546 | 162.2291 | 68.6247 | 42.6809 | 2.027020718 | 8.96E-06 | 0.000158 | Pld4    |
| 126.7058 | 136.3794 | 38.2214 | 21.9502 | 2.110457947 | 9.23E-06 | 0.000162 | Cdk5r1  |
| 3061.711 | 2632.212 | 1763.4  | 1671.87 | 0.728482502 | 9.24E-06 | 0.000162 | Rasa1   |
| 154.7473 | 113.2038 | 32.1407 | 10.9751 | 2.604856596 | 9.36E-06 | 0.000164 | Adamts3 |
| 2804.146 | 2185.636 | 1453.28 | 1270.67 | 0.872328879 | 9.50E-06 | 0.000166 | Nol6    |
| 1850.736 | 1856.721 | 1180.52 | 1123.12 | 0.686058956 | 9.53E-06 | 0.000166 | Usp36   |
| 3557.111 | 3379.179 | 2282.86 | 2166.97 | 0.640044077 | 9.64E-06 | 0.000168 | Adss    |
| 104.8958 | 62.39581 | 13.8987 | 7.31672 | 2.949272524 | 9.68E-06 | 0.000169 | Scg2    |
| 1969.133 | 1430.647 | 852.163 | 899.957 | 0.956239338 | 9.79E-06 | 0.00017  | Pkmyt1  |
| 3411.71  | 2313.102 | 1431.56 | 806.059 | 1.353711891 | 9.98E-06 | 0.000173 | Hmgn2   |
| 1414.536 | 1048.25  | 619.36  | 638.994 | 0.968453687 | 1.00E-05 | 0.000173 | Haus4   |
| 759.1964 | 640.0027 | 358.76  | 368.275 | 0.944296742 | 1.00E-05 | 0.000173 | Rbm19   |



|          |          |         |         |             |          |          |               |
|----------|----------|---------|---------|-------------|----------|----------|---------------|
| 817.3565 | 521.4507 | 298.822 | 219.502 | 1.365083483 | 1.01E-05 | 0.000174 | Gm37416       |
| 4313.191 | 3399.68  | 2301.97 | 1830.4  | 0.899440587 | 1.04E-05 | 0.000179 | Alcam         |
| 2706.52  | 2326.472 | 1569.68 | 1399.93 | 0.760246769 | 1.11E-05 | 0.000189 | Ipo9          |
| 627.2977 | 374.3748 | 197.188 | 175.601 | 1.423375542 | 1.11E-05 | 0.00019  | Tacc2         |
| 878.6323 | 722.9    | 436.071 | 391.445 | 0.950583076 | 1.13E-05 | 0.000192 | Spdl1         |
| 812.1636 | 601.6738 | 355.285 | 275.596 | 1.160564497 | 1.13E-05 | 0.000192 | Gen1          |
| 46.73576 | 48.13391 | 2.606   | 0       | 5.02013761  | 1.16E-05 | 0.000197 | Slc25a48      |
| 1596.286 | 1337.944 | 827.84  | 853.617 | 0.803148416 | 1.19E-05 | 0.000202 | Plk4          |
| 1228.631 | 764.7943 | 452.576 | 268.28  | 1.463727938 | 1.21E-05 | 0.000204 | Hlx           |
| 5462.891 | 4363.25  | 2974.32 | 2791.33 | 0.768791901 | 1.22E-05 | 0.000206 | Rpa1          |
| 264.836  | 165.7946 | 49.514  | 9.75563 | 2.83479599  | 1.23E-05 | 0.000208 | Six1          |
| 848.5137 | 707.7467 | 428.253 | 349.983 | 0.996756794 | 1.24E-05 | 0.000208 | Nme4          |
| 2884.116 | 2143.742 | 1422.01 | 1259.7  | 0.905941384 | 1.24E-05 | 0.000208 | Akr1b3        |
| 10378.45 | 6748.552 | 4153.1  | 4449.79 | 0.993355673 | 1.26E-05 | 0.000211 | Nfatc1        |
| 166.1716 | 98.05055 | 26.9287 | 31.7058 | 2.175246221 | 1.27E-05 | 0.000212 | Scel          |
| 1947.323 | 1952.097 | 1262.17 | 1132.87 | 0.70230913  | 1.27E-05 | 0.000212 | Slain1        |
| 370.7704 | 313.7618 | 148.542 | 153.651 | 1.179626922 | 1.27E-05 | 0.000212 | Il1rap        |
| 9453.086 | 8458.197 | 5966.88 | 5419.25 | 0.653332418 | 1.29E-05 | 0.000214 | Sf3b3         |
| 1660.677 | 1244.351 | 775.72  | 758.5   | 0.920378143 | 1.29E-05 | 0.000215 | C330027C09Rik |
| 4804.436 | 4170.714 | 2856.18 | 2275.5  | 0.805730036 | 1.35E-05 | 0.000224 | Nolc1         |
| 1472.696 | 1190.869 | 768.771 | 621.921 | 0.935471895 | 1.36E-05 | 0.000225 | Ifrd2         |
| 470.4733 | 384.1799 | 207.612 | 176.821 | 1.148836421 | 1.39E-05 | 0.000228 | Gm45902       |
| 2144.652 | 1895.05  | 1221.35 | 1246.28 | 0.711026567 | 1.40E-05 | 0.00023  | Wdr90         |
| 3279.812 | 2591.209 | 1620.06 | 1742.6  | 0.804076783 | 1.40E-05 | 0.00023  | Pfas          |
| 14236.75 | 10615.31 | 7303.76 | 6750.89 | 0.822163348 | 1.43E-05 | 0.000233 | Ptp4a3        |
| 3687.971 | 2611.71  | 1249.14 | 1743.82 | 1.074451063 | 1.43E-05 | 0.000233 | Itm2a         |
| 1634.713 | 1140.952 | 668.874 | 710.941 | 1.008249186 | 1.43E-05 | 0.000234 | Kif2c         |
| 5756.807 | 4478.236 | 2816.22 | 3073.02 | 0.797432069 | 1.46E-05 | 0.000238 | Tcof1         |
| 1724.03  | 1333.488 | 859.981 | 796.303 | 0.883380078 | 1.47E-05 | 0.000238 | Irf2bp1       |
| 4023.43  | 3120.682 | 2037.89 | 2065.75 | 0.799667113 | 1.49E-05 | 0.000241 | Usp1          |
| 202.5216 | 207.6889 | 76.4427 | 41.4614 | 1.78459057  | 1.49E-05 | 0.000242 | Arhgap32      |
| 2509.191 | 1700.731 | 1038.06 | 1074.34 | 0.994687438 | 1.50E-05 | 0.000242 | Cdca3         |
| 1715.722 | 1251.482 | 802.649 | 571.924 | 1.107830049 | 1.52E-05 | 0.000247 | Id3           |
| 746.7336 | 643.5682 | 384.82  | 308.522 | 1.000301219 | 1.60E-05 | 0.000256 | Rrp15         |
| 1043.765 | 903.8478 | 551.604 | 547.535 | 0.824781214 | 1.60E-05 | 0.000256 | Bcl9          |
| 5374.612 | 4233.11  | 2936.1  | 2605.97 | 0.793276301 | 1.67E-05 | 0.000265 | Fbl           |
| 8409.321 | 8072.235 | 5609.85 | 4758.31 | 0.668325232 | 1.70E-05 | 0.000271 | Casp3         |
| 1294.061 | 1194.434 | 727.075 | 502.415 | 1.014325648 | 1.70E-05 | 0.000271 | Tnfrsf13b     |
| 281.4531 | 267.4106 | 114.664 | 120.726 | 1.222455463 | 1.71E-05 | 0.000272 | D630045J12Rik |
| 1831.003 | 1536.72  | 1013.73 | 946.296 | 0.779989894 | 1.71E-05 | 0.000272 | Cdc45         |
| 49.85148 | 79.33181 | 7.81801 | 1.21945 | 3.758824187 | 1.72E-05 | 0.000273 | Pdzrn3        |
| 1821.656 | 1252.373 | 812.204 | 601.19  | 1.118953513 | 1.75E-05 | 0.000276 | E2f8          |
| 6419.416 | 5785.874 | 4061.89 | 3849.81 | 0.625190393 | 1.81E-05 | 0.000284 | Ubp2          |
| 2335.749 | 2480.679 | 1579.24 | 1384.08 | 0.699988379 | 1.81E-05 | 0.000285 | Aheyl2        |
| 91.39437 | 97.15918 | 19.1107 | 4.87781 | 2.929151068 | 1.82E-05 | 0.000286 | Stra6         |

|          |          |         |         |             |          |          |         |
|----------|----------|---------|---------|-------------|----------|----------|---------|
| 464.2419 | 331.5891 | 173.733 | 159.748 | 1.252236919 | 1.83E-05 | 0.000288 | Kif18a  |
| 100.7415 | 44.56843 | 6.94934 | 0       | 4.278405128 | 1.86E-05 | 0.000292 | Cacng4  |
| 1980.558 | 1809.478 | 1164.88 | 849.959 | 0.909645088 | 1.89E-05 | 0.000295 | Clstn1  |
| 893.1723 | 750.5324 | 433.465 | 458.514 | 0.882061605 | 1.93E-05 | 0.0003   | Zwilch  |
| 481.8976 | 314.6531 | 24.3227 | 3.65836 | 4.810874787 | 1.95E-05 | 0.000303 | Vat11   |
| 2875.807 | 1990.426 | 1177.04 | 1319.45 | 0.963043473 | 1.96E-05 | 0.000304 | Cdca8   |
| 769.5822 | 665.8524 | 388.294 | 390.225 | 0.882219656 | 1.96E-05 | 0.000304 | Gm5527  |
| 4972.685 | 3740.183 | 2488.73 | 2466.95 | 0.813838322 | 1.96E-05 | 0.000304 | Tmc8    |
| 183.8273 | 114.0952 | 26.06   | 2.43891 | 3.342332302 | 1.99E-05 | 0.000307 | Mab2112 |
| 1309.64  | 1133.821 | 737.499 | 637.774 | 0.827411247 | 2.01E-05 | 0.00031  | Akap1   |
| 2741.831 | 2772.157 | 1829.41 | 1769.43 | 0.615354199 | 2.06E-05 | 0.000317 | Slc41a1 |
| 2993.166 | 2480.679 | 1702.59 | 1537.73 | 0.755656449 | 2.07E-05 | 0.000318 | Adsl    |
| 2285.898 | 1812.152 | 1067.59 | 1225.55 | 0.838091762 | 2.13E-05 | 0.000326 | Cit     |
| 145.4001 | 135.488  | 39.09   | 46.3392 | 1.722565245 | 2.15E-05 | 0.00033  | Pcbp3   |
| 891.0951 | 797.775  | 483.848 | 474.367 | 0.816949127 | 2.18E-05 | 0.000333 | Ppip5k1 |
| 7497.454 | 5811.724 | 4082.74 | 3264.48 | 0.856658231 | 2.20E-05 | 0.000335 | Srsf2   |
| 754.0036 | 609.6962 | 361.366 | 343.886 | 0.949894202 | 2.21E-05 | 0.000337 | Phf19   |
| 3453.253 | 3157.228 | 2120.42 | 2157.21 | 0.627901209 | 2.23E-05 | 0.000339 | Nde1    |
| 2133.228 | 1905.746 | 1292.58 | 1118.24 | 0.743251512 | 2.26E-05 | 0.000342 | Rrp9    |
| 3694.202 | 3432.661 | 2341.06 | 2324.28 | 0.611136791 | 2.28E-05 | 0.000345 | Cdk17   |
| 1624.327 | 1418.168 | 930.343 | 895.079 | 0.736332739 | 2.34E-05 | 0.000351 | Plk2    |
| 570.1763 | 488.47   | 267.55  | 274.377 | 0.965858144 | 2.34E-05 | 0.000352 | Lrfn4   |
| 427.8918 | 429.6397 | 221.51  | 210.965 | 0.986552347 | 2.34E-05 | 0.000352 | Tmtc4   |
| 96.58723 | 36.54612 | 3.47467 | 7.31672 | 3.660451191 | 2.44E-05 | 0.000365 | Nos1    |
| 519.2862 | 434.9879 | 238.884 | 156.09  | 1.266234624 | 2.47E-05 | 0.000368 | Dhrs4   |
| 1709.49  | 1403.014 | 919.05  | 669.48  | 0.968169849 | 2.49E-05 | 0.000371 | Cdc6    |
| 863.0537 | 710.4208 | 391.769 | 441.442 | 0.918155655 | 2.49E-05 | 0.000371 | Bcl7a   |
| 7719.709 | 7035.573 | 4980.07 | 4787.57 | 0.594972623 | 2.51E-05 | 0.000372 | Smarca4 |
| 233.6788 | 221.9508 | 90.3414 | 47.5587 | 1.71080838  | 2.52E-05 | 0.000374 | Ube2e2  |
| 2384.562 | 2002.014 | 1357.73 | 1063.36 | 0.855956824 | 2.52E-05 | 0.000374 | Dkc1    |
| 4067.05  | 3585.085 | 2484.39 | 2407.2  | 0.645259099 | 2.56E-05 | 0.000378 | Parp1   |
| 109.0501 | 52.59075 | 6.94934 | 13.414  | 3.014143098 | 2.57E-05 | 0.000379 | Otx1    |
| 5967.637 | 4637.791 | 3262.72 | 2638.9  | 0.845026106 | 2.58E-05 | 0.000381 | Ube2s   |
| 63.35292 | 51.69938 | 7.81801 | 2.43891 | 3.427459694 | 2.62E-05 | 0.000384 | Muc16   |
| 181.7502 | 90.9196  | 33.0094 | 19.5113 | 2.359729143 | 2.63E-05 | 0.000384 | Nectin1 |
| 275.2217 | 202.3407 | 78.1801 | 26.828  | 2.167553865 | 2.64E-05 | 0.000386 | Rassf8  |
| 838.1279 | 763.0116 | 460.394 | 452.417 | 0.810088217 | 2.65E-05 | 0.000386 | Mpzl3   |
| 2444.799 | 1912.877 | 1216.13 | 1281.65 | 0.802869193 | 2.67E-05 | 0.000389 | Nusap1  |
| 1175.664 | 916.327  | 562.028 | 569.485 | 0.886157763 | 2.71E-05 | 0.000395 | Spc25   |
| 1358.453 | 1134.712 | 738.367 | 691.43  | 0.80107182  | 2.72E-05 | 0.000396 | Kn11    |
| 65.43006 | 49.02528 | 7.81801 | 3.65836 | 3.275904034 | 2.76E-05 | 0.000401 | Shisa3  |
| 731.155  | 609.6962 | 351.81  | 360.958 | 0.911378626 | 2.78E-05 | 0.000403 | Trmt61a |
| 1897.472 | 1646.358 | 1100.6  | 854.837 | 0.85600416  | 2.79E-05 | 0.000404 | Wdr18   |
| 1716.76  | 1443.126 | 882.566 | 967.026 | 0.77305515  | 2.83E-05 | 0.000408 | Prc1    |
| 4531.291 | 3223.189 | 2030.08 | 2193.8  | 0.876462183 | 2.84E-05 | 0.00041  | Tpx2    |

|          |          |         |         |             |          |          |               |
|----------|----------|---------|---------|-------------|----------|----------|---------------|
| 2628.627 | 1991.318 | 1362.07 | 1075.56 | 0.921084586 | 2.86E-05 | 0.000412 | Nup93         |
| 2298.361 | 1879.005 | 1263.04 | 1212.14 | 0.754464991 | 2.92E-05 | 0.00042  | Pelp1         |
| 1883.97  | 1524.24  | 898.202 | 1031.66 | 0.821123326 | 2.95E-05 | 0.000423 | Spag5         |
| 948.2166 | 705.964  | 443.02  | 376.811 | 1.01030858  | 3.02E-05 | 0.000432 | Mad111        |
| 4218.681 | 3615.391 | 1811.17 | 2477.93 | 0.869860177 | 3.02E-05 | 0.000432 | Carmil2       |
| 1852.813 | 1693.6   | 1117.98 | 1109.7  | 0.670533312 | 3.03E-05 | 0.000433 | Cdc25a        |
| 1645.099 | 1568.809 | 1039.79 | 885.323 | 0.737897233 | 3.04E-05 | 0.000434 | Slc37a1       |
| 2870.614 | 3085.918 | 1992.72 | 1847.47 | 0.632964972 | 3.05E-05 | 0.000435 | Themis        |
| 89.31723 | 95.37645 | 23.454  | 14.6334 | 2.259604877 | 3.13E-05 | 0.000445 | 6330403K07Rik |
| 77.89293 | 40.11159 | 6.94934 | 3.65836 | 3.439010024 | 3.14E-05 | 0.000447 | Nrxn3         |
| 2181.002 | 2052.822 | 1398.55 | 1252.38 | 0.674516285 | 3.15E-05 | 0.000448 | A430093F15Rik |
| 5747.46  | 5338.407 | 3646.67 | 3759.57 | 0.581942671 | 3.18E-05 | 0.000451 | Lef1          |
| 216.0231 | 221.0594 | 66.0187 | 17.0723 | 2.37413106  | 3.19E-05 | 0.000453 | Ina           |
| 1546.434 | 1350.424 | 900.808 | 828.009 | 0.743588325 | 3.24E-05 | 0.000459 | Ctps          |
| 6697.754 | 5616.514 | 4012.38 | 3305.94 | 0.750226663 | 3.28E-05 | 0.000463 | Cdk4          |
| 68.54578 | 28.5238  | 2.606   | 0       | 5.062324628 | 3.30E-05 | 0.000466 | Gm2464        |
| 10847.89 | 9726.615 | 6991.9  | 6643.58 | 0.593338023 | 3.40E-05 | 0.000479 | G3bp1         |
| 1589.016 | 1225.632 | 762.69  | 799.961 | 0.848843938 | 3.40E-05 | 0.000479 | Bub1          |
| 2689.903 | 1924.465 | 1203.97 | 1288.96 | 0.888248602 | 3.43E-05 | 0.000483 | Cdk1          |
| 1326.257 | 1084.796 | 693.197 | 686.552 | 0.804665543 | 3.46E-05 | 0.000485 | Kcnk5         |
| 3097.023 | 2760.569 | 1879.8  | 1882.84 | 0.638390367 | 3.46E-05 | 0.000485 | Ppp2cb        |
| 3674.469 | 3163.467 | 2193.39 | 2130.38 | 0.660941624 | 3.46E-05 | 0.000485 | Naa50         |
| 1707.413 | 1605.355 | 1065.86 | 860.934 | 0.780110175 | 3.48E-05 | 0.000487 | Gnl3          |
| 737.3864 | 630.1976 | 357.022 | 384.128 | 0.884321545 | 3.53E-05 | 0.000493 | Pask          |
| 2500.882 | 2344.3   | 1519.3  | 1609.68 | 0.631143675 | 3.56E-05 | 0.000496 | Zfp3611       |
| 4285.15  | 3446.031 | 2429.66 | 2170.63 | 0.748382628 | 3.57E-05 | 0.000497 | Nup205        |
| 2982.78  | 3471.881 | 2096.96 | 1746.26 | 0.747427189 | 3.59E-05 | 0.000499 | Serinc5       |
| 2290.052 | 1954.771 | 1305.61 | 928.004 | 0.924587153 | 3.61E-05 | 0.000502 | St6galnac4    |
| 3772.095 | 2776.613 | 1675.66 | 1934.05 | 0.859566776 | 3.63E-05 | 0.000505 | Kifc1         |
| 1546.434 | 1519.784 | 931.212 | 621.921 | 0.978891783 | 3.66E-05 | 0.000508 | 2900026A02Rik |
| 232.6402 | 121.2261 | 49.514  | 20.7307 | 2.313596629 | 3.66E-05 | 0.000508 | Fam124a       |
| 7756.059 | 6525.71  | 4699.49 | 4143.7  | 0.691174177 | 3.70E-05 | 0.000513 | Anapc5        |
| 5280.102 | 4251.829 | 2841.41 | 2976.69 | 0.712192693 | 3.75E-05 | 0.000519 | Pitpnm2       |
| 5852.356 | 4852.611 | 3472.06 | 2963.27 | 0.733664327 | 3.77E-05 | 0.000521 | Eftud2        |
| 1450.886 | 1290.702 | 861.718 | 780.45  | 0.738140396 | 3.79E-05 | 0.000523 | Gpm6b         |
| 1196.435 | 1022.4   | 612.411 | 669.48  | 0.792066999 | 3.80E-05 | 0.000524 | Siva1         |
| 2565.274 | 1977.056 | 1289.1  | 1326.77 | 0.795955122 | 3.81E-05 | 0.000524 | Mad211        |
| 4007.851 | 3301.63  | 2257.67 | 2259.65 | 0.694099973 | 3.83E-05 | 0.000527 | Extl3         |
| 533.8262 | 726.4655 | 275.368 | 112.19  | 1.695058076 | 3.89E-05 | 0.000535 | Msc           |
| 2622.395 | 2072.432 | 1432.43 | 1282.86 | 0.789084824 | 3.92E-05 | 0.000537 | Pola2         |
| 1524.624 | 1108.863 | 737.499 | 618.263 | 0.956132899 | 3.99E-05 | 0.000545 | Fbxo5         |
| 4150.135 | 3485.251 | 2468.75 | 2249.89 | 0.693790246 | 3.99E-05 | 0.000545 | Srsf7         |
| 13.50144 | 129.2485 | 0.86867 | 0       | 7.146160463 | 4.01E-05 | 0.000546 | Ighv1-69      |
| 59.19863 | 41.89433 | 5.212   | 4.87781 | 3.319051396 | 4.11E-05 | 0.000559 | Trim9         |
| 3385.746 | 2529.704 | 1631.36 | 1734.06 | 0.813665098 | 4.15E-05 | 0.000563 | Arhgap11a     |

|          |          |         |         |             |          |          |               |
|----------|----------|---------|---------|-------------|----------|----------|---------------|
| 735.3093 | 557.1054 | 312.72  | 336.569 | 0.993291676 | 4.17E-05 | 0.000565 | Recql4        |
| 6180.544 | 5311.666 | 3789.13 | 3031.56 | 0.75207409  | 4.22E-05 | 0.000571 | Zfp91         |
| 1499.699 | 1356.663 | 773.983 | 391.445 | 1.290303438 | 4.32E-05 | 0.000585 | Nefh          |
| 448.6633 | 351.1993 | 193.713 | 178.04  | 1.102870128 | 4.34E-05 | 0.000587 | Dnajc27       |
| 2080.261 | 1645.467 | 1125.79 | 858.495 | 0.907182757 | 4.37E-05 | 0.000589 | Gar1          |
| 2270.319 | 2006.471 | 1316.9  | 1376.76 | 0.667038846 | 4.37E-05 | 0.000589 | Camk2d        |
| 108.0115 | 47.24254 | 8.68667 | 0       | 4.067469388 | 4.39E-05 | 0.000591 | Iglv1         |
| 2915.273 | 2214.16  | 1459.36 | 1495.05 | 0.795727621 | 4.42E-05 | 0.000595 | Nasp          |
| 10481.27 | 8115.912 | 5589.01 | 5665.58 | 0.724494875 | 4.47E-05 | 0.000602 | Lcp2          |
| 1764.535 | 1548.307 | 1055.43 | 962.149 | 0.714379988 | 4.49E-05 | 0.000604 | Hells         |
| 766.4664 | 708.6381 | 422.172 | 286.572 | 1.053170655 | 4.64E-05 | 0.00062  | Eps8          |
| 95.54866 | 30.30653 | 6.08067 | 2.43891 | 3.83711742  | 4.65E-05 | 0.000621 | Kitl          |
| 1164.24  | 919.0011 | 605.461 | 506.073 | 0.904077243 | 4.66E-05 | 0.000621 | Dhfr          |
| 6910.661 | 4160.018 | 843.476 | 276.816 | 3.304056381 | 4.70E-05 | 0.000627 | Slamf6        |
| 515.1319 | 383.2885 | 219.773 | 193.893 | 1.115890863 | 4.71E-05 | 0.000627 | Alms1         |
| 454.8947 | 509.8629 | 263.206 | 201.21  | 1.050807601 | 4.74E-05 | 0.000631 | E130308A19Rik |
| 2431.298 | 1886.136 | 1300.4  | 1179.21 | 0.799193713 | 4.82E-05 | 0.000639 | Tubg1         |
| 1018.84  | 984.071  | 621.966 | 593.874 | 0.71939685  | 4.83E-05 | 0.00064  | Tfdp2         |
| 1512.161 | 1292.485 | 872.142 | 698.747 | 0.83421568  | 4.87E-05 | 0.000645 | Trim37        |
| 2691.98  | 2419.175 | 1687.82 | 1387.74 | 0.731638595 | 4.90E-05 | 0.000648 | Ftsj3         |
| 1437.384 | 1239.894 | 798.305 | 818.253 | 0.727700819 | 5.02E-05 | 0.000662 | Rtel1         |
| 141.2458 | 152.424  | 52.12   | 29.2669 | 1.835748942 | 5.09E-05 | 0.00067  | Serpinc1      |
| 2143.613 | 1804.13  | 1181.39 | 1234.09 | 0.708709749 | 5.09E-05 | 0.00067  | Dtl           |
| 19241.63 | 19867.72 | 13963.8 | 12881.1 | 0.542786739 | 5.19E-05 | 0.000681 | Fam107b       |
| 529.6719 | 388.6367 | 215.43  | 214.624 | 1.093349436 | 5.25E-05 | 0.000689 | Ccsap         |
| 245.1031 | 140.8362 | 60.8067 | 25.6085 | 2.14156723  | 5.26E-05 | 0.000689 | Cap2          |
| 2524.77  | 1983.295 | 1374.23 | 1014.59 | 0.914697047 | 5.32E-05 | 0.000695 | Erf           |
| 685.4578 | 465.2944 | 277.105 | 249.988 | 1.124180858 | 5.33E-05 | 0.000696 | Ercc6l        |
| 189.0202 | 72.20086 | 24.3227 | 4.87781 | 3.124927229 | 5.41E-05 | 0.000704 | Ighg3         |
| 4356.811 | 3724.138 | 2658.12 | 2477.93 | 0.65342785  | 5.44E-05 | 0.000707 | Arid1b        |
| 954.4481 | 733.5964 | 384.82  | 476.806 | 0.971818315 | 5.46E-05 | 0.000709 | Ldhb          |
| 67.50721 | 28.5238  | 0       | 1.21945 | 6.529900511 | 5.53E-05 | 0.000717 | Gm3650        |
| 994.9524 | 872.6499 | 466.474 | 570.704 | 0.850407569 | 5.69E-05 | 0.000735 | Tyro3         |
| 41131.62 | 33645.6  | 24745.7 | 19903.9 | 0.743857826 | 5.79E-05 | 0.000745 | Ptma          |
| 291.8388 | 250.4746 | 116.401 | 58.5338 | 1.620394484 | 5.79E-05 | 0.000745 | Rapgef5       |
| 4036.931 | 3757.119 | 2623.38 | 2614.51 | 0.573271555 | 5.84E-05 | 0.000751 | Ilf3          |
| 10024.3  | 9426.224 | 6782.56 | 6632.61 | 0.535856107 | 6.02E-05 | 0.00077  | Notch1        |
| 5178.322 | 5181.526 | 3359.14 | 3647.38 | 0.564543596 | 6.03E-05 | 0.000771 | Asxl1         |
| 8276.384 | 6917.021 | 5053.91 | 4410.76 | 0.682470394 | 6.05E-05 | 0.000772 | Rangap1       |
| 2529.962 | 1969.925 | 1386.39 | 1145.07 | 0.828713897 | 6.21E-05 | 0.000789 | Nup85         |
| 10411.69 | 8578.532 | 5844.39 | 6226.53 | 0.65373921  | 6.35E-05 | 0.000805 | H2afz         |
| 5153.396 | 5243.03  | 3636.24 | 3499.83 | 0.54275314  | 6.36E-05 | 0.000805 | Inpp4b        |
| 148.5159 | 133.7053 | 50.3827 | 41.4614 | 1.612835554 | 6.41E-05 | 0.000811 | Gm14085       |
| 4063.934 | 3388.092 | 2395.78 | 1777.96 | 0.83531544  | 6.41E-05 | 0.000811 | Gm9800        |
| 2353.405 | 1730.147 | 1173.57 | 740.208 | 1.09152876  | 6.58E-05 | 0.000828 | Sorl1         |

|          |          |         |         |             |          |          |               |
|----------|----------|---------|---------|-------------|----------|----------|---------------|
| 1885.009 | 1682.013 | 1010.26 | 1171.89 | 0.709848567 | 7.09E-05 | 0.000888 | Tmem245       |
| 3918.534 | 3381.853 | 2429.66 | 2240.14 | 0.644096222 | 7.12E-05 | 0.000891 | Cluh          |
| 10573.71 | 9944.109 | 7275.96 | 6703.33 | 0.553393053 | 7.20E-05 | 0.000899 | Arid1a        |
| 683.3807 | 611.4789 | 363.972 | 369.494 | 0.819779143 | 7.23E-05 | 0.000901 | Ttc27         |
| 3537.378 | 2331.82  | 1652.21 | 1129.21 | 1.076170449 | 7.34E-05 | 0.000912 | Me2           |
| 140.2073 | 151.5327 | 51.2514 | 49.9976 | 1.52642445  | 7.34E-05 | 0.000912 | B4galt4       |
| 432.0461 | 358.3302 | 171.996 | 69.5088 | 1.700576906 | 7.41E-05 | 0.000919 | Sema6a        |
| 1443.616 | 1293.376 | 870.405 | 832.887 | 0.683513659 | 7.50E-05 | 0.000929 | Utp18         |
| 1782.19  | 1461.845 | 905.152 | 1014.59 | 0.757350881 | 7.57E-05 | 0.000937 | Smyd5         |
| 1674.179 | 1402.123 | 972.039 | 829.228 | 0.770641762 | 7.61E-05 | 0.00094  | Tipin         |
| 4543.754 | 4172.497 | 2950.86 | 2935.22 | 0.566269562 | 7.69E-05 | 0.000949 | Npepl1        |
| 1231.747 | 981.3969 | 660.187 | 579.24  | 0.834685483 | 7.70E-05 | 0.000949 | Chaf1b        |
| 4588.413 | 4056.619 | 2945.65 | 2636.46 | 0.630528308 | 7.74E-05 | 0.000953 | Cherp         |
| 686.4964 | 654.2646 | 387.426 | 392.664 | 0.781354898 | 7.83E-05 | 0.000964 | Helq          |
| 1718.837 | 1563.461 | 1070.2  | 845.081 | 0.775334533 | 7.94E-05 | 0.000977 | Cdyl2         |
| 2191.388 | 1908.42  | 1265.65 | 1330.42 | 0.659314061 | 7.98E-05 | 0.000981 | Rbm14         |
| 3861.412 | 3399.68  | 2458.33 | 2126.73 | 0.662524395 | 7.99E-05 | 0.000981 | Ddx27         |
| 6936.625 | 6556.908 | 4126.17 | 2259.65 | 1.078670416 | 8.10E-05 | 0.000994 | Cd200         |
| 2485.304 | 2022.516 | 1414.19 | 1341.4  | 0.709449345 | 8.44E-05 | 0.00103  | Pidd1         |
| 995.9909 | 808.4714 | 536.837 | 441.442 | 0.880692259 | 8.51E-05 | 0.001037 | Gins2         |
| 3337.972 | 2904.079 | 2055.27 | 1551.14 | 0.790332277 | 8.53E-05 | 0.00104  | Sf3b4         |
| 1019.878 | 877.9981 | 570.715 | 551.193 | 0.757525562 | 8.72E-05 | 0.001059 | Polq          |
| 135.0144 | 82.00592 | 29.5347 | 18.2918 | 2.165126098 | 8.72E-05 | 0.001059 | Mlf1          |
| 1528.779 | 1125.799 | 773.114 | 649.969 | 0.897768017 | 8.72E-05 | 0.001059 | Hn11          |
| 175.5187 | 164.0118 | 62.5441 | 67.0699 | 1.391012041 | 8.92E-05 | 0.001081 | Pde11a        |
| 73.73864 | 35.65475 | 6.94934 | 3.65836 | 3.330976878 | 9.07E-05 | 0.001096 | Sox21         |
| 329.2275 | 369.0266 | 175.471 | 107.312 | 1.296625943 | 9.08E-05 | 0.001097 | Nptxr         |
| 784.1222 | 647.1337 | 403.93  | 395.103 | 0.839986841 | 9.17E-05 | 0.001107 | Ssbp2         |
| 4843.902 | 4186.759 | 3062.05 | 2714.5  | 0.644087938 | 9.24E-05 | 0.001114 | Atic          |
| 2666.015 | 2172.265 | 1476.73 | 1513.34 | 0.69414878  | 9.26E-05 | 0.001116 | Slbp          |
| 1754.149 | 1419.059 | 826.971 | 995.074 | 0.801282139 | 9.27E-05 | 0.001116 | Hmmr          |
| 412.3133 | 430.5311 | 234.54  | 189.015 | 0.988913227 | 9.28E-05 | 0.001116 | Rxra          |
| 95.54866 | 132.8139 | 29.5347 | 34.1447 | 1.848824346 | 9.47E-05 | 0.001138 | Vcan          |
| 710.3835 | 484.9046 | 294.478 | 278.035 | 1.060306406 | 9.49E-05 | 0.00114  | Eme1          |
| 4283.073 | 3313.217 | 2413.16 | 2015.76 | 0.777619993 | 9.60E-05 | 0.001152 | Ddx39         |
| 306.3789 | 139.0535 | 63.4127 | 62.1921 | 1.8241505   | 9.67E-05 | 0.001158 | Snn           |
| 764.3893 | 188.9702 | 26.9287 | 41.4614 | 3.804191647 | 9.74E-05 | 0.001162 | Mid1          |
| 2017.946 | 1725.69  | 1197.02 | 1153.6  | 0.670803652 | 9.74E-05 | 0.001162 | Cse11         |
| 9215.253 | 9404.831 | 6691.35 | 6266.77 | 0.522869508 | 9.75E-05 | 0.001162 | Zmiz2         |
| 2034.563 | 1521.566 | 952.06  | 1062.14 | 0.820326589 | 9.80E-05 | 0.001168 | Abcb1b        |
| 2693.018 | 2085.803 | 1308.21 | 1492.61 | 0.771126159 | 9.99E-05 | 0.001186 | Dlgap5        |
| 1308.601 | 995.6588 | 650.632 | 646.31  | 0.828545416 | 0.0001   | 0.001186 | 4930427A07Rik |
| 1882.932 | 1598.224 | 1112.76 | 838.984 | 0.832941632 | 0.0001   | 0.001187 | Rab11fip4     |
| 588.8706 | 578.4983 | 299.69  | 349.983 | 0.847958368 | 0.000101 | 0.001195 | Jcad          |
| 103.8572 | 61.50444 | 16.5047 | 3.65836 | 2.98812175  | 0.000102 | 0.001203 | Neto1         |

|          |          |         |         |             |          |          |               |
|----------|----------|---------|---------|-------------|----------|----------|---------------|
| 9192.404 | 8107.889 | 5948.64 | 5716.8  | 0.568398256 | 0.000104 | 0.001223 | Baz1b         |
| 855.7837 | 712.2036 | 448.232 | 447.539 | 0.807076199 | 0.000104 | 0.001223 | Brip1         |
| 6920.008 | 3349.763 | 1173.57 | 664.602 | 2.481634341 | 0.000106 | 0.001248 | Chst2         |
| 1324.18  | 1091.927 | 659.319 | 751.183 | 0.77721935  | 0.000107 | 0.001255 | Isoc1         |
| 1290.946 | 1092.818 | 737.499 | 699.966 | 0.728739823 | 0.000107 | 0.001257 | Gmnn          |
| 1025.071 | 903.8478 | 605.461 | 514.609 | 0.782014775 | 0.000108 | 0.001262 | Snx10         |
| 8205.761 | 7281.591 | 5364.02 | 4340.03 | 0.673999819 | 0.000113 | 0.001313 | Mybbp1a       |
| 1277.444 | 1207.805 | 740.105 | 818.253 | 0.674287691 | 0.000114 | 0.001318 | Ubash3a       |
| 5865.857 | 4996.121 | 3665.78 | 3419.35 | 0.616091509 | 0.000114 | 0.001321 | Impdh2        |
| 4941.528 | 4202.803 | 3050.76 | 2915.71 | 0.615689045 | 0.000115 | 0.001327 | Sae1          |
| 4005.774 | 3346.198 | 2255.06 | 2431.59 | 0.649678721 | 0.000116 | 0.001335 | Mllt3         |
| 1411.42  | 1128.473 | 765.296 | 728.014 | 0.765314753 | 0.000116 | 0.001341 | Rad54l        |
| 3132.334 | 3197.339 | 2221.18 | 2065.75 | 0.561803265 | 0.000118 | 0.001355 | Slamf1        |
| 1354.298 | 1120.45  | 764.427 | 714.6   | 0.74153575  | 0.000119 | 0.001365 | Ppm1d         |
| 1335.604 | 908.3047 | 547.261 | 612.166 | 0.952797729 | 0.00012  | 0.001373 | Arhgef18      |
| 165.133  | 121.2261 | 49.514  | 43.9003 | 1.611101971 | 0.00012  | 0.001376 | Nfia          |
| 1109.195 | 622.1753 | 301.428 | 419.492 | 1.265503831 | 0.000122 | 0.001392 | Sapcd2        |
| 421.6604 | 268.302  | 150.279 | 134.14  | 1.27532109  | 0.000122 | 0.001398 | Ccdc28b       |
| 857.8608 | 693.4848 | 456.05  | 402.42  | 0.851530889 | 0.000122 | 0.001399 | Prkag2        |
| 2367.945 | 2219.508 | 1528.85 | 1123.12 | 0.789128966 | 0.000123 | 0.001399 | Stoml1        |
| 932.638  | 796.8836 | 522.938 | 492.659 | 0.766773039 | 0.000123 | 0.001405 | Rad51ap1      |
| 4912.448 | 4087.817 | 3015.14 | 2480.37 | 0.71104034  | 0.000123 | 0.001405 | Prpf19        |
| 2875.807 | 2691.042 | 1919.76 | 1816.99 | 0.574619256 | 0.000124 | 0.001409 | Jade2         |
| 220.1774 | 244.235  | 104.24  | 102.434 | 1.168166868 | 0.000126 | 0.00143  | H2-DMb2       |
| 2362.752 | 1918.225 | 1374.23 | 1224.33 | 0.719260966 | 0.000126 | 0.00143  | Tmco4         |
| 762.3122 | 615.9357 | 402.193 | 326.813 | 0.915676582 | 0.000127 | 0.00144  | Gpatch4       |
| 1181.895 | 1038.444 | 701.015 | 659.724 | 0.705325071 | 0.000129 | 0.001454 | Tmem201       |
| 10947.59 | 8386.888 | 6273.52 | 4925.37 | 0.787481389 | 0.000129 | 0.001457 | Ptpn7         |
| 542.1348 | 359.2216 | 176.34  | 51.217  | 1.976285209 | 0.00013  | 0.001463 | Foxf2         |
| 220.1774 | 248.6919 | 110.321 | 92.6784 | 1.204074669 | 0.000131 | 0.001474 | Cradd         |
| 54.00577 | 41.89433 | 6.94934 | 2.43891 | 3.297797099 | 0.000131 | 0.001478 | D130043K22Rik |
| 192.1359 | 136.3794 | 62.5441 | 42.6809 | 1.631609581 | 0.000132 | 0.001486 | 3-Mar         |
| 6195.084 | 5232.334 | 3691.84 | 3815.67 | 0.606055137 | 0.000133 | 0.001492 | Topbp1        |
| 1709.49  | 1945.858 | 1156.2  | 757.28  | 0.932039617 | 0.000134 | 0.001499 | Nrn1          |
| 4314.23  | 3536.06  | 2608.61 | 2179.16 | 0.712666733 | 0.000134 | 0.001499 | Nudc          |
| 5028.768 | 4120.797 | 3002.11 | 2844.98 | 0.645644695 | 0.000134 | 0.0015   | Pom121        |
| 404.0047 | 460.8376 | 224.116 | 235.354 | 0.914015136 | 0.000134 | 0.001501 | Stx1a         |
| 325.0732 | 51.69938 | 0       | 0       | 9.958424108 | 0.000134 | 0.001502 | Gm15726       |
| 371.8089 | 331.5891 | 185.026 | 124.384 | 1.177752747 | 0.000135 | 0.001503 | Ppic          |
| 173.4416 | 82.89729 | 33.0094 | 10.9751 | 2.51686038  | 0.000135 | 0.00151  | Amotl1        |
| 4621.647 | 4001.354 | 2940.44 | 2374.28 | 0.697458454 | 0.000136 | 0.001517 | Scap          |
| 682.3421 | 575.8242 | 357.891 | 349.983 | 0.828767498 | 0.000138 | 0.00154  | Cenph         |
| 2949.546 | 2387.085 | 1574.03 | 1726.75 | 0.693302243 | 0.000139 | 0.001542 | Cpt1a         |
| 6017.489 | 5378.519 | 3990.66 | 3599.83 | 0.585871461 | 0.000139 | 0.00155  | Srrt          |
| 979.3738 | 837.8865 | 527.281 | 554.851 | 0.748013323 | 0.000141 | 0.001569 | Ston2         |

|          |          |         |         |             |          |          |               |
|----------|----------|---------|---------|-------------|----------|----------|---------------|
| 1734.416 | 1473.432 | 980.726 | 1026.78 | 0.676217524 | 0.000142 | 0.001576 | Brca1         |
| 2187.234 | 1607.138 | 1147.51 | 810.936 | 0.952405189 | 0.000142 | 0.001578 | Samd1         |
| 4070.165 | 3276.671 | 2396.65 | 1790.16 | 0.810329266 | 0.000143 | 0.00158  | Tbx21         |
| 2900.733 | 2217.725 | 1610.51 | 1388.96 | 0.770092864 | 0.000143 | 0.001586 | Dtymk         |
| 857.8608 | 632.8718 | 377.87  | 412.175 | 0.916197232 | 0.000145 | 0.001597 | Bard1         |
| 99.70295 | 33.87201 | 8.68667 | 1.21945 | 3.685212393 | 0.000145 | 0.001601 | Slit3         |
| 2336.788 | 2337.169 | 1562.73 | 1113.36 | 0.803052103 | 0.000146 | 0.001606 | Birc3         |
| 13734.08 | 11632.36 | 8768.33 | 7706.94 | 0.622411672 | 0.000146 | 0.001607 | Ptbp1         |
| 3795.982 | 3854.278 | 2647.7  | 2009.66 | 0.715142489 | 0.000147 | 0.001615 | Ptprj         |
| 988.7209 | 1017.943 | 635.865 | 453.637 | 0.878235901 | 0.000147 | 0.001615 | Stk32c        |
| 153.7087 | 3.565475 | 1.73733 | 1.21945 | 5.710943985 | 0.000149 | 0.001632 | Gm42031       |
| 4407.701 | 3604.695 | 2476.57 | 2632.8  | 0.649111972 | 0.000152 | 0.001656 | Ckap5         |
| 372.8475 | 272.7588 | 152.885 | 137.798 | 1.148040238 | 0.000152 | 0.001656 | Fen1          |
| 1356.376 | 1177.498 | 786.144 | 796.303 | 0.678927488 | 0.000153 | 0.001662 | Pwp2          |
| 1956.67  | 1565.243 | 1116.24 | 993.854 | 0.737930673 | 0.000155 | 0.001678 | E2f1          |
| 76.85436 | 38.32885 | 6.94934 | 0       | 3.949442457 | 0.000155 | 0.001678 | AC169985.1    |
| 1867.353 | 1686.47  | 1192.68 | 1103.61 | 0.629204174 | 0.000156 | 0.00169  | Stim2         |
| 4410.817 | 3542.299 | 2618.16 | 2319.4  | 0.687148201 | 0.000158 | 0.001708 | Srf           |
| 3578.921 | 3018.174 | 2204.68 | 1690.16 | 0.759246687 | 0.000159 | 0.001712 | Mbd3          |
| 586.7934 | 435.8793 | 276.236 | 204.868 | 1.083310852 | 0.00016  | 0.001722 | Lockd         |
| 8366.739 | 6389.331 | 4204.35 | 4772.94 | 0.717050059 | 0.00016  | 0.001723 | Hjurp         |
| 2417.797 | 1979.73  | 1308.21 | 1425.54 | 0.685997782 | 0.000162 | 0.001738 | Nat10         |
| 2512.307 | 2151.764 | 1536.67 | 1475.54 | 0.630250341 | 0.000163 | 0.001753 | Trap1         |
| 1228.631 | 973.3746 | 668.874 | 606.068 | 0.786926022 | 0.000164 | 0.001756 | Pole3         |
| 1418.69  | 1201.565 | 841.739 | 662.163 | 0.798850427 | 0.000164 | 0.001759 | Noa1          |
| 1039.611 | 736.2705 | 434.334 | 497.537 | 0.930854154 | 0.000168 | 0.001796 | Wdr62         |
| 4987.225 | 4283.026 | 3086.38 | 3091.31 | 0.585396291 | 0.000171 | 0.00182  | Fkbp4         |
| 417.5061 | 411.8123 | 208.48  | 236.574 | 0.900379053 | 0.000171 | 0.001823 | Tfap4         |
| 3969.424 | 3341.741 | 2450.51 | 1854.79 | 0.763045113 | 0.000171 | 0.001823 | Prmt1         |
| 4008.89  | 3738.4   | 2744.12 | 2493.78 | 0.56419138  | 0.000175 | 0.001855 | Cbx6          |
| 195.2516 | 152.424  | 71.2307 | 58.5338 | 1.415501485 | 0.000175 | 0.001859 | Rragb         |
| 672.9949 | 470.6427 | 305.771 | 232.916 | 1.082182705 | 0.000176 | 0.001863 | Tsr2          |
| 263.7974 | 241.5609 | 116.401 | 120.726 | 1.092061554 | 0.000176 | 0.001865 | 1500009L16Rik |
| 7927.423 | 7521.369 | 5404.85 | 4021.76 | 0.712209359 | 0.000176 | 0.001867 | Gbp5          |
| 1945.246 | 1852.264 | 1310.82 | 1158.48 | 0.61989656  | 0.000177 | 0.001876 | Pdim1         |
| 3394.055 | 2635.777 | 1942.34 | 1685.28 | 0.732316304 | 0.000182 | 0.001921 | Alyref        |
| 2664.977 | 2541.292 | 1818.99 | 1501.15 | 0.647937743 | 0.000185 | 0.001943 | Clasp1        |
| 1340.797 | 1086.578 | 763.559 | 654.846 | 0.773368511 | 0.000186 | 0.001957 | Casp1         |
| 2094.801 | 1823.74  | 1307.34 | 1214.58 | 0.634994784 | 0.000186 | 0.001959 | Drosha        |
| 140.2073 | 114.0952 | 39.9587 | 12.1945 | 2.258957199 | 0.000188 | 0.001971 | Dhrs9         |
| 6909.622 | 6042.588 | 4544.87 | 3948.59 | 0.608361486 | 0.00019  | 0.001987 | Ssrp1         |
| 219.1388 | 106.0729 | 41.696  | 48.7781 | 1.847192274 | 0.000191 | 0.002002 | Begain        |
| 1082.192 | 803.1232 | 479.504 | 551.193 | 0.87181507  | 0.000192 | 0.002009 | Cntrob        |
| 67.50721 | 36.54612 | 7.81801 | 2.43891 | 3.287676714 | 0.000192 | 0.002011 | Gm37805       |
| 2963.047 | 3349.763 | 2187.3  | 1866.98 | 0.638287494 | 0.000195 | 0.002039 | Syt11         |

|          |          |         |         |             |          |          |               |
|----------|----------|---------|---------|-------------|----------|----------|---------------|
| 5052.655 | 4562.025 | 2862.26 | 3396.18 | 0.619867246 | 0.000196 | 0.002039 | Agfg1         |
| 44.65861 | 43.67706 | 5.212   | 0       | 3.964060242 | 0.000198 | 0.002056 | Scn2b         |
| 1382.34  | 1195.325 | 761.821 | 838.984 | 0.687809999 | 0.000198 | 0.002065 | Wdr76         |
| 864.0923 | 751.4238 | 503.827 | 446.32  | 0.763759559 | 0.000201 | 0.002089 | Mtbp          |
| 1981.596 | 1688.252 | 1203.1  | 881.665 | 0.814023991 | 0.000201 | 0.002089 | Beat1         |
| 872.4008 | 692.5935 | 447.364 | 445.1   | 0.809527599 | 0.000201 | 0.00209  | Wee1          |
| 437.239  | 372.5921 | 220.642 | 203.649 | 0.930324367 | 0.000203 | 0.0021   | 5730508B09Rik |
| 583.6777 | 538.3867 | 308.377 | 336.569 | 0.800040516 | 0.000203 | 0.0021   | Ska2          |
| 820.4722 | 953.7645 | 558.553 | 487.781 | 0.760724881 | 0.000203 | 0.0021   | Palm3         |
| 72.70007 | 67.74402 | 17.3733 | 7.31672 | 2.475159295 | 0.000203 | 0.0021   | Rian          |
| 3808.445 | 3563.692 | 2592.1  | 2073.07 | 0.659296626 | 0.000204 | 0.002113 | Rexo2         |
| 909.7894 | 869.0844 | 539.443 | 571.924 | 0.679262492 | 0.000208 | 0.002153 | St8sia4       |
| 1027.148 | 817.3851 | 555.079 | 374.372 | 0.985363932 | 0.000213 | 0.002186 | Calcr1        |
| 6489     | 4694.839 | 3477.28 | 3177.9  | 0.748538275 | 0.000213 | 0.002193 | Kpna2         |
| 6080.842 | 5292.056 | 3681.41 | 3962    | 0.573407123 | 0.000215 | 0.002209 | Nsd2          |
| 3066.904 | 2670.541 | 1968.4  | 1602.36 | 0.68313979  | 0.000216 | 0.002219 | C1qbp         |
| 79.97008 | 25.84969 | 5.212   | 0       | 4.234123486 | 0.000219 | 0.002238 | Scn1a         |
| 1520.47  | 1291.593 | 921.656 | 786.547 | 0.717530654 | 0.000219 | 0.002238 | Gdpd5         |
| 2793.76  | 2420.066 | 1726.91 | 1719.43 | 0.597016782 | 0.000219 | 0.002238 | Cc2d1b        |
| 482.9362 | 267.4106 | 164.178 | 121.945 | 1.385963753 | 0.000223 | 0.002276 | Xylt1         |
| 63.35292 | 67.74402 | 12.1613 | 1.21945 | 3.226226039 | 0.000224 | 0.00228  | Cadm1         |
| 1414.536 | 1121.342 | 793.962 | 697.527 | 0.764206796 | 0.000225 | 0.002289 | Cinp          |
| 94.51009 | 94.48508 | 23.454  | 30.4863 | 1.818318608 | 0.000225 | 0.002294 | Grhl1         |
| 264.836  | 292.3689 | 113.795 | 35.3641 | 1.888112052 | 0.000229 | 0.002326 | Fosb          |
| 505.7848 | 382.3972 | 217.167 | 234.135 | 0.976946025 | 0.000234 | 0.002363 | Igf2bp3       |
| 16628.58 | 13768.97 | 10388.4 | 7564.27 | 0.759509101 | 0.000237 | 0.002392 | Hnrnpab       |
| 2744.947 | 2365.692 | 1739.07 | 1584.07 | 0.620214406 | 0.000239 | 0.002407 | Sart3         |
| 1385.456 | 1301.398 | 841.739 | 906.054 | 0.620963809 | 0.000239 | 0.002409 | Trim59        |
| 804.8936 | 659.6128 | 410.88  | 435.345 | 0.791395636 | 0.00024  | 0.002414 | Sgol          |
| 2350.289 | 1803.239 | 1316.03 | 1170.68 | 0.739146445 | 0.00024  | 0.002416 | Actl6a        |
| 120.4744 | 154.2068 | 52.9887 | 36.5836 | 1.607559567 | 0.000244 | 0.002451 | Iglon5        |
| 748.8107 | 615.0444 | 403.062 | 376.811 | 0.804781821 | 0.000244 | 0.002454 | Riox1         |
| 1277.444 | 1024.183 | 722.731 | 631.677 | 0.763311353 | 0.000247 | 0.00248  | Atad5         |
| 40.50432 | 37.43748 | 4.34334 | 3.65836 | 3.272959084 | 0.000249 | 0.002492 | Cd1d2         |
| 452.8176 | 385.9626 | 235.409 | 207.307 | 0.918918075 | 0.000252 | 0.002519 | Xrcc2         |
| 1500.737 | 1255.047 | 866.93  | 860.934 | 0.67298218  | 0.000255 | 0.002548 | Mms22l        |
| 220.1774 | 253.1487 | 108.583 | 110.97  | 1.109544236 | 0.000257 | 0.002573 | Trp73         |
| 684.4192 | 549.0831 | 350.942 | 340.227 | 0.83443292  | 0.000259 | 0.002585 | Cmc2          |
| 38.42718 | 27.63243 | 0.86867 | 0       | 6.026791475 | 0.000259 | 0.00259  | Igkv9-120     |
| 960.6795 | 851.2571 | 582.876 | 457.295 | 0.79789639  | 0.000262 | 0.002613 | Brca2         |
| 1630.559 | 1188.194 | 821.759 | 803.62  | 0.793601922 | 0.000263 | 0.002616 | Kif20b        |
| 37.38861 | 53.48212 | 6.94934 | 2.43891 | 3.2245199   | 0.000264 | 0.002627 | Aard          |
| 2683.671 | 2484.244 | 1797.27 | 1731.62 | 0.549977211 | 0.000267 | 0.002652 | Heatr1        |
| 78.9315  | 90.9196  | 22.5854 | 6.09727 | 2.529121441 | 0.000267 | 0.002652 | Tead1         |
| 998.0681 | 828.0815 | 575.927 | 473.148 | 0.797203298 | 0.000273 | 0.002712 | Mrpl38        |



|          |          |         |         |             |          |          |          |
|----------|----------|---------|---------|-------------|----------|----------|----------|
| 540.0577 | 505.406  | 317.064 | 245.11  | 0.890959007 | 0.000276 | 0.002736 | Mapk8    |
| 4321.5   | 3314.109 | 2500.03 | 2136.48 | 0.719055526 | 0.000278 | 0.002746 | Nucks1   |
| 698.9592 | 594.5429 | 387.426 | 259.744 | 0.99451797  | 0.000278 | 0.002746 | Ccdc86   |
| 2924.62  | 2411.152 | 1727.78 | 1727.97 | 0.626430164 | 0.00028  | 0.002765 | Pent     |
| 2831.148 | 2289.035 | 1569.68 | 1680.41 | 0.655769204 | 0.00028  | 0.002766 | Nup188   |
| 1984.712 | 1850.481 | 1333.4  | 1217.01 | 0.587698385 | 0.000281 | 0.002771 | Lrch1    |
| 146.4387 | 146.1845 | 38.2214 | 62.1921 | 1.555848627 | 0.000283 | 0.002787 | Art2b    |
| 7029.058 | 4745.647 | 3640.59 | 2534.02 | 0.930696014 | 0.000283 | 0.002788 | AI506816 |
| 7526.534 | 6121.029 | 4625.65 | 4286.38 | 0.614544035 | 0.000287 | 0.002824 | Ipo5     |
| 364.5389 | 345.851  | 198.925 | 174.382 | 0.925270913 | 0.000288 | 0.002827 | Zfp101   |
| 3081.444 | 2463.743 | 1706.06 | 1809.67 | 0.657405334 | 0.00029  | 0.002842 | Ppp2r5d  |
| 18865.67 | 14750.37 | 11383.9 | 9730.02 | 0.670794994 | 0.00029  | 0.002846 | Hnrnpa0  |
| 4883.368 | 4480.019 | 3340.03 | 3163.26 | 0.525555675 | 0.000291 | 0.002853 | Cbx5     |
| 3495.835 | 3143.857 | 2343.66 | 1956    | 0.626038416 | 0.000293 | 0.002868 | Bop1     |
| 42.58147 | 40.11159 | 5.212   | 4.87781 | 3.030700542 | 0.000294 | 0.002879 | Gm13561  |
| 225.3702 | 316.4359 | 130.3   | 86.5812 | 1.314951697 | 0.000303 | 0.002949 | Sntb1    |
| 3521.799 | 2505.637 | 1413.32 | 1897.47 | 0.864958833 | 0.000303 | 0.00295  | Ass1     |
| 3068.981 | 2250.706 | 1611.38 | 1587.73 | 0.73330122  | 0.000304 | 0.002959 | Nol7     |
| 1513.2   | 1338.836 | 962.484 | 826.789 | 0.671067609 | 0.000305 | 0.002963 | Lyar     |
| 15781.11 | 14376.89 | 10932.2 | 8887.38 | 0.605396566 | 0.000305 | 0.002967 | Jak2     |
| 8.308579 | 41.00296 | 0       | 0       | 7.028345714 | 0.000307 | 0.002977 | Ighv1-81 |
| 337.536  | 278.9984 | 159.835 | 143.895 | 1.018321963 | 0.000311 | 0.00301  | Gnb11    |
| 4736.929 | 4092.274 | 3095.06 | 2516.95 | 0.65306643  | 0.000312 | 0.00302  | Ppp5c    |
| 2879.961 | 2197.224 | 1641.78 | 1412.13 | 0.732464041 | 0.000315 | 0.003047 | Ppil1    |
| 125.6673 | 82.00592 | 23.454  | 2.43891 | 2.960717521 | 0.000317 | 0.003066 | Olfml2a  |
| 1509.046 | 1196.217 | 840.87  | 810.936 | 0.710941128 | 0.000322 | 0.0031   | Gm5518   |
| 1450.886 | 1256.83  | 905.152 | 767.036 | 0.693644576 | 0.000324 | 0.003113 | Sdad1    |
| 17777.24 | 14813.66 | 11468.1 | 9572.71 | 0.631089265 | 0.000324 | 0.003113 | Actn4    |
| 2298.361 | 2002.905 | 1476.73 | 1177.99 | 0.694826325 | 0.000327 | 0.003146 | Pin1     |
| 860.9765 | 961.7868 | 594.169 | 524.365 | 0.703378869 | 0.000328 | 0.003152 | Erc1     |
| 455.9333 | 635.5459 | 273.63  | 114.629 | 1.485285404 | 0.000333 | 0.003187 | Uchl1    |
| 1864.237 | 1390.535 | 1025.9  | 823.131 | 0.814203039 | 0.000333 | 0.003187 | Cks1b    |
| 44.65861 | 61.50444 | 10.424  | 6.09727 | 2.660789152 | 0.000334 | 0.003193 | P2rx6    |
| 38.42718 | 24.95832 | 0.86867 | 0       | 5.967479001 | 0.000338 | 0.003223 | Alox12b  |
| 1536.049 | 1355.772 | 972.908 | 890.201 | 0.633164595 | 0.000339 | 0.003223 | Npat     |
| 60.2372  | 49.91665 | 6.94934 | 12.1945 | 2.54920572  | 0.000344 | 0.003274 | Vax2     |
| 702.075  | 723.7914 | 436.94  | 269.499 | 1.008925137 | 0.000344 | 0.003274 | Ccdc88a  |
| 387.3875 | 511.6456 | 242.358 | 139.018 | 1.231648847 | 0.000345 | 0.003275 | Celsr2   |
| 1766.612 | 1337.053 | 978.988 | 838.984 | 0.770260656 | 0.000345 | 0.003278 | Rrs1     |
| 1248.364 | 1047.358 | 732.287 | 699.966 | 0.679737174 | 0.000353 | 0.003336 | E2f6     |
| 305.3403 | 221.0594 | 127.694 | 82.9228 | 1.313053361 | 0.000358 | 0.003372 | Lrr1     |
| 2683.671 | 2445.916 | 1804.22 | 1441.39 | 0.659178503 | 0.000359 | 0.00338  | Mllt1    |
| 42.58147 | 22.28422 | 0.86867 | 2.43891 | 4.366363886 | 0.00036  | 0.003388 | Slc30a3  |
| 9835.281 | 8390.453 | 6455.07 | 5808.26 | 0.571375383 | 0.00036  | 0.003388 | U2af2    |
| 1268.097 | 1189.086 | 836.527 | 752.403 | 0.627648989 | 0.000364 | 0.003421 | Nol11    |

|          |          |         |         |             |          |          |           |
|----------|----------|---------|---------|-------------|----------|----------|-----------|
| 1619.134 | 1405.688 | 1000.7  | 696.308 | 0.831643536 | 0.000365 | 0.003423 | Nutf2     |
| 583.6777 | 278.107  | 185.895 | 102.434 | 1.573395597 | 0.000365 | 0.003425 | Lancl3    |
| 2942.276 | 2666.975 | 1984.04 | 1623.09 | 0.635925519 | 0.000368 | 0.003441 | Prmt5     |
| 666.7635 | 567.8018 | 377.87  | 331.691 | 0.796541522 | 0.000372 | 0.003471 | Car12     |
| 205.6373 | 182.7306 | 91.2101 | 54.8754 | 1.399360303 | 0.000374 | 0.003492 | Usp27x    |
| 6226.242 | 4846.371 | 3564.14 | 3557.15 | 0.636624972 | 0.000375 | 0.003495 | Phgdh     |
| 138.1301 | 65.96128 | 26.06   | 21.9502 | 2.080353108 | 0.000375 | 0.003495 | Raver2    |
| 2018.985 | 1568.809 | 1137.09 | 1073.12 | 0.698157726 | 0.000378 | 0.003516 | Hat1      |
| 2308.746 | 1747.083 | 1216.13 | 1262.13 | 0.71047809  | 0.000378 | 0.003516 | Uald1     |
| 2285.898 | 1960.12  | 1457.62 | 1177.99 | 0.686630016 | 0.00038  | 0.003528 | Prkar2a   |
| 175.5187 | 146.1845 | 70.3621 | 46.3392 | 1.451849186 | 0.000381 | 0.003538 | Cyb5rl    |
| 701.0364 | 527.6903 | 358.76  | 287.791 | 0.922983921 | 0.000384 | 0.003563 | Ift27     |
| 500.5919 | 435.8793 | 241.49  | 278.035 | 0.851850181 | 0.000387 | 0.003583 | Tube1     |
| 636.6449 | 470.6427 | 304.902 | 286.572 | 0.902863251 | 0.000388 | 0.00359  | Taf5      |
| 893.1723 | 703.2899 | 416.96  | 491.44  | 0.814607326 | 0.00039  | 0.003605 | Neil3     |
| 4317.346 | 3412.159 | 2453.99 | 2527.93 | 0.633562879 | 0.00039  | 0.003605 | Rnps1     |
| 364.5389 | 363.6784 | 198.925 | 110.97  | 1.224834067 | 0.00039  | 0.003605 | Fsd11     |
| 756.0807 | 687.2452 | 456.05  | 429.248 | 0.703891576 | 0.000391 | 0.003608 | Arhgap33  |
| 300.1474 | 135.488  | 58.2007 | 76.8256 | 1.692616111 | 0.000395 | 0.003642 | Evpl      |
| 1312.756 | 1227.415 | 842.607 | 841.423 | 0.592778797 | 0.000395 | 0.003642 | Prps1     |
| 2230.854 | 1923.574 | 1375.1  | 1382.86 | 0.590799467 | 0.000395 | 0.003642 | Impdh2-ps |
| 4630.994 | 4077.12  | 3097.67 | 2523.05 | 0.630903394 | 0.000398 | 0.003664 | Phlda3    |
| 11175.04 | 10376.42 | 7869.26 | 6298.48 | 0.604868756 | 0.000401 | 0.003691 | Polr2a    |
| 1542.28  | 1233.654 | 793.093 | 899.957 | 0.713859708 | 0.000404 | 0.003718 | Gstp3     |
| 45.69719 | 19.61011 | 1.73733 | 0       | 5.067600481 | 0.000405 | 0.00372  | Lmo1      |
| 228.4859 | 180.9478 | 92.9474 | 85.3617 | 1.196017076 | 0.000405 | 0.003721 | Axin2     |
| 2741.831 | 2516.334 | 1833.76 | 1342.62 | 0.725887383 | 0.000411 | 0.003765 | Plxna1    |
| 737.3864 | 608.8048 | 416.092 | 347.544 | 0.815063542 | 0.000416 | 0.003807 | Arhgap31  |
| 627.2977 | 443.9016 | 254.52  | 295.108 | 0.963575284 | 0.000417 | 0.003817 | Rad54b    |
| 5410.962 | 4787.541 | 3400.83 | 1991.37 | 0.918621911 | 0.00042  | 0.003838 | Tiam1     |
| 3723.282 | 3211.601 | 2437.48 | 1980.39 | 0.649657803 | 0.00042  | 0.003838 | Nop58     |
| 1661.716 | 1387.861 | 986.806 | 970.685 | 0.639068465 | 0.000423 | 0.003861 | Tbl3      |
| 460.0876 | 400.2245 | 251.914 | 217.063 | 0.872124966 | 0.00043  | 0.003919 | Bend3     |
| 2295.245 | 1692.709 | 1042.4  | 1277.99 | 0.78186394  | 0.000446 | 0.004052 | Ncaph     |
| 2561.12  | 1964.577 | 1489.76 | 1158.48 | 0.771815037 | 0.00045  | 0.004081 | Sf3a2     |
| 5.192862 | 90.9196  | 0.86867 | 0       | 6.580878195 | 0.000451 | 0.00409  | Ighv14-3  |
| 1552.666 | 1254.156 | 907.758 | 841.423 | 0.681210908 | 0.000452 | 0.004096 | Mrpl12    |
| 1249.403 | 936.8285 | 675.823 | 584.118 | 0.793346588 | 0.000455 | 0.004117 | Prim2     |
| 8489.291 | 7196.019 | 5528.2  | 5148.53 | 0.554711054 | 0.000456 | 0.004122 | Khsrp     |
| 1014.685 | 763.0116 | 479.504 | 537.779 | 0.805710563 | 0.000457 | 0.004128 | Cdc7      |
| 1337.681 | 1290.702 | 906.889 | 841.423 | 0.587315375 | 0.000458 | 0.004138 | Urb2      |
| 1871.507 | 1595.55  | 1166.62 | 1097.51 | 0.61396767  | 0.000471 | 0.004238 | Kat2a     |
| 47416.02 | 42701.02 | 33163.1 | 30979   | 0.490486507 | 0.000472 | 0.004244 | Lcp1      |
| 576.4077 | 541.0608 | 351.81  | 278.035 | 0.823517561 | 0.000474 | 0.004259 | Mettl1    |
| 3440.79  | 3084.136 | 2326.29 | 2140.14 | 0.546287366 | 0.000478 | 0.004291 | Sng5      |

|          |          |         |         |             |          |          |          |
|----------|----------|---------|---------|-------------|----------|----------|----------|
| 3577.882 | 3168.816 | 2408.81 | 2021.85 | 0.605839355 | 0.00048  | 0.004307 | Rbm10    |
| 1332.488 | 1166.802 | 846.951 | 710.941 | 0.680086126 | 0.000492 | 0.004399 | Eif2b1   |
| 1363.646 | 1136.495 | 813.073 | 769.475 | 0.658799678 | 0.000497 | 0.004432 | Wdr46    |
| 4240.491 | 3599.347 | 2761.49 | 2430.37 | 0.593970111 | 0.000501 | 0.00446  | Adrm1    |
| 1668.986 | 1350.424 | 984.2   | 918.248 | 0.665463357 | 0.000504 | 0.004478 | Tysnd1   |
| 2403.257 | 2116.109 | 1548.83 | 1515.78 | 0.560030745 | 0.000504 | 0.004483 | Rbmx11   |
| 21123.52 | 19104.7  | 13744.9 | 8017.91 | 0.886137065 | 0.000507 | 0.004502 | Gbp2     |
| 18.6943  | 42.7857  | 0.86867 | 0       | 5.929705364 | 0.000509 | 0.004513 | Pcsk6    |
| 1286.791 | 1337.944 | 914.707 | 764.597 | 0.642795363 | 0.000512 | 0.004533 | Kctd17   |
| 1274.328 | 990.3106 | 723.6   | 599.971 | 0.772866777 | 0.000515 | 0.004553 | Thoc3    |
| 5483.662 | 5001.47  | 3835.17 | 3370.57 | 0.540660133 | 0.000517 | 0.004564 | Ak2      |
| 3883.222 | 2626.863 | 1614.85 | 2040.15 | 0.833156406 | 0.000518 | 0.004568 | Ube2c    |
| 12700.7  | 15565.08 | 9875.01 | 7096    | 0.735793326 | 0.00052  | 0.004585 | Nfkb2    |
| 15811.23 | 13901.79 | 10834.9 | 8804.45 | 0.597128741 | 0.00052  | 0.004585 | Mif      |
| 675.0721 | 491.1441 | 338.78  | 247.549 | 0.987941906 | 0.000521 | 0.004591 | Icam2    |
| 1416.613 | 1068.751 | 664.531 | 787.767 | 0.775829948 | 0.000523 | 0.004608 | Cdca2    |
| 3190.494 | 2977.171 | 2104.78 | 2219.4  | 0.512474568 | 0.000527 | 0.004637 | Rgs16    |
| 6792.264 | 6547.103 | 4830.66 | 4866.84 | 0.459993767 | 0.000535 | 0.004698 | Agpat3   |
| 160.9787 | 187.1874 | 80.7861 | 48.7781 | 1.415571185 | 0.000535 | 0.004698 | Cask     |
| 670.9178 | 561.5623 | 334.437 | 381.689 | 0.784484618 | 0.000535 | 0.004699 | Ttk      |
| 100.7415 | 98.94192 | 36.484  | 19.5113 | 1.81589641  | 0.000549 | 0.004805 | Kazn     |
| 602.372  | 558.8882 | 342.255 | 362.178 | 0.721760363 | 0.000553 | 0.004831 | BC055324 |
| 3457.408 | 2929.037 | 2235.95 | 1716.99 | 0.691075436 | 0.000555 | 0.004843 | Prkca    |
| 498.5148 | 435.8793 | 251.914 | 280.474 | 0.812813661 | 0.000555 | 0.004844 | Slc35f2  |
| 1810.232 | 1563.461 | 1160.54 | 901.176 | 0.708746708 | 0.000556 | 0.004848 | Firre    |
| 1040.65  | 848.583  | 603.724 | 543.876 | 0.717533576 | 0.000558 | 0.004865 | Sp2      |
| 189.0202 | 160.4464 | 67.7561 | 19.5113 | 1.982556653 | 0.000559 | 0.00487  | Zfp750   |
| 103.8572 | 116.7693 | 37.3527 | 40.242  | 1.510656421 | 0.00056  | 0.004879 | Prob1    |
| 662.6092 | 502.7319 | 315.326 | 334.13  | 0.843316949 | 0.000561 | 0.004882 | Cenpi    |
| 713.4993 | 681.897  | 443.889 | 434.125 | 0.667815034 | 0.000561 | 0.004882 | Acad9    |
| 1560.974 | 1586.636 | 959.009 | 1119.46 | 0.600052506 | 0.000562 | 0.004883 | Lpcat1   |
| 1460.233 | 1965.468 | 1062.38 | 1023.12 | 0.716231902 | 0.000565 | 0.004906 | Fas      |
| 56.08291 | 28.5238  | 5.212   | 0       | 3.909964834 | 0.000566 | 0.00491  | Olf156   |
| 5140.933 | 4724.254 | 3618    | 3063.27 | 0.561662402 | 0.000566 | 0.004913 | Bicd11   |
| 1059.344 | 1002.79  | 705.358 | 607.288 | 0.649839503 | 0.000567 | 0.00492  | Nle1     |
| 277.2988 | 282.5639 | 150.279 | 141.457 | 0.93912114  | 0.000574 | 0.004969 | Fam72a   |
| 1859.045 | 1618.725 | 1170.96 | 1152.38 | 0.581520407 | 0.000576 | 0.004984 | Arid5b   |
| 295.9931 | 237.1041 | 136.381 | 121.945 | 1.041790338 | 0.000578 | 0.004995 | Aunip    |
| 216.0231 | 291.4776 | 127.694 | 81.7034 | 1.270480127 | 0.000579 | 0.005005 | Fnbp11   |
| 4367.197 | 3670.656 | 2840.54 | 2354.76 | 0.628893458 | 0.000581 | 0.005016 | Zc3h18   |
| 570.1763 | 483.1218 | 319.67  | 284.133 | 0.800269994 | 0.000585 | 0.005045 | Traip    |
| 476.7047 | 472.4254 | 295.347 | 232.916 | 0.84152325  | 0.000586 | 0.005049 | Aste1    |
| 4574.912 | 3262.409 | 2554.75 | 1797.47 | 0.847762066 | 0.000588 | 0.005063 | Myb      |
| 2016.908 | 1774.715 | 1320.37 | 1206.04 | 0.584820385 | 0.000589 | 0.005072 | Nup155   |
| 1869.43  | 1589.31  | 1190.94 | 1006.05 | 0.653325045 | 0.00059  | 0.005078 | Ino80e   |

|          |          |         |         |             |          |          |          |
|----------|----------|---------|---------|-------------|----------|----------|----------|
| 3278.773 | 2712.435 | 2085.67 | 1765.77 | 0.636587984 | 0.000592 | 0.00509  | Ruvbl2   |
| 8517.332 | 7975.967 | 6145.82 | 5569.24 | 0.493258383 | 0.000596 | 0.005122 | Pcna     |
| 181.7502 | 141.7276 | 71.2307 | 39.0225 | 1.539112646 | 0.000601 | 0.005158 | H1fx     |
| 1564.09  | 1166.802 | 859.112 | 771.914 | 0.74235655  | 0.000607 | 0.005213 | Ckap2l   |
| 1649.253 | 1379.839 | 1030.24 | 857.276 | 0.680787697 | 0.000616 | 0.005265 | Pole4    |
| 1004.3   | 841.452  | 587.219 | 564.607 | 0.679290202 | 0.000617 | 0.005269 | Nsl1     |
| 5888.706 | 5219.855 | 3907.27 | 3929.08 | 0.50332485  | 0.000619 | 0.005287 | Xpol     |
| 29.08003 | 27.63243 | 0.86867 | 2.43891 | 4.175251526 | 0.000629 | 0.005366 | Igkv6-15 |
| 2941.237 | 2691.042 | 1980.56 | 1969.42 | 0.511683447 | 0.00063  | 0.005366 | Irf2     |
| 1204.744 | 1087.47  | 786.144 | 642.652 | 0.67985159  | 0.000634 | 0.005398 | Pno1     |
| 2809.338 | 3608.26  | 2129.1  | 2002.34 | 0.635411047 | 0.000639 | 0.005433 | Aff3     |
| 1539.164 | 1927.139 | 1062.38 | 1143.85 | 0.652688107 | 0.00064  | 0.005437 | Rras2    |
| 344.806  | 311.0877 | 186.764 | 160.968 | 0.911976386 | 0.000641 | 0.005437 | Chrm4    |
| 1170.471 | 982.2883 | 710.57  | 637.774 | 0.673466367 | 0.000645 | 0.005469 | Pop5     |
| 1178.78  | 1181.063 | 798.305 | 541.437 | 0.814133862 | 0.000647 | 0.005479 | Abcc5    |
| 1482.043 | 1599.115 | 1071.94 | 787.767 | 0.726644942 | 0.000658 | 0.005569 | Slc29a3  |
| 7428.909 | 5958.8   | 4517.94 | 4448.57 | 0.578133386 | 0.000659 | 0.005569 | Snrpb    |
| 779.9679 | 722.0086 | 496.878 | 434.125 | 0.687899072 | 0.000663 | 0.005595 | Chek1    |
| 4003.697 | 3504.862 | 2685.92 | 2486.47 | 0.537236598 | 0.00068  | 0.005726 | Kdm2b    |
| 967.9495 | 756.772  | 530.756 | 502.415 | 0.738025836 | 0.000683 | 0.005745 | Slc25a10 |
| 182.7887 | 188.9702 | 89.4728 | 80.4839 | 1.126610391 | 0.000684 | 0.005752 | Efnb1    |
| 3135.45  | 2762.351 | 2084.8  | 1984.05 | 0.535106646 | 0.000685 | 0.005756 | Emgl     |
| 172.403  | 117.6607 | 52.12   | 56.0949 | 1.422593776 | 0.000687 | 0.005773 | BC064078 |
| 906.6737 | 716.6604 | 471.686 | 501.195 | 0.738615034 | 0.00069  | 0.005792 | Trip13   |
| 1299.254 | 1129.364 | 823.497 | 745.086 | 0.629341548 | 0.000701 | 0.005878 | Tdg      |
| 535.9034 | 351.1993 | 237.146 | 187.796 | 1.057875518 | 0.000702 | 0.005883 | Jazfl    |
| 49.85148 | 54.37349 | 11.2927 | 2.43891 | 2.869716522 | 0.000714 | 0.005975 | Lbp      |
| 973.1424 | 605.2393 | 319.67  | 447.539 | 1.042432403 | 0.000714 | 0.005975 | Pif1     |
| 4947.759 | 4426.537 | 3209.73 | 3396.18 | 0.505036778 | 0.000724 | 0.006046 | Map4k1   |
| 2134.266 | 2012.71  | 1494.98 | 1362.13 | 0.536708262 | 0.000727 | 0.006067 | Atm      |
| 5750.575 | 5079.91  | 3959.39 | 3459.59 | 0.545342944 | 0.000728 | 0.006074 | Pebp1    |
| 2694.057 | 2494.05  | 1838.97 | 1816.99 | 0.504734601 | 0.000734 | 0.006111 | Ppid     |
| 57.12148 | 88.2455  | 19.1107 | 4.87781 | 2.562118703 | 0.000734 | 0.006113 | Fat1     |
| 1907.858 | 1410.145 | 1009.39 | 1024.34 | 0.705809202 | 0.000739 | 0.006138 | Cks2     |
| 692.7278 | 532.1471 | 356.154 | 346.325 | 0.800882703 | 0.00074  | 0.006138 | Mastl    |
| 1562.013 | 1563.461 | 961.615 | 1121.9  | 0.586332291 | 0.00074  | 0.006138 | Frmd6    |
| 2745.985 | 2445.024 | 1854.61 | 1707.23 | 0.542731795 | 0.000744 | 0.006155 | Ncbp1    |
| 7303.241 | 6313.564 | 4939.24 | 3872.98 | 0.627324614 | 0.000746 | 0.006171 | Tfdp1    |
| 52.96719 | 11.58779 | 0.86867 | 0       | 5.996964096 | 0.000753 | 0.006222 | Ighv8-8  |
| 916.0209 | 943.068  | 635.865 | 571.924 | 0.621004367 | 0.000758 | 0.006258 | Cmtm4    |
| 2668.093 | 2422.74  | 1810.3  | 1745.04 | 0.517506923 | 0.000761 | 0.006278 | Rif1     |
| 1177.741 | 969.8091 | 697.54  | 658.505 | 0.662196934 | 0.00077  | 0.006346 | Bdh1     |
| 3456.369 | 3184.86  | 2436.61 | 2053.56 | 0.563875774 | 0.000773 | 0.006368 | Pcdcl1   |
| 3798.059 | 3509.318 | 2657.25 | 2015.76 | 0.644099876 | 0.000784 | 0.006443 | Nop2     |
| 1438.423 | 1022.4   | 601.987 | 775.572 | 0.838063262 | 0.000784 | 0.006445 | Nek2     |

|          |          |         |         |             |          |          |               |
|----------|----------|---------|---------|-------------|----------|----------|---------------|
| 1329.373 | 1118.668 | 828.709 | 624.36  | 0.750197974 | 0.000787 | 0.006455 | Bcl2a1d       |
| 1114.388 | 768.3598 | 521.2   | 542.657 | 0.823131837 | 0.000787 | 0.006455 | Gja1          |
| 87.24008 | 88.2455  | 31.272  | 19.5113 | 1.773749054 | 0.000787 | 0.006455 | 4930452B06Rik |
| 1069.73  | 981.3969 | 703.621 | 621.921 | 0.628193142 | 0.000788 | 0.006459 | Orc6          |
| 892.1337 | 663.1783 | 408.274 | 478.026 | 0.812174951 | 0.000801 | 0.006552 | 9430015G10Rik |
| 24351.41 | 22020.37 | 17396.8 | 14881   | 0.5225807   | 0.000802 | 0.006552 | Uba1          |
| 225.3702 | 190.7529 | 105.109 | 63.4116 | 1.293707652 | 0.000802 | 0.006552 | Sphk1         |
| 1047.92  | 981.3969 | 634.996 | 697.527 | 0.60771855  | 0.000808 | 0.006591 | Rad18         |
| 2291.091 | 1932.487 | 1479.34 | 1158.48 | 0.677724799 | 0.00081  | 0.006607 | Cactin        |
| 144.3616 | 143.5104 | 64.2814 | 54.8754 | 1.268049743 | 0.000821 | 0.006692 | Gm17173       |
| 8126.829 | 8227.333 | 5980.78 | 4180.29 | 0.686176486 | 0.00084  | 0.006831 | Tnfsf8        |
| 724.9235 | 603.4566 | 412.617 | 247.549 | 1.004120014 | 0.000845 | 0.006866 | Cd3eap        |
| 990.7981 | 952.8731 | 612.411 | 314.619 | 1.064524159 | 0.000847 | 0.006879 | Tubb2b        |
| 277.2988 | 284.3466 | 159.835 | 117.068 | 1.01435683  | 0.000849 | 0.006883 | Pcdhgc3       |
| 424.7761 | 377.0489 | 243.227 | 186.576 | 0.894822876 | 0.000851 | 0.006898 | Zranb3        |
| 304.3017 | 395.7677 | 195.45  | 119.506 | 1.146512782 | 0.000853 | 0.006914 | Gbp11         |
| 1658.6   | 1422.624 | 1060.64 | 756.061 | 0.760120016 | 0.000858 | 0.006939 | Zmynd19       |
| 3161.414 | 2862.185 | 2103.04 | 2151.12 | 0.501711899 | 0.000865 | 0.006989 | Eif4enif1     |
| 466.319  | 341.3942 | 211.955 | 214.624 | 0.920077297 | 0.000866 | 0.00699  | Gins1         |
| 10854.12 | 9461.878 | 6797.32 | 7464.27 | 0.510563507 | 0.000878 | 0.007068 | Vars          |
| 193.1745 | 207.6889 | 103.371 | 80.4839 | 1.119005753 | 0.000878 | 0.00707  | Fgf2          |
| 164.0944 | 185.4047 | 83.3921 | 73.1672 | 1.155868852 | 0.000884 | 0.007109 | Bcl2l14       |
| 9176.826 | 8084.714 | 6351.7  | 4952.2  | 0.610351488 | 0.00089  | 0.007145 | Kcnab2        |
| 3987.08  | 3323.914 | 2599.05 | 2274.28 | 0.584517333 | 0.000891 | 0.007154 | Rfwd3         |
| 3373.283 | 2745.415 | 2101.31 | 1984.05 | 0.582280097 | 0.000892 | 0.007154 | Fbxl14        |
| 2286.936 | 2026.081 | 1532.33 | 1419.44 | 0.546385052 | 0.000895 | 0.007174 | Tnrc6c        |
| 562.9063 | 221.9508 | 26.06   | 2.43891 | 4.769186216 | 0.000902 | 0.007223 | Wnt3          |
| 2493.612 | 2361.236 | 1693.9  | 1753.57 | 0.494008869 | 0.000909 | 0.007264 | Pprc1         |
| 407.1204 | 563.345  | 270.156 | 132.92  | 1.262171804 | 0.00091  | 0.007268 | Mid2          |
| 10470.89 | 9397.7   | 7296.81 | 7044.78 | 0.470160264 | 0.00091  | 0.007268 | Trim28        |
| 823.5879 | 691.7021 | 479.504 | 462.173 | 0.685209045 | 0.000912 | 0.007279 | Lsm3          |
| 4243.607 | 3814.167 | 2931.75 | 2774.26 | 0.497543673 | 0.000916 | 0.007308 | Smarca5       |
| 17.65573 | 35.65475 | 0.86867 | 0       | 5.724675068 | 0.000923 | 0.007344 | Clstn2        |
| 58.16006 | 50.80801 | 10.424  | 13.414  | 2.202675851 | 0.000927 | 0.007371 | Rtkn2         |
| 736.3478 | 598.9997 | 366.578 | 424.37  | 0.756715481 | 0.000932 | 0.007402 | Rfc4          |
| 129.8216 | 167.5773 | 66.8874 | 47.5587 | 1.37052968  | 0.000938 | 0.007446 | 1700007K13Rik |
| 7882.765 | 7229     | 5537.76 | 3965.66 | 0.668675373 | 0.000944 | 0.007482 | Pfkl          |
| 1876.7   | 1717.667 | 1291.71 | 1137.75 | 0.563981489 | 0.000946 | 0.0075   | Atad3a        |
| 23448.89 | 21498.92 | 16297.1 | 10676.3 | 0.736541622 | 0.000952 | 0.007542 | Cd5           |
| 1119.581 | 869.9758 | 541.18  | 647.53  | 0.744032533 | 0.000953 | 0.007543 | Stil          |
| 5027.729 | 4173.388 | 3301.81 | 2708.41 | 0.613764443 | 0.000955 | 0.007554 | Trp53         |
| 3533.223 | 3569.932 | 2654.65 | 2435.25 | 0.480420563 | 0.00096  | 0.007595 | Spop          |
| 1122.697 | 793.3181 | 551.604 | 560.949 | 0.7836584   | 0.000963 | 0.007613 | Ddias         |
| 1269.135 | 1076.773 | 803.517 | 642.652 | 0.695763785 | 0.000965 | 0.007627 | Mrto4         |
| 1487.236 | 1582.179 | 1081.49 | 770.694 | 0.726887675 | 0.000973 | 0.007677 | Reep3         |

|          |          |         |         |             |          |          |               |
|----------|----------|---------|---------|-------------|----------|----------|---------------|
| 2787.528 | 2221.291 | 1696.51 | 1593.83 | 0.605645128 | 0.000979 | 0.007717 | Exosc10       |
| 1151.777 | 961.7868 | 691.459 | 667.041 | 0.636783075 | 0.000982 | 0.007738 | Pknox1        |
| 10878.01 | 9684.721 | 7678.15 | 6470.42 | 0.539091602 | 0.000985 | 0.007755 | Eif3b         |
| 1002.222 | 894.0428 | 621.966 | 621.921 | 0.607905562 | 0.000988 | 0.007777 | Tex10         |
| 61.27577 | 45.4598  | 13.03   | 7.31672 | 2.366244251 | 0.000992 | 0.007797 | Gm37065       |
| 1942.13  | 1286.245 | 925.131 | 942.637 | 0.789094931 | 0.000998 | 0.007844 | Vrk1          |
| 488.129  | 442.1189 | 290.135 | 256.085 | 0.765539167 | 0.000999 | 0.007848 | Apobec1       |
| 3484.41  | 3185.752 | 2355.83 | 2409.64 | 0.485080928 | 0.001001 | 0.007858 | Wdr82         |
| 823.5879 | 926.132  | 589.825 | 530.462 | 0.642373376 | 0.001006 | 0.00788  | Slc26a2       |
| 130.8601 | 86.46276 | 40.8274 | 23.1696 | 1.747579086 | 0.001007 | 0.007886 | Dgki          |
| 519.2862 | 436.7706 | 295.347 | 248.768 | 0.809865069 | 0.001013 | 0.00791  | Haus1         |
| 21031.09 | 19118.08 | 15113.9 | 14000.5 | 0.463536727 | 0.001014 | 0.007913 | Ncl           |
| 3670.315 | 3265.975 | 2371.46 | 2513.29 | 0.505982357 | 0.001016 | 0.007926 | Isyna1        |
| 711.4221 | 561.5623 | 303.165 | 403.639 | 0.851304754 | 0.001019 | 0.007943 | Cbx2          |
| 1162.163 | 1544.742 | 840.001 | 410.956 | 1.111318709 | 0.001019 | 0.007943 | Smpd13b       |
| 48.8129  | 59.7217  | 10.424  | 13.414  | 2.198626514 | 0.001027 | 0.007972 | Tub           |
| 11985.13 | 9643.718 | 7613.87 | 4952.2  | 0.783072327 | 0.001032 | 0.008008 | Pml           |
| 3149.99  | 2697.282 | 2076.98 | 1454.81 | 0.726182565 | 0.001061 | 0.008206 | Pde7a         |
| 3102.216 | 2871.098 | 2205.55 | 1987.71 | 0.509808362 | 0.001065 | 0.008237 | Slc39a1       |
| 1940.053 | 1829.089 | 1360.33 | 1276.77 | 0.514636766 | 0.00107  | 0.00827  | Taf5l         |
| 563.9448 | 393.0936 | 241.49  | 267.06  | 0.91239966  | 0.001071 | 0.008276 | Nanos1        |
| 4440.936 | 3796.339 | 2956.08 | 2759.62 | 0.526831792 | 0.001075 | 0.008296 | Uba2          |
| 4328.77  | 3597.564 | 2849.23 | 2296.23 | 0.622607283 | 0.001076 | 0.008306 | Ranbp1        |
| 184.8659 | 14.2619  | 0.86867 | 0       | 7.641477714 | 0.001082 | 0.008332 | Iglv3         |
| 221.2159 | 158.6636 | 90.3414 | 70.7283 | 1.231146888 | 0.001082 | 0.008332 | Zfp428        |
| 3287.082 | 3023.523 | 2334.98 | 2068.19 | 0.518546603 | 0.001082 | 0.008332 | Smpd4         |
| 2519.577 | 2261.402 | 1633.96 | 1713.33 | 0.514404993 | 0.001089 | 0.008381 | Mprrip        |
| 324.0346 | 284.3466 | 152.885 | 174.382 | 0.896539218 | 0.001093 | 0.008402 | Sc1t1         |
| 3.115717 | 42.7857  | 0       | 0       | 6.924938003 | 0.001097 | 0.008426 | Ighv1-52      |
| 4404.586 | 3676.896 | 2652.04 | 2876.69 | 0.547768619 | 0.0011   | 0.008447 | Scrib         |
| 4487.671 | 3812.384 | 3008.2  | 2626.7  | 0.558152039 | 0.0011   | 0.008447 | Hnrnpd        |
| 1467.503 | 1272.874 | 957.272 | 723.136 | 0.703461194 | 0.001104 | 0.008467 | E130309D02Rik |
| 1840.35  | 1655.272 | 1232.64 | 1180.43 | 0.534078827 | 0.00111  | 0.008506 | Ppm1f         |
| 1703.259 | 949.3076 | 751.397 | 369.494 | 1.240220817 | 0.001112 | 0.008516 | Ehd3          |
| 1027.148 | 722.0086 | 516.857 | 492.659 | 0.791817514 | 0.001113 | 0.00852  | Paqr4         |
| 2282.782 | 1931.596 | 1493.24 | 1127.99 | 0.683613324 | 0.001122 | 0.008583 | Snrnp40       |
| 1303.408 | 1137.386 | 707.095 | 853.617 | 0.646417015 | 0.001123 | 0.008591 | Il6ra         |
| 356.2303 | 320.8927 | 174.602 | 63.4116 | 1.498812506 | 0.001128 | 0.00861  | Spsb1         |
| 4517.79  | 3819.515 | 2831.86 | 2958.39 | 0.525935856 | 0.00113  | 0.008626 | Rbm38         |
| 246.1417 | 223.7335 | 124.219 | 115.848 | 0.966658779 | 0.001139 | 0.00868  | Cenpu         |
| 2250.586 | 2169.591 | 1629.62 | 1334.08 | 0.575524453 | 0.001146 | 0.008726 | Zfp62         |
| 1236.94  | 1145.409 | 823.497 | 796.303 | 0.555953545 | 0.001146 | 0.008726 | Pik3r2        |
| 13.50144 | 18.71874 | 0       | 0       | 6.412190808 | 0.001147 | 0.008728 | Igkv4-59      |
| 2030.409 | 1653.489 | 1145.77 | 1268.23 | 0.610075402 | 0.001148 | 0.00873  | Taf4          |
| 2485.304 | 2275.664 | 1747.76 | 1506.02 | 0.548154684 | 0.001159 | 0.008801 | Utp4          |

|          |          |         |         |             |          |          |               |
|----------|----------|---------|---------|-------------|----------|----------|---------------|
| 2171.655 | 1743.517 | 1292.58 | 1293.84 | 0.597758683 | 0.001172 | 0.008878 | Slc16a1       |
| 1543.319 | 1197.999 | 855.637 | 885.323 | 0.65473065  | 0.001173 | 0.008879 | Suv39h1       |
| 3092.869 | 2775.722 | 1926.7  | 2154.77 | 0.524313727 | 0.001174 | 0.008885 | Dnajc9        |
| 1172.548 | 852.1484 | 534.231 | 645.091 | 0.780572951 | 0.001187 | 0.008978 | Kif14         |
| 6250.129 | 5437.349 | 4277.32 | 3982.73 | 0.500439783 | 0.001192 | 0.009013 | Psmc3         |
| 3690.048 | 3773.164 | 2758.89 | 2710.84 | 0.448273037 | 0.001195 | 0.009031 | Rab27a        |
| 4507.404 | 4056.619 | 3188.01 | 2731.58 | 0.532185656 | 0.001197 | 0.009045 | Ei24          |
| 1885.009 | 1764.91  | 1255.22 | 1310.91 | 0.508459557 | 0.001207 | 0.009105 | Mdc1          |
| 1290.946 | 1114.211 | 838.264 | 675.577 | 0.665855875 | 0.001216 | 0.00916  | Rnf216        |
| 1977.442 | 1197.999 | 950.322 | 743.867 | 0.904963025 | 0.00122  | 0.009185 | H2afx         |
| 122.5515 | 62.39581 | 26.9287 | 6.09727 | 2.453148079 | 0.001258 | 0.009436 | Ms4a1         |
| 48.8129  | 22.28422 | 4.34334 | 0       | 3.918174544 | 0.001261 | 0.009458 | Igf2          |
| 10841.66 | 9092.852 | 7327.21 | 5770.45 | 0.605632943 | 0.001266 | 0.00948  | Hnrnpm        |
| 99.70295 | 78.44044 | 32.1407 | 24.3891 | 1.64589537  | 0.001266 | 0.00948  | Mmp15         |
| 4270.61  | 3933.61  | 3075.08 | 2575.49 | 0.537300127 | 0.001267 | 0.009485 | Noc2l         |
| 759.1964 | 699.7244 | 496.009 | 406.078 | 0.690819037 | 0.001276 | 0.009537 | Aimp2         |
| 983.5281 | 828.9729 | 613.279 | 510.951 | 0.686739576 | 0.001279 | 0.009552 | Dbr1          |
| 2696.134 | 2257.837 | 1602.69 | 1753.57 | 0.561926865 | 0.001283 | 0.00957  | 9030617O03Rik |
| 86.20151 | 57.04759 | 18.242  | 2.43891 | 2.745656555 | 0.001283 | 0.00957  | AC122326.1    |
| 2729.368 | 2835.444 | 2072.64 | 1912.1  | 0.481442287 | 0.001286 | 0.009592 | Gfi1          |
| 6222.087 | 5291.164 | 4196.53 | 3829.08 | 0.520263034 | 0.001293 | 0.009626 | Ctbp1         |
| 1126.851 | 967.135  | 721.863 | 543.876 | 0.723682108 | 0.001313 | 0.009753 | Heatr3        |
| 29.08003 | 24.95832 | 2.606   | 0       | 4.232217556 | 0.001326 | 0.009833 | Gm44171       |
| 2199.696 | 1787.194 | 1309.08 | 1353.59 | 0.582234568 | 0.001333 | 0.009873 | Pde12         |
| 7688.552 | 6317.13  | 4985.28 | 4719.28 | 0.529053237 | 0.001337 | 0.009903 | Raly          |
| 1347.028 | 1210.479 | 904.283 | 808.498 | 0.577063662 | 0.001344 | 0.009948 | Pih1d1        |
| 5328.915 | 4800.02  | 3718.77 | 3613.24 | 0.465996797 | 0.001345 | 0.009948 | Sf3a1         |
| 1845.543 | 1537.611 | 1022.42 | 1190.19 | 0.613269127 | 0.001347 | 0.009961 | Ncapg         |
| 49.85148 | 40.11159 | 8.68667 | 8.53617 | 2.383011798 | 0.001348 | 0.009961 | Acy3          |
| 4187.524 | 3216.95  | 2500.89 | 2388.91 | 0.598254127 | 0.001352 | 0.009987 | Lsm4          |
| 69.58435 | 46.35117 | 15.636  | 7.31672 | 2.307693209 | 0.001357 | 0.010011 | Igsf9         |
| 3981.887 | 3315.891 | 2447.04 | 2586.46 | 0.535903474 | 0.001357 | 0.010011 | Supt16        |
| 1643.022 | 2035.886 | 1202.24 | 1240.18 | 0.591540533 | 0.001358 | 0.010013 | Hipk2         |
| 205.6373 | 186.2961 | 99.0281 | 47.5587 | 1.406245334 | 0.001363 | 0.010041 | Icam5         |
| 1282.637 | 1373.599 | 953.797 | 841.423 | 0.564245008 | 0.001367 | 0.010066 | Brpf3         |
| 2851.92  | 2026.081 | 1541.02 | 1502.37 | 0.680176283 | 0.001389 | 0.010202 | Tacc3         |
| 5448.351 | 4991.665 | 3901.19 | 3679.09 | 0.461517901 | 0.001396 | 0.010245 | Rela          |
| 1422.844 | 1254.156 | 943.373 | 851.178 | 0.575754331 | 0.0014   | 0.010267 | Nt5c3b        |
| 42.58147 | 13.37053 | 1.73733 | 0       | 4.854580315 | 0.001407 | 0.010308 | Ralyl         |
| 2319.132 | 1867.417 | 1409.85 | 1386.52 | 0.581768269 | 0.001408 | 0.010312 | Hmgbl         |
| 1964.979 | 1672.208 | 1279.55 | 1184.09 | 0.561183776 | 0.001416 | 0.010365 | Vac14         |
| 14.54001 | 66.85265 | 4.34334 | 2.43891 | 3.561161496 | 0.001427 | 0.010434 | Ighv1-26      |
| 986.6438 | 725.5741 | 455.182 | 546.315 | 0.774624466 | 0.001448 | 0.010571 | Kifc5b        |
| 752.965  | 794.2095 | 531.625 | 473.148 | 0.621410717 | 0.001469 | 0.01071  | Mrpl1         |
| 241.9874 | 107.8556 | 66.8874 | 45.1198 | 1.634650669 | 0.001476 | 0.010751 | St3gal6       |

|          |          |         |         |             |          |          |           |
|----------|----------|---------|---------|-------------|----------|----------|-----------|
| 13635.42 | 11781.22 | 9535.36 | 8067.9  | 0.529705283 | 0.001499 | 0.010887 | Ran       |
| 3525.953 | 2848.814 | 2224.66 | 2097.46 | 0.560167579 | 0.001503 | 0.010904 | Cdk2ap1   |
| 6225.203 | 5635.233 | 4451.92 | 4137.6  | 0.465213254 | 0.001545 | 0.011171 | Stip1     |
| 2500.882 | 2136.611 | 1601.82 | 1618.21 | 0.526053689 | 0.001546 | 0.011171 | Ubl7      |
| 982.4895 | 721.1173 | 499.484 | 523.145 | 0.735992255 | 0.001547 | 0.011171 | Lsm2      |
| 4042.124 | 4269.656 | 3116.78 | 2981.56 | 0.446622475 | 0.001547 | 0.011171 | Mdn1      |
| 657.4163 | 499.1665 | 361.366 | 293.888 | 0.816512461 | 0.001548 | 0.011171 | Nup35     |
| 680.2649 | 528.5816 | 385.688 | 285.352 | 0.845291216 | 0.001548 | 0.011171 | Qpctl     |
| 1401.034 | 1035.77  | 794.831 | 697.527 | 0.70593263  | 0.001565 | 0.011278 | Gle1      |
| 60.2372  | 32.08927 | 8.68667 | 7.31672 | 2.518101414 | 0.001573 | 0.011311 | Chn1      |
| 2035.602 | 1730.147 | 1275.2  | 1308.47 | 0.543360786 | 0.001573 | 0.011311 | Rpap1     |
| 1123.735 | 864.6276 | 616.754 | 628.018 | 0.675218732 | 0.001576 | 0.011326 | Baiap2    |
| 7121.491 | 7226.326 | 5531.67 | 4982.69 | 0.4482221   | 0.001577 | 0.011326 | Etv6      |
| 96.58723 | 91.81097 | 37.3527 | 28.0474 | 1.517176525 | 0.00159  | 0.01141  | Bbs7      |
| 1567.206 | 1463.627 | 1098.86 | 1001.17 | 0.528299127 | 0.001599 | 0.01145  | Ikbkap    |
| 1438.423 | 1350.424 | 770.508 | 1010.93 | 0.648379078 | 0.001607 | 0.011494 | Plxnb2    |
| 45.69719 | 49.02528 | 8.68667 | 0       | 3.364930187 | 0.001616 | 0.011544 | Fam160a1  |
| 8047.898 | 7237.914 | 5764.48 | 5309.5  | 0.46476962  | 0.00162  | 0.011565 | Srsf1     |
| 970.0266 | 998.3329 | 667.137 | 679.235 | 0.548252981 | 0.001626 | 0.011604 | Tnfsf9    |
| 90.3558  | 73.09223 | 29.5347 | 20.7307 | 1.6886806   | 0.001628 | 0.011604 | Tnfrsf13c |
| 555.6362 | 481.3391 | 329.225 | 303.644 | 0.710501654 | 0.001633 | 0.011634 | Ap1s2     |
| 4046.278 | 3203.579 | 2415.76 | 2492.56 | 0.562602491 | 0.001639 | 0.011669 | Hmgn1     |
| 1353.26  | 1084.796 | 838.264 | 675.577 | 0.6855368   | 0.001647 | 0.011724 | Cops7b    |
| 3476.102 | 3231.211 | 2523.48 | 2034.05 | 0.556618392 | 0.001654 | 0.011757 | Psmc7     |
| 143.323  | 131.9226 | 59.0694 | 19.5113 | 1.788998006 | 0.001656 | 0.011762 | Tln2      |
| 379.0789 | 219.2767 | 113.795 | 149.993 | 1.183930005 | 0.00166  | 0.011782 | Neurl1b   |
| 1078.038 | 856.6053 | 653.238 | 506.073 | 0.736246861 | 0.001662 | 0.011792 | Lsm6      |
| 1558.897 | 1177.498 | 781.801 | 919.468 | 0.686228199 | 0.001665 | 0.011806 | Diaph3    |
| 118.3973 | 129.2485 | 53.8574 | 48.7781 | 1.26839033  | 0.001667 | 0.011818 | Igdcc4    |
| 466.319  | 407.3555 | 272.762 | 167.065 | 0.98411693  | 0.001669 | 0.011818 | Dact3     |
| 15.57859 | 31.1979  | 0.86867 | 0       | 5.537429862 | 0.001675 | 0.011853 | Gm22211   |
| 1371.954 | 1059.837 | 658.45  | 825.57  | 0.713584005 | 0.001676 | 0.011854 | Ect2      |
| 2834.264 | 2306.862 | 1734.73 | 1769.43 | 0.552825679 | 0.001677 | 0.011856 | Hnrnp11   |
| 1112.311 | 1119.559 | 561.159 | 795.084 | 0.721164589 | 0.00168  | 0.011862 | Egfr      |
| 2031.448 | 1709.645 | 1309.08 | 1242.62 | 0.551319181 | 0.001681 | 0.011862 | Ilf2      |
| 56.08291 | 68.63539 | 18.242  | 4.87781 | 2.393744069 | 0.001709 | 0.012024 | Ripk4     |
| 820.4722 | 715.769  | 524.675 | 435.345 | 0.675687611 | 0.001715 | 0.012063 | Alg8      |
| 1786.345 | 1788.086 | 1316.03 | 1230.43 | 0.488658136 | 0.001727 | 0.01214  | Prdm4     |
| 1213.053 | 1148.974 | 836.527 | 570.704 | 0.744610653 | 0.001738 | 0.012206 | Fam212b   |
| 1439.461 | 1349.532 | 1014.6  | 893.859 | 0.546033158 | 0.001752 | 0.012296 | Tsr1      |
| 826.7036 | 650.6991 | 461.262 | 453.637 | 0.690437314 | 0.001754 | 0.012296 | Hlcs      |
| 921.2137 | 754.9893 | 556.816 | 503.634 | 0.658817404 | 0.001756 | 0.012301 | Rnaseh2b  |
| 6034.106 | 5345.538 | 4286.87 | 3429.1  | 0.559988923 | 0.001756 | 0.012301 | Srsf6     |
| 666.7635 | 516.9938 | 353.548 | 356.08  | 0.737459103 | 0.001759 | 0.012317 | Atcay     |
| 6847.308 | 5916.014 | 4428.47 | 4709.53 | 0.482096026 | 0.001773 | 0.012403 | Rad21     |



|          |          |         |         |             |          |          |           |
|----------|----------|---------|---------|-------------|----------|----------|-----------|
| 610.6806 | 496.4923 | 351.81  | 310.961 | 0.737829589 | 0.001776 | 0.012413 | Adnp      |
| 1826.849 | 1741.734 | 1322.11 | 1074.34 | 0.573027398 | 0.001777 | 0.01242  | Pdrg1     |
| 2332.634 | 2382.628 | 1766    | 1627.97 | 0.473864381 | 0.001793 | 0.012505 | Snx27     |
| 274.1831 | 189.8615 | 121.613 | 76.8256 | 1.216879722 | 0.001799 | 0.012542 | Siah1b    |
| 2768.834 | 2332.712 | 1849.39 | 1612.12 | 0.558653587 | 0.0018   | 0.012542 | Prpf31    |
| 299.1089 | 275.4329 | 138.987 | 171.943 | 0.88966762  | 0.001803 | 0.012557 | Csad      |
| 13169.1  | 10957.6  | 8971.6  | 7514.27 | 0.549163627 | 0.001803 | 0.012557 | Maz       |
| 730.1164 | 536.6039 | 382.214 | 360.958 | 0.767774634 | 0.001808 | 0.012578 | Nmral1    |
| 579.5234 | 599.8911 | 398.718 | 340.227 | 0.672314462 | 0.001817 | 0.012623 | Themis2   |
| 3401.325 | 2701.738 | 2179.49 | 1563.34 | 0.704338747 | 0.001817 | 0.012623 | Pdcd1     |
| 1490.351 | 1248.808 | 862.587 | 958.49  | 0.589379432 | 0.001823 | 0.01265  | Mapk11    |
| 239.9102 | 178.2737 | 108.583 | 84.1423 | 1.11113568  | 0.001829 | 0.012679 | Chchd6    |
| 859.938  | 789.7526 | 575.058 | 495.098 | 0.622280088 | 0.001839 | 0.012741 | Emc8      |
| 1731.3   | 1331.705 | 851.294 | 1054.83 | 0.685123299 | 0.001841 | 0.012749 | Kif23     |
| 4274.764 | 4363.25  | 3311.36 | 2998.64 | 0.452696285 | 0.001852 | 0.012815 | Rnf145    |
| 371.8089 | 311.0877 | 207.612 | 151.212 | 0.922672952 | 0.001864 | 0.012889 | Gemin6    |
| 855.7837 | 746.9669 | 552.473 | 419.492 | 0.71849834  | 0.001876 | 0.012968 | Ccdc92    |
| 2589.161 | 801.3404 | 233.672 | 60.9727 | 3.522770418 | 0.001896 | 0.013092 | Angptl2   |
| 5076.542 | 4413.166 | 3399.1  | 3433.98 | 0.473721393 | 0.001898 | 0.013098 | Anapc1    |
| 13284.38 | 14175.44 | 10649   | 9355.65 | 0.456854269 | 0.001901 | 0.013109 | Ptpn1     |
| 1610.826 | 1317.443 | 974.645 | 985.318 | 0.578863669 | 0.001901 | 0.013109 | Adprhl2   |
| 2152.961 | 2168.7   | 1579.24 | 1568.22 | 0.457364115 | 0.001919 | 0.013227 | AI504432  |
| 14.54001 | 42.7857  | 2.606   | 0       | 4.331334961 | 0.001941 | 0.013362 | Igkv6-17  |
| 2277.589 | 1895.941 | 1505.4  | 1256.04 | 0.594657692 | 0.001953 | 0.013431 | Tomm40    |
| 34.27289 | 18.71874 | 2.606   | 0       | 4.207688419 | 0.001954 | 0.013431 | Igkv10-94 |
| 99.70295 | 100.7247 | 40.8274 | 15.8529 | 1.80032253  | 0.001956 | 0.013438 | Kcnh4     |
| 729.0778 | 688.1366 | 491.666 | 390.225 | 0.681426476 | 0.001956 | 0.013438 | Ift57     |
| 30.1186  | 17.82737 | 1.73733 | 1.21945 | 3.991148181 | 0.001977 | 0.013559 | Gm5907    |
| 5998.794 | 5030.885 | 3987.18 | 3827.86 | 0.496821207 | 0.001984 | 0.013593 | Rbbp4     |
| 3353.55  | 2953.104 | 2345.4  | 2085.27 | 0.508672973 | 0.001987 | 0.013595 | Phb       |
| 375.9632 | 334.2632 | 221.51  | 165.846 | 0.869388441 | 0.001987 | 0.013595 | Wdr34     |
| 81.00865 | 32.08927 | 10.424  | 10.9751 | 2.400531922 | 0.001989 | 0.013597 | Tox2      |
| 2482.188 | 2246.249 | 1736.47 | 1640.16 | 0.485229794 | 0.00199  | 0.013602 | Ebna1bp2  |
| 1300.293 | 1231.871 | 924.262 | 776.792 | 0.572262313 | 0.002006 | 0.013689 | Polr1b    |
| 147.4773 | 154.2068 | 61.6754 | 75.6061 | 1.141508993 | 0.002037 | 0.013888 | Arhgef17  |
| 34.27289 | 12.47916 | 0.86867 | 0       | 5.532081732 | 0.002053 | 0.013974 | Wnt10a    |
| 508.9005 | 407.3555 | 286.66  | 241.452 | 0.791562939 | 0.002056 | 0.013982 | Bmpr1a    |
| 1106.08  | 1039.336 | 773.983 | 641.432 | 0.598041206 | 0.002061 | 0.01401  | Armc5     |
| 4646.573 | 4073.555 | 3274.88 | 2854.74 | 0.507998104 | 0.002064 | 0.014014 | Dpp9      |
| 1289.907 | 999.2243 | 767.902 | 684.113 | 0.655283332 | 0.002078 | 0.014097 | Tssc4     |
| 855.7837 | 681.0057 | 496.878 | 468.27  | 0.66972255  | 0.002085 | 0.014133 | Eefsec    |
| 2531.001 | 2273.881 | 1656.55 | 1769.43 | 0.488187975 | 0.00209  | 0.01416  | Rbl1      |
| 893.1723 | 835.2124 | 583.745 | 587.776 | 0.560869045 | 0.002098 | 0.01421  | Calhm2    |
| 6959.474 | 6342.979 | 5100.82 | 4243.7  | 0.509068175 | 0.002099 | 0.01421  | Tardbp    |
| 6934.548 | 6059.524 | 4906.23 | 4318.08 | 0.49396895  | 0.002102 | 0.014227 | Srsf3     |

|          |          |         |         |             |          |          |               |
|----------|----------|---------|---------|-------------|----------|----------|---------------|
| 759.1964 | 617.7185 | 442.152 | 424.37  | 0.666900232 | 0.002145 | 0.014484 | Dars2         |
| 622.1049 | 457.2721 | 320.538 | 307.302 | 0.780202713 | 0.002154 | 0.014533 | Haspin        |
| 1048.958 | 817.3851 | 608.067 | 575.582 | 0.655794651 | 0.002174 | 0.014652 | Gpn2          |
| 917.0594 | 787.0785 | 566.371 | 558.51  | 0.598573458 | 0.002197 | 0.014785 | Haus8         |
| 5026.691 | 4607.485 | 3686.62 | 3197.41 | 0.484394934 | 0.002203 | 0.014812 | Safb          |
| 476.7047 | 405.5727 | 279.711 | 243.891 | 0.749848599 | 0.002203 | 0.014812 | Itfg2         |
| 2211.121 | 1812.152 | 1427.22 | 1296.28 | 0.562035262 | 0.002205 | 0.014812 | Brip1os       |
| 2041.833 | 1873.657 | 1415.93 | 1393.84 | 0.478424691 | 0.00222  | 0.014891 | Ppat          |
| 13296.84 | 12210.86 | 9866.33 | 7975.22 | 0.515446165 | 0.00224  | 0.01501  | Kpnb1         |
| 2249.548 | 2071.541 | 1618.33 | 1408.47 | 0.512603351 | 0.002249 | 0.01505  | Ddx18         |
| 2298.361 | 1811.261 | 1190.07 | 1460.91 | 0.633119361 | 0.002253 | 0.015065 | Phactr2       |
| 547.3277 | 429.6397 | 290.135 | 291.449 | 0.74745117  | 0.002255 | 0.01507  | Gins3         |
| 3070.02  | 2954.887 | 2258.54 | 2191.36 | 0.436925942 | 0.002256 | 0.015076 | Akap8         |
| 945.1009 | 747.8583 | 531.625 | 546.315 | 0.650876265 | 0.002263 | 0.015108 | Meaf6         |
| 1664.832 | 1731.038 | 1225.69 | 1221.89 | 0.472503403 | 0.002266 | 0.015122 | Lrp6          |
| 17405.44 | 15689.87 | 11754.8 | 12703   | 0.436376266 | 0.002293 | 0.015257 | Ikzfl         |
| 2560.081 | 2298.84  | 1806.83 | 1329.2  | 0.630393757 | 0.002307 | 0.015324 | Abcf2         |
| 616.912  | 567.8018 | 403.93  | 298.766 | 0.749696766 | 0.002317 | 0.015365 | Mex3d         |
| 90.3558  | 82.00592 | 31.272  | 30.4863 | 1.479313223 | 0.002326 | 0.015407 | Zfp976        |
| 1167.355 | 862.8449 | 674.086 | 556.071 | 0.7207472   | 0.002343 | 0.0155   | Cenpx         |
| 1268.097 | 1096.383 | 834.789 | 762.158 | 0.564951898 | 0.002369 | 0.015637 | Psmc9         |
| 541.0962 | 492.0355 | 346.598 | 271.938 | 0.736344725 | 0.002388 | 0.015735 | Dusp14        |
| 4220.758 | 3630.545 | 2938.7  | 2536.46 | 0.519403574 | 0.002393 | 0.015757 | Csrp1         |
| 10.38572 | 17.82737 | 0       | 0       | 6.221286313 | 0.002399 | 0.015795 | Syn2          |
| 5910.516 | 5197.571 | 4217.38 | 3670.55 | 0.493444581 | 0.002401 | 0.015801 | Rnf187        |
| 1047.92  | 1017.052 | 666.268 | 747.525 | 0.547744524 | 0.002406 | 0.015825 | Mtr           |
| 300.1474 | 211.2544 | 124.219 | 132.92  | 0.991679066 | 0.002407 | 0.015825 | Top1mt        |
| 4556.217 | 3503.97  | 2717.19 | 2749.87 | 0.559870648 | 0.002412 | 0.01585  | Map3k11       |
| 1983.673 | 1565.243 | 1250.88 | 1067.02 | 0.61332567  | 0.002447 | 0.016048 | Timm50        |
| 3787.674 | 3203.579 | 2579.07 | 2316.96 | 0.513353225 | 0.002452 | 0.016074 | Fzr1          |
| 1637.829 | 1517.109 | 1116.24 | 1135.31 | 0.486635154 | 0.002464 | 0.016144 | Ube2q2        |
| 1405.188 | 1131.147 | 817.416 | 864.592 | 0.592514793 | 0.002465 | 0.016144 | Mrpl18        |
| 900.4423 | 828.9729 | 612.411 | 535.34  | 0.589599746 | 0.002467 | 0.016154 | Aatf          |
| 94.51009 | 75.76634 | 30.4034 | 29.2669 | 1.510298656 | 0.002493 | 0.016269 | Dmrta2        |
| 44.65861 | 32.98064 | 6.94934 | 7.31672 | 2.445011124 | 0.002502 | 0.016325 | 2900011O08Rik |
| 1658.6   | 1387.861 | 1005.92 | 1073.12 | 0.551314097 | 0.002503 | 0.016325 | Nt5c2         |
| 626.2592 | 547.3004 | 366.578 | 384.128 | 0.644702881 | 0.002505 | 0.01633  | Nbn           |
| 1828.926 | 1449.365 | 1162.28 | 935.321 | 0.642669178 | 0.002516 | 0.01639  | Scand1        |
| 604.4491 | 518.7766 | 374.396 | 317.058 | 0.69705851  | 0.002528 | 0.016451 | R3hcc1        |
| 5.192862 | 49.91665 | 0.86867 | 0       | 5.780826694 | 0.002557 | 0.016621 | Igkv8-19      |
| 730.1164 | 705.964  | 506.433 | 397.542 | 0.664851513 | 0.002561 | 0.016643 | Rpp14         |
| 951.3323 | 746.9669 | 522.069 | 558.51  | 0.652295159 | 0.002582 | 0.01676  | Hdac10        |
| 399.8504 | 363.6784 | 200.662 | 246.33  | 0.77553138  | 0.002591 | 0.016801 | Oip5          |
| 265.8745 | 273.6502 | 155.491 | 149.993 | 0.819957815 | 0.002595 | 0.016818 | Slc7a4        |
| 485.0133 | 437.662  | 296.216 | 278.035 | 0.682553447 | 0.002606 | 0.016878 | Ndufaf4       |

|          |          |         |         |             |          |          |               |
|----------|----------|---------|---------|-------------|----------|----------|---------------|
| 2068.836 | 2199.898 | 1615.72 | 1363.35 | 0.518053044 | 0.002615 | 0.016929 | Lnx2          |
| 2117.649 | 1572.374 | 1233.51 | 1162.14 | 0.622493695 | 0.002618 | 0.016937 | Fam111a       |
| 156.8244 | 220.1681 | 98.1594 | 64.631  | 1.204960447 | 0.002624 | 0.016963 | Cd70          |
| 28285.52 | 25778.38 | 20778.5 | 19917.3 | 0.409733598 | 0.002625 | 0.016963 | Hnrnpa2b1     |
| 924.3295 | 828.9729 | 606.33  | 365.836 | 0.847307213 | 0.002643 | 0.017061 | Sfn           |
| 1625.366 | 1436.886 | 1117.98 | 997.513 | 0.532423548 | 0.002648 | 0.017087 | Pitrm1        |
| 99.70295 | 106.9642 | 46.0394 | 31.7058 | 1.400363314 | 0.002655 | 0.017128 | Itpka         |
| 3173.877 | 2707.978 | 2152.56 | 2016.98 | 0.495866416 | 0.002683 | 0.017275 | Aqr           |
| 6603.243 | 6080.026 | 4623.92 | 4841.23 | 0.422285503 | 0.002684 | 0.017275 | Smc1a         |
| 2731.445 | 2072.432 | 1693.03 | 1056.05 | 0.80384398  | 0.002691 | 0.01731  | Slamf7        |
| 1228.631 | 1182.846 | 711.439 | 891.42  | 0.591058435 | 0.002695 | 0.017318 | Hook1         |
| 1250.441 | 1396.775 | 969.433 | 751.183 | 0.619975127 | 0.002697 | 0.017323 | Tnf           |
| 435.1618 | 202.3407 | 113.795 | 149.993 | 1.274563688 | 0.002716 | 0.017432 | Frat2         |
| 25409.71 | 21232.4  | 17409   | 16187   | 0.473264318 | 0.002733 | 0.017525 | Ybx1          |
| 4721.35  | 4558.459 | 3534.61 | 3454.71 | 0.40880603  | 0.002742 | 0.017571 | Zmynd8        |
| 206.6759 | 118.552  | 60.8067 | 70.7283 | 1.3069702   | 0.002762 | 0.017676 | Btbd11        |
| 4153.251 | 3577.062 | 2901.35 | 2565.73 | 0.499180488 | 0.002784 | 0.017811 | Eif4a3        |
| 1623.289 | 1375.382 | 1087.57 | 918.248 | 0.578633646 | 0.002803 | 0.017916 | Brix1         |
| 1287.83  | 1263.961 | 941.636 | 848.739 | 0.510160317 | 0.002804 | 0.017917 | Nifk          |
| 1549.55  | 1212.261 | 865.193 | 949.954 | 0.605699271 | 0.002809 | 0.017935 | Nrf1          |
| 530.7105 | 386.854  | 286.66  | 202.429 | 0.902920528 | 0.002827 | 0.018004 | Ttc21b        |
| 3248.655 | 2784.636 | 2262.01 | 1791.38 | 0.572848593 | 0.002831 | 0.018023 | Erh           |
| 206.6759 | 152.424  | 92.9474 | 48.7781 | 1.329287651 | 0.002834 | 0.018032 | Bmp1          |
| 14901.44 | 14804.74 | 11724.4 | 10747   | 0.402555384 | 0.002842 | 0.018054 | Fasn          |
| 11017.18 | 10514.58 | 8183.72 | 8252.04 | 0.389615728 | 0.002847 | 0.018076 | Hnrnph1       |
| 1409.343 | 1356.663 | 986.806 | 996.293 | 0.480024438 | 0.00285  | 0.018087 | Wdr75         |
| 57.12148 | 33.87201 | 11.2927 | 4.87781 | 2.458555599 | 0.002851 | 0.018088 | Myo1b         |
| 56.08291 | 48.13391 | 15.636  | 6.09727 | 2.228667887 | 0.002854 | 0.018103 | 2010007H06Rik |
| 438.2776 | 421.6174 | 245.833 | 284.133 | 0.700600192 | 0.002877 | 0.01824  | Gm4759        |
| 18.6943  | 8.913687 | 0       | 0       | 6.185654625 | 0.002895 | 1        | Gm2464        |
| 1471.657 | 1089.253 | 872.142 | 724.355 | 0.680089884 | 0.002908 | 0.018394 | Qdpr          |
| 210.8302 | 198.7752 | 113.795 | 99.9952 | 0.934646445 | 0.002924 | 0.018481 | Jrk           |
| 1253.557 | 937.7198 | 701.015 | 699.966 | 0.644695249 | 0.002948 | 0.018621 | Sac3d1        |
| 6465.113 | 5905.317 | 4723.81 | 4502.22 | 0.422898036 | 0.002975 | 0.018727 | Dhx15         |
| 388.4261 | 332.4805 | 229.328 | 171.943 | 0.840099369 | 0.00298  | 0.018755 | Ublcp1        |
| 1727.146 | 1467.193 | 1169.23 | 881.665 | 0.637475192 | 0.002994 | 0.018816 | Thop1         |
| 799.7008 | 686.3539 | 518.594 | 408.517 | 0.677699683 | 0.003013 | 0.018916 | Polr3h        |
| 338.5746 | 491.1441 | 251.914 | 173.162 | 0.961619713 | 0.00303  | 0.018995 | 2700081O15Rik |
| 941.9852 | 841.452  | 608.936 | 607.288 | 0.551807634 | 0.003044 | 0.019055 | Diablo        |
| 201.483  | 262.9538 | 124.219 | 49.9976 | 1.404234178 | 0.003049 | 0.019084 | Gm37233       |
| 830.8579 | 806.6886 | 521.2   | 586.557 | 0.565294101 | 0.003053 | 0.0191   | Nt5dc1        |
| 2885.154 | 2647.365 | 2112.6  | 1826.74 | 0.489149331 | 0.003055 | 0.019102 | Ahsa1         |
| 1327.296 | 1162.345 | 885.172 | 840.203 | 0.52815834  | 0.003058 | 0.019114 | Ddx56         |
| 4576.989 | 4060.184 | 2916.12 | 3298.62 | 0.47514945  | 0.003065 | 0.019145 | Rai1          |
| 824.6265 | 694.3762 | 489.06  | 508.512 | 0.606505354 | 0.003073 | 0.019185 | Mettl13       |

|          |          |         |         |             |          |          |               |
|----------|----------|---------|---------|-------------|----------|----------|---------------|
| 436.2004 | 727.3568 | 341.386 | 156.09  | 1.221871468 | 0.003077 | 0.019206 | Azin2         |
| 880.7094 | 671.2006 | 506.433 | 463.392 | 0.676593732 | 0.003087 | 0.019251 | Hgh1          |
| 1422.844 | 1312.986 | 1015.47 | 864.592 | 0.539665931 | 0.003088 | 0.019251 | Lzic          |
| 406.0818 | 326.2409 | 221.51  | 203.649 | 0.782064294 | 0.003096 | 0.019294 | Pus7l         |
| 43.62004 | 49.02528 | 13.03   | 6.09727 | 2.247701866 | 0.003119 | 0.019405 | Drc1          |
| 1758.303 | 1638.336 | 1268.25 | 1158.48 | 0.484195926 | 0.003138 | 0.019503 | Fam98b        |
| 74.77721 | 50.80801 | 20.848  | 10.9751 | 1.958337877 | 0.003145 | 0.01954  | Uaca          |
| 498.5148 | 490.2528 | 319.67  | 319.497 | 0.629345309 | 0.003152 | 0.019561 | Armex3        |
| 4462.746 | 4015.616 | 3236.66 | 2965.71 | 0.450532089 | 0.003184 | 0.019699 | Nsun2         |
| 5671.644 | 5259.075 | 4230.41 | 3887.62 | 0.428856527 | 0.003187 | 0.019705 | Fam168b       |
| 532.7877 | 443.9016 | 321.407 | 267.06  | 0.727604686 | 0.003188 | 0.019705 | Spin4         |
| 1653.407 | 1267.526 | 946.848 | 982.879 | 0.597786293 | 0.003201 | 0.019781 | Dbf4          |
| 2357.559 | 2068.867 | 1663.5  | 1306.03 | 0.574620327 | 0.003213 | 0.019843 | Ncdn          |
| 261.7202 | 270.9761 | 163.309 | 107.312 | 0.970079289 | 0.003217 | 0.019853 | Casc4         |
| 748.8107 | 548.1917 | 400.456 | 386.567 | 0.71941483  | 0.003237 | 0.019943 | Mars2         |
| 762.3122 | 735.3791 | 509.039 | 513.39  | 0.550706848 | 0.003237 | 0.019943 | Atp11c        |
| 1832.042 | 1570.592 | 1198.76 | 1197.5  | 0.505514528 | 0.003243 | 0.019973 | Cpsf4         |
| 792.4308 | 574.0414 | 429.99  | 395.103 | 0.726090863 | 0.003251 | 0.019994 | Ppp1r13l      |
| 539.0191 | 365.4612 | 219.773 | 273.158 | 0.87716845  | 0.003266 | 0.020074 | Mtfr2         |
| 958.6023 | 918.1097 | 684.51  | 575.582 | 0.572673072 | 0.00328  | 0.020149 | Noc3l         |
| 96.58723 | 17.82737 | 10.424  | 2.43891 | 3.111777652 | 0.003301 | 0.020267 | Iglc1         |
| 1473.734 | 1263.961 | 995.493 | 867.031 | 0.554270093 | 0.003317 | 0.02034  | Mrpl28        |
| 57.12148 | 64.17854 | 19.1107 | 17.0723 | 1.741751554 | 0.003318 | 0.02034  | 4933430I17Rik |
| 223.2931 | 212.1457 | 126.825 | 101.215 | 0.927985191 | 0.003322 | 0.020358 | Fads6         |
| 6685.291 | 6911.673 | 5083.44 | 5277.79 | 0.392224954 | 0.00335  | 0.020506 | Rapgef1       |
| 1286.791 | 1105.297 | 854.769 | 781.67  | 0.54648498  | 0.00335  | 0.020506 | Cdk5rap2      |
| 136.053  | 125.683  | 62.5441 | 24.3891 | 1.572738919 | 0.003357 | 0.02054  | Pax5          |
| 440.3547 | 415.3778 | 264.075 | 275.596 | 0.665558847 | 0.003393 | 0.020721 | A930004J17Rik |
| 320.9189 | 221.9508 | 151.148 | 69.5088 | 1.289254176 | 0.003406 | 0.020775 | Trim2         |
| 36.35003 | 14.2619  | 2.606   | 1.21945 | 3.676805527 | 0.003421 | 0.020854 | Zan           |
| 2367.945 | 2166.917 | 1683.48 | 1634.07 | 0.450560932 | 0.003428 | 0.020884 | Nup214        |
| 1709.49  | 1625.856 | 1237.85 | 1184.09 | 0.461153813 | 0.00343  | 0.020887 | Cebpz         |
| 880.7094 | 791.5354 | 584.613 | 551.193 | 0.556934115 | 0.003431 | 0.020887 | Ddx51         |
| 1892.279 | 1489.477 | 1118.84 | 1168.24 | 0.564107584 | 0.003434 | 0.020901 | Tshz1         |
| 1816.463 | 1567.026 | 1048.48 | 1256.04 | 0.554910287 | 0.003439 | 0.02092  | Heg1          |
| 9430.238 | 8437.696 | 6812.09 | 6558.22 | 0.418199268 | 0.00344  | 0.02092  | Ldb1          |
| 1431.153 | 1200.674 | 957.272 | 728.014 | 0.641014199 | 0.003448 | 0.020945 | Nme1          |
| 225.3702 | 195.2097 | 97.2908 | 120.726 | 0.951885745 | 0.003449 | 0.020945 | Ccdc18        |
| 2187.234 | 2283.687 | 1706.06 | 1277.99 | 0.582086351 | 0.003449 | 0.020945 | Tesc          |
| 615.8734 | 462.6203 | 335.306 | 314.619 | 0.72890271  | 0.003458 | 0.02099  | Snx30         |
| 607.5649 | 507.1888 | 330.962 | 370.714 | 0.668735616 | 0.003463 | 0.02101  | Spata51l      |
| 327.1503 | 286.1293 | 171.996 | 185.357 | 0.77998028  | 0.003464 | 0.02101  | Mir17hg       |
| 1666.909 | 1620.508 | 1247.41 | 1002.39 | 0.545658936 | 0.003475 | 0.021065 | Nop16         |
| 1362.607 | 962.6782 | 723.6   | 735.33  | 0.671978975 | 0.003481 | 0.021092 | Tfeb          |
| 371.8089 | 304.8481 | 198.056 | 197.551 | 0.773350243 | 0.00349  | 0.021122 | Mybl1         |

|          |          |         |         |             |          |          |               |
|----------|----------|---------|---------|-------------|----------|----------|---------------|
| 1208.898 | 1123.125 | 845.213 | 799.961 | 0.502516144 | 0.003492 | 0.021122 | Rsbn1         |
| 4559.333 | 3982.635 | 3271.4  | 2771.82 | 0.498640194 | 0.003533 | 0.021332 | Tra2b         |
| 4697.463 | 4162.692 | 3413.86 | 2849.86 | 0.499694907 | 0.003557 | 0.021464 | Eif6          |
| 3923.727 | 3974.613 | 2630.33 | 3097.41 | 0.464186751 | 0.00357  | 0.021533 | Gtpbp1        |
| 4898.946 | 4215.282 | 3467.72 | 3035.22 | 0.486513305 | 0.003595 | 0.021671 | Psmc3         |
| 972.1038 | 869.0844 | 662.793 | 573.143 | 0.573114569 | 0.003603 | 0.021688 | Fbxo46        |
| 634.5677 | 582.0637 | 390.032 | 414.614 | 0.597011918 | 0.003611 | 0.021731 | Fam102b       |
| 1061.421 | 788.8613 | 631.521 | 484.123 | 0.727332539 | 0.003624 | 0.021782 | Ndc1          |
| 2850.881 | 2598.34  | 1838.97 | 2087.7  | 0.473237113 | 0.003632 | 0.021814 | Syne3         |
| 4054.587 | 4693.056 | 1875.45 | 801.181 | 1.708026159 | 0.003656 | 0.021922 | Marcksl1      |
| 81.00865 | 60.61307 | 19.9794 | 25.6085 | 1.641887473 | 0.00366  | 0.021938 | Sarm1         |
| 8898.488 | 8317.361 | 6712.19 | 4881.47 | 0.570005873 | 0.003667 | 0.021951 | Cdk6          |
| 2257.856 | 1852.264 | 1507.14 | 1291.4  | 0.553418979 | 0.003669 | 0.021957 | Ruvbl1        |
| 68.54578 | 118.552  | 36.484  | 13.414  | 1.8873591   | 0.003689 | 0.022052 | Gm6904        |
| 754.0036 | 620.3926 | 463     | 423.15  | 0.631394257 | 0.003699 | 0.022104 | Timm22        |
| 201.483  | 141.7276 | 88.6041 | 64.631  | 1.155450387 | 0.003707 | 0.022136 | Per2          |
| 139.1687 | 113.2038 | 61.6754 | 30.4863 | 1.437970713 | 0.003749 | 0.022362 | Svop          |
| 13.50144 | 24.95832 | 0.86867 | 0       | 5.256790585 | 0.003758 | 0.0224   | Ighv1-9       |
| 50.89005 | 40.11159 | 12.1613 | 2.43891 | 2.589569396 | 0.003772 | 0.022467 | Gpr161        |
| 794.5079 | 958.2213 | 576.795 | 247.549 | 1.084866864 | 0.003774 | 0.022467 | Lrfn1         |
| 5791.08  | 6340.305 | 4735.98 | 3719.33 | 0.520403711 | 0.003775 | 0.022467 | Plagl2        |
| 1070.768 | 914.5443 | 715.782 | 521.926 | 0.678984714 | 0.003777 | 0.022472 | Polr2d        |
| 2725.214 | 2540.401 | 2000.54 | 1891.37 | 0.435658426 | 0.003784 | 0.022496 | Polr2b        |
| 1227.593 | 1392.318 | 916.444 | 932.882 | 0.503039387 | 0.003787 | 0.022502 | Scml4         |
| 465.2804 | 434.0965 | 53.8574 | 4.87781 | 3.928698729 | 0.00379  | 0.022511 | Xcl1          |
| 1521.509 | 1408.362 | 1071.94 | 653.627 | 0.761570052 | 0.003801 | 0.022553 | Phf5a         |
| 117.3587 | 86.46276 | 39.09   | 41.4614 | 1.339318582 | 0.003809 | 0.022588 | 1700066B19Rik |
| 1302.37  | 1170.367 | 911.232 | 798.742 | 0.530659284 | 0.003809 | 0.022588 | Gins4         |
| 3470.909 | 2626.863 | 2218.58 | 1668.21 | 0.648744887 | 0.003836 | 0.022712 | Rbm15b        |
| 1390.648 | 1222.066 | 960.746 | 838.984 | 0.536313325 | 0.003846 | 0.022762 | Mtmr4         |
| 1784.267 | 1608.92  | 1266.52 | 1152.38 | 0.487336298 | 0.003858 | 0.02281  | Rprd1b        |
| 1580.707 | 1841.568 | 1270.86 | 1085.31 | 0.537790795 | 0.003859 | 0.02281  | Gnb5          |
| 159.9402 | 179.1651 | 92.0788 | 46.3392 | 1.281057534 | 0.00386  | 0.02281  | Slc30a1       |
| 3116.756 | 2646.474 | 2150.82 | 1947.47 | 0.491200077 | 0.003869 | 0.022846 | H3f3a         |
| 2419.874 | 2090.26  | 1688.69 | 1495.05 | 0.50154662  | 0.003875 | 0.022876 | Panx1         |
| 1088.424 | 982.2883 | 758.347 | 643.871 | 0.560522793 | 0.003899 | 0.022999 | Ppp2r3d       |
| 7382.173 | 6648.719 | 5388.34 | 3588.85 | 0.643765018 | 0.003904 | 0.023023 | Tuba1a        |
| 564.9834 | 459.0549 | 309.246 | 330.472 | 0.678896643 | 0.003916 | 0.023066 | Ska3          |
| 1383.378 | 1239.002 | 973.776 | 826.789 | 0.540819505 | 0.003917 | 0.023066 | Cchcr1        |
| 2489.458 | 2138.393 | 1349.91 | 1748.7  | 0.579619973 | 0.003925 | 0.023092 | Ncapd3        |
| 833.9737 | 763.0116 | 491.666 | 575.582 | 0.583014062 | 0.003943 | 0.023176 | Tigd2         |
| 1164.24  | 1113.319 | 833.052 | 786.547 | 0.491067325 | 0.003966 | 0.023285 | Wrap73        |
| 754.0036 | 641.7854 | 438.677 | 479.245 | 0.605173783 | 0.003969 | 0.023296 | Fam234b       |
| 8433.208 | 7497.302 | 6196.21 | 5513.15 | 0.443842867 | 0.004051 | 0.023705 | Ddx21         |
| 411.2747 | 306.6308 | 224.116 | 156.09  | 0.911327499 | 0.004064 | 0.023772 | Cdh23         |

|          |          |         |         |             |          |          |               |
|----------|----------|---------|---------|-------------|----------|----------|---------------|
| 4056.664 | 3497.731 | 2846.62 | 2637.68 | 0.46155802  | 0.004082 | 0.023851 | Wbp11         |
| 1210.975 | 894.9341 | 707.964 | 634.116 | 0.648512147 | 0.00409  | 0.023881 | Hmgb3         |
| 2041.833 | 1704.297 | 1348.17 | 1286.52 | 0.507123804 | 0.004091 | 0.023881 | Noc4l         |
| 1381.301 | 1286.245 | 985.938 | 921.907 | 0.482711891 | 0.004094 | 0.023891 | Fam133b       |
| 1260.827 | 953.7645 | 777.457 | 571.924 | 0.712385634 | 0.004121 | 0.024014 | Med16         |
| 1135.16  | 1090.144 | 820.022 | 754.842 | 0.497735731 | 0.004133 | 0.024062 | Zfp444        |
| 208.7531 | 185.4047 | 112.927 | 89.0201 | 0.958945801 | 0.004137 | 0.024078 | Lhpp          |
| 2512.307 | 2462.852 | 1861.55 | 1871.86 | 0.414240657 | 0.004144 | 0.024099 | Uri1          |
| 3022.246 | 2903.188 | 2254.19 | 2205.99 | 0.409619662 | 0.004154 | 0.024126 | Tcf20         |
| 1077     | 947.5249 | 735.761 | 635.335 | 0.560434795 | 0.004156 | 0.024126 | Wdr4          |
| 95.54866 | 88.2455  | 32.1407 | 40.242  | 1.350688094 | 0.004175 | 0.024213 | Col27a1       |
| 4398.354 | 3921.131 | 3187.14 | 2948.64 | 0.438834648 | 0.0042   | 0.024346 | Smarcd2       |
| 124.6287 | 97.15918 | 52.12   | 35.3641 | 1.331016045 | 0.004207 | 0.024363 | Epha2         |
| 1505.93  | 1252.373 | 963.352 | 951.174 | 0.526250118 | 0.004207 | 0.024363 | Tubgcp2       |
| 7736.326 | 8006.273 | 6222.27 | 5771.67 | 0.392218892 | 0.004218 | 0.024417 | Tpr           |
| 1535.01  | 1517.109 | 1099.73 | 1135.31 | 0.44977306  | 0.004221 | 0.024427 | 2410002F23Rik |
| 5630.101 | 5081.693 | 4160.92 | 3762.01 | 0.434713345 | 0.004228 | 0.024457 | Zmat3         |
| 2586.045 | 2207.029 | 1672.18 | 1766.99 | 0.478926295 | 0.004235 | 0.024479 | Hspa14        |
| 613.7963 | 609.6962 | 413.486 | 413.395 | 0.565219222 | 0.004267 | 0.024631 | Bhlhb9        |
| 663.6478 | 445.6843 | 338.78  | 298.766 | 0.796755811 | 0.00428  | 0.024687 | Mecr          |
| 3573.728 | 3228.537 | 2639.01 | 2170.63 | 0.49928386  | 0.004281 | 0.024687 | Chtf8         |
| 1903.703 | 1623.182 | 1294.31 | 1192.63 | 0.503145864 | 0.004281 | 0.024687 | Cstf2         |
| 4258.147 | 3733.943 | 2809.27 | 3046.19 | 0.44893467  | 0.00429  | 0.02473  | Cpsf1         |
| 1212.014 | 1035.77  | 707.095 | 818.253 | 0.560247925 | 0.004329 | 0.024909 | Zfp362        |
| 455.9333 | 532.1471 | 322.276 | 308.522 | 0.647452384 | 0.004335 | 0.024932 | Atp9a         |
| 1925.513 | 1931.596 | 1429.83 | 1438.95 | 0.427141384 | 0.004351 | 0.024999 | Gng2          |
| 3325.509 | 2839.901 | 2345.4  | 1982.83 | 0.509606505 | 0.004361 | 0.025023 | Ranbp3        |
| 72.70007 | 82.00592 | 32.1407 | 17.0723 | 1.635127372 | 0.004374 | 0.025072 | Fam110b       |
| 4477.286 | 3565.475 | 2931.75 | 2721.82 | 0.508114587 | 0.004393 | 0.025148 | Mogs          |
| 7283.508 | 6678.134 | 5392.69 | 5200.97 | 0.398105852 | 0.00442  | 0.025289 | Map4          |
| 445.5476 | 327.1323 | 209.349 | 235.354 | 0.79759278  | 0.00442  | 0.025289 | Fam83d        |
| 142.2844 | 152.424  | 78.1801 | 62.1921 | 1.064710231 | 0.004435 | 0.025346 | Acot2         |
| 749.8493 | 558.8882 | 423.91  | 387.786 | 0.687333583 | 0.004447 | 0.025381 | Sars2         |
| 1538.126 | 2022.516 | 1031.98 | 1281.65 | 0.623353462 | 0.004453 | 0.025404 | Ptgfrn        |
| 6167.043 | 5026.428 | 3497.26 | 4248.58 | 0.531426431 | 0.004469 | 0.025449 | Smc4          |
| 1025.071 | 923.4579 | 560.291 | 719.477 | 0.608448394 | 0.00447  | 0.02545  | Urb1          |
| 1264.981 | 1052.706 | 799.174 | 797.522 | 0.537080669 | 0.00448  | 0.025494 | Polrmt        |
| 3631.888 | 3805.253 | 2923.07 | 2551.1  | 0.441629474 | 0.004503 | 0.025593 | Tmem109       |
| 5197.016 | 4779.519 | 3796.95 | 3760.79 | 0.400456909 | 0.004516 | 0.025647 | Paics         |
| 386.3489 | 321.7841 | 211.955 | 214.624 | 0.730543616 | 0.004526 | 0.025693 | Asfla         |
| 3383.669 | 2994.107 | 2463.54 | 1981.61 | 0.519932256 | 0.00453  | 0.025703 | Slc35a4       |
| 5339.301 | 4558.459 | 3667.51 | 3610.8  | 0.443306378 | 0.004542 | 0.025733 | Gspt1         |
| 1362.607 | 1308.529 | 1008.52 | 890.201 | 0.491174454 | 0.004577 | 0.025897 | Phtfl         |
| 541.0962 | 463.5117 | 330.094 | 313.399 | 0.641144804 | 0.004581 | 0.025897 | Dtd1          |
| 645.992  | 576.7155 | 423.91  | 381.689 | 0.599985357 | 0.004582 | 0.025897 | Cobll1        |

|          |          |         |         |             |          |          |               |
|----------|----------|---------|---------|-------------|----------|----------|---------------|
| 2673.285 | 2241.792 | 1652.21 | 1830.4  | 0.497288409 | 0.004584 | 0.025897 | Med14         |
| 3666.161 | 2999.456 | 2476.57 | 2229.16 | 0.501732541 | 0.004586 | 0.025899 | Ctcf          |
| 577.4463 | 570.4759 | 404.799 | 346.325 | 0.609553907 | 0.004604 | 0.025979 | Mkl2          |
| 6883.658 | 6850.168 | 5469.13 | 4386.37 | 0.478319028 | 0.00464  | 0.026157 | Hdac1         |
| 1508.007 | 1580.397 | 1162.28 | 1088.97 | 0.45568717  | 0.004688 | 0.026392 | Ift140        |
| 1570.321 | 1433.321 | 1109.29 | 1064.58 | 0.465834487 | 0.004723 | 0.026533 | Zfp664        |
| 61.27577 | 47.24254 | 18.242  | 8.53617 | 1.992769198 | 0.004731 | 0.02656  | Prdm8         |
| 630.4135 | 526.7989 | 391.769 | 351.203 | 0.63710204  | 0.00474  | 0.026598 | Tns1          |
| 1315.871 | 1093.709 | 879.092 | 730.453 | 0.580312564 | 0.004745 | 0.026604 | Mcrs1         |
| 1380.263 | 1616.943 | 1119.71 | 880.445 | 0.582315776 | 0.004746 | 0.026604 | Rfc3          |
| 8570.3   | 6671.003 | 5635.05 | 4994.88 | 0.519571513 | 0.004747 | 0.026604 | Ptprcap       |
| 139.1687 | 104.2901 | 59.9381 | 34.1447 | 1.358169835 | 0.004762 | 0.026675 | Xylb          |
| 7122.53  | 5124.478 | 4243.44 | 4030.29 | 0.565590194 | 0.004771 | 0.026703 | Ssbp4         |
| 1671.063 | 1621.4   | 1265.65 | 1064.58 | 0.497387252 | 0.004778 | 0.026712 | Llgl1         |
| 2405.334 | 1999.34  | 1654.81 | 1354.81 | 0.548292057 | 0.004848 | 0.027089 | Letm1         |
| 1091.54  | 938.6112 | 730.549 | 662.163 | 0.542254157 | 0.004856 | 0.027119 | Dis3          |
| 3222.69  | 2796.224 | 2312.39 | 1934.05 | 0.502392633 | 0.004861 | 0.027135 | Banfl         |
| 1324.18  | 1329.031 | 1007.65 | 878.006 | 0.491436031 | 0.004866 | 0.027156 | Dalrd3        |
| 490.2062 | 439.4448 | 297.953 | 302.424 | 0.630539143 | 0.004868 | 0.02716  | Qtrt2         |
| 561.8677 | 430.5311 | 324.882 | 271.938 | 0.730464133 | 0.004894 | 0.027274 | Dhodh         |
| 876.5551 | 798.6663 | 613.279 | 497.537 | 0.590249061 | 0.004926 | 0.027426 | Chchd4        |
| 1007.415 | 787.0785 | 491.666 | 635.335 | 0.672607402 | 0.004947 | 0.027514 | Ccdc61        |
| 1082.192 | 1071.425 | 806.123 | 575.582 | 0.637858699 | 0.004947 | 0.027514 | Zdhhc2        |
| 2640.051 | 2295.274 | 1864.16 | 1701.14 | 0.468413092 | 0.00495  | 0.027521 | Lrba          |
| 397.7732 | 295.9344 | 158.097 | 219.502 | 0.880991592 | 0.004975 | 0.02764  | 4933404O12Rik |
| 3471.948 | 3461.185 | 2740.65 | 2248.67 | 0.473934671 | 0.004989 | 0.027699 | Gabpb2        |
| 63.35292 | 49.91665 | 18.242  | 3.65836 | 2.330042236 | 0.005031 | 0.027888 | B3galt5       |
| 34.27289 | 15.15327 | 2.606   | 2.43891 | 3.284957941 | 0.005037 | 0.027906 | Gm6257        |
| 2041.833 | 1717.667 | 1385.52 | 1275.55 | 0.497694336 | 0.005061 | 0.028032 | Atp5g1        |
| 3664.083 | 3303.412 | 2647.7  | 2565.73 | 0.418117841 | 0.005102 | 0.028212 | Tcerg1        |
| 19.73288 | 15.15327 | 0.86867 | 0       | 5.112926627 | 0.005102 | 0.028212 | Gabra4        |
| 516.1705 | 403.79   | 304.034 | 176.821 | 0.930313469 | 0.005107 | 0.028229 | Ank           |
| 392.5804 | 377.9403 | 259.732 | 212.185 | 0.703693705 | 0.005163 | 0.028489 | Thg1l         |
| 906.6737 | 828.9729 | 639.339 | 518.268 | 0.581906614 | 0.005202 | 0.028692 | Ydjc          |
| 18981.99 | 16632.94 | 13970.8 | 12525   | 0.426591158 | 0.005241 | 0.028867 | Eif4g1        |
| 5216.749 | 4523.696 | 3695.31 | 3531.54 | 0.430346174 | 0.005249 | 0.028879 | Got2          |
| 104.8958 | 88.2455  | 39.9587 | 40.242  | 1.267136085 | 0.00525  | 0.028879 | Wfikkn1       |
| 3654.736 | 3164.359 | 2526.09 | 2507.2  | 0.43785878  | 0.005255 | 0.028884 | Kmt5a         |
| 606.5263 | 563.345  | 409.142 | 241.452 | 0.841878871 | 0.005257 | 0.02889  | Hpcal4        |
| 2397.025 | 2250.706 | 1809.43 | 1402.37 | 0.531923869 | 0.005262 | 0.028904 | Arpp19        |
| 386.3489 | 305.7395 | 218.904 | 182.918 | 0.780520797 | 0.005283 | 0.028992 | Psmc3ip       |
| 9.347152 | 14.2619  | 0       | 0       | 5.963885631 | 0.005294 | 1        | H19           |
| 3860.374 | 3624.305 | 2943.91 | 2630.36 | 0.424619656 | 0.0053   | 0.029063 | Map3k7        |
| 579.5234 | 465.2944 | 354.416 | 284.133 | 0.706892786 | 0.005304 | 0.029079 | Faap24        |
| 1142.43  | 892.26   | 728.812 | 565.826 | 0.64990396  | 0.005306 | 0.029079 | Urm1          |

|          |          |         |         |             |          |          |           |
|----------|----------|---------|---------|-------------|----------|----------|-----------|
| 61.27577 | 96.26782 | 29.5347 | 24.3891 | 1.543439574 | 0.00533  | 0.02918  | Hmgb1-ps8 |
| 1154.893 | 1072.317 | 811.335 | 785.328 | 0.4795676   | 0.005343 | 0.029231 | Cenpt     |
| 714.5378 | 535.7126 | 410.88  | 369.494 | 0.677927685 | 0.005386 | 0.029433 | Cep128    |
| 3074.174 | 2894.274 | 2294.15 | 2213.31 | 0.404738547 | 0.005387 | 0.029433 | Prr12     |
| 899.4037 | 767.4684 | 567.24  | 573.143 | 0.547193502 | 0.005402 | 0.029491 | Pimreg    |
| 1690.796 | 1480.563 | 1001.57 | 1202.38 | 0.525953071 | 0.005409 | 0.029511 | Ttf2      |
| 1009.492 | 968.9177 | 740.105 | 536.559 | 0.629343873 | 0.005422 | 0.029572 | Lsm7      |
| 298.0703 | 237.1041 | 162.441 | 134.14  | 0.847025892 | 0.005429 | 0.0296   | Plekha8   |
| 1230.708 | 1163.236 | 894.728 | 824.35  | 0.476738036 | 0.005507 | 0.029986 | Yeats4    |
| 675.0721 | 490.2528 | 368.315 | 348.764 | 0.698942062 | 0.005529 | 0.030065 | Dohh      |
| 643.9149 | 853.9312 | 110.321 | 12.1945 | 3.607850654 | 0.005534 | 0.030071 | Il2       |
| 1923.436 | 1882.571 | 1480.21 | 1275.55 | 0.46478369  | 0.005545 | 0.03011  | Wdr3      |
| 1287.83  | 1169.476 | 175.471 | 18.2918 | 3.66218774  | 0.005552 | 0.030137 | Shtn1     |
| 1431.153 | 1076.773 | 746.185 | 887.762 | 0.618738218 | 0.005569 | 0.030222 | Cep55     |
| 1084.27  | 883.3463 | 689.722 | 645.091 | 0.55859901  | 0.005599 | 0.030366 | Gtf3c5    |
| 340.6518 | 225.5163 | 163.309 | 130.482 | 0.941676193 | 0.005617 | 0.030439 | Caskin2   |
| 20.77145 | 14.2619  | 0       | 1.21945 | 5.057954823 | 0.005626 | 0.030458 | Gm10344   |
| 1135.16  | 999.2243 | 767.033 | 738.989 | 0.502281298 | 0.00567  | 0.030664 | Papd7     |
| 21343.7  | 18566.32 | 15318.1 | 14873.7 | 0.402535614 | 0.005683 | 0.030726 | Hnrnpu    |
| 529.6719 | 439.4448 | 313.589 | 306.083 | 0.64399159  | 0.005687 | 0.030736 | Akr7a5    |
| 1205.783 | 1145.409 | 892.99  | 735.33  | 0.528183092 | 0.005708 | 0.030831 | Camsap1   |
| 5281.141 | 4162.692 | 3336.55 | 3396.18 | 0.488046741 | 0.005731 | 0.030932 | Gm6793    |
| 11652.78 | 10723.17 | 8863.01 | 8232.53 | 0.388171879 | 0.005742 | 0.030971 | Fus       |
| 719.7307 | 575.8242 | 438.677 | 401.2   | 0.62348523  | 0.005749 | 0.030989 | Pycrl     |
| 1764.535 | 1524.24  | 1210.92 | 1152.38 | 0.476042146 | 0.005751 | 0.030989 | Bysl      |
| 5470.161 | 4890.94  | 4058.41 | 3643.73 | 0.427440049 | 0.005776 | 0.031092 | Dynll2    |
| 5041.231 | 4144.864 | 3488.57 | 3085.22 | 0.482252486 | 0.005806 | 0.031245 | Lrrc59    |
| 51.92862 | 29.41517 | 10.424  | 6.09727 | 2.276380324 | 0.005864 | 0.031536 | Six4      |
| 113.2044 | 78.44044 | 40.8274 | 34.1447 | 1.347276566 | 0.005867 | 0.031538 | Nhsl1     |
| 61.27577 | 57.93896 | 19.1107 | 2.43891 | 2.425468257 | 0.005892 | 0.031632 | Slc6a17   |
| 121.513  | 156.8809 | 66.0187 | 17.0723 | 1.72712746  | 0.005918 | 0.031761 | Cacna1c   |
| 21262.69 | 19337.35 | 16218   | 12111.6 | 0.51900334  | 0.005933 | 0.031823 | Hsp90aa1  |
| 364.5389 | 338.7201 | 225.854 | 214.624 | 0.673607904 | 0.00594  | 0.031846 | Wdsub1    |
| 1726.107 | 1694.492 | 1329.93 | 1048.73 | 0.522631304 | 0.005942 | 0.031846 | Morc2a    |
| 205.6373 | 278.107  | 136.381 | 126.823 | 0.878091722 | 0.005958 | 0.031926 | Rims3     |
| 1242.133 | 1009.029 | 815.679 | 701.186 | 0.56788253  | 0.005964 | 0.031946 | Zfp282    |
| 138.1301 | 134.5967 | 72.9681 | 34.1447 | 1.334082082 | 0.005968 | 0.031946 | Ica1      |
| 40.50432 | 26.74106 | 7.81801 | 3.65836 | 2.516488288 | 0.005991 | 0.032045 | Col5a2    |
| 1404.15  | 1131.147 | 922.525 | 791.425 | 0.563272243 | 0.005997 | 0.032069 | Aifm1     |
| 4735.89  | 4401.578 | 3631.03 | 2870.59 | 0.490346345 | 0.006009 | 0.032123 | Nop56     |
| 418.5447 | 441.2275 | 297.953 | 199.99  | 0.783176659 | 0.006029 | 0.032207 | Rab23     |
| 3020.169 | 2970.04  | 2291.54 | 2290.13 | 0.386695215 | 0.00604  | 0.032241 | Naa15     |
| 746.7336 | 498.2751 | 407.405 | 301.205 | 0.809750076 | 0.006041 | 0.032241 | Gm4617    |
| 2005.483 | 1966.359 | 1544.49 | 1393.84 | 0.434041582 | 0.006041 | 0.032241 | Josd1     |
| 3439.752 | 2937.951 | 2448.77 | 2147.46 | 0.471894578 | 0.006053 | 0.032296 | Ddx54     |



|          |          |         |         |             |          |          |               |
|----------|----------|---------|---------|-------------|----------|----------|---------------|
| 10013.92 | 10334.53 | 8217.59 | 7077.71 | 0.411617349 | 0.006062 | 0.032321 | Dock2         |
| 117.3587 | 87.35413 | 48.6454 | 24.3891 | 1.470405271 | 0.006064 | 0.032322 | Tcf7l1        |
| 979.3738 | 883.3463 | 681.904 | 619.482 | 0.515931246 | 0.006079 | 0.032387 | Thap7         |
| 2078.183 | 1452.931 | 1045.88 | 1229.21 | 0.634478304 | 0.006094 | 0.03245  | Selenoh       |
| 1990.943 | 1624.074 | 1282.15 | 1279.21 | 0.496697085 | 0.006152 | 0.032689 | Nup107        |
| 657.4163 | 495.601  | 328.356 | 386.567 | 0.69054249  | 0.006153 | 0.032689 | Slc9b2        |
| 313.6489 | 261.171  | 134.643 | 185.357 | 0.849545182 | 0.006183 | 0.032816 | Rps3a3        |
| 111.1272 | 93.59371 | 42.5647 | 46.3392 | 1.204723875 | 0.006198 | 0.032884 | Dixdc1        |
| 420.6218 | 391.3108 | 238.015 | 276.816 | 0.659496121 | 0.006205 | 0.032899 | Ccdc85c       |
| 1179.818 | 1082.122 | 418.698 | 134.14  | 2.030846108 | 0.00621  | 0.032911 | Cxcr3         |
| 336.4975 | 347.6338 | 217.167 | 213.404 | 0.66785765  | 0.006218 | 0.032942 | Nup43         |
| 838.1279 | 777.2735 | 556.816 | 578.021 | 0.509595209 | 0.006241 | 0.033028 | Enkd1         |
| 2129.073 | 1839.785 | 1477.6  | 1408.47 | 0.459018314 | 0.006241 | 0.033028 | No19          |
| 2304.592 | 1946.749 | 1620.93 | 1341.4  | 0.520020225 | 0.006243 | 0.033028 | Nubp2         |
| 7.270007 | 16.04464 | 0       | 0       | 5.946874164 | 0.006246 | 1        | Rtl1          |
| 1504.891 | 1386.078 | 1106.68 | 951.174 | 0.489019821 | 0.006279 | 0.033181 | Dgcr8         |
| 7628.314 | 7049.835 | 5880.01 | 4879.03 | 0.447737912 | 0.006312 | 0.033299 | Cct3          |
| 118.3973 | 106.0729 | 54.7261 | 46.3392 | 1.146017285 | 0.006335 | 0.033378 | 4933440N22Rik |
| 2044.949 | 1934.27  | 1556.65 | 1253.6  | 0.500502765 | 0.006341 | 0.033397 | Clcn3         |
| 1326.257 | 1095.492 | 866.061 | 823.131 | 0.518797785 | 0.006431 | 0.033819 | Rbmx          |
| 325.0732 | 341.3942 | 224.116 | 165.846 | 0.768524043 | 0.006451 | 0.0339   | Fndc9         |
| 5118.085 | 4239.349 | 3566.75 | 3213.26 | 0.464395373 | 0.006472 | 0.033988 | Dazap1        |
| 92.43295 | 76.65771 | 32.1407 | 35.3641 | 1.326503201 | 0.006527 | 0.034246 | Kcnb1         |
| 4049.394 | 4024.53  | 3212.33 | 2946.2  | 0.390318214 | 0.006532 | 0.034259 | Belaf1        |
| 2021.062 | 2142.85  | 1587.92 | 1540.17 | 0.412570713 | 0.00655  | 0.034332 | Slc20a1       |
| 1827.887 | 1858.504 | 1430.7  | 1304.82 | 0.429737768 | 0.006561 | 0.034377 | Btaf1         |
| 2950.584 | 2510.986 | 2053.53 | 1941.37 | 0.45065079  | 0.006598 | 0.034514 | Dnajb1        |
| 994.9524 | 879.7809 | 644.551 | 675.577 | 0.506114084 | 0.006602 | 0.034528 | Wdr12         |
| 4075.358 | 3832.885 | 3076.82 | 2985.22 | 0.383335848 | 0.00662  | 0.034596 | Slc7a1        |
| 1219.284 | 1055.381 | 761.821 | 838.984 | 0.507346082 | 0.006623 | 0.0346   | Polh          |
| 5127.432 | 4700.187 | 3890.76 | 3510.81 | 0.408603827 | 0.006679 | 0.034847 | Psm7          |
| 2686.787 | 2239.118 | 1884.14 | 1552.36 | 0.518417934 | 0.006681 | 0.034847 | Snu13         |
| 1783.229 | 1813.935 | 1406.37 | 1057.27 | 0.544609638 | 0.006735 | 0.035105 | Ube3c         |
| 2309.785 | 2527.922 | 1777.29 | 1851.13 | 0.415406152 | 0.006743 | 0.035136 | Relb          |
| 6098.497 | 5510.441 | 4253    | 4559.54 | 0.397709917 | 0.006745 | 0.035136 | Gtf3c1        |
| 712.4607 | 683.6798 | 509.908 | 446.32  | 0.544077504 | 0.006758 | 0.035187 | Rev1          |
| 4375.506 | 3585.085 | 2936.1  | 2865.72 | 0.456099295 | 0.006765 | 0.035205 | Nans          |
| 652.2235 | 451.0325 | 291.872 | 360.958 | 0.758177276 | 0.006769 | 0.035209 | Mis18bp1      |
| 2393.909 | 2248.923 | 1818.99 | 1614.56 | 0.434486047 | 0.006773 | 0.035209 | Ube2o         |
| 437.239  | 424.2915 | 284.923 | 281.694 | 0.604162469 | 0.006774 | 0.035209 | Slc22a15      |
| 2680.555 | 2790.875 | 2167.33 | 1885.27 | 0.43243107  | 0.006805 | 0.035349 | Zfp609        |
| 1716.76  | 1621.4   | 1247.41 | 1242.62 | 0.422700577 | 0.006837 | 0.035483 | Impa1         |
| 5532.475 | 5040.69  | 4180.9  | 3805.91 | 0.404352546 | 0.006838 | 0.035483 | Eif3l         |
| 12074.44 | 10359.49 | 8757.04 | 7983.76 | 0.422132916 | 0.006844 | 0.035494 | Set           |
| 526.5562 | 336.9374 | 259.732 | 225.599 | 0.828408557 | 0.006902 | 0.035745 | Arhgap10      |

|          |          |         |         |             |          |          |               |
|----------|----------|---------|---------|-------------|----------|----------|---------------|
| 354.1532 | 337.8287 | 224.985 | 212.185 | 0.661143674 | 0.006915 | 0.0358   | Npdc1         |
| 431.0076 | 379.7231 | 254.52  | 265.841 | 0.639839179 | 0.006947 | 0.035957 | Lin9          |
| 898.3651 | 769.2512 | 614.148 | 469.49  | 0.619086544 | 0.006963 | 0.036019 | Mrpl49        |
| 1312.756 | 1161.453 | 911.232 | 868.251 | 0.474696057 | 0.006987 | 0.03613  | Mrps26        |
| 2189.311 | 1928.922 | 1565.34 | 1457.25 | 0.445538777 | 0.007008 | 0.036224 | Sh3bgrl       |
| 36.35003 | 21.39285 | 5.212   | 0       | 3.373043409 | 0.007027 | 0.036292 | Gm44169       |
| 2172.693 | 1821.066 | 1529.72 | 1190.19 | 0.552815164 | 0.007029 | 0.036292 | Imp4          |
| 2445.838 | 2066.193 | 1669.58 | 813.375 | 0.86020906  | 0.00703  | 0.036292 | Gfod1         |
| 160.9787 | 148.8586 | 85.1294 | 74.3867 | 0.953996487 | 0.007075 | 0.03648  | Ctnnbip1      |
| 811.1251 | 581.1724 | 447.364 | 432.906 | 0.660240813 | 0.007096 | 0.036553 | Cby1          |
| 341.6903 | 263.8451 | 192.844 | 146.334 | 0.830844342 | 0.007145 | 0.03676  | Trim65        |
| 1303.408 | 1168.584 | 922.525 | 857.276 | 0.472947391 | 0.007163 | 0.03684  | 2810004N23Rik |
| 7.270007 | 28.5238  | 0.86867 | 0       | 5.158548887 | 0.007189 | 0.036947 | Ighv1-22      |
| 2839.457 | 2499.398 | 1978.82 | 2006    | 0.421870985 | 0.007228 | 0.037139 | Smc6          |
| 1282.637 | 1074.991 | 831.315 | 834.106 | 0.500997937 | 0.007237 | 0.037173 | Tfam          |
| 356.2303 | 336.046  | 224.985 | 213.404 | 0.657792765 | 0.007242 | 0.037183 | Fastkd2       |
| 2191.388 | 1891.484 | 1491.5  | 1506.02 | 0.445581459 | 0.007244 | 0.037183 | Cbx1          |
| 15.57859 | 16.936   | 0       | 1.21945 | 4.950750726 | 0.007267 | 0.037266 | Ankrd34b      |
| 947.178  | 1079.447 | 727.943 | 713.38  | 0.491898829 | 0.00728  | 0.037299 | Dexi          |
| 1020.917 | 1017.052 | 703.621 | 767.036 | 0.471642206 | 0.007289 | 0.037331 | Cep57         |
| 3798.059 | 3216.058 | 2700.69 | 2413.3  | 0.455230996 | 0.007302 | 0.037372 | Puf60         |
| 720.7693 | 694.3762 | 523.806 | 362.178 | 0.672117789 | 0.007323 | 0.037468 | Grk5          |
| 16.61716 | 6.239581 | 0       | 0       | 5.912583029 | 0.007329 | 1        | Kcnv1         |
| 6229.357 | 5299.187 | 4458    | 4092.49 | 0.430808186 | 0.007336 | 0.037526 | Pa2g4         |
| 2629.665 | 2538.618 | 1911.94 | 2020.63 | 0.394481319 | 0.00736  | 0.037604 | Sec24b        |
| 1741.686 | 1459.171 | 1212.66 | 1006.05 | 0.527289125 | 0.007361 | 0.037604 | Oat           |
| 1839.312 | 2096.499 | 1519.3  | 1307.25 | 0.47697577  | 0.007367 | 0.037622 | Zfp512b       |
| 270.0288 | 231.7559 | 158.966 | 121.945 | 0.831317026 | 0.007414 | 0.037827 | Gm7730        |
| 881.748  | 631.089  | 388.294 | 526.804 | 0.726925899 | 0.007437 | 0.037909 | Ckap2         |
| 36.35003 | 56.15623 | 13.8987 | 2.43891 | 2.457406966 | 0.007457 | 0.038001 | Sema3c        |
| 2875.807 | 2690.151 | 2044.84 | 2175.5  | 0.399492071 | 0.007523 | 0.038285 | Stk39         |
| 476.7047 | 522.342  | 352.679 | 301.205 | 0.609544081 | 0.007527 | 0.03829  | Hyal2         |
| 359.3461 | 348.5251 | 233.672 | 109.751 | 1.036309904 | 0.007588 | 0.038583 | Hmgn3         |
| 1447.77  | 1306.746 | 1030.24 | 982.879 | 0.451651329 | 0.007601 | 0.038624 | Ccne1         |
| 1622.25  | 1525.132 | 1193.55 | 1148.72 | 0.425735601 | 0.007609 | 0.038637 | Cstfl         |
| 3580.998 | 3347.981 | 2632.93 | 2685.24 | 0.381702575 | 0.007652 | 0.038807 | Srsf10        |
| 333.3817 | 294.1517 | 194.582 | 193.893 | 0.691122622 | 0.007658 | 0.038825 | Cenpk         |
| 1912.012 | 1780.063 | 1448.94 | 1171.89 | 0.493049705 | 0.00766  | 0.038826 | Ppp1r8        |
| 3018.091 | 2766.808 | 2286.33 | 1632.85 | 0.560656673 | 0.007677 | 0.038897 | Dynll1        |
| 9178.903 | 9370.959 | 7553.06 | 6509.44 | 0.39931849  | 0.007682 | 0.038914 | Sptan1        |
| 20.77145 | 22.28422 | 0.86867 | 3.65836 | 3.326514044 | 0.007722 | 0.0391   | Egfros        |
| 849.5522 | 773.708  | 602.855 | 387.786 | 0.709074437 | 0.007737 | 0.039153 | Nfyc          |
| 5384.998 | 4550.437 | 3867.31 | 3404.71 | 0.44977328  | 0.007746 | 0.039184 | Upf1          |
| 191.0973 | 171.1428 | 100.765 | 97.5563 | 0.86766803  | 0.00777  | 0.039281 | Mdk           |
| 677.1492 | 427.857  | 275.368 | 353.641 | 0.814112144 | 0.007781 | 0.039328 | Parpbp        |

|          |          |         |         |             |          |          |          |
|----------|----------|---------|---------|-------------|----------|----------|----------|
| 2165.423 | 2003.797 | 1630.49 | 1451.15 | 0.435188612 | 0.007814 | 0.039474 | Carm1    |
| 1450.886 | 1317.443 | 1070.2  | 841.423 | 0.532398348 | 0.007826 | 0.039505 | Noct     |
| 2700.288 | 3006.587 | 1959.71 | 2247.45 | 0.440624457 | 0.007836 | 0.039541 | Grap2    |
| 413.3518 | 342.2856 | 224.985 | 247.549 | 0.677994808 | 0.007847 | 0.039584 | Scrn2    |
| 1311.717 | 1284.462 | 978.988 | 945.076 | 0.431803795 | 0.007889 | 0.039763 | Ctdp1    |
| 137.0916 | 174.7083 | 88.6041 | 49.9976 | 1.160155312 | 0.007944 | 0.039998 | Ciita    |
| 3377.438 | 3106.42  | 2586.02 | 2058.44 | 0.480472024 | 0.007948 | 0.039998 | Rnf126   |
| 2576.698 | 2034.995 | 1731.25 | 1479.2  | 0.521564168 | 0.007949 | 0.039998 | Snrpa    |
| 1111.272 | 881.5636 | 641.077 | 713.38  | 0.557449741 | 0.007973 | 0.040085 | Larp1b   |
| 1893.318 | 1914.66  | 1483.68 | 1382.86 | 0.409202212 | 0.007979 | 0.0401   | Xpo5     |
| 3394.055 | 3639.458 | 2545.2  | 2791.33 | 0.398843041 | 0.007988 | 0.040135 | Sema4a   |
| 2032.486 | 1903.963 | 1553.18 | 1249.94 | 0.488568241 | 0.008032 | 0.040339 | Hras     |
| 96.58723 | 81.11455 | 40.8274 | 13.414  | 1.689343972 | 0.008034 | 0.040339 | Nsg1     |
| 528.6334 | 496.4923 | 362.234 | 324.375 | 0.576209501 | 0.008113 | 0.040662 | Qsox2    |
| 15187.04 | 13407.97 | 11048.6 | 10969   | 0.37705254  | 0.008135 | 0.04076  | Prpf8    |
| 1069.73  | 984.071  | 754.872 | 731.672 | 0.46568826  | 0.008159 | 0.040854 | Polr3b   |
| 52.96719 | 48.13391 | 18.242  | 6.09727 | 2.022057554 | 0.008209 | 0.041051 | Scn3b    |
| 533.8262 | 574.9328 | 398.718 | 236.574 | 0.799091678 | 0.008235 | 0.041171 | Iba57    |
| 60.2372  | 108.747  | 35.6154 | 20.7307 | 1.574004322 | 0.00824  | 0.041184 | Arhgef19 |
| 1174.625 | 1107.08  | 818.285 | 853.617 | 0.448875038 | 0.008254 | 0.041224 | Capn15   |
| 513.0548 | 410.0296 | 290.135 | 301.205 | 0.642096691 | 0.008273 | 0.041297 | Akip1    |
| 267.9517 | 237.1041 | 145.936 | 154.871 | 0.748157333 | 0.008295 | 0.041358 | Tango6   |
| 1632.636 | 986.7451 | 874.748 | 679.235 | 0.751694323 | 0.008299 | 0.041358 | DHR SX   |
| 19.73288 | 11.58779 | 0.86867 | 0       | 4.958195107 | 0.008301 | 0.041358 | Ighv8-12 |
| 1520.47  | 1392.318 | 1043.27 | 1106.04 | 0.438792018 | 0.008312 | 0.041401 | Cdca7l   |
| 729.0778 | 947.5249 | 596.775 | 304.863 | 0.891961008 | 0.008338 | 0.041493 | Fscn1    |
| 36.35003 | 27.63243 | 7.81801 | 1.21945 | 2.761098218 | 0.008349 | 0.041535 | Adad1    |
| 467.3576 | 369.0266 | 220.642 | 285.352 | 0.727631806 | 0.008363 | 0.041589 | Depdc1a  |
| 32.19574 | 22.28422 | 4.34334 | 4.87781 | 2.566524893 | 0.008367 | 0.041596 | S100a2   |
| 1695.989 | 1556.33  | 1251.75 | 1148.72 | 0.437257123 | 0.008381 | 0.041611 | Rrn3     |
| 2585.007 | 2034.995 | 1752.1  | 1406.03 | 0.547715063 | 0.008383 | 0.041611 | Tbfg4    |
| 4048.355 | 3494.165 | 2924.8  | 2692.55 | 0.42469126  | 0.008383 | 0.041611 | Bcor     |
| 1780.113 | 1590.202 | 1289.97 | 1184.09 | 0.445108231 | 0.008385 | 0.041611 | Pum3     |
| 1613.942 | 1580.397 | 1222.22 | 1179.21 | 0.411246014 | 0.008397 | 0.041656 | Tmem87a  |
| 2318.094 | 3257.061 | 2034.42 | 1665.77 | 0.591116963 | 0.008412 | 0.041703 | Tspan3   |
| 778.9293 | 710.4208 | 399.587 | 558.51  | 0.639262838 | 0.008423 | 0.04175  | Plekha7  |
| 7819.412 | 7156.799 | 5955.58 | 5599.73 | 0.37391213  | 0.008431 | 0.041776 | Sf3b2    |
| 1269.135 | 1043.793 | 806.123 | 824.35  | 0.504108897 | 0.008467 | 0.041912 | Haus6    |
| 13027.85 | 13220.78 | 10517.8 | 10264.1 | 0.336879973 | 0.008471 | 0.041921 | Zc3h12d  |
| 5054.732 | 4539.741 | 3846.46 | 3131.56 | 0.458798395 | 0.00852  | 0.042126 | Dctn1    |
| 11537.5  | 10950.46 | 9155.76 | 6902.11 | 0.485588471 | 0.008539 | 0.042178 | Tfrc     |
| 4856.365 | 4389.991 | 3706.6  | 3102.29 | 0.440891756 | 0.008546 | 0.042191 | Jpt1     |
| 735.3093 | 690.8107 | 500.352 | 507.293 | 0.501029965 | 0.00855  | 0.042197 | Klhl42   |
| 1165.278 | 996.5502 | 768.771 | 773.133 | 0.487122574 | 0.008553 | 0.042198 | Cep295   |
| 2361.714 | 2113.435 | 1739.94 | 1577.97 | 0.430881928 | 0.008586 | 0.04231  | Gpr174   |

|          |          |         |         |             |          |          |               |
|----------|----------|---------|---------|-------------|----------|----------|---------------|
| 889.018  | 750.5324 | 595.906 | 528.023 | 0.542903466 | 0.008592 | 0.042324 | Mrps2         |
| 951.3323 | 869.9758 | 640.208 | 667.041 | 0.478598909 | 0.008622 | 0.042449 | Rpa3          |
| 1025.071 | 1035.77  | 762.69  | 748.744 | 0.447135698 | 0.008627 | 0.042456 | Eef1e1        |
| 9.347152 | 35.65475 | 2.606   | 0       | 3.996380464 | 0.008631 | 0.042467 | Cdhr1         |
| 43.62004 | 12.47916 | 1.73733 | 4.87781 | 3.126185144 | 0.00864  | 0.042494 | Capn11        |
| 555.6362 | 553.5399 | 363.103 | 397.542 | 0.545594894 | 0.008651 | 0.04252  | Enox2         |
| 1467.503 | 1244.351 | 948.585 | 1001.17 | 0.476010985 | 0.008672 | 0.042589 | Ccp110        |
| 1056.228 | 910.9788 | 689.722 | 708.502 | 0.492357107 | 0.008678 | 0.042605 | Nubp1         |
| 89.31723 | 81.11455 | 38.2214 | 32.9252 | 1.255306328 | 0.008701 | 0.042705 | Masp2         |
| 829.8194 | 593.6515 | 494.272 | 380.469 | 0.699584813 | 0.008726 | 0.042814 | Mrpl54        |
| 661.5706 | 538.3867 | 403.062 | 397.542 | 0.582861055 | 0.008739 | 0.042866 | Cox10         |
| 2596.431 | 2356.779 | 1805.96 | 1926.74 | 0.408339774 | 0.008803 | 0.043112 | Ptges3        |
| 576.4077 | 419.8346 | 295.347 | 324.375 | 0.684973464 | 0.008819 | 0.04316  | Poc1a         |
| 2830.11  | 2662.518 | 2163.85 | 2019.41 | 0.392372275 | 0.00882  | 0.04316  | Immt          |
| 594.0634 | 454.598  | 334.437 | 339.008 | 0.638125395 | 0.008824 | 0.043166 | Enoph1        |
| 30.1186  | 18.71874 | 3.47467 | 3.65836 | 2.775682437 | 0.008909 | 0.043516 | Efcab5        |
| 3820.908 | 3692.94  | 2304.57 | 3036.44 | 0.493167272 | 0.008926 | 0.043584 | Celsr1        |
| 8382.318 | 7658.64  | 6376.89 | 6047.27 | 0.368436417 | 0.00893  | 0.043584 | Cnot1         |
| 620.0277 | 480.4477 | 359.628 | 354.861 | 0.622051843 | 0.008931 | 0.043584 | Pak4          |
| 253.4117 | 197.8838 | 119.876 | 134.14  | 0.830128868 | 0.008935 | 0.043589 | Slc5a6        |
| 3314.085 | 2905.862 | 2435.74 | 2185.26 | 0.428062648 | 0.008943 | 0.043616 | Prep          |
| 7398.79  | 6734.29  | 5721.91 | 4704.65 | 0.438411049 | 0.009027 | 0.043997 | Ubtf          |
| 598.2177 | 502.7319 | 396.112 | 286.572 | 0.685433072 | 0.00903  | 0.043999 | Setdb2        |
| 617.9506 | 519.6679 | 363.103 | 397.542 | 0.581267406 | 0.009068 | 0.044146 | Fanci         |
| 7392.558 | 6838.58  | 5684.56 | 5353.4  | 0.366371218 | 0.009087 | 0.044224 | Dhx9          |
| 5932.326 | 5004.144 | 3904.66 | 4246.14 | 0.424207809 | 0.009133 | 0.044408 | Ncaph2        |
| 1583.823 | 1314.769 | 1026.76 | 1056.05 | 0.476602037 | 0.009133 | 0.044408 | Nup160        |
| 3926.842 | 3280.237 | 2687.66 | 2666.94 | 0.428402506 | 0.009143 | 0.044442 | Bub3          |
| 54.00577 | 35.65475 | 13.8987 | 9.75563 | 1.907486265 | 0.009157 | 0.044495 | 1700113A16Rik |
| 1375.07  | 1151.648 | 794.831 | 958.49  | 0.52814545  | 0.009179 | 0.044591 | Pspc1         |
| 3852.065 | 3548.539 | 2974.32 | 2508.42 | 0.432068195 | 0.00921  | 0.044712 | Top1          |
| 420.6218 | 352.0906 | 251.914 | 241.452 | 0.645711173 | 0.009241 | 0.044822 | Ska1          |
| 1788.422 | 1723.907 | 1382.05 | 1229.21 | 0.426726232 | 0.009247 | 0.044825 | Nob1          |
| 276.2603 | 254.0401 | 171.127 | 147.554 | 0.731264523 | 0.009277 | 0.044956 | Usp49         |
| 324.0346 | 355.6561 | 194.582 | 231.696 | 0.676637455 | 0.009279 | 0.044956 | Slc2a4rg-ps   |
| 797.6236 | 669.4179 | 500.352 | 512.17  | 0.534601982 | 0.009297 | 0.045012 | Mlh1          |
| 111.1272 | 22.28422 | 17.3733 | 2.43891 | 2.716471867 | 0.009301 | 0.045021 | Car1          |
| 2537.232 | 2036.777 | 1532.33 | 1726.75 | 0.489237332 | 0.009312 | 0.04504  | Ctc1          |
| 186.943  | 179.1651 | 107.715 | 96.3368 | 0.840459945 | 0.009313 | 0.04504  | Fzd5          |
| 4390.046 | 3577.062 | 2842.28 | 3008.39 | 0.44543356  | 0.009319 | 0.045054 | Cbfb          |
| 38.42718 | 30.30653 | 9.55534 | 2.43891 | 2.470468926 | 0.009342 | 0.045151 | Gm6091        |
| 824.6265 | 689.028  | 477.767 | 551.193 | 0.557831964 | 0.009358 | 0.045199 | Dcaf4         |
| 1904.742 | 1668.642 | 1342.96 | 1304.82 | 0.432006723 | 0.00939  | 0.045317 | Cnot10        |
| 294.9546 | 240.6695 | 151.148 | 167.065 | 0.752097255 | 0.009429 | 0.045422 | Ttbk2         |
| 2351.328 | 2088.477 | 1738.2  | 1532.85 | 0.439834431 | 0.00945  | 0.045468 | Cnot9         |

|          |          |         |         |             |          |          |           |
|----------|----------|---------|---------|-------------|----------|----------|-----------|
| 1145.545 | 1024.183 | 773.114 | 802.4   | 0.461712972 | 0.009482 | 0.04558  | Abracl    |
| 1682.487 | 1496.608 | 1118.84 | 1220.67 | 0.442788454 | 0.009631 | 0.046203 | Etfa      |
| 5045.385 | 4783.084 | 3951.57 | 3657.14 | 0.368993345 | 0.009664 | 0.046319 | Rad23b    |
| 16620.27 | 21096.02 | 14832.5 | 9183.7  | 0.651038867 | 0.009689 | 0.046427 | Rnf19b    |
| 2219.429 | 2067.975 | 1707.8  | 1412.13 | 0.457460487 | 0.009699 | 0.046458 | Sms       |
| 3564.381 | 4842.806 | 3204.51 | 1851.13 | 0.733135466 | 0.009712 | 0.046494 | Il21      |
| 2522.692 | 2164.243 | 1836.36 | 1526.76 | 0.477794818 | 0.009742 | 0.046611 | Snrpd3    |
| 1685.603 | 1358.446 | 1076.28 | 1096.29 | 0.486270037 | 0.009762 | 0.046665 | Gfm1      |
| 63.35292 | 90.9196  | 33.878  | 10.9751 | 1.759944388 | 0.009797 | 0.046775 | Pik3r3    |
| 2532.04  | 2307.753 | 1920.62 | 1663.33 | 0.432492918 | 0.009811 | 0.04683  | Ascc2     |
| 10.38572 | 9.805055 | 0       | 0       | 5.73651845  | 0.00986  | 1        | Togaram2  |
| 580.562  | 566.0191 | 424.778 | 328.033 | 0.603680179 | 0.009881 | 0.047121 | Myo19     |
| 886.9408 | 833.4297 | 534.231 | 658.505 | 0.530398845 | 0.009932 | 0.047278 | Gm5424    |
| 55.04434 | 34.76338 | 11.2927 | 13.414  | 1.865746072 | 0.009948 | 0.047343 | Scn4b     |
| 4094.052 | 3388.092 | 2733.7  | 2820.6  | 0.429753546 | 0.009968 | 0.047408 | Spn       |
| 2372.099 | 1563.461 | 1385.52 | 1142.63 | 0.637456236 | 0.009987 | 0.047472 | Ripk3     |
| 39.46575 | 43.67706 | 13.8987 | 4.87781 | 2.113008912 | 0.009991 | 0.047477 | Tfcp2l1   |
| 5317.491 | 4922.138 | 4113.14 | 3766.89 | 0.377539739 | 0.010004 | 0.047512 | Pabpc4    |
| 994.9524 | 1042.01  | 778.326 | 697.527 | 0.463841793 | 0.010027 | 0.047565 | Fbxo45    |
| 64.39149 | 38.32885 | 18.242  | 8.53617 | 1.914708146 | 0.010065 | 0.047687 | Cdr2l     |
| 617.9506 | 478.665  | 318.801 | 382.908 | 0.645421332 | 0.010103 | 0.04784  | Tnfaip8l1 |
| 2519.577 | 1961.902 | 1692.16 | 1435.3  | 0.518001561 | 0.010131 | 0.047945 | Glrx5     |
| 267.9517 | 215.7112 | 132.906 | 148.773 | 0.781035327 | 0.010146 | 0.048002 | Rap1gap   |
| 1052.074 | 935.9371 | 747.923 | 671.919 | 0.484121758 | 0.010151 | 0.048011 | Gtf3c4    |
| 640.7992 | 582.0637 | 451.707 | 365.836 | 0.57792807  | 0.010154 | 0.048011 | Lclat1    |
| 2193.465 | 1893.267 | 1442.86 | 1573.09 | 0.43857325  | 0.010179 | 0.048088 | Sephs1    |
| 8552.644 | 7477.692 | 6325.64 | 5939.96 | 0.385985916 | 0.010187 | 0.048109 | Hnrnpf    |
| 955.4866 | 850.3657 | 677.561 | 598.752 | 0.498987275 | 0.010213 | 0.048189 | Zbtb40    |
| 2589.161 | 2461.96  | 2026.6  | 1748.7  | 0.419165181 | 0.010242 | 0.048301 | Wdr43     |
| 934.7152 | 957.3299 | 689.722 | 698.747 | 0.446705647 | 0.010247 | 0.048309 | Gtf2e1    |
| 233.6788 | 175.5996 | 112.927 | 113.409 | 0.853253054 | 0.010274 | 0.048399 | Klf11     |
| 4283.073 | 3601.129 | 2973.45 | 2938.88 | 0.415011857 | 0.010327 | 0.048616 | Baz1a     |
| 2451.031 | 2142.85  | 1673.92 | 1765.77 | 0.417495515 | 0.010346 | 0.048674 | Wrnip1    |
| 16.61716 | 12.47916 | 0.86867 | 0       | 4.853357621 | 0.010361 | 0.048704 | Sohlh1    |
| 635.6063 | 939.5026 | 259.732 | 551.193 | 0.961493016 | 0.010402 | 0.048853 | Eomes     |
| 417.5061 | 406.4641 | 289.266 | 253.646 | 0.599485785 | 0.010463 | 0.049081 | Nkrf      |
| 1348.067 | 1351.315 | 1063.25 | 896.298 | 0.460720258 | 0.010513 | 0.049276 | Stk35     |
| 1460.233 | 1357.554 | 1108.42 | 903.615 | 0.484276377 | 0.010516 | 0.049276 | Sufu      |
| 1925.513 | 1817.501 | 1406.37 | 1443.83 | 0.393192426 | 0.010544 | 0.049363 | Ankrd10   |
| 367.6546 | 254.0401 | 200.662 | 106.092 | 1.011718232 | 0.010583 | 0.04953  | Mctp1     |
| 864.0923 | 730.0309 | 536.837 | 576.801 | 0.517718395 | 0.010605 | 0.049606 | Chd11     |
| 1114.388 | 1007.247 | 820.891 | 632.896 | 0.543079866 | 0.010617 | 0.049647 | AI662270  |
| 145.4001 | 113.2038 | 72.0994 | 40.242  | 1.190327325 | 0.010631 | 0.049681 | Acer2     |
| 1147.623 | 1007.247 | 765.296 | 797.522 | 0.463454558 | 0.010634 | 0.049681 | Nmd3      |
| 3858.297 | 3497.731 | 2803.19 | 2866.93 | 0.375505377 | 0.010646 | 0.049723 | Ddx46     |

|          |          |         |         |             |          |          |               |
|----------|----------|---------|---------|-------------|----------|----------|---------------|
| 6.231435 | 14.2619  | 0       | 0       | 5.760899256 | 0.010681 | 1        | Ppp1r1b       |
| 1506.969 | 1479.672 | 1185.73 | 886.543 | 0.52556737  | 0.010773 | 0.050273 | Zbtb18        |
| 1901.626 | 1910.203 | 1523.64 | 1308.47 | 0.427617064 | 0.010776 | 0.050275 | Dnajc11       |
| 105.9344 | 158.6636 | 59.9381 | 65.8505 | 1.076865702 | 0.010782 | 0.050285 | Gm26740       |
| 1502.814 | 1275.549 | 1040.66 | 975.563 | 0.461667666 | 0.010803 | 0.050372 | Zfp142        |
| 214.9845 | 203.2321 | 132.906 | 103.654 | 0.81662878  | 0.010817 | 0.050408 | Pard6b        |
| 2096.878 | 1776.498 | 1500.19 | 1302.38 | 0.465771332 | 0.010829 | 0.050446 | Uqcr10        |
| 229.5245 | 179.1651 | 125.088 | 96.3368 | 0.878057822 | 0.010904 | 0.050736 | Mrm3          |
| 1736.493 | 1487.694 | 1192.68 | 1184.09 | 0.439521698 | 0.010912 | 0.05076  | Ppip5k2       |
| 1066.614 | 790.644  | 481.242 | 682.894 | 0.675611105 | 0.010929 | 0.050811 | Prr11         |
| 523.4405 | 390.4195 | 309.246 | 257.305 | 0.686495557 | 0.010962 | 0.05095  | 3110082I17Rik |
| 698.9592 | 576.7155 | 467.343 | 280.474 | 0.766324444 | 0.010975 | 0.050995 | Ccne2         |
| 2015.869 | 1526.023 | 1195.29 | 1282.86 | 0.515195289 | 0.010997 | 0.051066 | Mtf2          |
| 238.8717 | 261.171  | 165.915 | 121.945 | 0.791576576 | 0.011063 | 0.051325 | Glce          |
| 146.4387 | 106.9642 | 69.4934 | 41.4614 | 1.179685344 | 0.011065 | 0.051325 | Eldr          |
| 1009.492 | 961.7868 | 754.003 | 678.016 | 0.459741087 | 0.011097 | 0.051427 | Sptssa        |
| 6536.775 | 5765.373 | 4947.93 | 4331.5  | 0.406420725 | 0.011128 | 0.051545 | Trim8         |
| 3677.585 | 3157.228 | 2651.17 | 2495    | 0.408972631 | 0.011145 | 0.051608 | Adam10        |
| 2653.553 | 2239.118 | 1845.92 | 1795.04 | 0.425889434 | 0.011156 | 0.051644 | Wiz           |
| 68.54578 | 113.2038 | 27.7974 | 42.6809 | 1.378974471 | 0.011165 | 0.051669 | Kcnh2         |
| 491.2448 | 418.0519 | 310.983 | 291.449 | 0.592201145 | 0.011181 | 0.051715 | Taf4b         |
| 2981.741 | 2674.997 | 2223.79 | 2074.29 | 0.395755473 | 0.011201 | 0.051792 | Nab2          |
| 182.7887 | 155.0981 | 101.634 | 75.6061 | 0.923748657 | 0.011218 | 0.051841 | Slc25a26      |
| 2339.904 | 2665.192 | 1230.9  | 513.39  | 1.520080835 | 0.011226 | 0.051865 | Lta           |
| 6181.583 | 5902.643 | 4894.07 | 4576.61 | 0.351347696 | 0.01129  | 0.052112 | Kars          |
| 1194.358 | 1087.47  | 887.778 | 725.575 | 0.49821647  | 0.011299 | 0.052126 | Prpf3         |
| 8144.485 | 7171.952 | 6031.16 | 5798.5  | 0.372506388 | 0.011299 | 0.052126 | Ewsr1         |
| 719.7307 | 706.8554 | 483.848 | 532.901 | 0.48983931  | 0.011309 | 0.052158 | Rad1          |
| 1209.937 | 992.0933 | 820.022 | 725.575 | 0.509155942 | 0.011332 | 0.052247 | Wdr55         |
| 5595.828 | 5395.455 | 4515.33 | 3736.4  | 0.413111154 | 0.011364 | 0.052353 | Etf1          |
| 1790.499 | 2252.489 | 1379.44 | 1519.44 | 0.480755868 | 0.011394 | 0.052445 | Timm23        |
| 1315.871 | 1255.047 | 1004.18 | 890.201 | 0.43932582  | 0.011399 | 0.052451 | Pop1          |
| 2030.409 | 1676.664 | 1405.5  | 1286.52 | 0.460724624 | 0.011412 | 0.052494 | Idh3a         |
| 7.270007 | 12.47916 | 0       | 0       | 5.706719181 | 0.011434 | 1        | Rai2          |
| 790.3536 | 773.708  | 548.129 | 582.899 | 0.468392964 | 0.011458 | 0.052664 | Slc39a11      |
| 442.4319 | 407.3555 | 297.953 | 267.06  | 0.586572028 | 0.011543 | 0.053009 | Slfn3         |
| 503.7076 | 471.534  | 357.891 | 270.719 | 0.62970886  | 0.011568 | 0.053094 | Armc6         |
| 5228.174 | 4657.401 | 4014.98 | 3065.71 | 0.480816408 | 0.011609 | 0.053267 | Lpxn          |
| 394.6575 | 288.8034 | 217.167 | 195.113 | 0.726390256 | 0.011627 | 0.053319 | Mrps28        |
| 38.42718 | 32.08927 | 10.424  | 6.09727 | 2.071615038 | 0.011639 | 0.053357 | Ankrd34a      |
| 416.4675 | 384.1799 | 275.368 | 256.085 | 0.589527772 | 0.011647 | 0.05338  | Hcn2          |
| 434.1233 | 373.4835 | 262.338 | 269.499 | 0.602383071 | 0.011739 | 0.05377  | Tamm41        |
| 2836.341 | 2486.919 | 2078.72 | 1936.49 | 0.406267297 | 0.011755 | 0.053828 | Mcmbp         |
| 330.266  | 495.601  | 272.762 | 118.287 | 1.073438837 | 0.011809 | 0.054025 | Ppih          |
| 234.7174 | 182.7306 | 113.795 | 123.165 | 0.817247921 | 0.011811 | 0.054025 | A430078G23Rik |

|          |          |         |         |             |          |          |          |
|----------|----------|---------|---------|-------------|----------|----------|----------|
| 2459.339 | 2315.776 | 1689.56 | 1918.2  | 0.405034407 | 0.011845 | 0.054088 | Ii27ra   |
| 1475.811 | 1335.27  | 1098.86 | 956.051 | 0.450703528 | 0.011945 | 0.054493 | Klhdc4   |
| 59.19863 | 1.782737 | 2.606   | 0       | 4.451456055 | 0.011947 | 0.054493 | Igkv3-12 |
| 3582.036 | 3279.345 | 2786.69 | 2195.02 | 0.461033083 | 0.011963 | 0.054504 | Psmc5    |
| 106.973  | 130.1398 | 66.0187 | 40.242  | 1.148115464 | 0.011983 | 0.05458  | Khdrbs3  |
| 1282.637 | 1263.069 | 996.362 | 893.859 | 0.428439973 | 0.012018 | 0.054706 | Pted3    |
| 797.6236 | 627.5235 | 526.413 | 353.641 | 0.691909752 | 0.012042 | 0.0548   | Ammecr1  |
| 2989.011 | 2631.32  | 2129.1  | 2154.77 | 0.391590995 | 0.012083 | 0.054931 | Git1     |
| 78.9315  | 58.83033 | 29.5347 | 21.9502 | 1.409625629 | 0.012084 | 0.054931 | Vangl2   |
| 35.31146 | 14.2619  | 4.34334 | 2.43891 | 2.838734764 | 0.012094 | 0.054945 | Olfrl57  |
| 1972.249 | 1731.929 | 1468.92 | 1171.89 | 0.486783845 | 0.012123 | 0.055043 | Ppan     |
| 1360.53  | 1230.089 | 1017.21 | 830.448 | 0.485853272 | 0.012199 | 0.055338 | Phf6     |
| 9904.865 | 8525.05  | 7170.85 | 7028.93 | 0.376068266 | 0.012294 | 0.055663 | Anp32b   |
| 368.6932 | 377.9403 | 46.908  | 2.43891 | 3.911664593 | 0.012301 | 0.055682 | Dpysl3   |
| 15468.5  | 12855.32 | 11401.3 | 9275.16 | 0.453825824 | 0.012309 | 0.055703 | H3f3b    |
| 844.3594 | 618.6099 | 519.463 | 428.028 | 0.624266904 | 0.012495 | 0.056463 | Cpped1   |
| 10720.14 | 9279.148 | 7450.56 | 7943.52 | 0.377598996 | 0.012618 | 0.056906 | Sfl      |
| 62.31435 | 59.7217  | 26.9287 | 12.1945 | 1.619478876 | 0.012659 | 0.057047 | Abat     |
| 2641.09  | 2391.542 | 2017.91 | 1746.26 | 0.418112065 | 0.012686 | 0.057134 | Eed      |
| 1181.895 | 874.4327 | 751.397 | 614.604 | 0.58815942  | 0.012737 | 0.057301 | Ap1s3    |
| 729.0778 | 755.8806 | 519.463 | 553.632 | 0.469661893 | 0.012749 | 0.057338 | Rbbp8    |
| 1932.783 | 1668.642 | 1406.37 | 1237.75 | 0.444707725 | 0.012784 | 0.057455 | Eif1ad   |
| 110.0887 | 79.33181 | 47.7767 | 30.4863 | 1.262903736 | 0.01282  | 0.057595 | Gm14150  |
| 1451.924 | 1251.482 | 944.242 | 1034.1  | 0.450844772 | 0.012843 | 0.057666 | Blmh     |
| 1438.423 | 1315.66  | 1072.8  | 971.904 | 0.428586936 | 0.012871 | 0.057757 | Pfdn6    |
| 651.1849 | 468.8599 | 314.458 | 390.225 | 0.669788652 | 0.012919 | 0.057957 | Gpsm2    |
| 3186.34  | 2780.179 | 2383.62 | 2053.56 | 0.426478045 | 0.013012 | 0.05831  | Psmc2    |
| 3312.007 | 3313.217 | 2707.64 | 2368.18 | 0.383752728 | 0.013032 | 0.05837  | Tob2     |
| 1074.922 | 857.4967 | 725.337 | 586.557 | 0.55657058  | 0.013033 | 0.05837  | Zbtb45   |
| 1045.842 | 972.4832 | 785.275 | 662.163 | 0.477794155 | 0.013068 | 0.058496 | Otud6b   |
| 4944.643 | 4016.507 | 3474.67 | 3169.36 | 0.431216012 | 0.013171 | 0.05886  | Coro1c   |
| 1436.346 | 1184.629 | 991.15  | 888.981 | 0.478020664 | 0.0132   | 0.058955 | Tyw1     |
| 2153.999 | 1958.337 | 1613.12 | 1515.78 | 0.393688626 | 0.013207 | 0.058971 | Chordc1  |
| 1068.691 | 918.1097 | 738.367 | 696.308 | 0.468652264 | 0.013243 | 0.059051 | Foxn2    |
| 3179.07  | 2523.465 | 2194.25 | 1930.39 | 0.466621825 | 0.013262 | 0.059091 | Psemb5   |
| 1174.625 | 1003.681 | 810.467 | 770.694 | 0.46128114  | 0.013296 | 0.059204 | Mrpl13   |
| 742.5793 | 625.7408 | 514.251 | 379.25  | 0.611541017 | 0.013321 | 0.059267 | Nudt1    |
| 77.89293 | 92.70234 | 17.3733 | 43.9003 | 1.497333633 | 0.013356 | 0.059392 | Rtn4rl1  |
| 92.43295 | 45.4598  | 27.7974 | 7.31672 | 1.945929267 | 0.013412 | 0.05959  | Insm1    |
| 3589.306 | 2783.744 | 2467.88 | 2046.24 | 0.49678147  | 0.013421 | 0.059597 | Ncln     |
| 2146.729 | 1876.331 | 1607.03 | 1264.57 | 0.485114678 | 0.01345  | 0.059693 | Rnpep    |
| 2820.763 | 2650.93  | 2184.7  | 2052.34 | 0.368470676 | 0.013486 | 0.059838 | Pbrm1    |
| 2948.507 | 2793.549 | 2347.14 | 1868.2  | 0.44498374  | 0.013508 | 0.059915 | Pes1     |
| 2095.839 | 1559.004 | 1231.77 | 1332.86 | 0.511014502 | 0.013538 | 0.059997 | Reep4    |
| 9826.972 | 8443.935 | 7440.14 | 6092.39 | 0.43280542  | 0.013541 | 0.059997 | Akt1     |

|          |          |         |         |             |          |          |               |
|----------|----------|---------|---------|-------------|----------|----------|---------------|
| 15.57859 | 4.456843 | 0       | 0       | 5.721960899 | 0.013562 | 1        | Gm13630       |
| 791.3922 | 447.4671 | 185.026 | 45.1198 | 2.425434643 | 0.01363  | 0.060343 | Npas4         |
| 4969.569 | 5084.367 | 4136.59 | 3683.97 | 0.362079151 | 0.013668 | 0.060473 | Mapk6         |
| 1835.157 | 1741.734 | 1421.14 | 1296.28 | 0.39565795  | 0.013671 | 0.060473 | Arhgap17      |
| 257.566  | 10.69642 | 3.47467 | 0       | 6.228811345 | 0.013758 | 0.060809 | Ighv9-3       |
| 1659.639 | 1474.324 | 1197.89 | 1157.26 | 0.411591255 | 0.013769 | 0.060839 | Hspbp1        |
| 1059.344 | 934.1544 | 761.821 | 675.577 | 0.470266916 | 0.01379  | 0.060899 | Tmem97        |
| 1463.349 | 1283.571 | 1074.54 | 920.687 | 0.45980228  | 0.013855 | 0.061135 | Uchl5         |
| 1374.031 | 1231.871 | 1018.95 | 892.64  | 0.445635619 | 0.014046 | 0.061894 | Bccip         |
| 248.2188 | 291.4776 | 184.158 | 125.604 | 0.795736864 | 0.014065 | 0.061962 | Gm12411       |
| 29.08003 | 28.5238  | 7.81801 | 3.65836 | 2.296054649 | 0.014116 | 0.062152 | Chga          |
| 129.8216 | 76.65771 | 44.302  | 45.1198 | 1.205281512 | 0.014124 | 0.062171 | Myl4          |
| 481.8976 | 280.7811 | 204.137 | 226.818 | 0.823267853 | 0.014134 | 0.062196 | A530040E14Rik |
| 502.6691 | 443.9016 | 262.338 | 349.983 | 0.631625021 | 0.014145 | 0.062213 | Slc25a42      |
| 1467.503 | 1186.412 | 967.696 | 949.954 | 0.468154732 | 0.014158 | 0.062252 | Acaa2         |
| 1625.366 | 1512.653 | 1219.61 | 1167.02 | 0.394311105 | 0.014176 | 0.062298 | Nudt5         |
| 36.35003 | 31.1979  | 9.55534 | 7.31672 | 1.989568913 | 0.014187 | 0.062327 | Rasl10a       |
| 1122.697 | 1042.901 | 855.637 | 648.749 | 0.523337706 | 0.014213 | 0.062426 | Knop1         |
| 279.376  | 430.5311 | 235.409 | 151.212 | 0.873223347 | 0.014245 | 0.06255  | Nbl1          |
| 1049.997 | 763.0116 | 674.955 | 409.736 | 0.738091136 | 0.014343 | 0.062961 | Tmem154       |
| 10.38572 | 8.022318 | 0       | 0       | 5.602424774 | 0.014374 | 1        | Trabd2b       |
| 1187.088 | 1120.45  | 912.97  | 758.5   | 0.46348496  | 0.01454  | 0.063757 | Grhpr         |
| 740.5021 | 661.3956 | 533.362 | 431.686 | 0.535987664 | 0.01455  | 0.063785 | Sms-ps        |
| 1395.841 | 1271.092 | 1033.71 | 963.368 | 0.416385963 | 0.014578 | 0.063888 | Tubgcp3       |
| 884.8637 | 1039.336 | 714.045 | 676.797 | 0.46826528  | 0.014583 | 0.063892 | Cep162        |
| 4230.105 | 3812.384 | 3164.56 | 3107.17 | 0.35857619  | 0.014593 | 0.06392  | Shmt2         |
| 1275.367 | 1041.119 | 845.213 | 825.57  | 0.470689879 | 0.014605 | 0.063955 | Wbscr22       |
| 1552.666 | 1492.151 | 1213.53 | 1075.56 | 0.410510288 | 0.014627 | 0.064016 | Dhx37         |
| 500.5919 | 482.2304 | 294.478 | 367.055 | 0.574057143 | 0.014669 | 0.064178 | Ypel2         |
| 3278.773 | 2743.633 | 2412.29 | 1449.93 | 0.639829807 | 0.014672 | 0.064178 | H2afj         |
| 257.566  | 221.0594 | 152.885 | 137.798 | 0.716505507 | 0.014766 | 0.064539 | Dscc1         |
| 4483.517 | 3698.289 | 2888.32 | 3219.36 | 0.421932778 | 0.014776 | 0.064563 | Nup153        |
| 58.16006 | 137.2708 | 44.302  | 19.5113 | 1.603115137 | 0.014849 | 0.064835 | Tgfb2         |
| 2910.08  | 2387.085 | 2017.91 | 1930.39 | 0.42351668  | 0.01485  | 0.064835 | Snrpg         |
| 1032.341 | 972.4832 | 721.863 | 768.256 | 0.428533513 | 0.014906 | 0.065025 | Parl          |
| 3040.94  | 2615.276 | 2288.94 | 1646.26 | 0.522327055 | 0.014933 | 0.06509  | Nhp2          |
| 2189.311 | 1905.746 | 1620.93 | 1430.42 | 0.423480497 | 0.014986 | 0.065253 | Brd3          |
| 1732.339 | 1645.467 | 1340.35 | 1236.53 | 0.389694063 | 0.015039 | 0.065414 | Utp6          |
| 1002.222 | 960.8954 | 767.033 | 667.041 | 0.451425957 | 0.015077 | 0.06556  | Tnfrsf10b     |
| 369.7318 | 291.4776 | 197.188 | 219.502 | 0.666802106 | 0.01511  | 0.065684 | Sass6         |
| 8.308579 | 9.805055 | 0       | 0       | 5.580718056 | 0.015151 | 1        | Nrep          |
| 28603.32 | 26761.56 | 23150   | 19491.7 | 0.376606067 | 0.015214 | 0.06612  | Atp5b         |
| 428.9304 | 369.918  | 262.338 | 271.938 | 0.580205554 | 0.015296 | 0.066458 | CT030173.1    |
| 13.50144 | 16.936   | 1.73733 | 0       | 3.993813279 | 0.015319 | 0.066539 | Ric3          |
| 1454.001 | 1232.763 | 1032.85 | 931.662 | 0.450514182 | 0.015336 | 0.06658  | Nom1          |



|          |          |         |         |             |          |          |               |
|----------|----------|---------|---------|-------------|----------|----------|---------------|
| 2237.085 | 2052.822 | 1580.97 | 1708.45 | 0.38342306  | 0.015384 | 0.066713 | Eml4          |
| 270.0288 | 363.6784 | 213.692 | 162.187 | 0.750770416 | 0.015397 | 0.066753 | Ccdc74a       |
| 1435.307 | 1371.816 | 1076.28 | 1069.46 | 0.387416248 | 0.015421 | 0.066803 | Xpo4          |
| 838.1279 | 738.0533 | 608.067 | 469.49  | 0.545880843 | 0.015437 | 0.066854 | Ltv1          |
| 572.2534 | 535.7126 | 408.274 | 368.275 | 0.510929901 | 0.015445 | 0.066854 | Gm10131       |
| 1511.123 | 1226.523 | 937.292 | 1038.97 | 0.4704289   | 0.015511 | 0.067061 | Rhno1         |
| 860.9765 | 443.0102 | 103.371 | 8.53617 | 3.538795972 | 0.015514 | 0.067061 | S100a3        |
| 21.81002 | 18.71874 | 3.47467 | 2.43891 | 2.757064901 | 0.015526 | 0.06708  | Mtcl1         |
| 603.4106 | 461.729  | 348.336 | 360.958 | 0.586067585 | 0.015533 | 0.067092 | Klf9          |
| 2440.645 | 2130.371 | 1794.67 | 1674.31 | 0.397373712 | 0.015684 | 0.067582 | Med24         |
| 2657.707 | 2853.271 | 2176.88 | 2131.6  | 0.355141973 | 0.015695 | 0.067592 | Larp4         |
| 2701.327 | 2469.983 | 1996.2  | 2023.07 | 0.36350256  | 0.01573  | 0.067724 | Hdgfl2        |
| 3062.75  | 2526.139 | 2110.86 | 2088.92 | 0.411938471 | 0.015746 | 0.067773 | Naa40         |
| 344.806  | 303.9567 | 229.328 | 171.943 | 0.688096654 | 0.015757 | 0.067802 | Pinx1         |
| 1079.077 | 851.2571 | 666.268 | 697.527 | 0.500993157 | 0.015803 | 0.067982 | Bora          |
| 4290.343 | 4039.683 | 3383.46 | 3169.36 | 0.345872866 | 0.015864 | 0.068192 | Syncrip       |
| 5009.035 | 4513.891 | 3637.98 | 3814.45 | 0.353736335 | 0.015892 | 0.068239 | Hnrnpdl       |
| 835.0122 | 703.2899 | 568.109 | 521.926 | 0.495418715 | 0.015897 | 0.068241 | Tsen54        |
| 424.7761 | 338.7201 | 247.57  | 249.988 | 0.616884033 | 0.015919 | 0.068292 | Skp2          |
| 2706.52  | 2233.77  | 1983.17 | 1408.47 | 0.541405942 | 0.015928 | 0.068302 | Sptlc1        |
| 125.6673 | 1.782737 | 0.86867 | 0       | 7.006956975 | 0.015958 | 0.068393 | Igkv6-25      |
| 1878.778 | 1839.785 | 1467.18 | 1419.44 | 0.365046954 | 0.015976 | 0.068448 | Zcchc8        |
| 192.1359 | 159.555  | 112.058 | 62.1921 | 1.002932054 | 0.015983 | 0.068448 | Gm17383       |
| 1196.435 | 1133.821 | 891.253 | 870.69  | 0.402891277 | 0.01604  | 0.068654 | Trmt6         |
| 265.8745 | 237.1041 | 172.865 | 113.409 | 0.806074604 | 0.016048 | 0.068669 | C130083M11Rik |
| 3095.984 | 2891.6   | 2467.02 | 1880.4  | 0.46086089  | 0.01609  | 0.068832 | Szrd1         |
| 2774.027 | 2746.307 | 2254.19 | 2032.83 | 0.364212582 | 0.016145 | 0.069033 | Supt20        |
| 45.69719 | 27.63243 | 9.55534 | 0       | 2.875147251 | 0.016166 | 0.069034 | Tmem136       |
| 236.7945 | 220.1681 | 109.452 | 156.09  | 0.789084661 | 0.01617  | 0.069034 | Insrr         |
| 79.97008 | 48.13391 | 27.7974 | 8.53617 | 1.791249016 | 0.016221 | 0.069173 | Tpm2          |
| 21700.97 | 16976.12 | 15440.6 | 12718.9 | 0.457720923 | 0.016232 | 0.069199 | Ucp2          |
| 3878.029 | 3077.005 | 2596.45 | 2576.7  | 0.426756061 | 0.016236 | 0.069199 | Agap2         |
| 1014.685 | 908.3047 | 723.6   | 695.088 | 0.437962006 | 0.016248 | 0.069233 | Nhlrc2        |
| 2669.131 | 2853.271 | 2263.75 | 1909.66 | 0.403409001 | 0.016269 | 0.069286 | Acaca         |
| 104.8958 | 69.52676 | 31.272  | 42.6809 | 1.243589188 | 0.016289 | 0.069316 | Mmp17         |
| 438.2776 | 373.4835 | 209.349 | 297.547 | 0.68320493  | 0.016325 | 0.069453 | Ube2t         |
| 943.0238 | 917.2184 | 710.57  | 676.797 | 0.422446442 | 0.01641  | 0.069723 | Usp45         |
| 1320.026 | 1269.309 | 1032.85 | 896.298 | 0.423285346 | 0.016416 | 0.069729 | Lsg1          |
| 3535.301 | 3194.665 | 2726.75 | 2455.98 | 0.376323304 | 0.016481 | 0.069986 | Xrn2          |
| 293.916  | 256.7142 | 191.976 | 126.823 | 0.781791088 | 0.016565 | 0.070326 | Pdss1         |
| 459.049  | 378.8317 | 274.499 | 285.352 | 0.581425661 | 0.01659  | 0.070409 | Pole2         |
| 1201.628 | 1038.444 | 848.688 | 802.4   | 0.439170201 | 0.016633 | 0.070575 | Ppie          |
| 1393.764 | 652.4819 | 323.144 | 90.2395 | 2.305796956 | 0.016683 | 0.070732 | Twist1        |
| 2973.433 | 2983.411 | 2421.84 | 2260.87 | 0.346844029 | 0.016701 | 0.070751 | Trim24        |
| 2281.744 | 2411.152 | 1928.44 | 1510.9  | 0.447363028 | 0.016718 | 0.070807 | Wdr6          |

|          |          |         |         |             |          |          |               |
|----------|----------|---------|---------|-------------|----------|----------|---------------|
| 1444.654 | 1388.752 | 1104.95 | 1067.02 | 0.383087775 | 0.016744 | 0.07088  | Zbtb17        |
| 37.38861 | 8.022318 | 3.47467 | 1.21945 | 3.223491626 | 0.016792 | 0.07104  | Cttnbp2       |
| 4996.572 | 4921.246 | 4133.99 | 3502.27 | 0.376684942 | 0.016795 | 0.07104  | Cct6a         |
| 909.7894 | 686.3539 | 502.958 | 581.679 | 0.557932541 | 0.016842 | 0.071201 | Mphosph9      |
| 364.5389 | 334.2632 | 253.651 | 167.065 | 0.726320614 | 0.016865 | 0.071262 | Ptk2          |
| 5309.182 | 4579.852 | 4004.56 | 3518.12 | 0.394130242 | 0.016951 | 0.07153  | Psme3         |
| 229.5245 | 199.6666 | 104.24  | 143.895 | 0.795742481 | 0.016984 | 0.071648 | Cep72         |
| 37.38861 | 40.11159 | 9.55534 | 13.414  | 1.767521299 | 0.016993 | 0.071669 | Ppp2r2c       |
| 346.8832 | 226.4076 | 184.158 | 137.798 | 0.827220201 | 0.017076 | 0.071988 | Ankrd9        |
| 5589.597 | 5230.551 | 4510.99 | 3559.58 | 0.422444597 | 0.017079 | 0.071988 | Ahcy          |
| 637.6835 | 566.9105 | 378.739 | 456.076 | 0.530894565 | 0.017113 | 0.072082 | Nsun5         |
| 2341.981 | 1997.557 | 1690.43 | 1587.73 | 0.404025716 | 0.017126 | 0.0721   | Pycr2         |
| 160.9787 | 114.0952 | 59.0694 | 79.2645 | 0.996122303 | 0.017126 | 0.0721   | Ppargc1b      |
| 12.46287 | 13.37053 | 0       | 1.21945 | 4.611161533 | 0.017135 | 1        | Pappa2        |
| 1631.597 | 1517.109 | 1261.31 | 1110.92 | 0.407387173 | 0.017148 | 0.072172 | Mrps7         |
| 1591.093 | 1340.618 | 1126.66 | 1042.63 | 0.43356216  | 0.017203 | 0.072348 | Snrpd1        |
| 781.0065 | 682.7884 | 433.465 | 567.046 | 0.55118522  | 0.017214 | 0.072356 | Dsn1          |
| 98.66438 | 83.78865 | 40.8274 | 4.87781 | 1.972294903 | 0.017222 | 0.072371 | Neol          |
| 5019.42  | 4392.665 | 3803.03 | 3446.17 | 0.376281013 | 0.01724  | 0.072415 | Ppmlg         |
| 23852.89 | 23406.45 | 19871.6 | 13333.5 | 0.509054203 | 0.017291 | 0.072579 | Flna          |
| 1600.44  | 1378.947 | 1135.35 | 1099.95 | 0.413937538 | 0.017311 | 0.072615 | Tsc22d2       |
| 3701.472 | 3217.841 | 2837.94 | 2124.29 | 0.4787805   | 0.017355 | 0.072757 | Psmc4         |
| 1993.02  | 1788.086 | 1510.61 | 778.011 | 0.722673478 | 0.017425 | 0.072996 | Stom          |
| 904.5966 | 839.6693 | 688.853 | 463.392 | 0.59520783  | 0.017458 | 0.073095 | Ercc612       |
| 1327.296 | 1192.651 | 987.675 | 891.42  | 0.422156464 | 0.01752  | 0.073296 | Utp15         |
| 93.47152 | 66.85265 | 31.272  | 37.8031 | 1.218009003 | 0.01759  | 0.073442 | Erfe          |
| 2191.388 | 2215.051 | 1733.86 | 1730.4  | 0.347075316 | 0.017616 | 0.073528 | Elk4          |
| 1905.78  | 1736.386 | 1470.65 | 1258.48 | 0.415198454 | 0.017647 | 0.073636 | Cdkn2aipnl    |
| 3699.395 | 3306.978 | 2735.43 | 2741.33 | 0.355194344 | 0.017652 | 0.073639 | Ssb           |
| 2858.151 | 2679.454 | 2270.7  | 1974.29 | 0.382739298 | 0.017663 | 0.073663 | Tufim         |
| 552.5205 | 487.5787 | 384.82  | 329.252 | 0.53989064  | 0.017671 | 0.073663 | Pccb          |
| 501.6305 | 566.9105 | 290.135 | 407.297 | 0.619559748 | 0.017687 | 0.073702 | Zhx2          |
| 1474.773 | 1316.552 | 1054.56 | 1060.92 | 0.399692497 | 0.01769  | 0.073702 | Mrpl3         |
| 1078.038 | 863.7362 | 692.328 | 698.747 | 0.480639473 | 0.01771  | 0.073765 | Nelfa         |
| 890.0566 | 747.8583 | 577.664 | 601.19  | 0.474318701 | 0.017722 | 0.073786 | Nfkbid        |
| 2096.878 | 1899.507 | 1580.97 | 1492.61 | 0.378171793 | 0.017724 | 0.073786 | Ddx19a        |
| 1348.067 | 974.266  | 681.035 | 873.129 | 0.580307748 | 0.017729 | 0.073791 | Clpb          |
| 2455.185 | 2235.553 | 1860.69 | 1779.18 | 0.365472292 | 0.01793  | 0.074447 | Zdhhc3        |
| 760.235  | 793.3181 | 532.493 | 601.19  | 0.456211667 | 0.017933 | 0.074447 | Diexf         |
| 33.23432 | 50.80801 | 15.636  | 6.09727 | 1.925018773 | 0.017941 | 0.074462 | Spon1         |
| 118.3973 | 114.9866 | 59.0694 | 63.4116 | 0.93181591  | 0.017954 | 0.074496 | 2010107G23Rik |
| 3637.081 | 3593.107 | 3002.98 | 2581.58 | 0.371999797 | 0.017978 | 0.074576 | Psma4         |
| 275.2217 | 222.8422 | 150.279 | 157.309 | 0.695081803 | 0.018031 | 0.074756 | Hmgb1-ps2     |
| 45.69719 | 62.39581 | 21.7167 | 3.65836 | 2.057041929 | 0.018044 | 0.07479  | Syt14         |
| 35.31146 | 18.71874 | 6.94934 | 1.21945 | 2.666096973 | 0.018089 | 0.074958 | Gjc1          |

|          |          |         |         |             |          |          |               |
|----------|----------|---------|---------|-------------|----------|----------|---------------|
| 442.4319 | 352.0906 | 284.923 | 214.624 | 0.664999389 | 0.018099 | 0.07496  | 2310033P09Rik |
| 1488.274 | 1408.362 | 1097.13 | 1130.43 | 0.379020651 | 0.018109 | 0.074983 | Gnl3l         |
| 663.6478 | 532.1471 | 390.9   | 431.686 | 0.540130596 | 0.01821  | 0.075306 | Nup37         |
| 76.85436 | 55.26486 | 31.272  | 14.6334 | 1.505026467 | 0.018237 | 0.075396 | Tmem267       |
| 1348.067 | 1103.514 | 896.465 | 899.957 | 0.448113443 | 0.018278 | 0.07553  | Ubac1         |
| 1932.783 | 1838.894 | 1547.1  | 1221.89 | 0.444515351 | 0.018291 | 0.075564 | Jmjd6         |
| 1787.383 | 1488.586 | 1157.93 | 1270.67 | 0.432019498 | 0.018345 | 0.075753 | Ttll12        |
| 489.1676 | 434.0965 | 333.568 | 301.205 | 0.538357196 | 0.018346 | 0.075753 | Toe1          |
| 1389.61  | 1287.136 | 1078.02 | 882.884 | 0.447317411 | 0.018355 | 0.075771 | Vhl           |
| 2730.407 | 3052.938 | 2380.15 | 1568.22 | 0.549722321 | 0.018382 | 0.075796 | Icam1         |
| 998.0681 | 873.5413 | 664.531 | 710.941 | 0.444620907 | 0.018393 | 0.075796 | Mrps5         |
| 278.3374 | 249.5832 | 176.34  | 158.529 | 0.654016778 | 0.018395 | 0.075796 | Fbxl15        |
| 225.3702 | 212.1457 | 148.542 | 106.092 | 0.774488166 | 0.0184   | 0.075796 | Gm10254       |
| 142.2844 | 87.35413 | 56.4634 | 51.217  | 1.088203451 | 0.018404 | 0.075796 | Rfx2          |
| 3308.892 | 2839.009 | 2472.23 | 2179.16 | 0.401752956 | 0.018416 | 0.075825 | Ppp1r10       |
| 1141.391 | 1128.473 | 885.172 | 840.203 | 0.395096923 | 0.018433 | 0.075858 | Zfp319        |
| 241.9874 | 204.1234 | 117.27  | 148.773 | 0.749368521 | 0.018451 | 0.075913 | Tram2         |
| 3182.186 | 2903.188 | 2436.61 | 2326.72 | 0.35300028  | 0.018466 | 0.075937 | Dhx38         |
| 41.5429  | 62.39581 | 21.7167 | 10.9751 | 1.651364904 | 0.018502 | 0.076046 | Gm42608       |
| 100.7415 | 86.46276 | 45.1707 | 45.1198 | 1.050966481 | 0.018517 | 0.076066 | Rpp40         |
| 2475.957 | 2294.383 | 1897.17 | 1830.4  | 0.355480283 | 0.018525 | 0.076083 | Arid2         |
| 798.6622 | 590.9774 | 490.797 | 449.978 | 0.561098555 | 0.018641 | 0.076481 | Tmem39b       |
| 6852.501 | 8432.348 | 5289.32 | 6155.8  | 0.417685381 | 0.018675 | 0.076599 | Tcf7          |
| 285.6074 | 253.1487 | 182.42  | 158.529 | 0.656746763 | 0.01876  | 0.076867 | Rdh12         |
| 483.9747 | 492.9269 | 364.84  | 313.399 | 0.524194397 | 0.018764 | 0.076867 | Gcfc2         |
| 196.2902 | 267.4106 | 154.623 | 81.7034 | 0.965449397 | 0.018784 | 0.076931 | Mreg          |
| 6318.675 | 5802.81  | 4825.45 | 4836.35 | 0.327128473 | 0.018808 | 0.077009 | Sdha          |
| 630.4135 | 585.6292 | 469.949 | 356.08  | 0.554603346 | 0.018976 | 0.077537 | Gm10093       |
| 1814.386 | 1920.899 | 1535.8  | 1114.58 | 0.493678621 | 0.019001 | 0.077621 | Tgfbr3        |
| 878.6323 | 858.388  | 631.521 | 667.041 | 0.420285697 | 0.019018 | 0.07767  | Cnm3          |
| 2918.388 | 2469.091 | 2057    | 2063.31 | 0.386615558 | 0.019111 | 0.078012 | Rnf220        |
| 1725.069 | 1615.16  | 1345.57 | 1202.38 | 0.389621018 | 0.019139 | 0.07807  | Thumpd1       |
| 117.3587 | 95.37645 | 59.0694 | 43.9003 | 1.038497603 | 0.019193 | 0.078188 | Efr3b         |
| 1128.928 | 966.2436 | 822.628 | 673.138 | 0.484171469 | 0.019208 | 0.078229 | Lrrc14        |
| 276.2603 | 246.9091 | 147.673 | 180.479 | 0.6760593   | 0.01922  | 0.078244 | Zfp850        |
| 3875.952 | 3227.646 | 2652.04 | 2771.82 | 0.389178271 | 0.019282 | 0.07845  | Gnl1          |
| 29.08003 | 20.50148 | 5.212   | 4.87781 | 2.29190436  | 0.019328 | 0.078584 | Tal2          |
| 416.4675 | 449.2498 | 293.61  | 308.522 | 0.525049967 | 0.019337 | 0.078584 | Fam35a        |
| 4099.245 | 3877.454 | 3115.04 | 3235.21 | 0.329057741 | 0.019339 | 0.078584 | Erbin         |
| 1268.097 | 1246.133 | 959.009 | 974.343 | 0.379115497 | 0.019381 | 0.078732 | Tmem209       |
| 4073.281 | 3610.934 | 3138.5  | 2775.48 | 0.377219341 | 0.019431 | 0.078867 | Psmc1         |
| 583.6777 | 467.9685 | 390.032 | 299.986 | 0.604325328 | 0.01946  | 0.078915 | Ormdl2        |
| 1156.97  | 964.4609 | 829.577 | 671.919 | 0.496603087 | 0.019467 | 0.078924 | Clpp          |
| 5372.535 | 5501.527 | 4572.67 | 3759.57 | 0.383677    | 0.019538 | 0.079089 | Cabin1        |
| 3871.798 | 3482.577 | 2031.81 | 3055.95 | 0.532309774 | 0.019541 | 0.079089 | Abhd8         |

|          |          |         |         |             |          |          |               |
|----------|----------|---------|---------|-------------|----------|----------|---------------|
| 2704.443 | 2821.182 | 2257.67 | 2079.17 | 0.349126762 | 0.019542 | 0.079089 | Atp9b         |
| 411.2747 | 334.2632 | 251.045 | 242.671 | 0.593079949 | 0.019623 | 0.079356 | Gm12184       |
| 2174.771 | 1945.858 | 1681.74 | 1376.76 | 0.428852675 | 0.019664 | 0.079494 | 2310011J03Rik |
| 51.92862 | 53.48212 | 19.1107 | 20.7307 | 1.406564377 | 0.019709 | 0.079605 | Preld3a       |
| 408.159  | 344.0683 | 271.024 | 217.063 | 0.620026104 | 0.019753 | 0.079725 | Kti12         |
| 393.6189 | 393.985  | 239.752 | 291.449 | 0.571354161 | 0.019785 | 0.079813 | Dclrela       |
| 1.038572 | 155.0981 | 0.86867 | 0       | 7.303222874 | 0.019797 | 0.079822 | Igkv17-121    |
| 1708.452 | 1629.422 | 1350.78 | 1204.82 | 0.384296632 | 0.01989  | 0.080132 | Spg21         |
| 127.7444 | 122.1175 | 66.0187 | 69.5088 | 0.88356881  | 0.019894 | 0.080132 | Necab3        |
| 1428.037 | 1304.072 | 1110.16 | 760.939 | 0.544091165 | 0.019912 | 0.080149 | Ncbp2         |
| 2390.794 | 2003.797 | 453.444 | 45.1198 | 3.138908176 | 0.019913 | 0.080149 | Dsp           |
| 2009.638 | 1666.859 | 1467.18 | 1207.26 | 0.45782275  | 0.019953 | 0.080251 | Pgp           |
| 846.4365 | 755.8806 | 613.279 | 554.851 | 0.454380742 | 0.02001  | 0.080461 | Crtc1         |
| 59.19863 | 29.41517 | 13.8987 | 12.1945 | 1.756399871 | 0.020019 | 0.080463 | CT025660.2    |
| 2900.733 | 2516.334 | 1826.81 | 2213.31 | 0.423688103 | 0.020026 | 0.080463 | Smo           |
| 524.4791 | 446.5757 | 362.234 | 285.352 | 0.580859667 | 0.020057 | 0.080568 | Atxn712       |
| 1071.807 | 1033.096 | 845.213 | 690.211 | 0.453217002 | 0.020095 | 0.08066  | Magoh         |
| 7941.963 | 6957.132 | 5796.62 | 5950.93 | 0.342828383 | 0.020162 | 0.080904 | Akt2          |
| 1178.78  | 909.196  | 648.026 | 799.961 | 0.528981967 | 0.020166 | 0.080904 | Abcd3         |
| 237.8331 | 126.5744 | 86.8667 | 96.3368 | 0.991572578 | 0.020206 | 0.081045 | Siglecg       |
| 50.89005 | 73.09223 | 26.06   | 3.65836 | 2.030068217 | 0.020225 | 0.081102 | Pparg         |
| 6.231435 | 10.69642 | 0       | 0       | 5.484329604 | 0.020279 | 1        | Kcnip1        |
| 1433.23  | 1138.278 | 927.737 | 948.735 | 0.45423453  | 0.02035  | 0.081499 | Nsmce4a       |
| 439.3161 | 375.2662 | 291.872 | 256.085 | 0.569241258 | 0.020389 | 0.081617 | Ptges2        |
| 4714.08  | 4854.394 | 4007.16 | 3470.56 | 0.355289149 | 0.020442 | 0.081786 | Mat2a         |
| 244.0645 | 223.7335 | 135.512 | 157.309 | 0.678389424 | 0.020455 | 0.081819 | Cep131        |
| 11984.09 | 9550.124 | 8214.12 | 8213.02 | 0.390467307 | 0.020599 | 0.082273 | Sfpq          |
| 1024.032 | 925.2407 | 742.711 | 717.039 | 0.416468659 | 0.020604 | 0.082273 | Prps113       |
| 0        | 52.59075 | 0.86867 | 1.21945 | 4.674126322 | 0.020626 | 0.08232  | Iglv2         |
| 3005.629 | 2826.53  | 2434.01 | 1756.01 | 0.47606168  | 0.02068  | 0.082494 | Ap1m1         |
| 582.6391 | 519.6679 | 379.608 | 404.858 | 0.491163168 | 0.020714 | 0.08261  | 4931406P16Rik |
| 1167.355 | 1240.785 | 954.666 | 871.909 | 0.398099365 | 0.020735 | 0.082675 | Depdc5        |
| 9969.257 | 9108.896 | 7941.36 | 7103.32 | 0.342443395 | 0.020772 | 0.082779 | Brd2          |
| 24.92574 | 18.71874 | 5.212   | 1.21945 | 2.703221104 | 0.020788 | 0.082822 | Gm9134        |
| 645.992  | 518.7766 | 398.718 | 412.175 | 0.522044859 | 0.020799 | 0.082846 | Gm8991        |
| 750.8879 | 686.3539 | 534.231 | 521.926 | 0.443788277 | 0.020845 | 0.082965 | Rsrc1         |
| 4006.812 | 3494.165 | 3043.81 | 2744.99 | 0.373300843 | 0.020849 | 0.082965 | Usp5          |
| 2401.179 | 2108.087 | 1722.57 | 1764.55 | 0.370749072 | 0.020875 | 0.083037 | Gmps          |
| 1514.239 | 1353.989 | 1079.75 | 1112.14 | 0.387921278 | 0.020878 | 0.083037 | Thyn1         |
| 650.1463 | 603.4566 | 460.394 | 452.417 | 0.457097828 | 0.020908 | 0.083138 | Sirt1         |
| 45.69719 | 51.69938 | 19.1107 | 15.8529 | 1.472563704 | 0.020971 | 0.083368 | Nme2          |
| 2899.694 | 2428.98  | 2107.39 | 1938.93 | 0.396551979 | 0.020997 | 0.083451 | Gipc1         |
| 1571.36  | 1526.023 | 1251.75 | 1129.21 | 0.378589147 | 0.021038 | 0.08357  | Rbm27         |
| 5106.661 | 4819.63  | 4153.1  | 3583.97 | 0.359001398 | 0.021052 | 0.083586 | Ankrd52       |
| 13128.59 | 12538.88 | 9523.2  | 10826.3 | 0.335085583 | 0.021052 | 0.083586 | Lck           |

|          |          |         |         |             |          |          |               |
|----------|----------|---------|---------|-------------|----------|----------|---------------|
| 15.57859 | 54.37349 | 9.55534 | 3.65836 | 2.379247838 | 0.021087 | 0.083706 | Kcnip3        |
| 258.6045 | 203.2321 | 148.542 | 131.701 | 0.717224504 | 0.021138 | 0.083847 | Gm10521       |
| 1425.96  | 1331.705 | 1090.18 | 1026.78 | 0.38071161  | 0.021162 | 0.083921 | Nup54         |
| 124.6287 | 139.9449 | 62.5441 | 80.4839 | 0.89392059  | 0.021201 | 0.084013 | Pard6g        |
| 2647.321 | 2258.728 | 1805.96 | 1945.03 | 0.38740314  | 0.021261 | 0.084228 | Nudt21        |
| 293.916  | 224.6249 | 153.754 | 167.065 | 0.692855162 | 0.021315 | 0.0844   | Zfp41         |
| 228.4859 | 225.5163 | 153.754 | 128.043 | 0.684263546 | 0.021348 | 0.08447  | Nmnat3        |
| 102.8187 | 61.50444 | 41.696  | 17.0723 | 1.464482615 | 0.021442 | 0.084711 | Rsg1          |
| 378.0404 | 279.8898 | 228.46  | 174.382 | 0.702968666 | 0.021442 | 0.084711 | Traf3ip1      |
| 1513.2   | 1362.011 | 1170.96 | 902.395 | 0.469941661 | 0.021443 | 0.084711 | Isg2012       |
| 95.54866 | 92.70234 | 47.7767 | 8.53617 | 1.719316213 | 0.02145  | 0.084711 | Gpr45         |
| 65.43006 | 66.85265 | 31.272  | 24.3891 | 1.241654952 | 0.021466 | 0.084717 | Fam89a        |
| 2093.762 | 1930.705 | 1636.57 | 1460.91 | 0.376825685 | 0.021473 | 0.084717 | Preli3b       |
| 2326.402 | 1641.01  | 1325.59 | 1465.78 | 0.507214374 | 0.02149  | 0.08476  | Itga4         |
| 3054.441 | 2736.502 | 2387.1  | 2012.1  | 0.39573176  | 0.021554 | 0.084995 | Txn2          |
| 1482.043 | 1441.343 | 1106.68 | 1162.14 | 0.366055966 | 0.021561 | 0.085    | Ddx10         |
| 3413.788 | 2579.621 | 2297.63 | 2084.05 | 0.451325881 | 0.021603 | 0.085143 | Gramd4        |
| 44.65861 | 22.28422 | 10.424  | 4.87781 | 2.100520699 | 0.02161  | 0.085152 | Apol10b       |
| 34.27289 | 24.95832 | 7.81801 | 0       | 2.849940487 | 0.021619 | 0.085166 | Nrxn2         |
| 479.8205 | 389.5281 | 300.559 | 290.23  | 0.555852306 | 0.021808 | 0.08579  | Rmi2          |
| 19.73288 | 25.84969 | 5.212   | 0       | 3.042101185 | 0.021809 | 0.08579  | Sult4a1       |
| 458.0104 | 412.7037 | 315.326 | 289.01  | 0.524921107 | 0.021946 | 0.086245 | Fadd          |
| 1386.494 | 1133.821 | 978.988 | 859.715 | 0.45352477  | 0.021992 | 0.086383 | Mrpl37        |
| 2363.791 | 2356.779 | 1963.19 | 1649.92 | 0.384827015 | 0.022066 | 0.086625 | Kpna3         |
| 23.88717 | 3.565475 | 0.86867 | 0       | 4.771939716 | 0.022069 | 0.086625 | Trav3d-3      |
| 4.15429  | 78.44044 | 6.94934 | 0       | 3.5191663   | 0.02207  | 0.086625 | Igkv10-96     |
| 2935.006 | 2588.535 | 2202.07 | 2099.9  | 0.360157939 | 0.022077 | 0.086632 | Bms1          |
| 4409.778 | 3882.802 | 3463.38 | 2570.61 | 0.457982565 | 0.022125 | 0.086777 | Cdc34         |
| 666.7635 | 510.7542 | 421.304 | 384.128 | 0.545985386 | 0.022168 | 0.086914 | Rcc1l         |
| 1818.54  | 1809.478 | 1488.9  | 1303.6  | 0.376703036 | 0.02217  | 0.086914 | Pds5b         |
| 1556.82  | 1386.97  | 1123.19 | 1135.31 | 0.382086475 | 0.022344 | 0.087444 | Prpf4         |
| 260.6817 | 198.7752 | 137.249 | 142.676 | 0.714232625 | 0.022355 | 0.087469 | N6amt1        |
| 168.2487 | 96.26782 | 66.8874 | 62.1921 | 1.031367591 | 0.022393 | 0.087572 | Pdia5         |
| 410.2361 | 341.3942 | 239.752 | 264.621 | 0.576239755 | 0.022435 | 0.087719 | Srcap         |
| 1596.286 | 1459.171 | 1243.06 | 1047.51 | 0.414300247 | 0.022458 | 0.087786 | Itpa          |
| 889.018  | 841.452  | 687.985 | 574.362 | 0.453000458 | 0.022541 | 0.08809  | Pigu          |
| 2499.844 | 2068.867 | 1799.01 | 1652.36 | 0.40391418  | 0.022559 | 0.088137 | Get4          |
| 149.5544 | 106.9642 | 73.8367 | 57.3143 | 0.96073621  | 0.022591 | 0.0882   | Hmgn2-ps1     |
| 97.62581 | 82.89729 | 46.908  | 40.242  | 1.045488157 | 0.022629 | 0.088308 | Fbxo10        |
| 3596.576 | 3096.615 | 2736.3  | 2359.64 | 0.392665585 | 0.022697 | 0.088504 | Msl2          |
| 6014.373 | 4640.465 | 3673.59 | 4216.87 | 0.433431599 | 0.022697 | 0.088504 | Nup62         |
| 2958.893 | 2778.396 | 2267.22 | 2296.23 | 0.33019663  | 0.022727 | 0.088601 | Rbm15         |
| 1919.282 | 1666.859 | 1263.91 | 1443.83 | 0.40587385  | 0.022756 | 0.088694 | Prps2         |
| 3556.072 | 3216.058 | 2780.6  | 2508.42 | 0.356057647 | 0.022815 | 0.088889 | 4930533O14Rik |
| 176.5573 | 134.5967 | 90.3414 | 84.1423 | 0.831496549 | 0.022841 | 0.088908 | Phf21b        |

|          |          |         |         |             |          |          |               |
|----------|----------|---------|---------|-------------|----------|----------|---------------|
| 359.3461 | 358.3302 | 228.46  | 260.963 | 0.554584638 | 0.022842 | 0.088908 | Aldh1b1       |
| 1455.04  | 1308.529 | 1125.79 | 886.543 | 0.4559134   | 0.022844 | 0.088908 | Arhgef12      |
| 1012.608 | 836.1038 | 651.501 | 697.527 | 0.454679281 | 0.02295  | 0.089253 | Ipo11         |
| 103.8572 | 96.26782 | 57.3321 | 40.242  | 1.027239548 | 0.023022 | 0.089512 | Rubcnl        |
| 34.27289 | 15.15327 | 6.08067 | 2.43891 | 2.497112484 | 0.023196 | 0.090018 | Rnf39         |
| 1083.231 | 848.583  | 627.178 | 740.208 | 0.499256344 | 0.023279 | 0.090296 | Cep152        |
| 4364.081 | 4147.538 | 3577.17 | 3043.76 | 0.36184642  | 0.023317 | 0.090421 | Nadk          |
| 7793.447 | 6668.329 | 5624.62 | 5747.28 | 0.34671129  | 0.023327 | 0.090436 | Mta2          |
| 1057.267 | 1012.595 | 810.467 | 767.036 | 0.391125898 | 0.02341  | 0.090651 | Cops3         |
| 2993.166 | 2629.538 | 2275.04 | 2085.27 | 0.366238986 | 0.023481 | 0.090853 | Arhgap1       |
| 68.54578 | 46.35117 | 23.454  | 20.7307 | 1.372835433 | 0.023485 | 0.090853 | Map3k9        |
| 15.57859 | 14.2619  | 0.86867 | 2.43891 | 3.23336052  | 0.023501 | 0.090891 | D430019H16Rik |
| 299.1089 | 237.1041 | 167.653 | 173.162 | 0.65321382  | 0.023506 | 0.090891 | Abhd6         |
| 447.6247 | 334.2632 | 241.49  | 269.499 | 0.614032392 | 0.02355  | 0.090974 | Mcm8          |
| 3245.539 | 2945.973 | 2383.62 | 2504.76 | 0.341016149 | 0.023563 | 0.091002 | Rrp1b         |
| 1527.74  | 1141.843 | 707.964 | 1057.27 | 0.598095867 | 0.02357  | 0.091009 | Knstrn        |
| 1638.867 | 1600.007 | 1267.39 | 1275.55 | 0.348984016 | 0.023589 | 0.091041 | Ttl4          |
| 3341.087 | 2885.36  | 2547.8  | 2202.33 | 0.389723925 | 0.023647 | 0.091212 | Pdap1         |
| 157.863  | 215.7112 | 111.189 | 106.092 | 0.782502554 | 0.023651 | 0.091212 | Prkcz         |
| 398.8118 | 402.8986 | 264.944 | 293.888 | 0.522504976 | 0.023774 | 0.091553 | Aoc2          |
| 1854.89  | 1572.374 | 1387.26 | 1131.65 | 0.442879666 | 0.023782 | 0.091563 | Snrpc         |
| 1121.658 | 947.5249 | 774.851 | 764.597 | 0.426008641 | 0.023866 | 0.091756 | Nup133        |
| 597.1791 | 444.793  | 359.628 | 345.105 | 0.562661185 | 0.023965 | 0.09207  | Yars2         |
| 3471.948 | 3244.582 | 2756.28 | 2579.14 | 0.331706953 | 0.024006 | 0.092186 | Hnrnpr        |
| 1765.573 | 1532.263 | 1322.11 | 1170.68 | 0.402660637 | 0.024046 | 0.092311 | Fmr1          |
| 486.0519 | 372.5921 | 284.923 | 291.449 | 0.574296757 | 0.024051 | 0.092311 | Tex30         |
| 88.27866 | 44.56843 | 30.4034 | 14.6334 | 1.541954058 | 0.02406  | 0.092323 | Rtn2          |
| 87.24008 | 60.61307 | 26.9287 | 36.5836 | 1.225136999 | 0.024066 | 0.092323 | Gm11579       |
| 1240.055 | 966.2436 | 812.204 | 787.767 | 0.462748444 | 0.024071 | 0.092323 | Lsm8          |
| 1953.555 | 1653.489 | 1364.68 | 1390.18 | 0.388613507 | 0.024181 | 0.092702 | U2af1         |
| 22.84859 | 23.17559 | 3.47467 | 6.09727 | 2.290896752 | 0.024198 | 0.092744 | Gm26571       |
| 401.9275 | 300.3912 | 231.934 | 224.379 | 0.62037767  | 0.024311 | 0.093088 | Cmss1         |
| 183.8273 | 95.37645 | 79.0487 | 24.3891 | 1.418303924 | 0.024327 | 0.093124 | Unc13b        |
| 2574.621 | 2309.536 | 1921.49 | 1915.76 | 0.34781104  | 0.024332 | 0.093124 | Dnajc2        |
| 2869.576 | 2569.816 | 2230.74 | 1984.05 | 0.367269358 | 0.024372 | 0.093244 | Zfp706        |
| 109.0501 | 69.52676 | 46.0394 | 32.9252 | 1.167388942 | 0.024375 | 0.093244 | Kbtbd6        |
| 16.61716 | 10.69642 | 1.73733 | 0       | 3.840607041 | 0.024384 | 0.093256 | Slc38a8       |
| 3.115717 | 24.95832 | 0       | 1.21945 | 4.721307915 | 0.024393 | 0.093261 | Igkv8-24      |
| 2545.541 | 2142.85  | 1799.01 | 1806.01 | 0.378817443 | 0.024397 | 0.093261 | Axin1         |
| 380.1175 | 311.0877 | 242.358 | 214.624 | 0.594082879 | 0.024414 | 0.093307 | Mapkapk5      |
| 1574.476 | 1505.522 | 1233.51 | 1168.24 | 0.358253173 | 0.024429 | 0.093342 | Wdr36         |
| 955.4866 | 890.4773 | 630.653 | 737.769 | 0.433234828 | 0.024538 | 0.093714 | G2e3          |
| 197.3288 | 160.4464 | 116.401 | 89.0201 | 0.794164131 | 0.024573 | 0.093822 | Xkr5          |
| 59.19863 | 32.08927 | 13.8987 | 15.8529 | 1.618467677 | 0.024606 | 0.093927 | Amotl2        |
| 2.077145 | 34.76338 | 1.73733 | 0       | 4.297571352 | 0.024622 | 0.093965 | Igkv6-23      |

|          |          |         |         |             |          |          |               |
|----------|----------|---------|---------|-------------|----------|----------|---------------|
| 7282.47  | 6896.519 | 5940.82 | 5430.23 | 0.318140667 | 0.024643 | 0.094026 | Cct8          |
| 30.1186  | 25.84969 | 8.68667 | 1.21945 | 2.441922729 | 0.024654 | 0.094045 | Fhit          |
| 219.1388 | 123.0089 | 36.484  | 104.873 | 1.284954657 | 0.024663 | 0.094058 | Ramp1         |
| 456.9719 | 402.8986 | 324.013 | 252.427 | 0.57304484  | 0.024742 | 0.094293 | Tada2a        |
| 352.076  | 366.3525 | 270.156 | 191.454 | 0.633580513 | 0.024755 | 0.094319 | Atrnl1        |
| 5583.365 | 5037.124 | 4451.92 | 3780.31 | 0.367026299 | 0.024819 | 0.094495 | Dbnl          |
| 1148.661 | 1017.052 | 814.81  | 826.789 | 0.399489252 | 0.024879 | 0.094677 | 1190002N15Rik |
| 18835.55 | 16664.14 | 13419.2 | 14754.2 | 0.333521059 | 0.024899 | 0.094733 | Hnrnpa1       |
| 121.513  | 126.5744 | 11.2927 | 0       | 4.435127639 | 0.025016 | 0.095089 | Zbtb7c        |
| 2354.444 | 2040.343 | 1713.88 | 1696.26 | 0.365630287 | 0.025031 | 0.095121 | Ndufv1        |
| 2941.237 | 2817.616 | 2188.17 | 2381.59 | 0.334023064 | 0.025119 | 0.095414 | Phf2          |
| 85.16294 | 83.78865 | 47.7767 | 21.9502 | 1.260372003 | 0.025133 | 0.095444 | Fam171a1      |
| 32.19574 | 37.43748 | 11.2927 | 9.75563 | 1.721536511 | 0.025165 | 0.095529 | Ret           |
| 3347.319 | 3036.893 | 2678.1  | 2114.53 | 0.412833825 | 0.025168 | 0.095529 | Psmc1         |
| 1220.323 | 1034.879 | 857.375 | 834.106 | 0.414246018 | 0.025205 | 0.095612 | Mrpl42        |
| 1252.518 | 708.6381 | 555.947 | 671.919 | 0.675741466 | 0.025271 | 0.095782 | Pbdc1         |
| 5336.185 | 5173.504 | 4186.11 | 4335.16 | 0.302662344 | 0.025271 | 0.095782 | Pds5a         |
| 2077.145 | 2133.937 | 1633.96 | 1707.23 | 0.334196514 | 0.025276 | 0.095782 | Rad50         |
| 69.58435 | 73.09223 | 18.242  | 39.0225 | 1.335120711 | 0.025286 | 0.095799 | Samd3         |
| 7982.468 | 6605.933 | 6042.45 | 4914.4  | 0.412614635 | 0.02537  | 0.096073 | Ankrd13a      |
| 774.775  | 709.5295 | 423.91  | 596.313 | 0.543597888 | 0.025425 | 0.096235 | Synj2         |
| 450.7404 | 451.9239 | 314.458 | 330.472 | 0.485899515 | 0.02547  | 0.096337 | Dhdh1         |
| 1773.882 | 1239.002 | 1143.17 | 937.76  | 0.532586569 | 0.025562 | 0.096618 | Tlnrd1        |
| 92.43295 | 53.48212 | 36.484  | 15.8529 | 1.460078818 | 0.025571 | 0.09663  | Unc5a         |
| 667.8021 | 650.6991 | 507.302 | 465.831 | 0.436894021 | 0.025627 | 0.096756 | Exosc1        |
| 1215.13  | 1092.818 | 917.313 | 828.009 | 0.401860885 | 0.025677 | 0.096917 | Sppl3         |
| 76000.65 | 71045.65 | 62425.9 | 55794.9 | 0.314756455 | 0.025791 | 0.097255 | Hsp90ab1      |
| 6210.663 | 5690.498 | 4782.88 | 4807.08 | 0.311435002 | 0.025837 | 0.097381 | Ep400         |
| 1637.829 | 1410.145 | 1193.55 | 1134.09 | 0.388244929 | 0.025893 | 0.097572 | Nop9          |
| 1186.05  | 1131.147 | 952.928 | 713.38  | 0.473639548 | 0.025999 | 0.097877 | Msto1         |
| 33.23432 | 30.30653 | 11.2927 | 4.87781 | 1.944853188 | 0.02607  | 0.098095 | Mst1r         |
| 8829.943 | 8153.349 | 7151.74 | 6353.35 | 0.330356746 | 0.026075 | 0.098095 | Psmc2         |
| 1310.678 | 1066.077 | 938.161 | 785.328 | 0.461969305 | 0.026085 | 0.09811  | L3mbtl2       |
| 2510.23  | 2296.166 | 1933.65 | 1864.54 | 0.339247546 | 0.026165 | 0.09839  | Agap3         |
| 840.2051 | 644.4595 | 523.806 | 528.023 | 0.496515949 | 0.026198 | 0.098444 | Kat14         |
| 779.9679 | 545.5176 | 474.292 | 415.834 | 0.572381545 | 0.026224 | 0.0985   | Nudt19        |
| 43.62004 | 26.74106 | 12.1613 | 7.31672 | 1.833096043 | 0.026286 | 0.098682 | Nmnat2        |
| 593.0249 | 509.8629 | 362.234 | 418.272 | 0.500073705 | 0.026335 | 0.098821 | Ssx2ip        |
| 10203.97 | 10499.43 | 7670.33 | 8827.62 | 0.327799723 | 0.02643  | 0.099064 | H2afy         |
| 9.347152 | 6.239581 | 0       | 0       | 5.361891204 | 0.026445 | 1        | Nog           |
| 9.347152 | 6.239581 | 0       | 0       | 5.361891204 | 0.026445 | 1        | Abhd12b       |
| 303.2631 | 308.4136 | 190.238 | 220.721 | 0.576606088 | 0.026526 | 0.099398 | Rpusd2        |
| 1332.488 | 1449.365 | 1110.16 | 1041.41 | 0.370343416 | 0.026532 | 0.099398 | Ipol3         |
| 674.0335 | 670.3092 | 528.15  | 454.856 | 0.449701057 | 0.026597 | 0.099596 | Dcun1d2       |
| 17703.51 | 17152.61 | 14982.8 | 12070.1 | 0.365465359 | 0.026615 | 0.099607 | Eif4g2        |

|          |          |         |         |             |          |          |               |
|----------|----------|---------|---------|-------------|----------|----------|---------------|
| 101.7801 | 173.8169 | 70.3621 | 70.7283 | 0.968326142 | 0.026627 | 0.099615 | Rragd         |
| 208.7531 | 169.36   | 121.613 | 104.873 | 0.735244451 | 0.026675 | 0.099773 | Haus5         |
| 209.7916 | 150.6413 | 99.0281 | 109.751 | 0.78807399  | 0.026781 | 0.100076 | Cryl1         |
| 28.04146 | 17.82737 | 6.08067 | 2.43891 | 2.389348734 | 0.026814 | 0.100176 | Klhl4         |
| 193.1745 | 207.6889 | 133.775 | 114.629 | 0.687605536 | 0.026838 | 0.100218 | Slc27a3       |
| 1283.676 | 1278.223 | 1028.5  | 412.175 | 0.828246727 | 0.026929 | 0.100534 | Car5b         |
| 795.5465 | 837.8865 | 649.763 | 560.949 | 0.430582456 | 0.026942 | 0.100561 | Yrdc          |
| 712.4607 | 624.8494 | 467.343 | 509.731 | 0.453363975 | 0.026985 | 0.100698 | Ccdc34        |
| 1743.763 | 1627.639 | 1399.42 | 1136.53 | 0.409442271 | 0.026997 | 0.100719 | Ncoa5         |
| 7265.853 | 6668.329 | 5901.73 | 4992.44 | 0.3547062   | 0.027028 | 0.10081  | Uck2          |
| 23959.87 | 12125.29 | 6959.76 | 2137.7  | 1.987780619 | 0.027042 | 0.100842 | Spp1          |
| 207.7145 | 199.6666 | 143.33  | 82.9228 | 0.840019493 | 0.027055 | 0.100866 | Lgals7        |
| 701.0364 | 585.6292 | 462.131 | 468.27  | 0.467175283 | 0.027238 | 0.101455 | Prmt3         |
| 179.673  | 142.619  | 98.1594 | 89.0201 | 0.780524999 | 0.027289 | 0.101572 | Ddx59         |
| 1034.418 | 1022.4   | 797.437 | 790.206 | 0.373379328 | 0.027326 | 0.101665 | Eny2          |
| 368.6932 | 282.5639 | 237.146 | 156.09  | 0.721953757 | 0.027326 | 0.101665 | Fancf         |
| 314.6874 | 241.5609 | 192.844 | 154.871 | 0.673233412 | 0.02748  | 0.102119 | Tsen2         |
| 471.5119 | 450.1412 | 359.628 | 228.038 | 0.644510076 | 0.027618 | 0.102607 | Lsm5          |
| 1017.801 | 836.1038 | 707.964 | 653.627 | 0.443941835 | 0.02768  | 0.102795 | Mrpl41        |
| 1573.437 | 1517.109 | 1205.71 | 1229.21 | 0.344049331 | 0.027759 | 0.103014 | Srek1         |
| 153.7087 | 172.9255 | 110.321 | 62.1921 | 0.911996094 | 0.027865 | 0.103335 | Npnt          |
| 125.6673 | 114.9866 | 73.8367 | 54.8754 | 0.895432478 | 0.027933 | 0.103541 | Nudt6         |
| 98.66438 | 61.50444 | 38.2214 | 32.9252 | 1.164612199 | 0.027967 | 0.103642 | 4930513N10Rik |
| 3274.619 | 2709.761 | 2440.09 | 2090.14 | 0.400869574 | 0.027976 | 0.103651 | Oxsr1         |
| 672.9949 | 468.8599 | 431.728 | 265.841 | 0.70690311  | 0.028425 | 0.105048 | Tmem238       |
| 695.8435 | 601.6738 | 455.182 | 491.44  | 0.455282045 | 0.028491 | 0.105247 | Btbd6         |
| 345.8446 | 310.1963 | 194.582 | 242.671 | 0.588381165 | 0.028618 | 0.105521 | Magi3         |
| 1799.846 | 1537.611 | 1307.34 | 1259.7  | 0.378038653 | 0.028649 | 0.105612 | Trmt2a        |
| 4.15429  | 11.58779 | 0       | 0       | 5.380882899 | 0.028678 | 1        | Gm14151       |
| 5702.801 | 5522.029 | 4752.48 | 4246.14 | 0.318578801 | 0.028687 | 0.105698 | Vdac1         |
| 625.2206 | 591.8688 | 443.02  | 458.514 | 0.433223296 | 0.028729 | 0.105786 | Orc5          |
| 309.4946 | 286.1293 | 201.531 | 202.429 | 0.559816104 | 0.028749 | 0.105836 | Zfp961        |
| 3558.149 | 3115.333 | 2596.45 | 2679.14 | 0.339054246 | 0.028776 | 0.105863 | Rnpepl1       |
| 2308.746 | 2418.283 | 1871.98 | 1912.1  | 0.321227618 | 0.02879  | 0.10588  | Ppp4r2        |
| 262.7588 | 243.3436 | 183.289 | 130.482 | 0.683793195 | 0.028794 | 0.10588  | F2rl3         |
| 788.2765 | 802.2318 | 630.653 | 562.168 | 0.413789096 | 0.028841 | 0.106003 | Cdyl          |
| 862.0151 | 869.0844 | 681.904 | 635.335 | 0.393345285 | 0.028876 | 0.106083 | Fam206a       |
| 209.7916 | 197.8838 | 143.33  | 97.5563 | 0.75206022  | 0.028909 | 0.106183 | Ift74         |
| 41.5429  | 55.26486 | 20.848  | 14.6334 | 1.438855156 | 0.028919 | 0.106195 | Ankrd29       |
| 391.5418 | 483.1218 | 285.792 | 318.277 | 0.536430772 | 0.029065 | 0.106611 | Armxc4        |
| 19.73288 | 28.5238  | 6.08067 | 4.87781 | 2.131353098 | 0.029066 | 0.106611 | Baiap212      |
| 833.9737 | 1083.013 | 759.215 | 552.412 | 0.545965794 | 0.029115 | 0.106721 | Dlg2          |
| 17.65573 | 16.04464 | 3.47467 | 1.21945 | 2.792983295 | 0.029141 | 0.106791 | Fzd3          |
| 356.2303 | 345.851  | 264.944 | 202.429 | 0.582836531 | 0.029309 | 0.107283 | Eif5a2        |
| 962.7566 | 777.2735 | 685.379 | 547.535 | 0.494681318 | 0.029351 | 0.107391 | Atpaf2        |



|          |          |         |         |             |          |          |            |
|----------|----------|---------|---------|-------------|----------|----------|------------|
| 3112.602 | 2523.465 | 2128.24 | 2199.89 | 0.380806924 | 0.029636 | 0.108237 | Rexo1      |
| 418.5447 | 436.7706 | 318.801 | 289.01  | 0.491432428 | 0.029675 | 0.10833  | Ttll3      |
| 3973.578 | 4213.5   | 3467.72 | 2984    | 0.343239315 | 0.029829 | 0.108789 | Exoc4      |
| 876.5551 | 803.1232 | 683.641 | 498.756 | 0.503699304 | 0.029835 | 0.108789 | Slc45a4    |
| 4426.396 | 3641.241 | 3084.64 | 3187.65 | 0.363060831 | 0.02997  | 0.109159 | Lta4h      |
| 1504.891 | 1299.616 | 1068.46 | 1088.97 | 0.378199318 | 0.030065 | 0.109342 | Pim3       |
| 1309.64  | 1183.738 | 1012.87 | 880.445 | 0.395762149 | 0.030086 | 0.109358 | Champ1     |
| 10.38572 | 10.69642 | 0.86867 | 0       | 4.394106302 | 0.030127 | 1        | Gm37729    |
| 181.7502 | 235.3213 | 138.118 | 115.848 | 0.713724096 | 0.030158 | 0.109578 | Arntl2     |
| 19.73288 | 25.84969 | 6.08067 | 3.65836 | 2.206469221 | 0.03017  | 0.109578 | AC153512.1 |
| 221.2159 | 203.2321 | 139.855 | 131.701 | 0.642537886 | 0.030183 | 0.109588 | Ercc8      |
| 35.31146 | 34.76338 | 13.8987 | 3.65836 | 1.959793213 | 0.030209 | 0.109657 | Mras       |
| 33824.23 | 30649.71 | 27830.4 | 20535.6 | 0.414624838 | 0.03026  | 0.109776 | Eif5a      |
| 5622.831 | 5014.84  | 4298.17 | 4247.36 | 0.315795053 | 0.030262 | 0.109776 | Atp5g3     |
| 78.9315  | 90.02824 | 46.0394 | 36.5836 | 1.026818701 | 0.030318 | 0.109956 | Echdc2     |
| 1836.196 | 1710.536 | 1315.16 | 1459.69 | 0.354646718 | 0.030433 | 0.110316 | Ddi2       |
| 2509.191 | 2262.294 | 2006.62 | 1592.61 | 0.405661049 | 0.030438 | 0.110316 | Ciapi1     |
| 76.85436 | 59.7217  | 33.0094 | 28.0474 | 1.155384838 | 0.030482 | 0.110424 | Farp2      |
| 1052.074 | 937.7198 | 761.821 | 757.28  | 0.38893719  | 0.030643 | 0.11091  | Fbxo21     |
| 2126.996 | 1897.724 | 1626.15 | 1530.41 | 0.349911579 | 0.030645 | 0.11091  | Sf3a3      |
| 1083.231 | 1060.729 | 857.375 | 801.181 | 0.369549412 | 0.030695 | 0.110997 | Usp31      |
| 6252.206 | 5396.346 | 4846.3  | 4279.06 | 0.351822095 | 0.030709 | 0.110997 | Psmb4      |
| 8189.144 | 6974.96  | 6000.76 | 6050.93 | 0.331341473 | 0.030717 | 0.111003 | Ddx3x      |
| 253.4117 | 217.494  | 160.703 | 141.457 | 0.63680643  | 0.030751 | 0.1111   | Adal       |
| 1271.213 | 1148.083 | 944.242 | 928.004 | 0.369330555 | 0.030792 | 0.111198 | Ppp1r7     |
| 3469.87  | 3154.554 | 2633.8  | 2679.14 | 0.318215498 | 0.030943 | 0.111669 | Prkd2      |
| 1107.118 | 1014.378 | 833.052 | 799.961 | 0.376819393 | 0.030948 | 0.111669 | Pus7       |
| 848.5137 | 642.6768 | 568.977 | 470.709 | 0.517960045 | 0.031001 | 0.111706 | Pdp1       |
| 898.3651 | 815.6023 | 689.722 | 574.362 | 0.437115539 | 0.031009 | 0.111706 | Cars2      |
| 678.1878 | 597.217  | 469.949 | 471.928 | 0.436854133 | 0.031107 | 0.11201  | Gmeb1      |
| 2771.95  | 2561.794 | 2178.62 | 2085.27 | 0.322593761 | 0.031135 | 0.112087 | Smg7       |
| 965.8723 | 920.7838 | 779.195 | 531.682 | 0.522656822 | 0.031168 | 0.112131 | Mcur1      |
| 129.8216 | 119.4434 | 78.1801 | 58.5338 | 0.859448215 | 0.031216 | 0.112252 | Gm14276    |
| 2058.451 | 1862.069 | 1581.84 | 1509.68 | 0.342188028 | 0.031381 | 0.112794 | Pcif1      |
| 1566.167 | 1074.991 | 876.486 | 979.221 | 0.509198841 | 0.031515 | 0.113151 | Dctpp1     |
| 2052.219 | 1818.392 | 1492.37 | 1547.49 | 0.348530601 | 0.031603 | 0.113391 | Slc25a17   |
| 632.4906 | 522.342  | 299.69  | 458.514 | 0.6101372   | 0.031645 | 0.113491 | Troap      |
| 1040.65  | 891.3687 | 679.298 | 764.597 | 0.420787097 | 0.031659 | 0.1135   | Exosc7     |
| 771.6593 | 671.2006 | 528.15  | 545.096 | 0.426787997 | 0.031668 | 0.1135   | Polr1e     |
| 620.0277 | 601.6738 | 419.566 | 480.465 | 0.442549299 | 0.031749 | 0.113726 | McpH1      |
| 526.5562 | 463.5117 | 390.032 | 262.182 | 0.597810035 | 0.031813 | 0.113916 | Smco4      |
| 703.1135 | 679.2229 | 514.251 | 529.243 | 0.405927565 | 0.031905 | 0.114195 | Med4       |
| 1423.883 | 1232.763 | 989.412 | 1051.17 | 0.380733125 | 0.031929 | 0.114256 | Abcd1      |
| 1769.727 | 1413.711 | 1263.91 | 1110.92 | 0.421624065 | 0.032204 | 0.114987 | Klf16      |
| 1372.993 | 1282.68  | 1064.12 | 1013.37 | 0.35358092  | 0.032249 | 0.115118 | Xrcc1      |

|          |          |         |         |             |          |          |               |
|----------|----------|---------|---------|-------------|----------|----------|---------------|
| 121.513  | 133.7053 | 76.4427 | 69.5088 | 0.804551854 | 0.03235  | 0.115456 | Kif5c         |
| 1293.023 | 1254.156 | 1018.95 | 981.66  | 0.347994943 | 0.032513 | 0.115908 | Dnttip2       |
| 2852.958 | 2486.027 | 2128.24 | 2091.36 | 0.339146705 | 0.032596 | 0.116129 | Lrwd1         |
| 4858.442 | 4382.86  | 3872.52 | 3485.2  | 0.328415554 | 0.032678 | 0.116303 | Mapre1        |
| 1817.502 | 2407.587 | 1380.31 | 1695.04 | 0.45930167  | 0.032686 | 0.116303 | Sema4f        |
| 422.699  | 385.0713 | 301.428 | 267.06  | 0.504389734 | 0.032697 | 0.116308 | Bcl2a1b       |
| 720.7693 | 731.8137 | 537.705 | 564.607 | 0.398812534 | 0.032775 | 0.11656  | Slc9a5        |
| 1632.636 | 1500.173 | 1250.88 | 1217.01 | 0.343719413 | 0.03279  | 0.116583 | Ppp1r11       |
| 1923.436 | 1912.877 | 1517.56 | 1557.24 | 0.319407546 | 0.032805 | 0.116587 | Crebbp        |
| 620.0277 | 534.8212 | 443.02  | 390.225 | 0.468664875 | 0.032813 | 0.116591 | Gm10039       |
| 502.6691 | 410.921  | 312.72  | 330.472 | 0.5062016   | 0.032966 | 0.117031 | Ssscal        |
| 748.8107 | 795.9922 | 291.872 | 60.9727 | 2.128371244 | 0.032984 | 0.117069 | Gucyl1a3      |
| 309.4946 | 325.3496 | 225.854 | 213.404 | 0.530557898 | 0.033026 | 0.117193 | Lix11         |
| 338.5746 | 336.9374 | 257.126 | 191.454 | 0.586182839 | 0.033108 | 0.117457 | Zfp932        |
| 387.3875 | 270.9761 | 231.934 | 182.918 | 0.662009285 | 0.03335  | 0.118231 | Engase        |
| 3720.166 | 3367.591 | 2892.66 | 2805.96 | 0.31444471  | 0.033465 | 0.118566 | Aen           |
| 992.8752 | 967.135  | 812.204 | 615.824 | 0.454581624 | 0.033513 | 0.118685 | Gtf2h3        |
| 966.9109 | 890.4773 | 751.397 | 646.31  | 0.408431245 | 0.033542 | 0.118763 | Cetn3         |
| 1370.916 | 1227.415 | 1081.49 | 820.692 | 0.448024317 | 0.033579 | 0.118868 | Zcchc17       |
| 14588.83 | 14913.49 | 12749.4 | 10925.1 | 0.317347125 | 0.033632 | 0.118976 | Cd28          |
| 4353.696 | 3919.348 | 3345.24 | 3324.23 | 0.310691534 | 0.033665 | 0.119054 | Dnaja2        |
| 1568.244 | 1449.365 | 1248.28 | 1081.66 | 0.371885274 | 0.033685 | 0.119059 | Tfe3          |
| 331.3046 | 342.2856 | 257.994 | 181.699 | 0.610624251 | 0.033765 | 0.119318 | Wdr35         |
| 2625.511 | 2365.692 | 1952.76 | 2025.51 | 0.327251403 | 0.033856 | 0.119585 | Smc3          |
| 266.9131 | 244.235  | 184.158 | 148.773 | 0.614171256 | 0.033883 | 0.119655 | Zfp764        |
| 35.31146 | 38.32885 | 13.03   | 12.1945 | 1.543845893 | 0.033965 | 0.119865 | Gprc5b        |
| 5701.763 | 4754.56  | 4105.32 | 4147.36 | 0.341317105 | 0.033981 | 0.119897 | Acs15         |
| 608.6034 | 607.0221 | 491.666 | 354.861 | 0.518768484 | 0.034055 | 0.120133 | Pak6          |
| 17.65573 | 4.456843 | 0.86867 | 0       | 4.460498535 | 0.034065 | 1        | Rprml         |
| 84.12437 | 87.35413 | 41.696  | 46.3392 | 0.964991538 | 0.034116 | 0.120314 | Carmil3       |
| 2737.677 | 2519.008 | 2000.54 | 2185.26 | 0.328961329 | 0.034157 | 0.120411 | Rabl6         |
| 1972.249 | 1815.718 | 1561    | 1424.32 | 0.342742874 | 0.03426  | 0.120685 | Psmb7         |
| 16.61716 | 35.65475 | 7.81801 | 3.65836 | 2.16368785  | 0.034269 | 0.120685 | Mb21d2        |
| 3008.744 | 2568.924 | 2215.1  | 2179.16 | 0.343727948 | 0.034273 | 0.120685 | Map1s         |
| 972.1038 | 960.0041 | 718.388 | 775.572 | 0.371850078 | 0.034287 | 0.120685 | Hadh          |
| 51.92862 | 47.24254 | 24.3227 | 9.75563 | 1.517460248 | 0.03431  | 0.120739 | Plcd4         |
| 55.04434 | 17.82737 | 11.2927 | 7.31672 | 1.95256179  | 0.034342 | 0.120825 | Alpl          |
| 8196.414 | 7469.669 | 6118.03 | 6576.51 | 0.303518211 | 0.034373 | 0.12091  | Nap111        |
| 1438.423 | 1350.424 | 995.493 | 1157.26 | 0.374487255 | 0.034412 | 0.121008 | Ptprv         |
| 563.9448 | 481.3391 | 325.75  | 408.517 | 0.511658108 | 0.034416 | 0.121008 | Fntb          |
| 1741.686 | 1679.339 | 1410.72 | 1298.72 | 0.335710806 | 0.034448 | 0.121068 | Tcea1         |
| 1922.398 | 1787.194 | 1510.61 | 1437.74 | 0.330817447 | 0.034596 | 0.121534 | Arfgef2       |
| 11.4243  | 3.565475 | 0       | 0       | 5.303444638 | 0.034651 | 1        | Hs6st3        |
| 104.8958 | 106.9642 | 66.0187 | 43.9003 | 0.93757103  | 0.034729 | 0.121976 | 5033430I15Rik |
| 3146.874 | 2741.85  | 2309.79 | 2366.96 | 0.332351195 | 0.034762 | 0.122038 | Trim27        |

|          |          |         |         |             |          |          |           |
|----------|----------|---------|---------|-------------|----------|----------|-----------|
| 1496.583 | 1411.037 | 1178.78 | 1114.58 | 0.341716903 | 0.034881 | 0.122377 | Sap30bp   |
| 1155.931 | 1115.102 | 951.191 | 526.804 | 0.617298344 | 0.034898 | 0.12241  | Tubb2a    |
| 221.2159 | 216.6026 | 147.673 | 139.018 | 0.60942326  | 0.034974 | 0.122622 | Vsig10    |
| 272.106  | 256.7142 | 170.259 | 186.576 | 0.56897352  | 0.034996 | 0.122646 | Lpar5     |
| 1569.283 | 1445.8   | 1193.55 | 1188.97 | 0.339445555 | 0.035124 | 0.123015 | Kansl2    |
| 523.4405 | 449.2498 | 337.912 | 362.178 | 0.474751315 | 0.035159 | 0.12311  | Cwfl19l1  |
| 3477.14  | 3367.591 | 2872.68 | 2673.04 | 0.303239885 | 0.035301 | 0.123473 | Phrf1     |
| 17086.59 | 19118.08 | 15533.5 | 13068.9 | 0.339944464 | 0.03533  | 0.123548 | Mknk2     |
| 2693.018 | 2368.367 | 2094.36 | 1876.74 | 0.349265838 | 0.035355 | 0.123569 | Rbm8a     |
| 21242.96 | 19421.14 | 17677.4 | 13470.1 | 0.384489642 | 0.035489 | 0.123942 | Cd6       |
| 31.15717 | 13.37053 | 6.08067 | 1.21945 | 2.552566556 | 0.035501 | 0.123959 | Ncam1     |
| 1300.293 | 1185.52  | 965.09  | 979.221 | 0.354303822 | 0.035557 | 0.124081 | Plrg1     |
| 1278.483 | 1094.601 | 945.979 | 863.373 | 0.390104803 | 0.0357   | 0.124517 | Dera      |
| 512.0162 | 432.3138 | 324.013 | 351.203 | 0.484342024 | 0.035821 | 0.124806 | Rpusd1    |
| 52.96719 | 27.63243 | 16.5047 | 7.31672 | 1.733427821 | 0.035852 | 0.124858 | Dlk2      |
| 1041.688 | 1076.773 | 882.566 | 690.211 | 0.427843182 | 0.035988 | 0.12517  | Tmem8     |
| 799.7008 | 811.1455 | 647.157 | 576.801 | 0.394948796 | 0.036085 | 0.12548  | Abcc4     |
| 578.4848 | 512.537  | 383.951 | 415.834 | 0.448576651 | 0.036108 | 0.125512 | Eral1     |
| 1010.531 | 859.2794 | 735.761 | 670.699 | 0.40941928  | 0.036109 | 0.125512 | Mrps12    |
| 578.4848 | 483.1218 | 410.88  | 337.789 | 0.50082686  | 0.03613  | 0.125554 | Eef1akmt1 |
| 1802.962 | 1504.63  | 1132.74 | 1359.69 | 0.408911787 | 0.036182 | 0.125708 | Tank      |
| 313.6489 | 246.9091 | 196.319 | 170.723 | 0.607459336 | 0.036223 | 0.125823 | Abhd10    |
| 469.4347 | 429.6397 | 343.992 | 298.766 | 0.481614254 | 0.036241 | 0.125861 | Bcl6      |
| 5945.827 | 5502.419 | 4568.32 | 4772.94 | 0.293485973 | 0.036345 | 0.126084 | Supt5     |
| 25.96431 | 30.30653 | 7.81801 | 8.53617 | 1.787100546 | 0.036585 | 0.126755 | Kcna2     |
| 92.43295 | 64.17854 | 40.8274 | 32.9252 | 1.07900933  | 0.036594 | 0.126758 | Ntn1      |
| 57.12148 | 59.7217  | 29.5347 | 20.7307 | 1.207115449 | 0.036691 | 0.126965 | MacroD2   |
| 1317.948 | 1090.144 | 897.334 | 935.321 | 0.393794189 | 0.036693 | 0.126965 | Rnaseh2c  |
| 1631.597 | 1706.971 | 1404.64 | 1182.87 | 0.366643488 | 0.036762 | 0.127178 | Tarbp2    |
| 3836.487 | 3277.563 | 3007.33 | 2429.15 | 0.38725948  | 0.036803 | 0.127293 | Phc2      |
| 1720.914 | 1879.005 | 1517.56 | 1237.75 | 0.384777891 | 0.036883 | 0.127487 | Pofut1    |
| 4988.263 | 4847.263 | 4167    | 3862.01 | 0.292495371 | 0.037037 | 0.127989 | Vav1      |
| 313.6489 | 284.3466 | 218.036 | 189.015 | 0.551842135 | 0.037156 | 0.128348 | Zfp770    |
| 482.9362 | 456.3808 | 356.154 | 329.252 | 0.453120612 | 0.037298 | 0.128727 | Timm9     |
| 407.1204 | 374.3748 | 304.902 | 221.94  | 0.564365057 | 0.037517 | 0.12926  | Pusl1     |
| 2060.528 | 1850.481 | 1589.66 | 1513.34 | 0.333315355 | 0.03762  | 0.129479 | Usp39     |
| 22.84859 | 26.74106 | 6.94934 | 6.09727 | 1.921977328 | 0.03764  | 0.129498 | Gm11592   |
| 1484.12  | 1667.751 | 1338.62 | 769.475 | 0.578647887 | 0.037676 | 0.129589 | Phf11b    |
| 44.65861 | 35.65475 | 16.5047 | 12.1945 | 1.473413433 | 0.037765 | 0.129801 | Slc17a7   |
| 3444.945 | 3269.54  | 2860.52 | 2495    | 0.32563551  | 0.037837 | 0.129975 | Hprt      |
| 5126.393 | 4697.513 | 4004.56 | 4010.78 | 0.293439545 | 0.037862 | 0.130033 | Zc3h4     |
| 1355.337 | 1419.059 | 1168.36 | 538.998 | 0.698445989 | 0.037884 | 0.130081 | Gstt3     |
| 1335.604 | 1309.421 | 1070.2  | 1026.78 | 0.334509258 | 0.037999 | 0.130394 | Prpf38a   |
| 106.973  | 98.05055 | 65.1501 | 26.828  | 1.141248145 | 0.038024 | 0.13045  | Ubtd2     |
| 4586.336 | 4291.94  | 3703.13 | 3543.73 | 0.292680005 | 0.038036 | 0.13045  | Chtop     |

|          |          |         |         |             |          |          |               |
|----------|----------|---------|---------|-------------|----------|----------|---------------|
| 10799.08 | 10494.08 | 9250.44 | 7784.99 | 0.321618228 | 0.038056 | 0.130478 | Caprin1       |
| 545.2505 | 489.3614 | 393.506 | 364.617 | 0.446962269 | 0.03807  | 0.130497 | Dock6         |
| 325.0732 | 427.857  | 286.66  | 114.629 | 0.90248122  | 0.0381   | 0.130572 | Ptprk         |
| 642.8763 | 583.8465 | 485.585 | 415.834 | 0.442202342 | 0.038173 | 0.130766 | Mrpl27        |
| 1673.14  | 1509.979 | 1304.74 | 1192.63 | 0.34912026  | 0.038191 | 0.130802 | Ppp1r2        |
| 539.0191 | 403.79   | 308.377 | 343.886 | 0.5317835   | 0.038283 | 0.131061 | Chek2         |
| 284.5688 | 257.6055 | 154.623 | 202.429 | 0.606634315 | 0.038349 | 0.131203 | Snai3         |
| 2122.842 | 2100.065 | 1744.28 | 1665.77 | 0.308095592 | 0.038369 | 0.131245 | Setdb1        |
| 1470.619 | 1275.549 | 1048.48 | 1088.97 | 0.361451009 | 0.038461 | 0.131529 | Gm10052       |
| 2167.501 | 2044.8   | 1763.4  | 1588.95 | 0.32867307  | 0.038494 | 0.131615 | Gps1          |
| 1505.93  | 1276.44  | 1080.62 | 1074.34 | 0.368190541 | 0.038613 | 0.131995 | Zw10          |
| 131.8987 | 118.552  | 80.7861 | 59.7532 | 0.826267339 | 0.038625 | 0.131999 | Ttc32         |
| 34.27289 | 8.022318 | 3.47467 | 3.65836 | 2.564944409 | 0.038732 | 0.132262 | Ighv1-64      |
| 226.4088 | 221.9508 | 145.936 | 152.432 | 0.588355289 | 0.038829 | 0.132536 | Fancl         |
| 1352.221 | 1241.677 | 1074.54 | 925.565 | 0.373634239 | 0.03886  | 0.132603 | Nip7          |
| 263.7974 | 238.8868 | 187.632 | 126.823 | 0.670424599 | 0.038865 | 0.132603 | 9230114K14Rik |
| 116.3201 | 107.8556 | 59.9381 | 67.0699 | 0.822015438 | 0.038941 | 0.132807 | Rtl10         |
| 6438.11  | 6061.307 | 5313.64 | 4882.69 | 0.293542492 | 0.038963 | 0.132826 | Rnf10         |
| 109.0501 | 81.11455 | 46.908  | 52.4365 | 0.937699294 | 0.038987 | 0.13288  | Gm11998       |
| 11.4243  | 8.022318 | 0.86867 | 0       | 4.277171627 | 0.039045 | 1        | Cyp4a12a      |
| 100.7415 | 64.17854 | 34.7467 | 43.9003 | 1.071453071 | 0.039093 | 0.133166 | Chd3os        |
| 39.46575 | 22.28422 | 9.55534 | 8.53617 | 1.764039698 | 0.039138 | 0.133231 | Nanp          |
| 129.8216 | 147.9672 | 94.6848 | 41.4614 | 1.017417392 | 0.039155 | 0.133231 | Ninl          |
| 2589.161 | 2245.358 | 1969.27 | 1856.01 | 0.337260155 | 0.03916  | 0.133231 | Rfc1          |
| 418.5447 | 385.0713 | 303.165 | 270.719 | 0.48347958  | 0.039165 | 0.133231 | Coq10b        |
| 2678.478 | 2521.682 | 1934.52 | 2204.77 | 0.329717202 | 0.039186 | 0.133276 | Rere          |
| 4664.229 | 4191.215 | 3826.48 | 2896.2  | 0.396872053 | 0.039214 | 0.133343 | Ywhab         |
| 12.46287 | 7.130949 | 0.86867 | 0       | 4.28741368  | 0.039259 | 1        | S100a5        |
| 1593.17  | 1553.656 | 1329.93 | 1104.82 | 0.368827852 | 0.039314 | 0.133598 | Arhgap21      |
| 372.8475 | 300.3912 | 255.388 | 180.479 | 0.621999796 | 0.03942  | 0.133875 | Dennd2c       |
| 4166.753 | 4533.501 | 3726.58 | 3177.9  | 0.33314587  | 0.039607 | 0.134423 | Cyld          |
| 1110.234 | 1016.16  | 875.617 | 745.086 | 0.39009314  | 0.039674 | 0.134562 | Mis12         |
| 151.6316 | 97.15918 | 65.1501 | 69.5088 | 0.884732698 | 0.039698 | 0.134562 | Gm11223       |
| 155.7859 | 123.0089 | 92.0788 | 63.4116 | 0.833957633 | 0.039763 | 0.134727 | Cd79a         |
| 620.0277 | 549.0831 | 417.829 | 449.978 | 0.430440367 | 0.039763 | 0.134727 | Dph2          |
| 303.2631 | 278.9984 | 220.642 | 160.968 | 0.604351426 | 0.039809 | 0.134855 | Cnyll1        |
| 1832.042 | 1374.49  | 1258.7  | 1115.8  | 0.432344289 | 0.039887 | 0.135049 | Rpia          |
| 680.2649 | 584.7378 | 456.05  | 484.123 | 0.428281428 | 0.039955 | 0.135231 | Mical3        |
| 871.3623 | 793.3181 | 628.047 | 651.188 | 0.380024152 | 0.039962 | 0.135231 | Nedd1         |
| 833.9737 | 756.772  | 651.501 | 519.487 | 0.439499799 | 0.040088 | 0.135515 | Zfp628        |
| 229.5245 | 169.36   | 141.593 | 82.9228 | 0.820689427 | 0.040214 | 0.135856 | Reep2         |
| 2947.469 | 3075.222 | 2588.63 | 2151.12 | 0.344932208 | 0.040251 | 0.135951 | Skp1a         |
| 1323.141 | 1247.025 | 1047.61 | 979.221 | 0.34182467  | 0.040373 | 0.13625  | Mon1b         |
| 147.4773 | 196.9925 | 79.9174 | 119.506 | 0.796560133 | 0.040404 | 0.136326 | Myo1h         |
| 6.231435 | 13.37053 | 0.86867 | 0       | 4.2941428   | 0.040453 | 1        | Igkv8-28      |

|          |          |         |         |             |          |          |            |
|----------|----------|---------|---------|-------------|----------|----------|------------|
| 6034.106 | 4961.358 | 4611.76 | 3907.13 | 0.367733423 | 0.04053  | 0.136666 | Ptpa       |
| 851.6294 | 782.6217 | 660.187 | 578.021 | 0.398602139 | 0.040548 | 0.136697 | Fam234a    |
| 1024.032 | 1062.511 | 849.557 | 778.011 | 0.357606779 | 0.040649 | 0.136971 | Pwp1       |
| 105.9344 | 103.3988 | 62.5441 | 53.6559 | 0.845187435 | 0.040655 | 0.136971 | Prx        |
| 699.9978 | 646.2423 | 523.806 | 496.317 | 0.39912127  | 0.040676 | 0.136995 | Naa16      |
| 436.2004 | 324.4582 | 286.66  | 208.527 | 0.614675412 | 0.040734 | 0.137065 | Uchl3      |
| 2430.259 | 2213.268 | 1941.47 | 1754.79 | 0.328424805 | 0.040825 | 0.137287 | Xpo7       |
| 2115.572 | 1858.504 | 1653.94 | 1451.15 | 0.35501272  | 0.040844 | 0.137308 | Trim11     |
| 5854.433 | 5072.779 | 4625.65 | 4016.88 | 0.337979547 | 0.040909 | 0.137407 | Abcf1      |
| 4942.566 | 4604.811 | 3829.09 | 3992.49 | 0.287703465 | 0.040912 | 0.137407 | Dcaf7      |
| 377.0018 | 369.918  | 246.702 | 285.352 | 0.491714062 | 0.040939 | 0.137455 | Macrodl    |
| 19.73288 | 16.04464 | 4.34334 | 2.43891 | 2.371659644 | 0.040943 | 0.137455 | Peg3       |
| 6537.813 | 5859.858 | 5022.64 | 5093.66 | 0.293328953 | 0.041023 | 0.137635 | Rrp1       |
| 933.6766 | 779.0562 | 705.358 | 509.731 | 0.492461044 | 0.041057 | 0.137695 | Polr2l     |
| 840.2051 | 697.9417 | 582.876 | 569.485 | 0.415697337 | 0.04116  | 0.138009 | Ubqln2     |
| 563.9448 | 537.4953 | 437.808 | 370.714 | 0.443582635 | 0.041297 | 0.138411 | Psmg4      |
| 785.1607 | 679.2229 | 522.069 | 576.801 | 0.414874857 | 0.041325 | 0.138449 | Mmgt1      |
| 3035.747 | 2769.482 | 2470.49 | 2114.53 | 0.339657803 | 0.04137  | 0.138572 | Pip5k1c    |
| 3351.473 | 3081.461 | 2616.43 | 2618.17 | 0.297266302 | 0.041383 | 0.138583 | Ints3      |
| 930.5609 | 820.9505 | 687.985 | 653.627 | 0.383620046 | 0.041391 | 0.138584 | Dxo        |
| 1519.431 | 1342.401 | 1149.25 | 1098.73 | 0.347622515 | 0.04141  | 0.138588 | Cnot11     |
| 49.85148 | 17.82737 | 10.424  | 0       | 2.645200803 | 0.0416   | 0.139111 | Gbp2b      |
| 2923.581 | 2867.533 | 2428.79 | 2296.23 | 0.293183192 | 0.041734 | 0.139472 | Rsl1d1     |
| 930.5609 | 890.4773 | 734.893 | 676.797 | 0.366235882 | 0.041768 | 0.139557 | Rmdn3      |
| 179.673  | 158.6636 | 98.1594 | 113.409 | 0.679681889 | 0.04182  | 0.139615 | Ftx        |
| 1551.627 | 1449.365 | 1262.17 | 1068.24 | 0.363526596 | 0.041855 | 0.139674 | Ash2l      |
| 2.077145 | 70.41812 | 0       | 0       | 7.581304355 | 0.041896 | 0.139754 | Ighv1-72   |
| 1035.457 | 1070.534 | 885.172 | 691.43  | 0.415822917 | 0.041897 | 0.139754 | Mphosph6   |
| 7481.876 | 7301.201 | 6378.63 | 5698.51 | 0.29141217  | 0.041971 | 0.139945 | Rbck1      |
| 4972.685 | 4647.596 | 4216.51 | 2781.57 | 0.458482544 | 0.042029 | 0.14011  | Rgs1       |
| 31.15717 | 24.06695 | 9.55534 | 6.09727 | 1.800908484 | 0.042045 | 0.140131 | Aoc3       |
| 174.4802 | 153.3154 | 105.977 | 19.5113 | 1.372816764 | 0.042072 | 0.140183 | Plagl1     |
| 6.231435 | 7.130949 | 0       | 0       | 5.141703474 | 0.04222  | 1        | Cygb       |
| 55.04434 | 89.13687 | 39.9587 | 10.9751 | 1.482077497 | 0.042233 | 0.140614 | Pard3b     |
| 3367.052 | 2630.429 | 1712.14 | 2549.88 | 0.493485786 | 0.042291 | 0.140748 | Lbh        |
| 8327.274 | 7646.16  | 6326.51 | 6764.31 | 0.287194816 | 0.042368 | 0.140971 | Ddx39b     |
| 762.3122 | 741.6187 | 622.835 | 476.806 | 0.4490636   | 0.042375 | 0.140971 | Hikeshi    |
| 17.65573 | 21.39285 | 1.73733 | 6.09727 | 2.367517775 | 0.04242  | 0.14105  | Amph       |
| 2258.895 | 2055.496 | 1733.86 | 1738.94 | 0.312871148 | 0.042423 | 0.14105  | Ampd2      |
| 1054.151 | 1101.732 | 832.183 | 867.031 | 0.344006895 | 0.042432 | 0.14105  | Mbtd1      |
| 535.9034 | 412.7037 | 370.052 | 264.621 | 0.575671062 | 0.042434 | 0.14105  | Timm8a1    |
| 50.89005 | 36.54612 | 20.848  | 8.53617 | 1.548452142 | 0.042451 | 0.141076 | AC139323.1 |
| 1267.058 | 1033.096 | 868.667 | 886.543 | 0.389716502 | 0.04269  | 0.141785 | Paip2b     |
| 179.673  | 172.0342 | 126.825 | 54.8754 | 0.942468848 | 0.042699 | 0.141785 | Kbtbd8     |
| 141.2458 | 221.9508 | 77.3114 | 124.384 | 0.856788846 | 0.04277  | 0.141906 | Bace2      |

|          |          |         |         |             |          |          |          |
|----------|----------|---------|---------|-------------|----------|----------|----------|
| 1029.225 | 945.7422 | 772.245 | 770.694 | 0.355814174 | 0.042771 | 0.141906 | Gps2     |
| 1607.71  | 1484.129 | 1183.13 | 1273.11 | 0.332381482 | 0.042783 | 0.141906 | Tomm34   |
| 1408.304 | 1231.871 | 1031.98 | 1037.75 | 0.350860189 | 0.042788 | 0.141906 | Eif2b4   |
| 2613.048 | 2654.496 | 2195.12 | 2107.22 | 0.291801985 | 0.042833 | 0.142024 | Eps15    |
| 389.4647 | 334.2632 | 271.893 | 232.916 | 0.516564158 | 0.042842 | 0.142026 | Palb2    |
| 617.9506 | 592.7602 | 428.253 | 481.684 | 0.413434872 | 0.042855 | 0.142038 | Zgrf1    |
| 3171.8   | 2812.268 | 2250.72 | 2515.73 | 0.328506718 | 0.04296  | 0.142328 | Odf2     |
| 4720.312 | 4121.689 | 3726.58 | 3324.23 | 0.326124971 | 0.042972 | 0.142341 | Metap2   |
| 16.61716 | 10.69642 | 2.606   | 0       | 3.27965541  | 0.042996 | 0.142362 | Ighv1-53 |
| 1112.311 | 1036.662 | 823.497 | 864.592 | 0.348514748 | 0.043198 | 0.14294  | Srsf4    |
| 6287.517 | 6832.341 | 5244.15 | 5527.78 | 0.284675843 | 0.043226 | 0.143006 | Mycbp2   |
| 270.0288 | 254.9314 | 198.925 | 140.237 | 0.624523589 | 0.043269 | 0.143119 | Fam109a  |
| 5794.196 | 5284.925 | 4549.21 | 4544.9  | 0.284742923 | 0.043427 | 0.143552 | Brd4     |
| 976.2581 | 850.3657 | 762.69  | 540.218 | 0.484786273 | 0.043467 | 0.143625 | Cpox     |
| 382.1947 | 297.7171 | 246.702 | 215.843 | 0.552673034 | 0.043506 | 0.143694 | Anapc15  |
| 4398.354 | 3655.503 | 3419.08 | 2755.96 | 0.382581992 | 0.04358  | 0.14385  | Cenpb    |
| 1200.59  | 1111.537 | 929.474 | 892.64  | 0.342949152 | 0.043601 | 0.143874 | Thoc5    |
| 3594.499 | 4039.683 | 3279.22 | 2691.33 | 0.354157024 | 0.043616 | 0.143881 | Itpr1    |
| 391.5418 | 402.0073 | 312.72  | 241.452 | 0.514435859 | 0.043693 | 0.144019 | Luzp1    |
| 87.24008 | 82.89729 | 52.9887 | 23.1696 | 1.143671945 | 0.043858 | 0.144472 | 10-Sep   |
| 2201.774 | 2160.678 | 1862.42 | 1604.8  | 0.330489451 | 0.043957 | 0.144652 | Drg1     |
| 2454.147 | 2210.594 | 1757.31 | 1958.44 | 0.328527505 | 0.044013 | 0.144784 | Sfswap   |
| 76.85436 | 98.05055 | 52.9887 | 32.9252 | 1.016326276 | 0.044042 | 0.144784 | Clec2l   |
| 2764.68  | 2434.328 | 2052.66 | 2120.63 | 0.316996563 | 0.044107 | 0.144937 | Twf2     |
| 547.3277 | 434.9879 | 357.891 | 347.544 | 0.476352794 | 0.04418  | 0.145119 | Apex2    |
| 1.038572 | 203.2321 | 0       | 0       | 9.075349182 | 0.044267 | 0.14529  | Igkv3-1  |
| 30.1186  | 20.50148 | 7.81801 | 0       | 2.62869183  | 0.044338 | 0.145431 | Iqcf3    |
| 389.4647 | 160.4464 | 118.139 | 169.504 | 0.936314903 | 0.044396 | 0.145592 | Etv4     |
| 1449.847 | 1418.168 | 1199.63 | 1071.9  | 0.335401155 | 0.044591 | 0.146156 | Nop14    |
| 995.9909 | 804.9059 | 708.833 | 637.774 | 0.417835818 | 0.044595 | 0.146156 | Med9     |
| 3739.899 | 3337.284 | 2918.72 | 2818.16 | 0.302610726 | 0.044617 | 0.14619  | Snx3     |
| 10083.5  | 8503.657 | 8026.49 | 6239.94 | 0.381369376 | 0.044624 | 0.14619  | Calm3    |
| 3186.34  | 3441.574 | 2800.58 | 2574.27 | 0.302081617 | 0.044676 | 0.146332 | Msi2     |
| 69.58435 | 141.7276 | 59.0694 | 40.242  | 1.085331112 | 0.044702 | 0.146355 | Pkhd11l  |
| 2436.491 | 2234.661 | 2008.36 | 1599.92 | 0.371386657 | 0.044721 | 0.146388 | Psm6     |
| 493.3219 | 384.1799 | 334.437 | 271.938 | 0.529759709 | 0.044792 | 0.146564 | Cox11    |
| 825.6651 | 790.644  | 641.945 | 612.166 | 0.365264966 | 0.04494  | 0.146963 | Ing5     |
| 4051.471 | 3710.768 | 3260.98 | 3062.05 | 0.295502    | 0.044978 | 0.146963 | Api5     |
| 3053.403 | 2707.978 | 2366.25 | 2279.16 | 0.310239382 | 0.044987 | 0.146963 | Samm50   |
| 1010.531 | 942.1767 | 800.911 | 709.722 | 0.368859054 | 0.045025 | 0.147025 | Ldah     |
| 882.7866 | 795.9922 | 644.551 | 653.627 | 0.370683611 | 0.045168 | 0.147435 | Tdp2     |
| 39.46575 | 35.65475 | 17.3733 | 6.09727 | 1.649694345 | 0.045236 | 0.147606 | Rnf223   |
| 20286.44 | 17766.76 | 16110.3 | 14842   | 0.297874318 | 0.045239 | 0.147606 | Atp5a1   |
| 2252.664 | 2105.413 | 1856.34 | 1596.26 | 0.335068013 | 0.045358 | 0.147903 | Rars     |
| 1213.053 | 1103.514 | 972.908 | 785.328 | 0.396015287 | 0.045497 | 0.148267 | Rsl24d1  |

|          |          |         |         |             |          |          |               |
|----------|----------|---------|---------|-------------|----------|----------|---------------|
| 3290.197 | 3298.064 | 2695.48 | 2740.11 | 0.277548327 | 0.045506 | 0.148267 | Zswim4        |
| 3843.757 | 3274.888 | 2784.08 | 2912.05 | 0.321586884 | 0.045517 | 0.148274 | Uqrc1         |
| 741.5407 | 722.9    | 575.058 | 557.29  | 0.370500716 | 0.045646 | 0.1486   | Lrrc40        |
| 18356.77 | 16833.5  | 15115.7 | 13783.5 | 0.284038474 | 0.04569  | 0.148686 | Tpm3          |
| 1564.09  | 2191.876 | 1563.6  | 1012.15 | 0.543281557 | 0.045734 | 0.148758 | Batf3         |
| 247.1802 | 205.9062 | 153.754 | 146.334 | 0.592398265 | 0.045772 | 0.148833 | Gm11560       |
| 386.3489 | 311.0877 | 226.722 | 257.305 | 0.527897084 | 0.046025 | 0.149501 | Cep78         |
| 192.1359 | 126.5744 | 85.9981 | 99.9952 | 0.777759809 | 0.046041 | 0.149501 | Gm15452       |
| 4502.211 | 3837.342 | 3527.66 | 3051.07 | 0.341622139 | 0.046087 | 0.149585 | E2f4          |
| 25.96431 | 30.30653 | 7.81801 | 9.75563 | 1.68818827  | 0.046279 | 0.150027 | Rasl11a       |
| 1929.668 | 1752.431 | 1542.75 | 1377.98 | 0.333266478 | 0.046302 | 0.150073 | Eif2b5        |
| 2161.269 | 1914.66  | 1637.44 | 1630.41 | 0.318503105 | 0.046463 | 0.15038  | Zfp865        |
| 48.8129  | 64.17854 | 30.4034 | 15.8529 | 1.273813351 | 0.046472 | 0.15038  | Tmod2         |
| 28.04146 | 22.28422 | 8.68667 | 4.87781 | 1.868820416 | 0.046474 | 0.15038  | Jam3          |
| 480.859  | 381.5058 | 316.195 | 296.327 | 0.491651445 | 0.046488 | 0.15038  | Thoc6         |
| 510.9776 | 419.8346 | 349.204 | 321.936 | 0.469903516 | 0.046517 | 0.150436 | 2410004B18Rik |
| 425.8147 | 290.5862 | 260.6   | 206.088 | 0.614359908 | 0.046712 | 0.151007 | Gfra1         |
| 226.4088 | 207.6889 | 163.309 | 73.1672 | 0.867445426 | 0.04673  | 0.15102  | Kcnc3         |
| 778.9293 | 612.3703 | 462.131 | 548.754 | 0.461735862 | 0.046744 | 0.15102  | D1Ertd622e    |
| 82.04722 | 57.93896 | 32.1407 | 35.3641 | 1.052648879 | 0.046941 | 0.151596 | Gm9774        |
| 33.23432 | 24.95832 | 8.68667 | 9.75563 | 1.660302637 | 0.04704  | 0.151847 | Platr14       |
| 524.4791 | 483.1218 | 365.709 | 386.567 | 0.422027076 | 0.047093 | 0.151966 | Dctd          |
| 1001.184 | 982.2883 | 842.607 | 615.824 | 0.441321925 | 0.047145 | 0.152054 | Gm4737        |
| 889.018  | 771.0339 | 589.825 | 670.699 | 0.398044277 | 0.047256 | 0.152247 | Psmg2         |
| 6872.234 | 5860.749 | 5365.76 | 4825.38 | 0.320941083 | 0.047346 | 0.152461 | Lrmp          |
| 1563.051 | 1344.184 | 1122.32 | 1164.58 | 0.34615482  | 0.047346 | 0.152461 | Fh1           |
| 160.9787 | 308.4136 | 138.987 | 132.92  | 0.789054982 | 0.047365 | 0.152461 | Kif1a         |
| 287.6846 | 243.3436 | 191.976 | 167.065 | 0.561284105 | 0.04737  | 0.152461 | Jade3         |
| 2675.363 | 2063.518 | 1924.1  | 1684.06 | 0.39248008  | 0.047472 | 0.152668 | Ccdc124       |
| 721.8078 | 705.0726 | 471.686 | 592.654 | 0.425239763 | 0.04749  | 0.152696 | Telo2         |
| 7466.297 | 6841.255 | 5946.9  | 5883.86 | 0.274138611 | 0.047598 | 0.153012 | Ppp1cc        |
| 25.96431 | 16.936   | 6.94934 | 1.21945 | 2.337646216 | 0.047654 | 0.153157 | Tmem255a      |
| 84.12437 | 75.76634 | 45.1707 | 37.8031 | 0.940993453 | 0.047665 | 0.153157 | Pecr          |
| 729.0778 | 727.3568 | 590.694 | 525.584 | 0.382281951 | 0.047672 | 0.153157 | Prpsap2       |
| 695.8435 | 681.897  | 579.401 | 358.519 | 0.55136247  | 0.047709 | 0.153247 | Meis3         |
| 347.9218 | 459.0549 | 311.852 | 228.038 | 0.577281323 | 0.047842 | 0.153583 | Mast4         |
| 2486.342 | 2275.664 | 2050.06 | 1668.21 | 0.355918136 | 0.047915 | 0.153787 | Cpsf2         |
| 1640.944 | 1468.976 | 1289.97 | 1167.02 | 0.338992821 | 0.047945 | 0.153852 | Pmm2          |
| 6.231435 | 22.28422 | 2.606   | 0       | 3.354599106 | 0.047994 | 0.153962 | Faxc          |
| 1122.697 | 1070.534 | 917.313 | 785.328 | 0.363739916 | 0.048004 | 0.153962 | Sh3bp5l       |
| 1571.36  | 1372.708 | 1258.7  | 914.59  | 0.436156774 | 0.048028 | 0.153995 | Galnt7        |
| 58.16006 | 57.04759 | 31.272  | 19.5113 | 1.169062959 | 0.048152 | 0.154281 | Adgrd1        |
| 27.00288 | 27.63243 | 10.424  | 1.21945 | 2.180560309 | 0.04816  | 0.154281 | Myrf1         |
| 1924.475 | 1641.01  | 1500.19 | 1243.84 | 0.376548562 | 0.048247 | 0.154484 | Hbs1l         |
| 42.58147 | 37.43748 | 17.3733 | 13.414  | 1.368901797 | 0.048357 | 0.154752 | Crocc2        |

|          |          |         |         |             |          |          |         |
|----------|----------|---------|---------|-------------|----------|----------|---------|
| 25.96431 | 4.456843 | 2.606   | 0       | 3.443687391 | 0.04836  | 0.154752 | Nkx1-1  |
| 2445.838 | 2245.358 | 1984.91 | 1779.18 | 0.316908537 | 0.048377 | 0.154776 | Timm13  |
| 438.2776 | 385.0713 | 321.407 | 263.402 | 0.490134265 | 0.048419 | 0.15488  | Orc1    |
| 54.00577 | 79.33181 | 38.2214 | 15.8529 | 1.286042786 | 0.048481 | 0.154986 | Fam135a |
| 946.1395 | 1250.59  | 898.202 | 680.455 | 0.47557399  | 0.048513 | 0.155027 | Ncoa7   |
| 1683.526 | 1471.65  | 1288.23 | 1207.26 | 0.337608078 | 0.048553 | 0.155123 | Ints5   |
| 3018.091 | 3003.912 | 2634.67 | 2043.8  | 0.363367303 | 0.048605 | 0.155205 | Fam53b  |
| 1989.905 | 1818.392 | 1566.21 | 1503.59 | 0.310511633 | 0.048607 | 0.155205 | Cers5   |
| 1466.464 | 1309.421 | 1056.3  | 1138.97 | 0.338848467 | 0.048687 | 0.155396 | Strbp   |
| 7.270007 | 10.69642 | 0.86867 | 0       | 4.167476056 | 0.04869  | 1        | Gm14145 |
| 4585.297 | 3765.141 | 3458.17 | 3138.87 | 0.339598141 | 0.048711 | 0.155425 | Sh3kbp1 |
| 2697.173 | 2688.368 | 2055.27 | 2310.86 | 0.303323332 | 0.048727 | 0.155425 | Helz    |
| 1323.141 | 1145.409 | 1024.16 | 873.129 | 0.378184452 | 0.048779 | 0.155538 | Pura    |
| 1282.637 | 1142.735 | 1013.73 | 854.837 | 0.374665032 | 0.048844 | 0.155684 | Tti1    |
| 59.19863 | 88.2455  | 42.5647 | 24.3891 | 1.12868468  | 0.048904 | 0.155816 | Abca5   |
| 82.04722 | 85.57139 | 42.5647 | 47.5587 | 0.898434414 | 0.049022 | 0.156096 | Gm37198 |
| 1030.264 | 921.6752 | 789.619 | 728.014 | 0.361885416 | 0.049042 | 0.156108 | Pfdn2   |
| 4032.777 | 3904.195 | 3221.89 | 3348.62 | 0.27269718  | 0.049045 | 0.156108 | Rdx     |
| 149.5544 | 155.9895 | 105.977 | 80.4839 | 0.707027631 | 0.049112 | 0.15629  | Rnf144b |
| 663.6478 | 564.2364 | 434.334 | 481.684 | 0.423351836 | 0.049123 | 0.156295 | Crocc   |
| 872.4008 | 755.8806 | 655.844 | 581.679 | 0.394153775 | 0.049321 | 0.156801 | Nudcd1  |
| 1494.506 | 1367.36  | 1149.25 | 1141.41 | 0.32087714  | 0.04949  | 0.157209 | Yeats2  |
| 1046.881 | 986.7451 | 695.803 | 858.495 | 0.389415356 | 0.049498 | 0.157209 | Unk     |
| 3278.773 | 3533.385 | 2195.99 | 2993.76 | 0.393283293 | 0.049605 | 0.157423 | Rasgrp1 |
| 705.1907 | 599.8911 | 484.716 | 499.976 | 0.406127834 | 0.049718 | 0.15774  | Cenpl   |
| 627.2977 | 699.7244 | 509.039 | 506.073 | 0.386950945 | 0.049777 | 0.157846 | Phlpp2  |



**Supplemental Table 3. Common genes generated by RNA-Seq and ChIP-Seq data**

| <b>161 common gene in "Differentially expressed genes" and "Genes with E4BP4 enrichment in promoter region"</b> |
|-----------------------------------------------------------------------------------------------------------------|
| Ighm                                                                                                            |
| Hivep3                                                                                                          |
| Tal1                                                                                                            |
| Tex2                                                                                                            |
| Ccna2                                                                                                           |
| Snap23                                                                                                          |
| Abcb9                                                                                                           |
| Tnfrsf9                                                                                                         |
| Wipi1                                                                                                           |
| Ugcg                                                                                                            |
| Ncapg2                                                                                                          |
| Msmo1                                                                                                           |
| Nabp1                                                                                                           |
| Rcc1                                                                                                            |
| Mbnl1                                                                                                           |
| Nbeal1                                                                                                          |
| Mapre2                                                                                                          |
| Oasl1                                                                                                           |
| Spr                                                                                                             |
| Ksr1                                                                                                            |
| Hspd1                                                                                                           |
| Mob3c                                                                                                           |
| Mxi1                                                                                                            |
| Wdhd1                                                                                                           |
| Figl1                                                                                                           |
| Ahi1                                                                                                            |
| Txlna                                                                                                           |
| Hmgn2                                                                                                           |
| Gen1                                                                                                            |
| Irf2bp1                                                                                                         |
| Fam214b                                                                                                         |
| Pcbp3                                                                                                           |
| Cdk17                                                                                                           |

|          |
|----------|
| Cdk4     |
| Diaph1   |
| Tubg1    |
| Ptma     |
| Ilf3     |
| Tnfaip3  |
| Paxbp1   |
| Plxnc1   |
| Tiparp   |
| Samd1    |
| Pwp2     |
| Hjurp    |
| Mfsd2a   |
| Palm3    |
| Sart3    |
| Trim59   |
| Nup188   |
| Jak2     |
| Actn4    |
| Rnps1    |
| Mindy2   |
| Gm2a     |
| Ncaph    |
| Cdc7     |
| Mettl1   |
| Lpcat1   |
| Zc3h18   |
| Pole4    |
| Slc6a6   |
| Tdg      |
| Nop2     |
| Rara     |
| Pknox1   |
| Psen2    |
| Smpd4    |
| Hnrnpd   |
| Ctbp1    |
| Hmgb1    |
| Ikkap    |
| Nampt    |
| Abhd18   |
| AW549877 |
| Ptpn1    |

|          |
|----------|
| Psmc9    |
| Serf2    |
| Ublcp1   |
| Dusp22   |
| Diablo   |
| Fau      |
| Rps24    |
| Parp6    |
| Rps15    |
| Phtf1    |
| Wdr1     |
| Rsrp1    |
| Hsp90aa1 |
| Nup107   |
| Rpl5     |
| Dazap1   |
| Polh     |
| Gtf3c1   |
| Set      |
| Mrpl49   |
| Smc6     |
| Ddit3    |
| Spag9    |
| Stx2     |
| Nfyc     |
| Xpo5     |
| Ptges3   |
| Socs1    |
| Rab33b   |
| Rad23b   |
| Brox     |
| Zcchc6   |
| Rrbp1    |
| Spen     |
| Adipor2  |
| Rps29    |
| Adam10   |
| Taf4b    |
| Hint3    |
| Mapk6    |
| Eml4     |
| Fam46c   |
| Szrd1    |
| Ldlrap1  |
| Slc35a5  |

|         |
|---------|
| Cep72   |
| Utp15   |
| Psma4   |
| Gjc1    |
| Tmem267 |
| Park7   |
| Preli3a |
| Crtc1   |
| Brd2    |
| Preli3b |
| Pds5b   |
| N6amt1  |
| Nfat5   |
| Cops3   |
| Slc11a2 |
| Ndufa13 |
| Dhd1    |
| Ep400   |
| Tmem135 |
| Ddx59   |
| Nudt6   |
| Btbd6   |
| Fam206a |
| Trim41  |
| Ciapi1  |
| Smg7    |
| Xrcc1   |
| Arfgef2 |
| Abhd10  |
| Bcl6    |
| Rffl    |
| Nip7    |
| Cmc1    |
| Naa16   |
| Usp20   |
| Snx3    |
| Azi2    |
| Il6st   |
| Shc3p11 |
| Crocc   |

**Supplemental Table 4. Sample information**

| <b>Characteristic</b>                                            | <b>SLE patient ( n=60 )</b> |
|------------------------------------------------------------------|-----------------------------|
| <b>Age, median (range), years</b>                                | 35 (20–64)                  |
| <b>Female, %</b>                                                 | 88                          |
| <b>Ethnicity, %</b>                                              |                             |
| <b>Chinese</b>                                                   | 100                         |
| <b>Glucocorticoid treatment, %</b>                               | 97                          |
| <b>Glucocorticoid dose, prednisolone, median (range), mg/day</b> | 7 (0–60)                    |
| <b>MTX, %</b>                                                    | 3                           |
| <b>HCQ, %</b>                                                    | 87                          |
| <b>AZA, %</b>                                                    | 28                          |
| <b>MMF, %</b>                                                    | 13                          |
| <b>Ciclosporin, %</b>                                            | 5                           |
| <b>SLEDAI score, median (range)</b>                              | 4 (0–16)                    |
| <b>Renal disease, %</b>                                          | 13                          |
| <b>CNS disease, %</b>                                            | 8                           |
| <b>Cutaneous disease, %</b>                                      | 8                           |
| <b>ANA positive, %</b>                                           | 100                         |
| <b>Serum creatinine, median (range), <math>\mu</math>mol/l</b>   | 52 (40–662)                 |

**Supplemental Table 5. Reagents**

| <b>Reagents</b>                                          | <b>Lot</b> | <b>Brand</b>              |
|----------------------------------------------------------|------------|---------------------------|
| Purified NA.LE Rat Anti-Mouse IL-4                       | 554385     | BD biosciences            |
| Purified NA.LE Rat Anti-Mouse IFN- $\gamma$              | 554430     | BD biosciences            |
| Purified NA.LE Hamster Anti-Mouse CD28                   | 553294     | BD biosciences            |
| Purified NA.LE Hamster Anti-Mouse CD3e                   | 553057     | BD biosciences            |
| Anti-CD3 Mouse mAb (UCHT1)                               | 217570     | Calbiochem                |
| Anti-CD28 Mouse mAb (ANC28.1.5D 10)                      | 217669     | Calbiochem                |
| Mouse IgG1                                               | A90-105P   | Bethyl laboratories       |
| Mouse IgG2a                                              | A90-107P   | Bethyl laboratories       |
| Mouse IgG2b                                              | A90-109P   | Bethyl laboratories       |
| Mouse IgG3                                               | A90-111P   | Bethyl laboratories       |
| Mouse IgM                                                | A90-101A   | Bethyl laboratories       |
| Anti-FLAG(R) M2 MAGNETIC BEADS                           | M8823      | Sigma-Aldrich             |
| Phosphoserine Antibody                                   | ICP9806    | Immunechem                |
| DYKDDDDK Tag (D6W5B) Rabbit mAb (Anti-FLAG® M2 Antibody) | 14793      | Cell signaling Technology |
| Mouse-E4BP4 (NFIL3) Monoclonal Antibody                  | 12-5927-82 | Thermo Fisher             |
| Human E4BP4 (NFIL3) Monoclonal Antibody                  | 12-9812-42 | Thermo Fisher             |
| Recombinant Murine IFN- $\gamma$                         | 315-05     | peprotech                 |
| Recombinant Murine TNF- $\alpha$                         | 315-01A    | peprotech                 |
| Recombinant Mouse IL-23 Protein                          | 1887ML     | R&D                       |
| Recombinant Mouse TGF-beta 1 Protein                     | 7666MB     | R&D                       |
| Recombinant Murine IL-1 $\beta$                          | 211-11B    | PeperoTech                |
| Recombinant Murine IL-2                                  | 212-12     | PeperoTech                |
| Recombinant Murine IL-4                                  | 214-14     | PeperoTech                |
| Recombinant Murine IL-6                                  | 216-16     | PeperoTech                |
| Recombinant Murine IL-12                                 | 210-12     | PeperoTech                |
| Recombinant Murine IL-21                                 | 210-21     | PeperoTech                |
| recombinant human IL-6                                   | 200-06     | peprotech                 |
| recombinant human IL-12                                  | 200-12     | peprotech                 |
| recombinant human IL-21                                  | 200-21     | peprotech                 |
| recombinant human TGF- $\beta$ 1                         | 100-21     | peprotech                 |
| Mouse IL-21                                              | 594-ML-010 | Thermo Fisher             |
| Mouse IL-6                                               | 406-ML-005 | Thermo Fisher             |
| Purified NA/LE Rat Anti-Mouse IFN- $\gamma$              | 554408     | BD bioscience             |
| Anti-Mouse TGF- $\beta$                                  | 16-9243-85 | Thermo Fisher             |

|                                                                  |               |                           |
|------------------------------------------------------------------|---------------|---------------------------|
| Histone H3ac (pan-acetyl)antibody (pAb)                          | 39139         | Active Motif              |
| Histone H3K27me3 antibody (pAb)                                  | 39155         | ACTIVE MOTIF              |
| HDAC1 antibody-Chip grade                                        | 40967         | ACTIVE MOTIF              |
| normal rabbit igg                                                | 2729          | Cell signaling Technology |
| Anti-KMT6 / EZH2                                                 | ab186006      | Abcam                     |
| E4BP4/NFIL3 (D5K8O) Rabbit mAb                                   | 14312S        | Cell signaling Technology |
| E4BP4 Antibody                                                   | sc-74415      | Santa cruz                |
| APC Mouse Anti-Human CD69                                        | 555533        | BD Biosciences            |
| PE Mouse Anti-Human CD154                                        | 555700        | BD Biosciences            |
| PerCP-Cy™5.5 Foxp3                                               | 563902        | BD Biosciences            |
| APC-Cy7 Mouse Anti-Bcl-6                                         | 563581        | BD biosciences            |
| FITC Rat Anti-Mouse CD4                                          | 553729        | BD biosciences            |
| PE Rat Anti-Mouse CD4                                            | 553730        | BD biosciences            |
| APC hamster anti-mouse CD279 (PD-1)                              | 562671        | BD biosciences            |
| PE Rat anti-mouse CD278 (ICOS)                                   | 552146        | BD biosciences            |
| PE Hamster Anti-Mouse CD95                                       | 554258        | BD biosciences            |
| Alexa Fluor® 647 Rat Anti-Mouse T- and B-Cell Activation Antigen | 561529        | BD biosciences            |
| FITC Anti-mouse CD4                                              | 100510        | Biolegend                 |
| FITC Rat Anti-Mouse CD4                                          | 553047        | BD biosciences            |
| PE Rat Anti-Mouse CD45RA                                         | 553989        | BD biosciences            |
| APC-Cy™7 Rat Anti-Mouse CD62L                                    | 560514        | BD biosciences            |
| PE-Cy™7 Rat Anti-Mouse CD44                                      | 560569        | BD biosciences            |
| PerCP.Cy5.5 anti-mouse CD8a                                      | 100734        | Biolegend                 |
| APC anti-mouse CD3                                               | 557869        | BD biosciences            |
| PE Streptavidin RUO                                              | 554061        | BD biosciences            |
| Biotin Rat Anti-Mouse CXCR5                                      | 551960        | BD biosciences            |
| PE Rat Anti-Mouse CD25                                           | 552880        | BD biosciences            |
| PE-Cy™7 Rat Anti-Mouse CXCR5                                     | 553075        | BD biosciences            |
| APC Mouse anti-human CD69                                        | 555533        | BD biosciences            |
| PE Mouse anti-human CD154                                        | 561720        | BD biosciences            |
| APC-Cy™7 Mouse Anti-human Bcl-6                                  | 563581        | BD biosciences            |
| Biotin Rat Anti-Human CXCR5 (CD185)                              | 552118        | BD biosciences            |
| APC Mouse Anti-Human IL-4                                        | 560671        | BD bioscience             |
| PerCP-Cy5.5 Mouse Anti-Human IFN-γ                               | 560742        | BD biosciences            |
| Alexa Fluor® 647 Mouse anti-Human FoxP3                          | 561184        | BD biosciences            |
| PE Anti-human CD278                                              | 12-9185       | Thermo Fisher             |
| Percp.Cy5.5 Anti-human CD185                                     | 313518        | Biolegend                 |
| APC Anti-human CD279                                             | 85-17-2799-42 | Thermo Fisher             |

|                                                                           |                 |                          |
|---------------------------------------------------------------------------|-----------------|--------------------------|
| PE Anti-human CD278(ICOS)                                                 | 313507          | Biolegend                |
| PE-CY7 Anti-human CD185                                                   | 356923          | Biolegend                |
| PerCP-Cy™5.5 Rat Anti-Mouse IL-17A                                        | 560666          | BD biosciences           |
| PE Mouse anti-Human IL-17A                                                | 560436          | BD biosciences           |
| Alexa Fluor® 647 Rat anti-Mouse IL-17A                                    | 560184          | BD biosciences           |
| APC Rat Anti-Mouse IL-4                                                   | 562045          | BD biosciences           |
| APC Mouse Anti-Human IL-4                                                 | 560671          | BD biosciences           |
| PerCP-Cy™5.5 Rat Anti-Mouse IFN-γ                                         | 560660          | BD biosciences           |
| Mouse IgG (total) ELISA Kit, 96 tests, Quantitative                       | 6320            | Alpha diagnostic         |
| Alexa Fluor 488-conjugated goat anti-mouse IgG                            | ab150113        | Abcam                    |
| BD biosciences Cytfix.Cytoperm™<br>Fixation.Permeabilization Solution Kit | 554714          | BD biosciences           |
| Naive CD4+ T Cell Isolation Kit, mouse                                    | 130-104-453     | Miltenyi Biotec          |
| Naive CD4+T cell Isolation Kit II Human                                   | 130-094-131     | Miltenyi Biotec          |
| Human FoxP3 Buffer Set                                                    | 560098          | BD biosciences           |
| Mouse FoxP3 Buffer Set                                                    | 560509          | BD biosciences           |
| EZ-Magna ChIP™ A/G Chromatin<br>Immunoprecipitation Kit                   | 17-10086        | Milipore                 |
| immunoprecipitation kit-dynabeads protein G                               | 10007D          | Thermo Fisher            |
| M. tuberculosis H37 Ra                                                    | 231141          | BD biosciences           |
| Freund's Adjuvant, Complete                                               | F5881-10ml      | Sigma-Aldrich            |
| Keyhole Limpet Hemocyanin (KLH)                                           | H7017           | Sigma-Aldrich            |
| Pristane                                                                  | P9622           | Sigma-Aldrich            |
| Dual-Luciferase Reporter Assay System                                     | E1910           | Promega                  |
| Opti-mem I                                                                | 31985070        | Thermo Fisher            |
| Lipofectamine 2000 Transfection Reagent                                   | 11668-019       | Thermo Fisher            |
| PrimeScript RT reagent Kit With gDNA Eraser<br>(Perfect Real Time)        | RR047A          | Takara                   |
| P3 Primary Cell 4D-Nucleofector® X Kit L (24<br>RCT)                      | V4XP-3024       | Lonza                    |
| B cell isolation kit,mouse                                                | 130-090-862     | Miltenyi Biotec          |
| PE Mouse anti-Bcl-6                                                       | 561522          | BD biosciences           |
| Goat Anti-Mouse IgG2a-HRP                                                 | 1081-05         | SouthernBiotech          |
| Goat Anti-Mouse IgG2b-HRP                                                 | 1091-05         | SouthernBiotech          |
| NP-KLH (Keyhole Limpet Hemocyanin)                                        | N-5060-25       | Bioresearch technologies |
| NP-BSA (Bovine Serum Albumin), Ratio 1-4                                  | N-5050XL-<br>10 | Bioresearch technologies |
| NP-BSA (Bovine Serum Albumin), Ratio > 20                                 | N-5050H-10      | Bioresearch technologies |
| Goat polyclonal anti-IgG1 HRP                                             | 1071-05         | SouthernBiotech          |
| Imject™ Alum Adjuvant                                                     | 77161           | Thermo Fisher            |
| FITC anti-mouse IgD                                                       | 553510          | BD biosciences           |



|                                                                                   |             |                           |
|-----------------------------------------------------------------------------------|-------------|---------------------------|
| APC-Cy <sup>TM</sup> 7 Anti-Mouse CD69                                            | 561240      | BD biosciences            |
| PE-Cy <sup>TM</sup> 7 Anti-Mouse CD19                                             | 552854      | BD biosciences            |
| PE Anti-Mouse IgG1                                                                | 550083      | BD biosciences            |
| APC anti-Mouse CD138                                                              | 558626      | BD biosciences            |
| PerCP-Cy <sup>TM</sup> 5.5 Anti-Mouse IgM                                         | 562034      | BD biosciences            |
| Murine IL-4                                                                       | 214-14-20   | PeptoTech                 |
| AffiniPure F(ab') <sub>2</sub> Fragment Goat Anti-Mouse IgM, $\mu$ chain specific | 115-006-020 | Jackson immunoresearch    |
| CD40 Monoclonal Antibody (HM40-3), Functional Grade, eBioscience <sup>TM</sup>    | 16-0402-82  | Thermo Fisher             |
| Phospho-(Ser/Thr) Phe Antibody                                                    | 9631        | Cell signaling Technology |
| NFIL3 Antibody                                                                    | 11773-1-AP  | Proteintech               |
| Rat anti-C3 antibody                                                              | 11H9        | Abcam                     |
| Cy3-conjugated goat anti-Rat IgG                                                  | GB21302     | Servicebio                |
| Alexa Fluor 488-conjugated goat anti-mouse IgG                                    | 150113      | Abcam                     |
| Mouse anti-dsDNA IgG-specific ELISA Kit                                           | 5120        | Alpha diagnostic          |
| Mouse anti-RNP IgG-specific ELISA Kit                                             | 5410        | Alpha diagnostic          |

**Supplemental Table 6. Primers**

|                        |                           |
|------------------------|---------------------------|
| human $\beta$ -actin F | TGGCACCCAGCACAAATG AA     |
| human $\beta$ -actin R | CTAAGTCATAGTCCGCCTAGAAGCA |
| mouse $\beta$ -actin F | AATCGTGCGTGACATCAAAG      |
| mouse $\beta$ -actin R | GGATTCCATACCCAAGAAGG      |
| m-Bcl6-FP              | AGACGCACAGTGACAAACCA      |
| m-Bcl6-RP              | AGTGTGGGTCTTCAGGTTGG      |
| m-IL21-FP              | CGCCTCCTGATTAGACTTCG      |
| m-IL21-RP              | AAAACAGGCAAAAGCTGCAT      |
| m-prdm1-FP             | AGTGCAATGTCTGTGCCAAG      |
| m-prdm1-RP             | TTGAGATTGCTTGTGCTGCT      |
| m-Tcf-7-FP             | CAATCTGCTCATGCCCTACC      |
| m-Tcf-7-RP             | CTTGCTTCTGGCTGATGTCC      |
| m-Pou2af1-FP           | GACATGTACGTGCAGCCTGT      |
| m-Pou2af1-RP           | CGGGTGTAGCAGTGCTTCTT      |
| m-Pdcd1-FP             | CGTCCCTCAGTCAAGAGGAG      |
| m-Pdcd1-RP             | GTCCCTAGAAGTGCCCAACA      |
| m-Tiam1-FP             | TGCAGTTCCCCAGAGAGC        |
| m-Tiam1-RP             | CACACAATCTCTTGCCTCCA      |
| m-CD40L-FP             | CCTTGCTGAACTGTGAGGAGA     |
| m-CD40L-RP             | CTTCGCTTACAACGTGTGCT      |
